# Supplementary material for: Practical copper-catalyzed chloronitration of alkenes with TMSCl and guanidine nitrate
Source: Royal Society of Chemistry journal article supplement (doi:10.1039/d0qo00691b), 2020-01-01

## Supporting Information

# Practical copper-catalyzed chloronitration of alkenes with TMSCl and guanidine nitrate

Si-Yuan Li, Zhen-Yu Guan, Jing Xue, Guang-Yi Zhang, Xiao-Yu Guan, and Qing-Hai Deng\*

The Education Ministry Key Lab of Resource Chemistry and Shanghai Key Laboratory of Rare Earth  
Functional Materials, Shanghai Normal University, Shanghai 200234, P. R. China

E-mail: [qinghaideng@shnu.edu.cn](mailto:qinghaideng@shnu.edu.cn)

### Table of Contents

|                                                                                                         |    |
|---------------------------------------------------------------------------------------------------------|----|
| Table of Contents .....                                                                                 | 1  |
| I. General Information .....                                                                            | 2  |
| II. Optimization of Reaction Conditions.....                                                            | 2  |
| III. Chloronitration.....                                                                               | 6  |
| General Procedure (A) for Chloronitration of Alkenes .....                                              | 6  |
| General Procedure (B) for Chloronitration of Alkenes .....                                              | 6  |
| General Procedure (C) for Chloronitration of Alkenes .....                                              | 6  |
| General Procedure (D) for Chloronitration of Alkynes.....                                               | 7  |
| IV. The synthesis of Nitroalkenes .....                                                                 | 22 |
| General Procedure (E) for Nitroalkenes.....                                                             | 22 |
| General Procedure (F) for Nitroalkenes .....                                                            | 22 |
| V. 100 mmol Scale of Chloronitration of Alkenes.....                                                    | 32 |
| VI. Sequential Further Transformations .....                                                            | 33 |
| VII. Substrate Limitation .....                                                                         | 36 |
| VIII. Control Experiments .....                                                                         | 39 |
| IX. Raman Spectra .....                                                                                 | 40 |
| X. NMR Monitoring Experiments .....                                                                     | 41 |
| XI. <sup>1</sup> H- <sup>1</sup> H NOE spectrum of 3ac.....                                             | 44 |
| XII. References .....                                                                                   | 44 |
| XIII. NMR Spectra of New Compounds ( <sup>1</sup> H NMR, <sup>13</sup> C NMR, <sup>19</sup> F NMR)..... | 45 |

## I. General Information

All manipulations were maintained under an atmosphere of nitrogen unless otherwise stated. Commercially available reagents were used without further purification. Solvents were pre-dried over activated 4 Å molecular sieves and were refluxed over sodium-benzophenone (toluene, tetrahydrofuran), phosphorus pentoxide (chlorobenzene) or calcium hydride (dichloromethane, dichloroethane, acetonitrile). Column chromatography was performed on silica gel (200-300 mesh). <sup>1</sup>H NMR spectra were recorded on a 400 or 600 MHz NMR spectrometer and <sup>13</sup>C NMR spectra were recorded on a 101 MHz NMR spectrometer. Infrared spectra were prepared as KBr pellets and were recorded on a Varian Excalibur 3100 series FT-IR spectrometer. Mass spectra were recorded by the mass spectrometry service of Shanghai Institute of Organic Chemistry. The Raman spectra at 25 °C were taken with Jobin Yvon confocal laser Raman system (SuperLabRam II), which was equipped with a He-Ne laser at 632.8 nm with a power of approximately 5 mW. **1a**, **1b**, **1c**, **1d**, **1e**, **1f**, **1g**, **1h**, **1i**, **1j**, **1k**, **1l**, **1m**, **1n**, **1h**, **1i**, **1j**, **1k**, **1r** **1s**, **1ab**, **1ac**, **1ad**, **4a**, **12a**, **12b**, **12c**, **12d** was commercially available; **1t**<sup>1</sup>, **1u**<sup>1</sup>, **1v**<sup>1</sup>, **1w**<sup>1</sup>, **1x**<sup>1</sup>, **1y**<sup>1</sup>, **1z**<sup>1</sup>, **1ae**<sup>2</sup>, **1af**<sup>2</sup>, **4b**<sup>3</sup>, **4c**<sup>3</sup>, **4d**<sup>3</sup>, **4e**<sup>3</sup>, **4f**<sup>3</sup>, **4h**<sup>4</sup> was prepared according to published procedures.

**CAUTION:** nitration reagents, intermediates, or side products such polynitrated compounds might be potentially explosive. Although under the conditions and scale described here we did not encounter any problems, appropriate precautions should be taken when handling these compounds in general. All nitration reactions and subsequent workups were performed behind a blast shield.

## II. Optimization of Reaction Conditions

**Table S1.** Optimization of the Reaction Conditions (“NO<sub>2</sub>” source) for the Synthesis of Product **3a**<sup>a</sup>

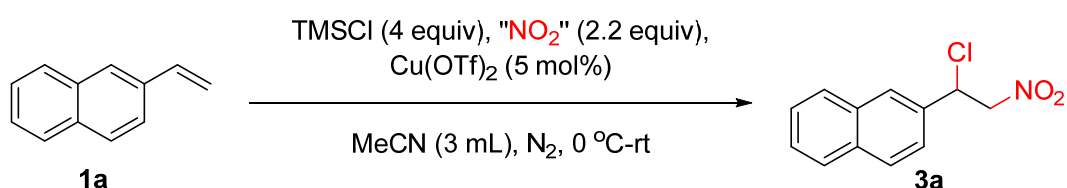

| Entry          | “NO <sub>2</sub> ”                                                | Time (h) | Yield <sup>b</sup> (%) |
|----------------|-------------------------------------------------------------------|----------|------------------------|
| 1              | AgNO <sub>3</sub>                                                 | 2        | 80                     |
| 2              | LiNO <sub>3</sub>                                                 | 23       | 86                     |
| 3              | NaNO <sub>3</sub>                                                 | 8        | 78                     |
| 4              | <b>2</b>                                                          | 12       | 92                     |
| 5              | Me <sub>4</sub> NO <sub>3</sub>                                   | 72       | trace                  |
| 6              | <i>n</i> -Bu <sub>4</sub> NO <sub>3</sub>                         | 72       | trace                  |
| 7              | NaNO <sub>2</sub>                                                 | 14       | 30                     |
| 8              | AgNO <sub>2</sub>                                                 | 3        | 12                     |
| 9 <sup>c</sup> | Cu(NO <sub>3</sub> ) <sub>2</sub> ·3H <sub>2</sub> O <sup>d</sup> | 1        | 93                     |

<sup>a</sup> Reaction condition: **1a** (0.50 mmol), TMSCl (4 equiv), “NO<sub>2</sub>” (2.2 equiv), Cu(OTf)<sub>2</sub> (5 mol%), MeCN (3 mL), N<sub>2</sub>. <sup>b</sup> The yield was determined with <sup>1</sup>H NMR by adding 1,2-dichloroethane as an internal standard. <sup>c</sup> Cu(OTf)<sub>2</sub> (5 mol%) was not added in this reaction. <sup>d</sup> 0.75 equivalent amount of Cu(NO<sub>3</sub>)<sub>2</sub>·3H<sub>2</sub>O was used.

**Table S2.** Optimization of the Reaction Conditions (TMSX or RCOCl) for the Synthesis of Product 3a<sup>a</sup>

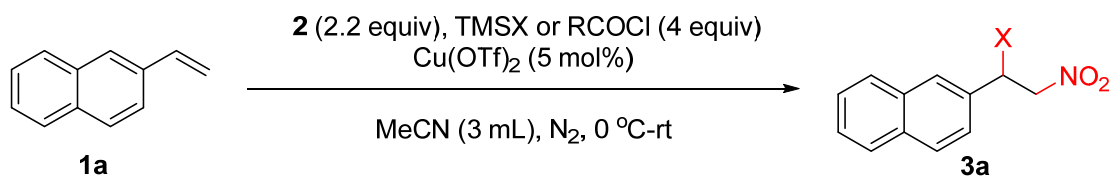

| Entry | TMSX or RCOCl      | Time (h) | Yield <sup>b</sup> (%) |
|-------|--------------------|----------|------------------------|
| 1     | TMSBr              | 72       | n.d.                   |
| 2     | TMSOTf             | 72       | n.d.                   |
| 3     | TMSCN              | 72       | trace                  |
| 4     | TMSCF <sub>3</sub> | 72       | trace                  |
| 5     | TMSN <sub>3</sub>  | 72       | complex                |
| 6     | AcCl               | 24       | 80                     |
| 7     | PivCl              | 72       | 15                     |
| 8     | PhOCOCl            | 72       | trace                  |
| 9     | MeOCOCl            | 72       | 15                     |

<sup>a</sup> Reaction condition: **1a** (0.50 mmol), TMSX or RCOCl (4 equiv), **2** (2.2 equiv), Cu(OTf)<sub>2</sub> (5 mol%), MeCN (3 mL), N<sub>2</sub>. <sup>b</sup> The yield was determined with <sup>1</sup>H NMR by adding 1,2-dichloroethane as an internal standard. n.d.: no detected

**Table S3.** Optimization of the Reaction Conditions (**Cat.**) for the Synthesis of Product **3a**<sup>a</sup>

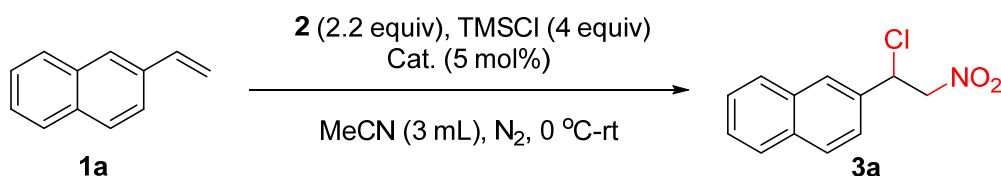

| Entry | Cat.                                    | Time (h) | Yield <sup>b</sup> (%) |
|-------|-----------------------------------------|----------|------------------------|
| 1     | CuCl                                    | 6        | 91                     |
| 2     | CuCl <sub>2</sub>                       | 18       | 91                     |
| 3     | Cu(NO <sub>3</sub> ) <sub>2</sub>       | 18       | 93                     |
| 4     | CuSO <sub>4</sub> •5H <sub>2</sub> O    | 16       | 93                     |
| 5     | Cu                                      | 21       | 90                     |
| 6     | Cu <sub>2</sub> O                       | 6        | 80                     |
| 7     | CuO                                     | 15       | 93                     |
| 8     | FeCl <sub>2</sub>                       | 72       | trace                  |
| 9     | MnCl <sub>2</sub>                       | 72       | trace                  |
| 10    | Zn(OAc) <sub>2</sub>                    | 72       | trace                  |
| 11    | Co(OAc) <sub>2</sub> •4H <sub>2</sub> O | 72       | trace                  |
| 12    | Mg(OTf) <sub>2</sub>                    | 72       | trace                  |

<sup>a</sup> Reaction condition: **1a** (0.50 mmol), TMSCl (4 equiv), **2** (2.2 equiv), Cat. (5 mol%), MeCN (3 mL), N<sub>2</sub>. <sup>b</sup> The yield was determined with <sup>1</sup>H NMR by adding 1,2-dichloroethane as an internal standard.

**Table S4.** Optimization of the Reaction Conditions (**solvent**) for the Synthesis of Product **3a**<sup>a</sup>

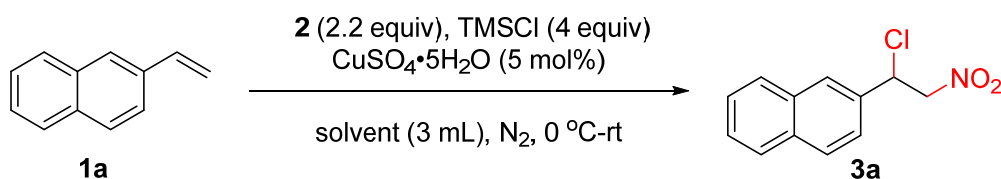

| Entry | solvent | Time (h) | Yield <sup>b</sup> (%) |
|-------|---------|----------|------------------------|
|-------|---------|----------|------------------------|

|          |         |    |       |
|----------|---------|----|-------|
| <b>1</b> | DCM     | 72 | trace |
| <b>2</b> | DCE     | 72 | trace |
| <b>3</b> | THF     | 72 | trace |
| <b>4</b> | Toluene | 72 | trace |
| <b>5</b> | EtOH    | 72 | trace |
| <b>6</b> | AcOH    | 72 | trace |
| <b>7</b> | DMF     | 72 | trace |
| <b>8</b> | DMSO    | 72 | trace |

<sup>a</sup> Reaction condition: **1a** (0.50 mmol), TMSCl (4 equiv), **2** (2.2 equiv), CuSO<sub>4</sub>•5H<sub>2</sub>O (5 mol%), solvent (3 mL), N<sub>2</sub>. <sup>b</sup> The yield was determined with <sup>1</sup>H NMR by adding 1,2-dichloroethane as an internal standard.

**Table S5.** Optimization of the Reaction Conditions (**reactant amounts**) for the Synthesis of Product **3a**<sup>a</sup>

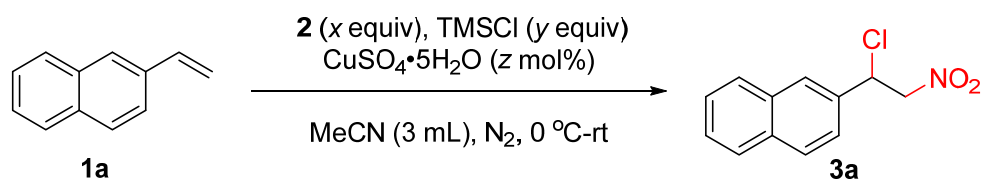

| Entry                 | <i>x</i> | <i>y</i> | <i>z</i> | Time (h) | Yield <sup>b</sup> (%) |
|-----------------------|----------|----------|----------|----------|------------------------|
| <b>1</b>              | 2.2      | 0        | 5        | 72       | n.d.                   |
| <b>2</b>              | 2.2      | 2        | 5        | 120      | 64                     |
| <b>3</b>              | 2.2      | 4        | 5        | 16       | 93                     |
| <b>4</b>              | 2.2      | 6        | 5        | 18       | 75                     |
| <b>5</b>              | 2.0      | 4        | 5        | 19       | 91                     |
| <b>6</b>              | 1.5      | 4        | 5        | 19       | 90                     |
| <b>7</b>              | 1.2      | 4        | 5        | 20       | 83                     |
| <b>8</b>              | 2.2      | 4        | 1        | 72       | 91                     |
| <b>9</b>              | 2.2      | 4        | 0        | 72       | n.d.                   |
| <b>10</b>             | 2.2      | 4        | 10       | 8        | 99                     |
| <b>11</b>             | 1.5      | 3        | 10       | 9        | 99                     |
| <b>12<sup>c</sup></b> | 1.5      | 3        | 10       | 12       | 95                     |

<sup>a</sup> Reaction condition: **1a** (0.50 mmol), TMSCl (*x* equiv), **2** (*y* equiv), CuSO<sub>4</sub>•5H<sub>2</sub>O (*z*

mol%), solvent (3 mL), N<sub>2</sub>. <sup>b</sup> The yield was determined with <sup>1</sup>H NMR by adding 1,2-dichloroethane as an internal standard. <sup>c</sup> **1a** (5 mmol), TMSCl (3 equiv), **2** (1.5 equiv), CuSO<sub>4</sub>•5H<sub>2</sub>O (10 mol%), solvent (10 mL), N<sub>2</sub>.

### III. Chloronitration

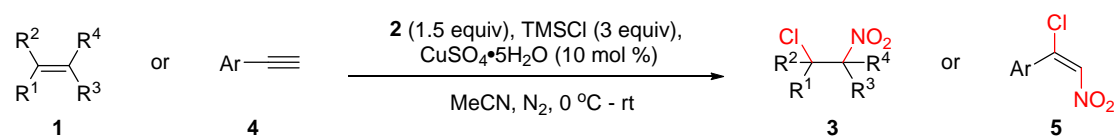

#### General Procedure (A) for Chloronitration of Alkenes

To a 50 mL dry flask were added alkene (5.0 mmol), **2** (915 mg, 7.5 mmol), TMSCl(1.65 mL, 15 mmol), CuSO<sub>4</sub>•5H<sub>2</sub>O (125 mg, 0.50 mmol) and MeCN (10 mL) at 0 °C under N<sub>2</sub> atmosphere. The solution was stirred for 2 h at 0 °C, and then warmed to room temperature as monitoring by TLC. Upon completion, the reaction mixture was filtered. The filtrate was concentrated and purified by short column chromatography (about 5 cm high) via silica gel to give the desired product.

#### General Procedure (B) for Chloronitration of Alkenes

To a 50 mL dry flask were added alkene (10 mmol), **2** (1.83 g, 15 mmol), TMSCl(3.3 mL, 30 mmol), CuSO<sub>4</sub>•5H<sub>2</sub>O (250 mg, 1.0 mmol) and MeCN (25 mL) at 0 °C under N<sub>2</sub> atmosphere. The solution was stirred for 2 h at 0 °C, and then warmed to room temperature as monitoring by TLC. Upon completion, the reaction mixture was filtered. The filtrate was concentrated and purified by short column chromatography (about 5 cm high) via silica gel to give the desired product.

#### General Procedure (C) for Chloronitration of Alkenes

To a 10 mL dry flask were added alkene (0.50 mmol), **2** (91.5 mg, 0.75 mmol), TMSCl(165 μL, 1.5 mmol), CuSO<sub>4</sub>•5H<sub>2</sub>O (12.5 mg, 0.05 mmol) and MeCN (3 mL) at 0 °C under N<sub>2</sub> atmosphere. The solution was stirred for 2 h at 0 °C then warmed to room temperature as monitoring by TLC. Upon completion, the reaction mixture was concentrated and purified by short column chromatography (about 5 cm high) via

silica gel to give the desired product.

### General Procedure (D) for Chloronitration of Alkynes

To a 10 mL dry flask were added alkyne (0.50 mmol), **2** (91.5 mg, 0.75 mmol), TMSCl (165  $\mu$ L, 1.5 mmol), CuSO<sub>4</sub>•5H<sub>2</sub>O (12.5 mg, 0.05 mmol) and MeCN (3 mL) at 0 °C under N<sub>2</sub> atmosphere. The solution was stirred for 2 h at 0 °C then warmed to room temperature as monitoring by TLC. Upon completion, the reaction mixture was concentrated and purified by column chromatography via silica gel to give the desired product.

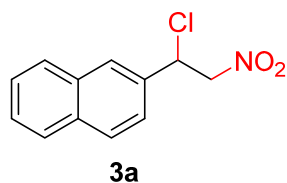

**2-(1-chloro-2-nitroethyl)naphthalene (3a)**; It was prepared according to general procedure (A); reaction temperature: 0 °C (2 h) then rt; reaction time: 12 h; petroleum ether/ethyl acetate = 20 : 1; **TLC**:  $R_f$  = 0.4 (PE/EA=20 : 1, UV); white solid (m.p.: 109.5-111.9 °C); 92% yield (1.081 g, 4.6 mmol); **<sup>1</sup>H NMR (400 MHz, Chloroform-*d*)**  $\delta$  7.91 (d,  $J$  = 8.5 Hz, 1H), 7.89 (d,  $J$  = 1.9 Hz, 1H), 7.86 (dd,  $J$  = 6.2, 3.3 Hz, 2H), 7.58 – 7.50 (m, 3H), 5.74 (dd,  $J$  = 9.0, 5.7 Hz, 1H), 5.01 (dd,  $J$  = 13.5, 9.0 Hz, 1H), 4.89 (dd,  $J$  = 13.5, 5.7 Hz, 1H); **<sup>13</sup>C<sup>5</sup> NMR (101 MHz, Chloroform-*d*)**  $\delta$  133.8, 133.1, 129.6, 128.3, 128.0, 127.4, 127.2, 127.1, 124.0, 80.9, 57.3; **IR  $\nu$  (neat, cm<sup>-1</sup>)**: 3010, 2985, 1632, 1275, 1260, 706; **HRMS (ESI, m/z)**: calcd for C<sub>12</sub>H<sub>11</sub>ClNO<sub>2</sub><sup>+</sup> [M+H]<sup>+</sup>: 236.0473; found: 236.0462.

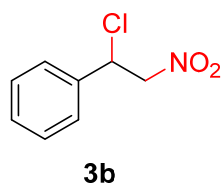

**(1-chloro-2-nitroethyl)benzene (3b)**<sup>6</sup>; It was prepared according to general procedure (B); reaction temperature: 0 °C (2 h) then rt; reaction time: 12 h;

petroleum ether/ethyl acetate = 20 : 1; **TLC**:  $R_f$  = 0.4 (PE/EA=20 : 1, UV); green yellow oil; 95% yield (1.762 g, 9.5 mmol);  **$^1\text{H NMR}$  (400 MHz, Chloroform-*d*)**  $\delta$  7.45 – 7.39 (m, 5H), 5.57 (dd,  $J$  = 9.2, 5.5 Hz, 1H), 4.91 (dd,  $J$  = 13.5, 9.2 Hz, 1H), 4.78 (dd,  $J$  = 13.4, 5.5 Hz, 1H).

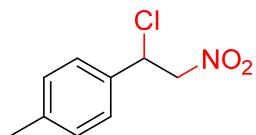

**3c**

**1-(1-chloro-2-nitroethyl)-4-methylbenzene (3c)**; It was prepared according to general procedure (A); reaction temperature: 0 °C (2 h) then rt; reaction time: 12 h; petroleum ether/ethyl acetate = 20 : 1; **TLC**:  $R_f$  = 0.4 (PE/EA=20 : 1, UV); white solid (m.p.: 63.6-64.5 °C); 85% yield (848 mg, 4.2 mmol);  **$^1\text{H NMR}$  (400 MHz, Chloroform-*d*)**  $\delta$  7.31 (d,  $J$  = 8.1 Hz, 2H), 7.21 (d,  $J$  = 8.1 Hz, 2H), 5.53 (dd,  $J$  = 9.1, 5.7 Hz, 1H), 4.90 (dd,  $J$  = 13.4, 9.1 Hz, 1H), 4.77 (dd,  $J$  = 13.4, 5.7 Hz, 1H), 2.37 (s, 3H);  **$^{13}\text{C}^5\text{ NMR}$  (101 MHz, Chloroform-*d*)**  $\delta$  140.1, 133.1, 130.1, 127.2, 81.0, 57.0, 21.3; **IR  $\nu$  (neat,  $\text{cm}^{-1}$ )**: 3005, 2918, 1557, 1374, 1275, 1260, 816, 750; **HRMS (ESI,  $m/z$ )**: calcd for  $\text{C}_9\text{H}_{11}\text{ClNO}_2^+$  [ $\text{M}+\text{H}$ ] $^+$ : 200.0473; found: 200.0455.

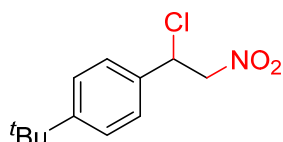

**3d**

**1-(tert-butyl)-4-(1-chloro-2-nitroethyl)benzene (3d)**; It was prepared according to general procedure (A); reaction temperature: 0 °C (2 h) then rt; reaction time: 22 h; petroleum ether/ethyl acetate = 20 : 1; **TLC**:  $R_f$  = 0.4 (PE/EA=20 : 1, UV); green yellow oil; 89% yield (1.076 g, 4.5 mmol);  **$^1\text{H NMR}$  (400 MHz, Chloroform-*d*)**  $\delta$  7.42 (d,  $J$  = 8.4 Hz, 2H), 7.35 (d,  $J$  = 8.4 Hz, 2H), 5.55 (dd,  $J$  = 9.2, 5.5 Hz, 1H), 4.90 (dd,  $J$  = 13.5, 9.2 Hz, 1H), 4.77 (dd,  $J$  = 13.5, 5.5 Hz, 1H), 1.32 (s, 9H);  **$^{13}\text{C}\{^1\text{H}\}$  NMR (101 MHz, Chloroform-*d*)**  $\delta$  153.2, 132.9, 127.0, 126.4, 81.0, 56.9, 34.9, 31.3; **IR  $\nu$  (neat,  $\text{cm}^{-1}$ )**: 2965, 1559, 1519, 1376, 1274, 1109, 969, 837, 745, 682, 563; **HRMS (ESI,  $m/z$ )**: calcd for  $\text{C}_{12}\text{H}_{17}\text{ClNO}_2^+$  [ $\text{M}+\text{H}$ ] $^+$ : 242.0943; found: 242.0971.



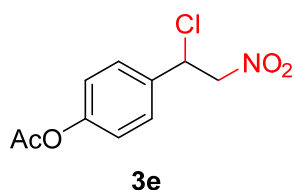

**4-(1-chloro-2-nitroethyl)phenyl acetate (3e)**; It was prepared according to general procedure (A); reaction temperature: 0 °C (2 h) then rt; reaction time: 15 h; petroleum ether/ethyl acetate = 20 : 1; **TLC**:  $R_f$ =0.2 (PE/EA=20 : 1, UV); white solid (m.p.: 85.8-89.2 °C); 89% yield (1.080 g, 4.4 mmol); **<sup>1</sup>H NMR (400 MHz, Chloroform-*d*)** δ 7.45 (d,  $J$  = 8.4 Hz, 2H), 7.15 (d,  $J$  = 8.4 Hz, 2H), 5.57 (dd,  $J$  = 9.1, 5.5 Hz, 1H), 4.89 (dd,  $J$  = 13.5, 9.1 Hz, 1H), 4.76 (dd,  $J$  = 13.5, 5.5 Hz, 1H), 2.31 (s, 3H); **<sup>13</sup>C{<sup>1</sup>H} NMR (101 MHz, Chloroform-*d*)** δ 169.2, 151.7, 133.4, 128.6, 122.6, 80.9, 56.3, 21.2; **IR  $\nu$  (neat, cm<sup>-1</sup>)**: 3005, 2989, 1632, 1507, 1275, 1206, 896, 748; **HRMS (ESI, m/z)**: calcd for C<sub>10</sub>H<sub>11</sub>ClNO<sub>4</sub><sup>+</sup> [M+H]<sup>+</sup>: 244.0371; found: 244.0355.

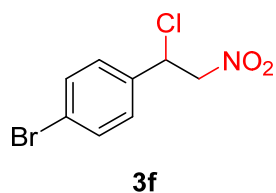

**1-bromo-4-(1-chloro-2-nitroethyl)benzene (3f)**<sup>7</sup>; It was prepared according to general procedure (A); reaction temperature: 0 °C (2 h) then rt; reaction time: 10 h; petroleum ether/ethyl acetate = 20 : 1; **TLC**:  $R_f$ =0.4 (PE/EA=20 : 1, UV); white solid (m.p.: 74.3-75.7 °C); 96% yield (1.263 g, 4.8 mmol); **<sup>1</sup>H NMR (400 MHz, Chloroform-*d*)** δ 7.55 (d,  $J$  = 8.5 Hz, 2H), 7.31 (d,  $J$  = 8.5 Hz, 2H), 5.52 (dd,  $J$  = 8.8, 6.0 Hz, 1H), 4.89 (dd,  $J$  = 13.5, 8.7 Hz, 1H), 4.76 (dd,  $J$  = 13.5, 6.0 Hz, 1H); **<sup>13</sup>C{<sup>1</sup>H} NMR (101 MHz, Chloroform-*d*)** δ 135.0, 132.6, 129.0, 124.1, 80.6, 56.1; **IR  $\nu$  (neat, cm<sup>-1</sup>)**: 3005, 2984, 1601, 1558, 1372, 1274, 1160, 831, 751; **HRMS (ESI, m/z)**: calcd for C<sub>8</sub>H<sub>8</sub>BrClNO<sub>2</sub><sup>+</sup> [M+H]<sup>+</sup>: 263.9422; found: 263.9421.

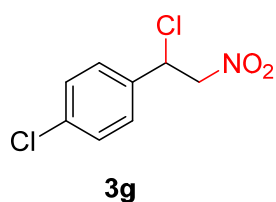

**1-chloro-4-(1-chloro-2-nitroethyl)benzene (3g)**; It was prepared according to

general procedure (A); reaction temperature: 0 °C (2 h) then rt; reaction time: 12 h; petroleum ether/ethyl acetate = 20 : 1; **TLC**:  $R_f$  = 0.4 (PE/EA=20 : 1, UV); white solid (m.p.: 70.0-70.4 °C); 90% yield (993 mg, 4.5 mmol); **<sup>1</sup>H NMR (400 MHz, Chloroform-*d*)** δ 7.39 (d,  $J$ =8.9 Hz, 2H), 7.37 (d,  $J$  = 8.9 Hz, 2H), 5.53 (dd,  $J$  = 8.7, 6.0 Hz, 1H), 4.89 (dd,  $J$  = 13.5, 8.7 Hz, 1H), 4.76 (dd,  $J$  = 13.5, 6.0 Hz, 1H); **<sup>13</sup>C{<sup>1</sup>H} NMR (101 MHz, Chloroform-*d*)** δ 135.9, 134.5, 129.6, 128.7, 80.7, 56.1; **IR ν (neat, cm<sup>-1</sup>)**: 3005, 2989, 1556, 1493, 1376, 1275, 1260, 897, 748; **HRMS (ESI, m/z)**: calcd for C<sub>8</sub>H<sub>8</sub>Cl<sub>2</sub>NO<sub>2</sub><sup>+</sup> [M+H]<sup>+</sup>: 219.9927; found: 219.9826.

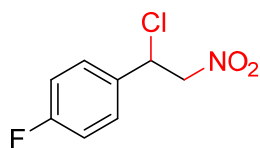

**3h**

**1-(1-chloro-2-nitroethyl)-4-fluorobenzene (3h)**; It was prepared according to general procedure (A), reaction temperature: 0 °C (2 h) then rt; reaction time: 12 h; petroleum ether/ethyl acetate = 20 : 1; **TLC**:  $R_f$  = 0.4 (PE/EA=20 : 1, UV); white solid (m.p.: 63.2-64.0 °C); 95% yield (1.932 g, 9.5 mmol); **<sup>1</sup>H NMR (400 MHz, Chloroform-*d*)** δ 7.46 – 7.39 (m, 2H), 7.15 – 7.06 (m, 2H), 5.55 (dd,  $J$  = 8.8, 6.0 Hz, 1H), 4.90 (dd,  $J$  = 13.4, 8.7 Hz, 1H), 4.77 (dd,  $J$  = 13.4, 6.0 Hz, 1H); **<sup>13</sup>C{<sup>1</sup>H} NMR (101 MHz, Chloroform-*d*)** δ 163.4 (d,  $J$  = 250.1 Hz), 131.9 (d,  $J$  = 3.0 Hz), 129.3 (d,  $J$  = 8.6 Hz), 116.5 (d,  $J$  = 22.0 Hz), 80.8, 56.1; **<sup>19</sup>F NMR (376 MHz, Chloroform-*d*)** δ 96.38; **IR ν (neat, cm<sup>-1</sup>)**: 3005, 2984, 1602, 1557, 1374, 1274, 1260, 1160, 835, 749, 521; **HRMS (ESI, m/z)**: calcd for C<sub>8</sub>H<sub>8</sub>ClFNO<sub>2</sub><sup>+</sup> [M+H]<sup>+</sup>: 204.0222; found: 204.0217.

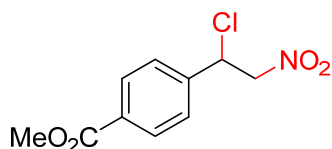

**3i**

**methyl 4-(1-chloro-2-nitroethyl)benzoate (3i)**; It was prepared according to general procedure (B); reaction temperature: 0 °C (2 h) then rt; reaction time: 15 h ; petroleum ether/ethyl acetate = 20 : 1; **TLC**:  $R_f$  = 0.2 (PE/EA=20 : 1, UV); white solid (m.p.: 60.3-60.9 °C); 83% yield (2.013 g, 8.3 mmol); **<sup>1</sup>H NMR (400 MHz,**

**Chloroform-*d***)  $\delta$  8.09 (d,  $J = 8.4$  Hz, 2H), 7.52 (d,  $J = 8.4$  Hz, 2H), 5.60 (dd,  $J = 8.8$ , 5.9 Hz, 1H), 4.92 (dd,  $J = 13.5$ , 8.8 Hz, 1H), 4.80 (dd,  $J = 13.5$ , 5.9 Hz, 1H), 3.94 (s, 3H);  $^{13}\text{C}\{^1\text{H}\}$  NMR (101 MHz, Chloroform-*d*)  $\delta$  166.2, 140.6, 131.7, 130.7, 127.5, 80.6, 56.2, 52.5; IR  $\nu$  (neat,  $\text{cm}^{-1}$ ): 2955, 2922, 1634, 1560, 1376, 1276, 1110, 968, 749, 706; HRMS (ESI,  $m/z$ ): calcd for  $\text{C}_{10}\text{H}_{11}\text{ClNO}_4^+$   $[\text{M}+\text{H}]^+$ : 244.0371; found: 244.0269.

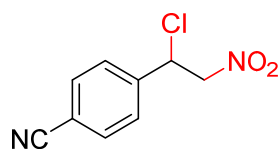

**3j**

**4-(1-chloro-2-nitroethyl)benzonitrile (3j)**; It was prepared according to general procedure (A); reaction temperature: 0 °C (2 h) then rt; reaction time: 5 h; petroleum ether/ethyl acetate = 10 : 1; TLC:  $R_f = 0.1$  (PE/EA=9 : 1, UV); white solid (m.p.: 62.3-63.4 °C); 81% yield (858 mg, 4.1 mmol);  $^1\text{H}$  NMR (400 MHz, Chloroform-*d*)  $\delta$  7.73 (d,  $J = 8.5$  Hz, 2H), 7.58 (d,  $J = 8.5$  Hz, 2H), 5.58 (dd,  $J = 8.5$ , 6.3 Hz, 1H), 4.92 (dd,  $J = 13.6$ , 8.5 Hz, 1H), 4.79 (dd,  $J = 13.6$ , 6.3 Hz, 1H);  $^{13}\text{C}\{^1\text{H}\}$  NMR (101 MHz, Chloroform-*d*)  $\delta$  140.9, 133.2, 128.3, 117.9, 113.9, 80.2, 55.6; IR  $\nu$  (neat,  $\text{cm}^{-1}$ ): 3005, 2918, 2227, 1639, 1549, 1275, 1260, 750, 749; HRMS (ESI,  $m/z$ ): calcd for  $\text{C}_9\text{H}_8\text{ClN}_2\text{O}_2^+$   $[\text{M}+\text{H}]^+$ : 211.0269; found: 211.0273.

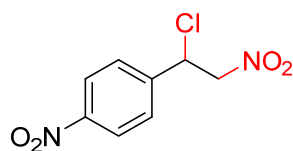

**3k**

**1-(1-chloro-2-nitroethyl)-4-nitrobenzene (3k)**; It was prepared according to general procedure (A); reaction temperature: 0 °C (2 h) then rt; reaction time: 4 h; petroleum ether/ethyl acetate = 10 : 1; TLC:  $R_f = 0.2$  (PE/EA=10 : 1, UV); white solid (m.p.: 83.4-84.7 °C); 89% yield (1.026 g, 4.4 mmol);  $^1\text{H}$  NMR (400 MHz, Chloroform-*d*)  $\delta$  8.29 (d,  $J = 8.8$  Hz, 2H), 7.65 (d,  $J = 8.8$  Hz, 2H), 5.64 (dd,  $J = 8.3$ , 6.4 Hz, 1H), 4.95 (dd,  $J = 13.6$ , 8.3 Hz, 1H), 4.83 (dd,  $J = 13.6$ , 6.4 Hz, 1H);  $^{13}\text{C}\{^1\text{H}\}$  NMR (101 MHz, Chloroform-*d*)  $\delta$  142.7, 129.9, 128.6, 124.6, 80.2, 55.2; IR  $\nu$  (neat,  $\text{cm}^{-1}$ ): 2985, 1555, 1520, 1347, 1260, 913, 749, 704; HRMS (ESI,  $m/z$ ): calcd for

$C_8H_8ClN_2O_4^+$   $[M+H]^+$ : 231.0167; found: 231.0165.

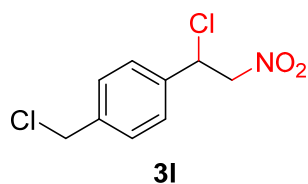

**1-(1-chloro-2-nitroethyl)-4-(chloromethyl)benzene (3l)**; It was prepared according to general procedure (A); reaction temperature: 0 °C (2 h) then rt; reaction time: 12 h; petroleum ether/ethyl acetate = 20 : 1; **TLC**:  $R_f$  = 0.3 (PE/EA=20 : 1, UV); green yellow oil; 98% yield (1.147 g, 4.9 mmol);  **$^1H$  NMR (400 MHz, Chloroform-*d*)**  $\delta$  7.46-7.42 (m, 4H), 5.56 (dd,  $J$  = 8.9, 5.8 Hz, 1H), 4.90 (dd,  $J$  = 13.5, 9.0 Hz, 1H), 4.77 (dd,  $J$  = 13.5, 5.8 Hz, 1H), 4.58 (s, 2H);  **$^{13}C\{^1H\}$  NMR (101 MHz, Chloroform-*d*)**  $\delta$  139.3, 136.1, 129.6, 127.8, 80.8, 56.4, 45.4; **IR  $\nu$  (neat,  $cm^{-1}$ )**: 3006, 2987, 1634, 1556, 1375, 1275, 1216, 968, 749, 680; **HRMS (ESI,  $m/z$ )**: calcd for  $C_9H_{10}Cl_2NO_2^+$   $[M+H]^+$ : 233.0083; found: 233.0075.

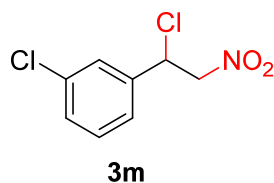

**1-chloro-3-(1-chloro-2-nitroethyl)benzene (3m)**; It was prepared according to general procedure (B); reaction temperature: 0 °C (2 h) then rt; reaction time: 15 h;; petroleum ether/ethyl acetate = 20 : 1; **TLC**:  $R_f$  = 0.4 (PE/EA=20 : 1, UV); green yellow oil; 93% yield (2.046 g, 9.3 mmol);  **$^1H$  NMR (400 MHz, Chloroform-*d*)**  $\delta$  7.44 (d,  $J$  = 2.0 Hz, 1H), 7.40 – 7.33 (m, 2H), 7.31 (dt,  $J$  = 6.7, 2.0 Hz, 1H), 5.52 (dd,  $J$  = 8.8, 5.9 Hz, 1H), 4.89 (dd,  $J$  = 13.5, 8.8 Hz, 1H), 4.77 (dd,  $J$  = 13.5, 5.8 Hz, 1H);  **$^{13}C\{^1H\}$  NMR (101 MHz, Chloroform-*d*)**  $\delta$  137.9, 135.4, 130.7, 130.2, 127.6, 125.5, 80.6, 56.0; **IR  $\nu$  (neat,  $cm^{-1}$ )**: 3006, 1635, 1474, 1275, 1190, 1082, 876, 751, 702; **HRMS (ESI,  $m/z$ )**: calcd for  $C_8H_8Cl_2NO_2^+$   $[M+H]^+$ : 219.9927; found: 220.0017.

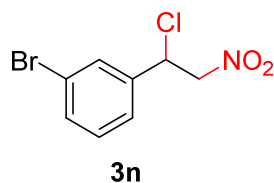

**1-bromo-3-(1-chloro-2-nitroethyl)benzene (3n)**; It was prepared according to

general procedure (B); reaction temperature: 0 °C (2 h) then rt; reaction time: 20 h; petroleum ether/ethyl acetate = 20 : 1; **TLC**:  $R_f$  = 0.4 (PE/EA=20 : 1, UV); green yellow oil; 95% yield (1.256 g, 4.7 mmol);  **$^1\text{H}$  NMR (400 MHz, Chloroform-*d*)**  $\delta$  7.60 (t,  $J$  = 1.9 Hz, 1H), 7.56-7.50 (m, 1H), 7.37 (dt,  $J$  = 7.9, 1.5 Hz, 1H), 7.29 (t,  $J$  = 7.9 Hz, 1H), 5.51 (dd,  $J$  = 8.8, 5.8 Hz, 1H), 4.88 (dd,  $J$  = 13.5, 8.8 Hz, 1H), 4.77 (dd,  $J$  = 13.5, 5.8 Hz, 1H);  **$^{13}\text{C}\{^1\text{H}\}$  NMR (101 MHz, Chloroform-*d*)**  $\delta$  138.1, 133.1, 130.9, 130.5, 126.0, 123.3, 80.6, 55.9; **IR  $\nu$  (neat,  $\text{cm}^{-1}$ )**: 3005, 2989, 1556, 1473, 1260, 897, 750, 706; **HRMS (ESI,  $m/z$ )**: calcd for  $\text{C}_8\text{H}_8\text{BrClNO}_2^+$   $[\text{M}+\text{H}]^+$ : 263.9422; found: 263.9323.

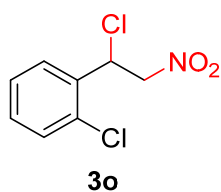

**1-chloro-2-(1-chloro-2-nitroethyl)benzene (3o)**; It was prepared according to general procedure (B); reaction temperature: 0 °C (2 h) then rt; reaction time: 14 h; petroleum ether/ethyl acetate = 20 : 1; **TLC**:  $R_f$  = 0.4 (PE/EA=20 : 1, UV); green yellow oil; 92% yield (2.015 g, 9.2 mmol);  **$^1\text{H}$  NMR (400 MHz, Chloroform-*d*)**  $\delta$  7.61 (dd,  $J$  = 7.3, 2.2 Hz, 1H), 7.46 – 7.42 (m, 1H), 7.40 – 7.32 (m, 2H), 6.10 (dd,  $J$  = 8.7, 5.5 Hz, 1H), 4.88 – 4.84 (m, 1H), 4.84 – 4.78 (m, 1H);  **$^{13}\text{C}\{^1\text{H}\}$  NMR (101 MHz, Chloroform-*d*)**  $\delta$  133.3, 132.9, 130.9, 130.4, 128.9, 128.0, 79.7, 53.7; **IR  $\nu$  (neat,  $\text{cm}^{-1}$ )**: 3005, 1556, 1474, 1374, 1260, 897, 749, 704; **HRMS (ESI,  $m/z$ )**: calcd for  $\text{C}_8\text{H}_8\text{Cl}_2\text{NO}_2^+$   $[\text{M}+\text{H}]^+$ : 219.9927; found: 219.9815.

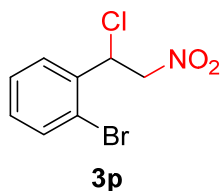

**1-bromo-2-(1-chloro-2-nitroethyl)benzene (3p)**; It was prepared according to general procedure (B); reaction temperature: 0 °C (2 h) then rt; reaction time: 14 h; petroleum ether/ethyl acetate = 20 : 1; **TLC**:  $R_f$  = 0.4 (PE/EA=20 : 1, UV); green yellow oil; 85% yield (2.248 g, 8.5 mmol);  **$^1\text{H}$  NMR (400 MHz, Chloroform-*d*)**  $\delta$  7.62 (d,  $J$  = 8.0 Hz, 2H), 7.42 (t,  $J$  = 7.7 Hz, 1H), 7.26 (t,  $J$  = 7.7 Hz, 1H), 6.09 (dd,  $J$

= 9.4, 4.7 Hz, 1H), 4.85 (dd,  $J = 13.7, 4.7$  Hz, 1H), 4.78 (dd,  $J = 13.7, 9.4$  Hz, 1H);  $^{13}\text{C}\{^1\text{H}\}$  NMR (101 MHz, Chloroform-*d*)  $\delta$  134.9, 133.6, 131.2, 129.1, 128.6, 123.0, 79.8, 56.2; IR  $\nu$  (neat,  $\text{cm}^{-1}$ ): 3005, 2989, 1632, 1556, 1469, 1260, 897, 764, 704; HRMS (ESI,  $m/z$ ): calcd for  $\text{C}_8\text{H}_8\text{BrClNO}_2^+$   $[\text{M}+\text{H}]^+$ : 263.9422; found: 263.9501.

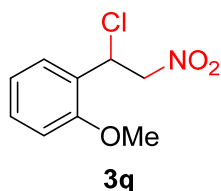

**1-(1-chloro-2-nitroethyl)-2-methoxybenzene (3q)**; It was prepared according to general procedure (A); reaction temperature: 0 °C (2 h) then rt; reaction time: 22 h; petroleum ether/ethyl acetate = 20 : 1; TLC:  $R_f = 0.2$  (PE/EA=20 : 1, UV); green yellow oil; 72% yield (776 mg, 3.6 mmol);  $^1\text{H}$  NMR (400 MHz, Chloroform-*d*)  $\delta$  7.48 (d,  $J = 7.3$  Hz, 1H), 7.41 – 7.32 (m, 1H), 7.02 (t,  $J = 7.6$  Hz, 1H), 6.93 (d,  $J = 8.3$  Hz, 1H), 6.00 (dd,  $J = 8.8, 5.3$  Hz, 1H), 4.94 – 4.76 (m, 2H), 3.90 (s, 3H);  $^{13}\text{C}\{^1\text{H}\}$  NMR (101 MHz, Chloroform-*d*)  $\delta$  156.4, 131.0, 128.7, 123.8, 121.2, 111.2, 80.1, 55.8, 52.8; IR  $\nu$  (neat,  $\text{cm}^{-1}$ ): 3006, 2969, 2841, 1588, 1376, 1275, 1123, 971, 748; HRMS (ESI,  $m/z$ ): calcd for  $\text{C}_9\text{H}_{11}\text{ClNO}_3^+$   $[\text{M}+\text{H}]^+$ : 216.0422; found: 216.0389.

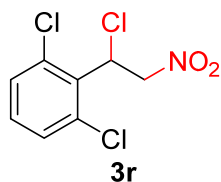

**1,3-dichloro-2-(1-chloro-2-nitroethyl)benzene (3r)**; It was prepared according to general procedure (A); reaction temperature: 0 °C (2 h) then rt; reaction time: 16 h; petroleum ether/ethyl acetate = 20 : 1; TLC:  $R_f = 0.2$  (PE/EA=20 : 1, UV); green yellow oil; 72% yield (916 mg, 3.6 mmol);  $^1\text{H}$  NMR (400 MHz, Chloroform-*d*)  $\delta$  7.43 – 7.38 (m, 2H), 7.31 – 7.27 (m, 1H), 6.56 (dd,  $J = 8.5, 5.3$  Hz, 1H), 5.44 (dd,  $J = 14.1, 8.8$  Hz, 1H), 5.08 (dd,  $J = 14.2, 5.2$  Hz, 1H);  $^{13}\text{C}\{^1\text{H}\}$  NMR (101 MHz, Chloroform-*d*)  $\delta$  135.9, 131.3, 130.8, 129.4, 129.2, 77.8, 51.6; IR  $\nu$  (neat,  $\text{cm}^{-1}$ ): 3012, 2990, 1556, 1437, 1280, 766, 738, 716; HRMS (ESI,  $m/z$ ): calcd for  $\text{C}_8\text{H}_7\text{Cl}_3\text{NO}_2^+$   $[\text{M}+\text{H}]^+$ : 253.9537; found: 253.9485.

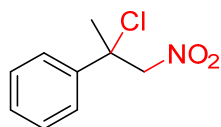

**3s**

**(2-chloro-1-nitropropan-2-yl)benzene (3s)**; It was prepared according to general procedure (C); reaction temperature: 0 °C (2 h) then rt; reaction time: 11 h; petroleum ether/ethyl acetate = 20 : 1; **TLC**:  $R_f$  = 0.5 (PE/EA=20 : 1, UV); yellow oil; 88% yield (88 mg, 0.44 mmol); **<sup>1</sup>H NMR (400 MHz, Chloroform-*d*)**  $\delta$  7.60 – 7.53 (m, 2H), 7.45 – 7.36 (m, 3H), 4.93 (d,  $J$  = 3.0 Hz, 2H), 2.23 (s, 3H); **<sup>13</sup>C{<sup>1</sup>H} NMR (101 MHz, Chloroform-*d*)**  $\delta$  140.2, 129.1, 128.9, 126.3, 86.1, 67.1, 29.2; **IR  $\nu$  (neat, cm<sup>-1</sup>)**: 2919, 1587, 1446, 1372, 1061, 696, 652, 611; **HRMS (ESI, m/z)**: calcd for C<sub>9</sub>H<sub>11</sub>ClNO<sub>2</sub><sup>+</sup> [M+H]<sup>+</sup>: 200.0473; found: 200.0471.

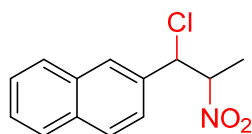

**3t**

**2-(1-chloro-2-nitropropyl)naphthalene (3t)**; It was prepared according to general procedure (C); reaction temperature: 0 °C (2 h) then rt; reaction time: 14 h; petroleum ether/ethyl acetate = 20 : 1; **TLC**:  $R_f$  = 0.4 (PE/EA=20 : 1, UV); white solid (m.p.:69-70 °C); 82% yield (dr = 1 : 0.52, 102 mg, 0.41 mmol); **<sup>1</sup>H NMR (400 MHz, Chloroform-*d*, major)**  $\delta$  7.87 – 7.84 (m, 3H), 7.84 (d,  $J$  = 2.6 Hz, 1H), 7.55 (dd,  $J$  = 6.2, 3.2 Hz, 1H), 7.54 – 7.51 (m, 2H), 5.55 (d,  $J$  = 7.7 Hz, 1H), 5.05 (p,  $J$  = 6.6 Hz, 1H), 1.80 (d,  $J$  = 6.6 Hz, 3H); **<sup>13</sup>C{<sup>1</sup>H} NMR (101 MHz, Chloroform-*d*, major)**  $\delta$  133.8, 133.6, 133.6, 129.2, 128.4, 127.9, 127.5, 127.2, 127.0, 124.2, 87.6, 63.1, 16.0; **IR  $\nu$  (neat, cm<sup>-1</sup>)**: 2920, 1647, 1554, 1450, 1358, 1275, 1260, 820, 749, 662, 477; **HRMS (ESI, m/z)**: calcd for C<sub>13</sub>H<sub>13</sub>ClNO<sub>2</sub><sup>+</sup> [M+H]<sup>+</sup>: 250.0630; found: 250.0628.

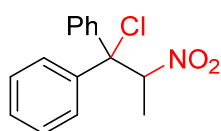

**3u**

**(1-chloro-2-nitropropane-1,1-diyl)dibenzene (3u)**; It was prepared according to

general procedure (A); reaction temperature: 0 °C (2 h) then rt; reaction time: 30 h; petroleum ether/ethyl acetate = 20 : 1; **TLC**:  $R_f$  = 0.3 (PE/EA=20 : 1, UV); white solid (m.p.:100.3-101.1 °C); 64% yield (879 mg, 3.2 mmol); **<sup>1</sup>H NMR (400 MHz, Chloroform-*d*)** δ 7.42 – 7.46 (m, 4H), 7.40 – 7.27 (m, 6H), 5.79 (q,  $J$  = 6.6 Hz, 1H), 1.81 (d,  $J$  = 6.6 Hz, 3H); **<sup>13</sup>C{<sup>1</sup>H} NMR (101 MHz, Chloroform-*d*)** δ 141.24, 141.21, 128.6, 128.5, 128.4, 128.0, 127.6, 89.4, 77.3, 17.4; **IR  $\nu$  (neat, cm<sup>-1</sup>):** 3005, 2990, 1557, 1446, 1275, 1260, 1043, 911, 749, 699; **HRMS (ESI, m/z):** calcd for C<sub>15</sub>H<sub>15</sub>ClNO<sub>2</sub><sup>+</sup> [M+H]<sup>+</sup>: 276.0786; found: 276.0779.

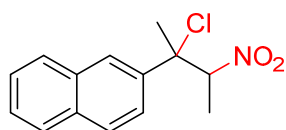

**3v**

**2-(2-chloro-3-nitrobutan-2-yl)naphthalene (3v)**; It was prepared according to general procedure (C); reaction temperature: 0 °C (2 h) then rt; reaction time: 9 h; petroleum ether/ethyl acetate = 40 : 1; **TLC**:  $R_f$  = 0.6 (PE/EA=20 : 1, UV); white solid (m.p.:95.1-97.2 °C); 74% yield (98 mg, 0.37 mmol); **<sup>1</sup>H NMR (400 MHz, Chloroform-*d*)** δ 7.99 (d,  $J$  = 2.1 Hz, 1H), 7.91 – 7.80 (m, 3H), 7.66 (dd,  $J$  = 8.8, 2.1 Hz, 1H), 7.58 – 7.47 (m, 2H), 5.27 (q,  $J$  = 6.7 Hz, 1H), 2.26 (s, 3H), 1.71 (d,  $J$  = 6.7 Hz, 3H); **<sup>13</sup>C{<sup>1</sup>H} NMR (101 MHz, Chloroform-*d*)** δ 137.8, 133.0, 132.8, 128.69, 128.67, 127.6, 127.2, 126.9, 126.1, 124.0, 91.5, 71.7, 27.2, 15.4; **IR  $\nu$  (neat, cm<sup>-1</sup>):** 3005, 2989, 1553, 1456, 1275, 1260, 897, 816, 764; **HRMS (ESI, m/z):** calcd for C<sub>14</sub>H<sub>15</sub>ClNO<sub>2</sub><sup>+</sup> [M+H]<sup>+</sup>: 264.0786; found: 264.0758.

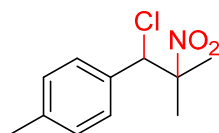

**3w**

**1-(1-chloro-2-methyl-2-nitropropyl)-4-methylbenzene (3w)**; It was prepared according to general procedure (C); reaction temperature: 0 °C (2 h) then rt; reaction time: 12 h; petroleum ether/ethyl acetate = 100 : 1; **TLC**:  $R_f$  = 0.3 (PE/EA=50 : 1, UV); green yellow oil; 77% yield (88 mg, 0.39 mmol); **<sup>1</sup>H NMR (400 MHz, Chloroform-*d*)** δ 7.29 (d,  $J$  = 8.0 Hz, 2H), 7.17 (d,  $J$  = 8.0 Hz, 2H), 5.57 (s, 1H), 2.36



(s, 3H), 1.74 (s, 3H), 1.48 (s, 3H);  $^{13}\text{C}\{^1\text{H}\}$  NMR (101 MHz, Chloroform-*d*)  $\delta$  139.5, 132.5, 129.2, 128.9, 92.4, 67.0, 24.9, 21.3, 20.5; IR  $\nu$  (neat,  $\text{cm}^{-1}$ ): 3005, 2989, 1546, 1464, 1344, 1275, 768, 742, 520; HRMS (ESI,  $m/z$ ): calcd for  $\text{C}_{11}\text{H}_{15}\text{ClNO}_2^+$   $[\text{M}+\text{H}]^+$ : 228.0786; found: 228.0789.

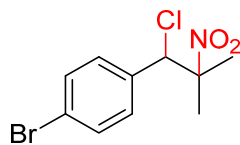

**3x**

**1-bromo-4-(1-chloro-2-methyl-2-nitropropyl)benzene (3x)**<sup>8</sup>; It was prepared according to general procedure (C); reaction temperature: 0 °C (2 h) then rt; reaction time: 11 h; petroleum ether/ethyl acetate = 100 : 1; TLC:  $R_f$  = 0.1 (PE, UV); white solid (m.p.: 43.1-46.7 °C); 91% yield (133 mg, 0.45 mmol);  $^1\text{H}$  NMR (400 MHz, Chloroform-*d*)  $\delta$  7.51 (d,  $J$  = 8.4 Hz, 2H), 7.29 (dt,  $J$  = 8.4 Hz, 2H), 5.55 (s, 1H), 1.73 (s, 3H), 1.49 (s, 3H);  $^{13}\text{C}\{^1\text{H}\}$  NMR (101 MHz, Chloroform-*d*)  $\delta$  134.5, 131.8, 130.6, 123.7, 92.0, 66.2, 24.5, 20.9; IR  $\nu$  (neat,  $\text{cm}^{-1}$ ): 3004, 2983, 1548, 1459, 1278, 1253, 746, 695; HRMS (ESI,  $m/z$ ): calcd for  $\text{C}_{10}\text{H}_{12}\text{BrClNO}_2^+$   $[\text{M}+\text{H}]^+$ : 291.9735; found: 291.9729.

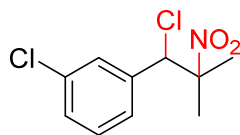

**3y**

**1-chloro-3-(1-chloro-2-methyl-2-nitropropyl)benzene (3y)**; It was prepared according to general procedure (C); reaction temperature: 0 °C (2 h) then rt; reaction time: 12 h; petroleum ether/ethyl acetate = 100 : 1; TLC:  $R_f$  = 0.4 (PE/EA=20 : 1, UV); green yellow oil; 73% yield (91 mg, 0.37 mmol);  $^1\text{H}$  NMR (400 MHz, Chloroform-*d*)  $\delta$  7.43 (d,  $J$  = 1.9 Hz, 1H), 7.36 (dt,  $J$  = 7.5, 1.9 Hz, 1H), 7.34 – 7.27 (m, 2H), 5.56 (s, 1H), 1.75 (s, 3H), 1.51 (s, 3H);  $^{13}\text{C}\{^1\text{H}\}$  NMR (101 MHz, Chloroform-*d*)  $\delta$  137.5, 134.7, 129.8, 129.7, 129.1, 127.2, 92.1, 66.0, 24.6, 20.9; IR  $\nu$  (neat,  $\text{cm}^{-1}$ ): 3005, 2989, 1547, 1469, 1345, 1275, 1260, 897, 768, 742; HRMS (ESI,  $m/z$ ): calcd for  $\text{C}_{10}\text{H}_{12}\text{Cl}_2\text{NO}_2^+$   $[\text{M}+\text{H}]^+$ : 248.0240; found: 248.0227.

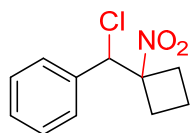

**3z**

**(chloro(1-nitrocyclobutyl)methyl)benzene (3z)**; It was prepared according to general procedure (C); reaction temperature: 0 °C (2 h) then rt; reaction time: 12 h; petroleum ether/ethyl acetate = 50 : 1; **TLC**:  $R_f$  = 0.5 (PE/EA=20 : 1, UV); colorless oil; 89% yield (100 mg, 0.44 mmol);  **$^1\text{H}$  NMR (400 MHz, Chloroform-*d*)**  $\delta$  7.51 – 7.44 (m, 2H), 7.43 – 7.36 (m, 3H), 5.55 (s, 1H), 3.01 – 2.91 (m, 1H), 2.80 – 2.69 (m, 1H), 2.68 – 2.52 (m, 2H), 1.84-1.76 (m, 1H), 1.36 – 1.24 (m, 1H);  **$^{13}\text{C}\{^1\text{H}\}$  NMR (101 MHz, Chloroform-*d*)**  $\delta$  135.3, 129.6, 128.8, 128.4, 92.8, 64.1, 30.7, 28.7, 13.3; **IR  $\nu$  (neat,  $\text{cm}^{-1}$ )**: 3005, 2989, 1478, 1457, 1275, 1260, 897, 751, 696; **HRMS (ESI,  $m/z$ )**: calcd for  $\text{C}_{10}\text{H}_{13}\text{ClNO}_2^+$   $[\text{M}+\text{H}]^+$ : 226.0630; found: 226.0638.

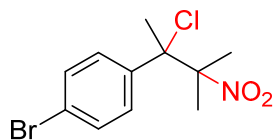

**3aa**

**1-bromo-4-(2-chloro-3-methyl-3-nitrobutan-2-yl)benzene (3aa)**; It was prepared according to general procedure (C); reaction temperature: 0 °C (2 h) then rt; reaction time: 13 h; petroleum ether/ethyl acetate = 200 : 1; **TLC**:  $R_f$  = 0.4 (PE/EA=100 : 1, UV); colorless oil; 50% yield (77 mg, 0.25 mmol);  **$^1\text{H}$  NMR (400 MHz, Chloroform-*d*)**  $\delta$  7.48 (d,  $J$  = 8.8 Hz, 2H), 7.38 (d,  $J$  = 8.8 Hz, 2H), 2.16 (s, 3H), 1.75 (s, 3H), 1.64 (s, 3H);  **$^{13}\text{C}\{^1\text{H}\}$  NMR (101 MHz, Chloroform-*d*)**  $\delta$  139.1, 131.1, 129.9, 123.1, 94.9, 74.9, 28.3, 23.6, 23.5; **IR  $\nu$  (neat,  $\text{cm}^{-1}$ )**: 3014, 2997, 1537, 1488, 1380, 1348, 1282, 1260, 774, 745; **HRMS (ESI,  $m/z$ )**: calcd for  $\text{C}_{11}\text{H}_{14}\text{BrClNO}_2^+$   $[\text{M}+\text{H}]^+$ : 305.9891; found: 305.9794.

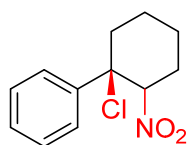

**3ab**

**((1R)-1-chloro-2-nitrocyclohexyl)benzene (3ab)**<sup>6</sup>; It was prepared according to

general procedure (C); reaction temperature: 0 °C (2 h) then rt; reaction time: 9 h; petroleum ether/ethyl acetate = 40 : 1; **TLC**:  $R_f$  = 0.4 (PE/EA=20 : 1, UV); light yellow solid; 93% yield (111 mg, 0.47 mmol); **<sup>1</sup>H NMR (400 MHz, Chloroform-*d*)**  $\delta$  7.58 – 7.54 (m, 2H), 7.40 – 7.35 (m, 2H), 7.34 – 7.29 (m, 1H), 5.41 (dt,  $J$  = 4.6, 2.0 Hz, 1H), 3.19 – 3.10 (m, 1H), 2.66 – 2.53 (m, 1H), 2.42 (d,  $J$  = 14.4 Hz, 1H), 2.31 – 2.22 (m, 1H), 2.05 – 1.91 (m, 2H), 1.78 – 1.62 (m, 2H).

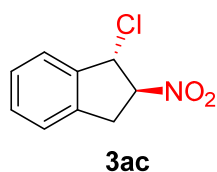

**(1S,2S)-1-chloro-2-nitro-2,3-dihydro-1H-indene (3ac)**; It was prepared according to general procedure (A); reaction temperature: 0 °C (2 h) then rt; reaction time: 20 h; petroleum ether/ethyl acetate = 40 : 1; **TLC**:  $R_f$  = 0.4 (PE/EA=20 : 1, UV); green yellow oil; 84% yield (831 mg, 4.2 mmol); **<sup>1</sup>H NMR (400 MHz, Chloroform-*d*)**  $\delta$  7.49 – 7.44 (m, 1H), 7.39 – 7.34 (m, 2H), 7.28 (d,  $J$  = 3.8 Hz, 1H), 5.93 (d,  $J$  = 4.4 Hz, 1H), 5.34 (ddd,  $J$  = 8.0, 5.4, 4.4 Hz, 1H), 3.74 (dd,  $J$  = 16.8, 8.0 Hz, 1H), 3.60 (dd,  $J$  = 16.7, 5.4 Hz, 1H); **<sup>13</sup>C{<sup>1</sup>H} NMR (101 MHz, Chloroform-*d*)**  $\delta$  138.9, 137.7, 130.3, 128.7, 125.5, 124.9, 92.5, 62.5, 36.4; **IR  $\nu$  (neat, cm<sup>-1</sup>)**: 3091, 2918, 1551, 1496, 1369, 1215, 913, 819, 602; **HRMS (ESI, m/z)**: calcd for C<sub>9</sub>H<sub>9</sub>ClNO<sub>2</sub><sup>+</sup> [M+H]<sup>+</sup>: 198.0317; found: 198.0309.

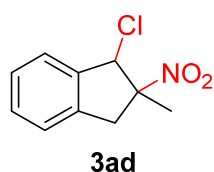

**1-chloro-2-methyl-2-nitro-2,3-dihydro-1H-indene (3ad)**; It was prepared according to general procedure (C); reaction temperature: 0 °C (2 h) then rt; reaction time: 14 h; petroleum ether/ethyl acetate = 50 : 1; **TLC**:  $R_f$  = 0.6 (PE/EA=20 : 1, UV); yellow oil; 77% yield (dr = 1 : 0.3, 82 mg, 0.39 mmol); **<sup>1</sup>H NMR (400 MHz, Chloroform-*d*, major)**  $\delta$  7.44 – 7.41 (m, 1H), 7.34 – 7.31 (m, 2H), 7.25 – 7.22 (m, 1H), 6.04 (s, 1H), 3.87 (d,  $J$  = 16.4 Hz, 1H), 3.34 (d,  $J$  = 16.4 Hz, 1H), 1.88 (s, 3H); **<sup>13</sup>C{<sup>1</sup>H} NMR (101**

**MHz, Chloroform-*d*, major)**  $\delta$  139.4, 137.8, 129.9, 128.4, 125.3, 124.8, 97.6, 66.5, 42.9, 22.4; **IR  $\nu$  (neat,  $\text{cm}^{-1}$ ):** 3108, 2920, 1646, 1546, 1382, 1269, 842, 749, 602; **HRMS (ESI,  $m/z$ ):** calcd for  $\text{C}_{10}\text{H}_{11}\text{ClNO}_2^+$   $[\text{M}+\text{H}]^+$ : 212.0473; found: 212.0477.

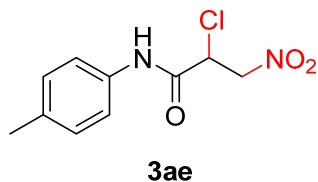

**2-chloro-3-nitro-N-(p-tolyl)propanamide (3ae);** It was prepared according to general procedure (C); reaction temperature: 0 °C (2 h) then rt; reaction time: 12 h; petroleum ether/ethyl acetate = 20: 1 to 5 : 1; **TLC:**  $R_f$  = 0.2 (PE/EA=5 : 1, UV); yellow solid (m.p.:95.5-101.5 °C); 57% yield (69 mg, 0.28 mmol);  **$^1\text{H}$  NMR (400 MHz, Chloroform-*d*)**  $\delta$  8.24 (s, 1H), 7.39 (d,  $J$  = 8.0 Hz, 2H), 7.17 (d,  $J$  = 8.0 Hz, 2H), 5.13 (dd,  $J$  = 14.2, 4.0 Hz, 1H), 5.05 (dd,  $J$  = 6.7, 4.0 Hz, 1H), 4.97 (dd,  $J$  = 14.2, 6.7 Hz, 1H), 2.34 (s, 3H);  **$^{13}\text{C}\{^1\text{H}\}$  NMR (101 MHz, Chloroform-*d*)**  $\delta$  162.7, 135.8, 133.8, 129.9, 120.6, 77.1, 54.1, 21.1; **IR  $\nu$  (neat,  $\text{cm}^{-1}$ ):** 3005, 2920, 1679, 1559, 1374, 1275, 1260, 816, 746; **HRMS (ESI,  $m/z$ ):** calcd for  $\text{C}_{10}\text{H}_{12}\text{ClN}_2\text{O}_3^+$   $[\text{M}+\text{H}]^+$ : 243.0531; found: 243.0522.

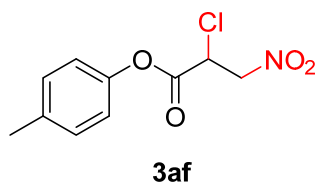

***p*-tolyl-2-chloro-3-nitropropanoate (3af);** It was prepared according to general procedure (C); reaction temperature: 0 °C (2 h) then rt; reaction time: 12 h; petroleum ether/ethyl acetate = 20: 1; **TLC:**  $R_f$  = 0.3 (PE/EA=10 : 1, UV); light pink solid (m.p.:67.1-68.4 °C); 65% yield (79 mg, 0.32 mmol);  **$^1\text{H}$  NMR (400 MHz, Chloroform-*d*)**  $\delta$  7.21 (d,  $J$  = 8.0 Hz, 2H), 7.03 (d,  $J$  = 8.0 Hz, 2H), 5.14 – 5.04 (m, 2H), 4.93-4.86 (m, 1H), 2.36 (s, 3H);  **$^{13}\text{C}\{^1\text{H}\}$  NMR (101 MHz, Chloroform-*d*)**  $\delta$  165.4, 148.0, 136.8, 130.3, 120.7, 75.6, 49.8, 21.1; **IR  $\nu$  (neat,  $\text{cm}^{-1}$ ):** 3005, 2989, 1766, 1564, 1375, 1275, 1260, 749; **HRMS (ESI,  $m/z$ ):** calcd for  $\text{C}_{10}\text{H}_{11}\text{ClNO}_4^+$   $[\text{M}+\text{H}]^+$ : 244.0371; found: 243.0363.

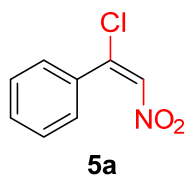

**(E)-1-(1-chloro-2-nitrovinyl)benzene (5a)**<sup>9</sup>; It was prepared according to procedure (D); reaction temperature: 0 °C (2 h) then rt; reaction time: 12 h; petroleum ether/ethyl acetate = 100: 1; **TLC**:  $R_f$  = 0.3 (PE/EA=50 : 1, UV); yellow solid; 54% yield (50 mg, 0.27 mmol); **<sup>1</sup>H NMR (400 MHz, Chloroform-*d*)**  $\delta$  7.49 – 7.46 (m, 2H), 7.46 – 7.41 (m, 4H).

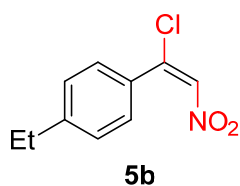

**(E)-1-(1-chloro-2-nitrovinyl)-4-ethylbenzene (5b)**<sup>9</sup>; It was prepared according to procedure (D); reaction temperature: 0 °C (2 h) then rt; reaction time: 12 h; petroleum ether/ethyl acetate = 100: 1; **TLC**:  $R_f$  = 0.3 (PE/EA=50 : 1, UV); yellow solid; 56% yield (59 mg, 0.28 mmol); **<sup>1</sup>H NMR (400 MHz, Chloroform-*d*)**  $\delta$  7.45 (s, 1H), 7.37 (d,  $J$  = 8.3 Hz, 2H), 7.28 (d,  $J$  = 8.3 Hz, 2H), 2.71 (q,  $J$  = 7.6 Hz, 2H), 1.27 (t,  $J$  = 7.6 Hz, 3H).

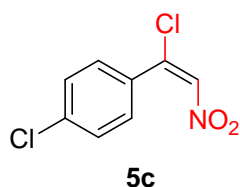

**(E)-1-chloro-4-(1-chloro-2-nitrovinyl)benzene (5c)**<sup>9</sup>; It was prepared according to procedure (F); reaction temperature: 0 °C (2 h) then rt; reaction time: 12 h; petroleum ether/ethyl acetate = 100: 1; **TLC**:  $R_f$  = 0.3 (PE/EA=50 : 1, UV); yellow solid; 37% yield (40 mg, 0.18 mmol); **<sup>1</sup>H NMR (400 MHz, Chloroform-*d*)**  $\delta$  7.47 (s, 1H), 7.42 (d,  $J$  = 8.6 Hz, 2H), 7.38 (d,  $J$  = 8.6 Hz, 2H).

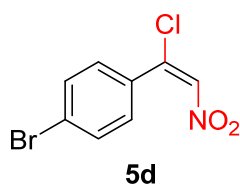

**(E)-1-bromo-4-(1-chloro-2-nitrovinyl)benzene (5d)**<sup>9</sup>; It was prepared according to procedure **(D)**; reaction temperature: 0 °C (2 h) then rt; reaction time: 12 h; petroleum ether/ethyl acetate = 100: 1; **TLC**:  $R_f$  = 0.3 (PE/EA=50 : 1, UV); yellow solid; 53% yield (70 mg, 0.27 mmol); **<sup>1</sup>H NMR (400 MHz, Chloroform-*d*)**  $\delta$  7.59 (d,  $J$  = 8.4 Hz, 2H), 7.47 (s, 1H), 7.31 (d,  $J$  = 8.4 Hz, 2H).

#### IV. The Synthesis of Nitroalkenes

##### General Procedure (E) for Nitroalkenes

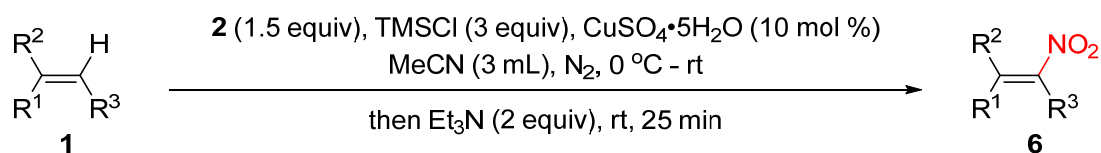

To a 10 mL dry flask were added alkene (0.50 mmol), **2** (91.5 mg, 0.75 mmol), TMSCl (165  $\mu$ L, 1.5 mmol), CuSO<sub>4</sub>•5H<sub>2</sub>O (12.5 mg, 0.05 mmol) and MeCN (3 mL) at 0 °C under N<sub>2</sub> atmosphere. The mixture was stirred for 2 h at 0 °C first and then warmed to room temperature as monitoring by TLC. Upon completion, Et<sub>3</sub>N (100  $\mu$ L, 1.0 mmol) was added to the mixture and stirred for 25 min at room temperature. After that, the reaction mixture was concentrated and purified by column chromatography on silica gel to give the desired product.

##### General Procedure (F) for Nitroalkenes

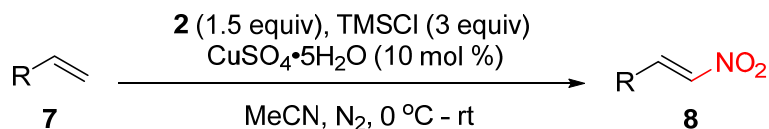

To a 10 mL dry flask were added alkene (0.50 mmol), **2** (91.5 mg, 0.75 mmol), TMSCl (165  $\mu$ L, 1.5 mmol), CuSO<sub>4</sub>•5H<sub>2</sub>O (12.5 mg, 0.05 mmol) and MeCN (3 mL) at 0 °C under N<sub>2</sub> atmosphere. The solution was stirred for 2 h at 0 °C first and then warmed to room temperature as monitoring by TLC. Upon completion, the reaction

mixture was concentrated and purified by column chromatography on silica gel to give the desired product.

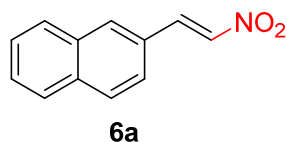

**(E)-2-(2-nitrovinyl)naphthalene (6a)**<sup>10</sup>; It was prepared according to general procedure **(E)**; reaction temperature: 0 °C (2 h) then rt; reaction time: 12.5 h; petroleum ether/ethyl acetate = 20: 1; **TLC**:  $R_f$  = 0.5 (PE/EA=20 : 1, UV); yellow solid; 99% yield (99 mg, 0.50 mmol); **<sup>1</sup>H NMR (400 MHz, Chloroform-*d*)**  $\delta$  8.17 (d,  $J$  = 13.6 Hz, 1H), 8.03 (s, 1H), 7.97 – 7.82 (m, 3H), 7.71 (d,  $J$  = 13.6 Hz, 1H), 7.65 – 7.50 (m, 3H).

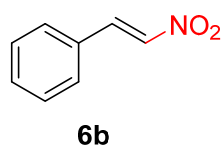

**(E)-2-nitrovinylbenzene (6b)**<sup>11</sup>; It was prepared according to general procedure **(E)**; reaction temperature: 0 °C (2 h) then rt; reaction time: 12.5 h; petroleum ether/ethylacetate = 20 : 1; **TLC**:  $R_f$  = 0.5 (PE/EA=20 : 1, UV); yellow solid; 87% yield(66 mg, 0.44 mmol); **<sup>1</sup>H NMR (400 MHz, Chloroform-*d*)**  $\delta$  8.01 (d,  $J$  = 13.7 Hz, 1H), 7.59 (d,  $J$  = 13.7 Hz, 1H), 7.57 – 7.53 (m, 2H), 7.53 – 7.42 (m, 3H).

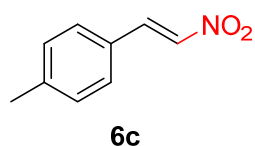

**(E)-1-methyl-4-(2-nitrovinyl)benzene (6c)**<sup>10</sup>; It was prepared according to general procedure **(E)**; reaction temperature: 0 °C (2 h) then rt; reaction time: 12.5 h; petroleum ether/ethylacetate = 20 : 1; **TLC**:  $R_f$  = 0.5 (PE/EA=20 : 1, UV); yellow solid; 84% yield(63 mg, 0.42 mmol); **<sup>1</sup>H NMR (400 MHz, Chloroform-*d*)**  $\delta$  7.99 (d,  $J$  = 13.7 Hz, 1H), 7.57 (d,  $J$  = 13.7 Hz, 1H), 7.45 (d,  $J$  = 8.2 Hz, 2H), 7.29 – 7.24 (d,  $J$  = 8.2 Hz, 2H), 2.41 (s, 3H).

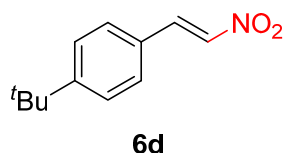

**(E)-1-(tert-butyl)-4-(2-nitrovinyl)benzene (6d)**<sup>11</sup>; It was prepared according to general procedure (E); reaction temperature: 0 °C (2 h) then rt; reaction time: 12.5 h; petroleum ether/ethylacetate = 20 : 1; **TLC**:  $R_f$  = 0.4 (PE/EA=20 : 1, UV); yellow solid; 85% yield(87 mg, 0.42 mmol); **<sup>1</sup>H NMR (400 MHz, Chloroform-*d*)**  $\delta$  8.00 (d,  $J$  = 13.6 Hz, 1H), 7.58 (d,  $J$  = 13.6 Hz, 1H), 7.51-7.46 (m, 4H), 1.34 (s, 9H).

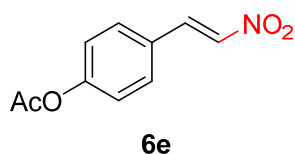

**(E)-4-(2-nitrovinyl)phenyl acetate (6e)**<sup>11</sup>; It was prepared according to general procedure (E); reaction temperature: 0 °C (2 h) then rt; reaction time: 12.5 h; petroleum ether/ethylacetate = 20 : 1; **TLC**:  $R_f$  = 0.6 (PE/EA=10 : 1, UV); yellow solid; 94% yield(97 mg, 0.47 mmol); **<sup>1</sup>H NMR (400 MHz, Chloroform-*d*)**  $\delta$  7.99 (d,  $J$  = 13.7 Hz, 1H), 7.60 – 7.52 (m, 3H), 7.20 (dt,  $J$  = 8.4, 2H), 2.33 (s, 3H).

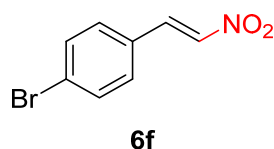

**(E)-1-bromo-4-(2-nitrovinyl)benzene (6f)**<sup>11</sup>; It was prepared according to general procedure (E); reaction temperature: 0 °C (2 h) then rt; reaction time: 12.5 h; petroleum ether/ethylacetate = 20 : 1; **TLC**:  $R_f$  = 0.5 (PE/EA=20 : 1, UV); yellow solid; 98% yield(112 mg, 0.49 mmol); **<sup>1</sup>H NMR (400 MHz, Chloroform-*d*)**  $\delta$  7.95 (d,  $J$  = 13.7 Hz, 1H), 7.65 – 7.53 (m, 3H), 7.42 (d,  $J$  = 8.4 Hz, 2H).

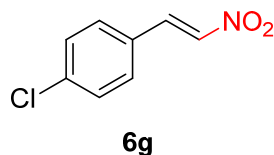

**(E)-1-chloro-4-(2-nitrovinyl)benzene (6g)**<sup>10</sup>; It was prepared according to general procedure (E); reaction temperature: 0 °C (2 h) then rt; reaction time: 12.5 h; petroleum ether/ethylacetate = 20 : 1; **TLC**:  $R_f$  = 0.4 (PE/EA=20 : 1, UV); yellow solid; 89% yield(82 mg, 0.47 mmol); **<sup>1</sup>H NMR (400 MHz, Chloroform-*d*)**  $\delta$  7.96 (d,



$J = 13.7$  Hz, 1H), 7.56 (d,  $J = 13.7$  Hz, 1H), 7.49 (dt,  $J = 8.4$  Hz, 2H), 7.44 (dt,  $J = 8.4$ , 2H).

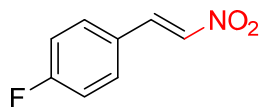

**6h**

**(E)-1-fluoro-4-(2-nitrovinyl)benzene (6h)**<sup>10</sup>; It was prepared according to general procedure (E); reaction temperature: 0 °C (2 h) then rt; reaction time: 12.5 h; petroleum ether/ethylacetate = 20 : 1; **TLC**:  $R_f = 0.4$  (PE/EA=20 : 1, UV); yellow solid; 79% yield(66 mg, 0.40 mmol); **<sup>1</sup>H NMR (400 MHz, Chloroform-*d*)**  $\delta$  7.98 (d,  $J = 13.7$  Hz, 1H), 7.60 – 7.48 (m, 3H), 7.15 (t,  $J = 8.4$  Hz, 2H).

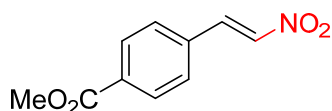

**6i**

**methyl (E)-4-(2-nitrovinyl)benzoate (6i)**<sup>10</sup>; It was prepared according to general procedure (E); reaction temperature: 0 °C (2 h) then rt; reaction time: 8.5 h; petroleum ether/ethylacetate = 10 : 1; **TLC**:  $R_f = 0.4$  (PE/EA=10 : 1, UV); yellow solid; 82% yield(85 mg, 0.41 mmol); **<sup>1</sup>H NMR (400 MHz, Chloroform-*d*)**  $\delta$  8.11 (d,  $J = 8.3$  Hz, 2H), 8.02 (d,  $J = 13.7$  Hz, 1H), 7.67 – 7.59 (m, 3H), 3.95 (s, 3H).

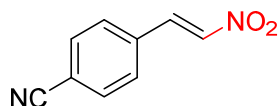

**6j**

**(E)-4-(2-nitrovinyl)benzonitrile (6j)**<sup>10</sup>; It was prepared according to general procedure (E); reaction temperature: 0 °C (2 h) then rt; reaction time: 6.5 h; petroleum ether/ethylacetate = 10 : 1; **TLC**:  $R_f = 0.5$  (PE/EA=20 : 1, UV); yellow solid; 87% yield(76 mg, 0.44 mmol); **<sup>1</sup>H NMR (400 MHz, Chloroform-*d*)**  $\delta$  7.99 (d,  $J = 13.7$  Hz, 1H), 7.76 (d,  $J = 8.4$  Hz, 2H), 7.66 (d,  $J = 8.4$  Hz, 2H), 7.61 (d,  $J = 13.7$  Hz, 1H).

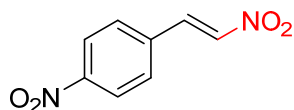

**6k**

**(E)-1-nitro-4-(2-nitrovinyl)benzene (6k)**<sup>12</sup>; It was prepared according to general

procedure (E); reaction temperature: 0 °C (2 h) then rt; reaction time: 6.5 h; petroleum ether/ethylacetate = 20 : 1; **TLC**:  $R_f$  = 0.5 (PE/EA=20 : 1, UV); yellow solid; 72% yield(70 mg, 0.36 mmol); **<sup>1</sup>H NMR (400 MHz, Chloroform-*d*)**  $\delta$  8.32 (d,  $J$  = 8.8 Hz, 2H), 8.04 (d,  $J$  = 13.8 Hz, 1H), 7.73 (d,  $J$  = 8.8 Hz, 2H), 7.64 (d,  $J$  = 13.8 Hz, 1H).

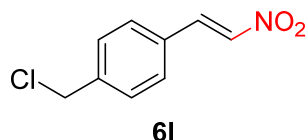

**(E)-1-(chloromethyl)-4-(2-nitrovinyl)benzene (6l)**<sup>13</sup>; It was prepared according to general procedure (E); reaction temperature: 0 °C (2 h) then rt; reaction time: 12.5 h; petroleum ether/ethylacetate = 20 : 1; **TLC**:  $R_f$  = 0.4 (PE/EA=20 : 1, UV); pale yellow solid; 99% yield(98 mg, 0.50 mmol); **<sup>1</sup>H NMR (400 MHz, Chloroform-*d*)**  $\delta$  8.00 (d,  $J$  = 13.7 Hz, 1H), 7.59 (d,  $J$  = 13.7 Hz, 1H), 7.56 (d,  $J$  = 8.3 Hz, 2H), 7.48 (d,  $J$  = 8.3 Hz, 2H), 4.61 (s, 2H).

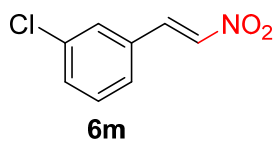

**(E)-1-chloro-3-(2-nitrovinyl)benzene (6m)**<sup>14</sup>; It was prepared according to general procedure (E); reaction temperature: 0 °C (2 h) then rt; reaction time: 12.5 h; petroleum ether/ethylacetate = 20 : 1; **TLC**:  $R_f$  = 0.4 (PE/EA=20 : 1, UV); pale yellow solid; 84% yield(77 mg, 0.42 mmol); **<sup>1</sup>H NMR (400 MHz, Chloroform-*d*)**  $\delta$  7.94 (d,  $J$  = 13.7 Hz, 1H), 7.57 (d,  $J$  = 13.7 Hz, 1H), 7.54 (d,  $J$  = 1.9 Hz, 1H), 7.50 – 7.37 (m, 3H).

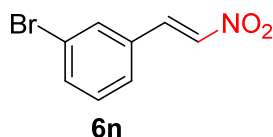

**(E)-1-bromo-3-(2-nitrovinyl)benzene (6n)**<sup>11</sup>; It was prepared according to general procedure (E); reaction temperature: 0 °C (2 h) then rt; reaction time: 12.5 h; petroleum ether/ethylacetate = 20 : 1; **TLC**:  $R_f$  = 0.4 (PE/EA=20 : 1, UV); yellow solid; 90% yield(103 mg, 0.45 mmol); **<sup>1</sup>H NMR (400 MHz, Chloroform-*d*)**  $\delta$  7.93 (d,  $J$  = 13.7 Hz, 1H), 7.69 (s, 1H), 7.62 (d,  $J$  = 8.0 Hz, 1H), 7.56 (d,  $J$  = 13.7 Hz, 1H),

7.48 (d,  $J = 7.7$  Hz, 1H), 7.34 (t,  $J = 7.9$  Hz, 1H).

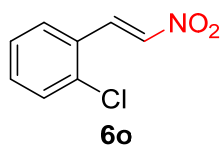

**(E)-1-chloro-2-(2-nitrovinyl)benzene (6o)**<sup>13</sup>; It was prepared according to general procedure (E); reaction temperature: 0 °C (2 h) then rt; reaction time: 12.5 h; petroleum ether/ethylacetate = 20 : 1; **TLC**:  $R_f = 0.4$  (PE/EA=20 : 1, UV); yellow solid; 92% yield(84 mg, 0.46 mmol); **<sup>1</sup>H NMR (400 MHz, Chloroform-*d*)**  $\delta$  8.41 (d,  $J = 13.7$  Hz, 1H), 7.64 – 7.56 (m, 2H), 7.50 (dd,  $J = 8.0, 1.1$  Hz, 1H), 7.46 – 7.40 (m, 1H), 7.38 – 7.31 (m, 1H).

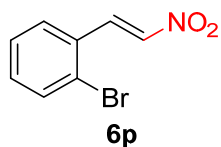

**(E)-1-bromo-2-(2-nitrovinyl)benzene (6p)**<sup>10</sup>; It was prepared according to general procedure (E); reaction temperature: 0 °C (2 h) then rt; reaction time: 12.5 h; petroleum ether/ethylacetate = 20 : 1; **TLC**:  $R_f = 0.4$  (PE/EA=20 : 1, UV); yellow solid; 90% yield(103 mg, 0.45 mmol); **<sup>1</sup>H NMR (400 MHz, Chloroform-*d*)**  $\delta$  8.40 (d,  $J = 13.6$  Hz, 1H), 7.69 (dd,  $J = 7.6, 1.6$  Hz, 1H), 7.58 (dd,  $J = 7.6, 1.9$  Hz, 1H), 7.54 (d,  $J = 13.6$  Hz, 1H), 7.41 – 7.31 (m, 2H).

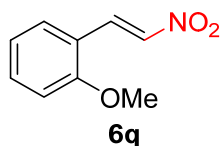

**(E)-1-methoxy-2-(2-nitrovinyl)benzene (6q)**<sup>10</sup>; It was prepared according to general procedure (E); reaction temperature: 0 °C (2 h) then rt; reaction time: 12.5 h; petroleum ether/ethylacetate = 20 : 1; **TLC**:  $R_f = 0.4$  (PE/EA=20 : 1, UV); yellow solid; 70% yield(63 mg, 0.35 mmol); **<sup>1</sup>H NMR (400 MHz, Chloroform-*d*)**  $\delta$  8.15 (d,  $J = 13.6$  Hz, 1H), 7.88 (d,  $J = 13.6$  Hz, 1H), 7.46 (m, 2H), 7.02 (t,  $J = 7.5$  Hz, 1H), 6.98 (d,  $J = 8.3$  Hz, 1H), 3.96 (s, 3H).

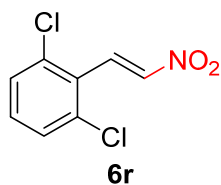

**(E)-1,3-dichloro-2-(2-nitrovinyl)benzene (6r)**<sup>15</sup>; It was prepared according to general procedure (E); reaction temperature: 0 °C (2 h) then rt; reaction time: 12.5 h; petroleum ether/ethylacetate = 20 : 1; **TLC**:  $R_f$  = 0.3 (PE/EA=20 : 1, UV); yellow solid; 74% yield(81 mg, 0.37 mmol); **<sup>1</sup>H NMR (400 MHz, Chloroform-*d*)**  $\delta$  8.26 (d,  $J$  = 14.0 Hz, 1H), 7.85 (d,  $J$  = 14.0 Hz, 1H), 7.49 – 7.36 (m, 2H), 7.31 (dd,  $J$  = 8.8, 7.4 Hz, 1H).

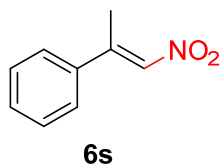

**(E)-(1-nitroprop-1-en-2-yl)benzene (6s)**<sup>10</sup>; It was prepared according to general procedure (E); reaction temperature: 0 °C (2 h) then rt; reaction time: 12.5 h; petroleum ether/ethylacetate = 20 : 1; **TLC**:  $R_f$  = 0.3 (PE/EA=20 : 1, UV); yellow solid; 88% yield(72 mg, 0.44 mmol); **<sup>1</sup>H NMR (400 MHz, Chloroform-*d*)**  $\delta$  7.45 (s, 5H), 7.31 (s, 1H), 2.65 (s, 3H).

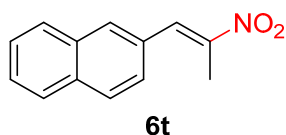

**(E)-2-(2-nitroprop-1-en-1-yl)naphthalene (6t)**<sup>16</sup>; It was prepared according to general procedure (E); reaction temperature: 0 °C (2 h) then rt; reaction time: 12.5 h; petroleum ether/ethylacetate = 20 : 1; **TLC**:  $R_f$  = 0.5 (PE/EA=20 : 1, UV); yellow solid; 83% yield(88 mg, 0.41 mmol); **<sup>1</sup>H NMR (400 MHz, Chloroform-*d*)**  $\delta$  8.26 (s, 1H), 7.99 – 7.83 (m, 4H), 7.64 – 7.44 (m, 3H), 2.55 (s, 3H).

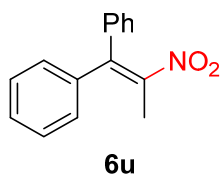

**(2-nitroprop-1-ene-1,1-diyl)dibenzene (6u)**; It was prepared according to general

procedure (E); reaction temperature: 0 °C (2 h) then rt; reaction time: 12.5 h; petroleum ether/ethylacetate = 20 : 1; **TLC**:  $R_f$  = 0.3 (PE/EA=20 : 1, UV); yellow solid (m.p.:61.4-64.1 °C); 67% yield(80 mg, 0.33 mmol); **<sup>1</sup>H NMR (400 MHz, Chloroform-*d*)**  $\delta$  7.41 – 7.33 (m, 3H), 7.34 – 7.28 (m, 3H), 7.23 – 7.18 (m, 2H), 7.18 – 7.12 (m, 2H), 2.35 (s, 3H); **<sup>13</sup>C{<sup>1</sup>H} NMR (101 MHz, Chloroform-*d*)**  $\delta$  146.5, 140.0, 138.4, 138.3, 129.5, 128.9, 128.71, 128.70, 128.67, 128.3, 18.3; **IR  $\nu$  (neat, cm<sup>-1</sup>)**: 3005, 2989, 2277, 1632, 1560, 1503, 1333, 1275, 966, 897, 745, 481; **HRMS (ESI, m/z)**: calcd for C<sub>15</sub>H<sub>14</sub>ClNO<sub>2</sub><sup>+</sup> [M+H]<sup>+</sup>: 240.1019; found: 240.0989.

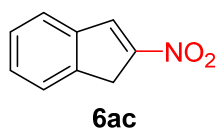

**2-nitro-1H-indene (6ac)**<sup>17</sup>; It was prepared according to general procedure (E); reaction temperature: 0 °C (2 h) then rt; reaction time: 12.5 h; petroleum ether/ethylacetate = 20 : 1; **TLC**:  $R_f$  = 0.4 (PE/EA=20 : 1, UV); yellow solid; 80% yield(64 mg, 0.40 mmol); **<sup>1</sup>H NMR (400 MHz, Chloroform-*d*)**  $\delta$  7.96 – 7.89 (m, 1H), 7.62 (d,  $J$  = 7.5 Hz, 1H), 7.55 – 7.51 (m, 1H), 7.48 (td,  $J$  = 7.4, 1.3 Hz, 1H), 7.45 – 7.38 (m, 1H), 3.99 (d,  $J$  = 2.0 Hz, 2H).

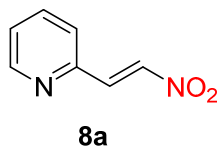

**(E)-2-(2-nitrovinyl)pyridine (8a)**<sup>13</sup>; It was prepared according to procedure (F); reaction temperature: 0 °C (2 h) then rt; reaction time: 12 h; petroleum ether/ethyl acetate = 10: 1; **TLC**:  $R_f$  = 0.1 (PE/EA=10 : 1, UV); yellow solid; 79% yield (59 mg, 0.39 mmol); **<sup>1</sup>H NMR (400 MHz, Chloroform-*d*)**  $\delta$  8.75 – 8.63 (m, 1H), 8.02 (d,  $J$  = 13.2 Hz, 1H), 7.92 (d,  $J$  = 13.2 Hz, 1H), 7.79 (td,  $J$  = 7.7, 1.8 Hz, 1H), 7.48 (d,  $J$  = 7.7 Hz, 1H), 7.38 (dd,  $J$  = 7.7, 4.8 Hz, 1H).

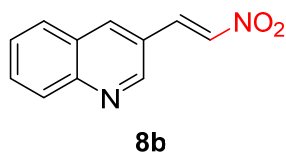

**(E)-3-(2-nitrovinyl)quinoline (8b)**; It was prepared according to procedure (F);

reaction temperature: 0 °C (2 h) then rt; reaction time: 12 h; petroleum ether/ethyl acetate = 10: 1; **TLC:**  $R_f = 0.1$  (PE/EA=10 : 1, UV); yellow solid (m.p.:109.7-111.4 °C); 74% yield (74 mg, 0.37 mmol); **<sup>1</sup>H NMR (400 MHz, Chloroform-*d*)**  $\delta$  9.07 (d,  $J = 2.3$  Hz, 1H), 8.34 (d,  $J = 2.3$  Hz, 1H), 8.23 – 8.10 (m, 2H), 7.90 (d,  $J = 8.2$  Hz, 1H), 7.84 (ddd,  $J = 8.4, 6.9, 1.2$  Hz, 1H), 7.79 (d,  $J = 13.8$  Hz, 1H), 7.65 (ddd,  $J = 8.2, 6.9, 1.2$  Hz, 1H); **<sup>13</sup>C{<sup>1</sup>H} NMR (101 MHz, Chloroform-*d*)**  $\delta$  149.4, 148.9, 138.2, 137.6, 135.9, 131.9, 129.8, 128.7, 128.2, 127.5, 123.4; **IR  $\nu$  (neat, cm<sup>-1</sup>):** 3361, 3188, 2849, 1646, 1511, 1345, 972, 847, 715, 477; **HRMS (ESI, m/z):** calcd for C<sub>11</sub>H<sub>9</sub>N<sub>2</sub>O<sub>2</sub><sup>+</sup> [M+H]<sup>+</sup>: 201.0659; found: 201.0663.

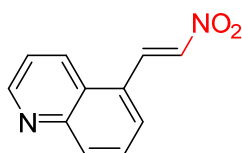

**8c**

**(*E*)-5-(2-nitrovinyl)quinoline (8c);** It was prepared according to procedure (F); reaction temperature: 0 °C (2 h) then rt; reaction time: 12 h; petroleum ether/ethyl acetate = 10: 1; **TLC:**  $R_f = 0.1$  (PE/EA=10 : 1, UV); yellow solid (m.p.:75.8-80.1 °C); 42% yield (42 mg, 0.21 mmol); **<sup>1</sup>H NMR (400 MHz, Chloroform-*d*)**  $\delta$  9.03 (d,  $J = 4.2$  Hz, 1H), 8.76 (d,  $J = 13.4$  Hz, 1H), 8.50 (d,  $J = 8.6$  Hz, 1H), 8.28 (d,  $J = 8.4$  Hz, 1H), 7.85 (d,  $J = 7.2$  Hz, 1H), 7.78 (t,  $J = 7.8$  Hz, 1H), 7.68 (d,  $J = 13.4$  Hz, 1H), 7.58 (dd,  $J = 8.6, 4.2$  Hz, 1H); **<sup>13</sup>C{<sup>1</sup>H} NMR (101 MHz, Chloroform-*d*)**  $\delta$  151.3, 148.6, 139.4, 134.6, 134.0, 131.5, 129.2, 127.5, 127.1, 126.8, 122.4; **IR  $\nu$  (neat, cm<sup>-1</sup>):** 3005, 2240, 1630, 1489, 1347, 1275, 961, 794, 749; **HRMS (ESI, m/z):** calcd for C<sub>11</sub>H<sub>9</sub>N<sub>2</sub>O<sub>2</sub><sup>+</sup> [M+H]<sup>+</sup>: 201.0659; found: 201.0648.

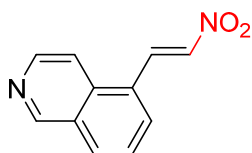

**8d**

**(*E*)-5-(2-nitrovinyl)isoquinoline (8d);** It was prepared according to procedure (F); reaction temperature: 0 °C (2 h) then rt; reaction time: 12 h; petroleum ether/ethyl acetate = 10: 1; **TLC:**  $R_f = 0.1$  (PE/EA=10 : 1, UV); yellow solid (m.p.:189.4-190.2 °C); 62% yield (62 mg, 0.31 mmol); **<sup>1</sup>H NMR (400 MHz,**

**Chloroform-*d***)  $\delta$  9.34 (s, 1H), 8.77 – 8.66 (m, 2H), 8.15 (d,  $J = 8.2$  Hz, 1H), 8.00 (d,  $J = 7.3$  Hz, 1H), 7.93 (d,  $J = 6.0$  Hz, 1H), 7.73 – 7.65 (m, 2H);  **$^{13}\text{C}\{^1\text{H}\}$  NMR (101 MHz, Chloroform-*d*)**  $\delta$  153.6, 144.9, 139.4, 134.5, 134.3, 132.1, 130.3, 127.1, 126.4, 116.0; **IR  $\nu$  (neat,  $\text{cm}^{-1}$ ):** 3005, 2989, 2319, 1654, 1514, 1275, 1260, 897, 724; **HRMS (ESI,  $m/z$ ):** calcd for  $\text{C}_{11}\text{H}_9\text{N}_2\text{O}_2^+$  [ $\text{M}+\text{H}$ ] $^+$ : 201.0659; found: 201.0618.

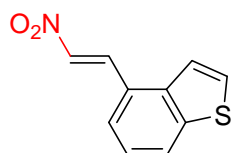

**8e**

**(*E*)-4-(2-nitrovinyl)benzo[*b*]thiophene (8e)**; It was prepared according to procedure (F); reaction temperature: 0 °C (2 h) then rt; reaction time: 12 h; petroleum ether/ethyl acetate = 100 : 1; **TLC:**  $R_f = 0.2$  (PE/EA=50 : 1, UV); yellow solid (m.p.:89.2-91.3 °C); 51% yield (52 mg, 0.52 mmol);  **$^1\text{H}$  NMR (400 MHz, Chloroform-*d*)**  $\delta$  8.53 (d,  $J = 13.6$  Hz, 1H), 8.03 (d,  $J = 8.1$  Hz, 1H), 7.75 – 7.66 (m, 2H), 7.66 – 7.61 (m, 2H), 7.42 (t,  $J = 7.8$  Hz, 1H);  **$^{13}\text{C}\{^1\text{H}\}$  NMR (101 MHz, Chloroform-*d*)**  $\delta$  141.3, 139.3, 137.9, 136.7, 129.6, 126.4, 125.1, 124.5, 124.3, 121.2; **IR  $\nu$  (neat,  $\text{cm}^{-1}$ ):** 3005, 2998, 2700, 2314, 1633, 1504, 1462, 1336, 1260, 898, 788; **HRMS (ESI,  $m/z$ ):** calcd for  $\text{C}_{10}\text{H}_8\text{NO}_2\text{S}^+$  [ $\text{M}+\text{H}$ ] $^+$ : 206.0270; found: 206.0233.

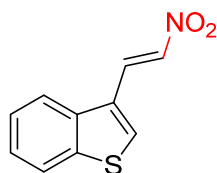

**8f**

**(*E*)-3-(2-nitrovinyl)benzo[*b*]thiophene (8f)**<sup>10</sup>; It was prepared according to procedure (F); reaction temperature: 0 °C (2 h) then rt; reaction time: 12 h; petroleum ether/ethyl acetate = 100: 1; **TLC:**  $R_f = 0.1$  (PE/EA=50 : 1, UV); yellow solid; 50% yield (51 mg, 0.25 mmol);  **$^1\text{H}$  NMR (400 MHz, Chloroform-*d*)**  $\delta$  8.31 (d,  $J = 13.7$  Hz, 1H), 8.03 – 7.89 (m, 3H), 7.77 (d,  $J = 13.7$  Hz, 1H), 7.58 – 7.45 (m, 2H).

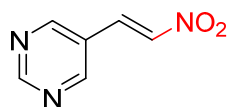

**8g**

**(*E*)-5-(2-nitrovinyl)pyrimidine (8g)**; It was prepared according to procedure (F);

reaction temperature: 0 °C (2 h) then rt; reaction time: 12 h; petroleum ether/ethyl acetate = 5: 1; **TLC**:  $R_f$  = 0.1 (PE/EA=5 : 1, UV); yellow solid; 47% yield (36 mg, 0.24 mmol);  **$^1\text{H}$  NMR (400 MHz, Chloroform-*d*)**  $\delta$  9.30 (s, 1H), 8.94 (s, 2H), 7.96 (d,  $J$  = 13.9 Hz, 1H), 7.67 (d,  $J$  = 13.9 Hz, 1H);  **$^{13}\text{C}\{^1\text{H}\}$  NMR (101 MHz, Chloroform-*d*)**  $\delta$  160.6, 156.5, 139.6, 131.9, 124.8; **IR  $\nu$  (neat,  $\text{cm}^{-1}$ )**: 3015, 2708, 2065, 1639, 1528, 1418, 1275, 958, 696; **HRMS (ESI,  $m/z$ )**: calcd for  $\text{C}_6\text{H}_6\text{N}_3\text{O}_2^+$   $[\text{M}+\text{H}]^+$ : 152.0455; found: 152.0413.

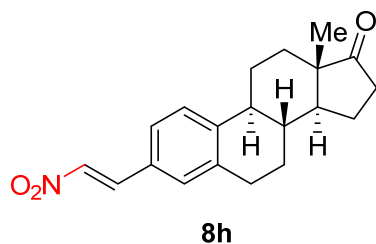

**(8*R*,9*S*,13*S*,14*S*)-13-methyl-3-((*E*)-2-nitrovinyl)-6,7,8,9,11,12,13,14,15,16-decahydro-17*H*-cyclopenta[*a*]phenanthren-17-one (8h)**; It was prepared according to procedure (F),  $\text{LiNO}_3$  (52 mg, 0.75 mmol) was instead of **2**; reaction temperature: 0 °C (2 h) then rt; reaction time: 12 h; petroleum ether/ethyl acetate = 5: 1; **TLC**:  $R_f$  = 0.1 (PE/EA=5 : 1, UV); pale yellow solid (m.p.:210.3-212.8 °C); 77% yield (125 mg, 0.38 mmol);  **$^1\text{H}$  NMR (400 MHz, Chloroform-*d*)**  $\delta$  7.96 (d,  $J$  = 13.7 Hz, 1H), 7.56 (d,  $J$  = 13.7 Hz, 1H), 7.35 (q,  $J$  = 9.2, 8.8 Hz, 2H), 7.28 (s, 1H), 2.98 – 2.93 (m, 2H), 2.58 – 2.48 (m, 1H), 2.42 (s, 1H), 2.39 – 2.27 (m, 1H), 2.23 – 2.11 (m, 1H), 2.10 – 2.02 (m, 2H), 2.02 – 1.94 (m, 1H), 1.67 – 1.59 (m, 3H), 1.55 (d,  $J$  = 2.8 Hz, 1H), 1.52 – 1.44 (m, 2H), 0.94 – 0.92 (m, 3H);  **$^{13}\text{C}\{^1\text{H}\}$  NMR (101 MHz, Chloroform-*d*)**  $\delta$  220.6, 145.0, 139.3, 138.0, 136.6, 130.1, 127.7, 126.7, 126.6, 50.6, 48.0, 44.8, 37.9, 35.9, 31.6, 29.3, 26.3, 25.7, 21.7, 13.9; **IR  $\nu$  (neat,  $\text{cm}^{-1}$ )**: 2921, 2270, 1736, 1634, 1509, 1340, 1275, 969, 820, 749; **HRMS (ESI,  $m/z$ )**: calcd for  $\text{C}_{20}\text{H}_{24}\text{NO}_3^+$   $[\text{M}+\text{H}]^+$ : 326.1751; found: 326.1738.

## V. 100 mmol Scale of Chloronitration of Alkenes

To a 250 mL dry flask were added alkene (**1b**, **1c** or **1l**; 100 mmol), **2** (18.3 g, 150



mmol), TMSCl (33 mL, 300 mmol), CuSO<sub>4</sub>•5H<sub>2</sub>O (2.5 g, 10 mmol) and MeCN (100 mL) at 0 °C under N<sub>2</sub> atmosphere. The solution was stirred for 2 h at 0 °C first and then warmed to room temperature as monitoring by TLC. Upon completion, the reaction mixture was filtered. The filtrate was concentrated and purified by column chromatography via silica gel to give the desired product **3b** (17.21 g, 92.73 mmol, 92%); **3c** (14.70 g, 73.65 mmol, 74%); **3l** (21.86 g, 93.38 mmol, 93%).

#### 100 mmol Scale:

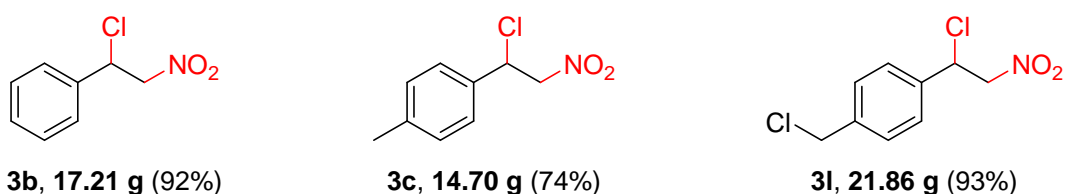

## VI. Sequential Further Transformations

#### Sequential Further Transformations:

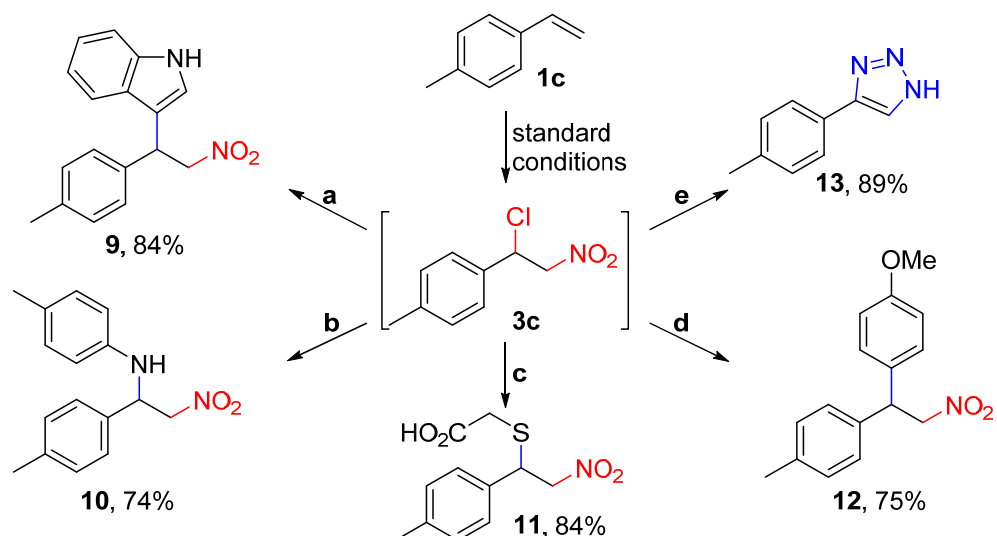

**Reaction conditions:** **a**) 1*H*-indole (2 equiv), Sc(OTf)<sub>3</sub> (2.5 mol %), H<sub>2</sub>O, rt. **b**) 4-methylaniline (1.5 equiv), Na<sub>2</sub>CO<sub>3</sub> (2 equiv), MeCN, rt. **c**) 2-mercaptoacetic acid (1.5 equiv), MeONa (3 equiv), MeOH, reflux. **d**) (4-methoxyphenyl)-magnesium bromide (2 equiv), THF, 50 °C. **e**) NaN<sub>3</sub> (4 equiv), DMF, rt. **Note:** Reported yields represent total isolated yields for two steps.

The reaction of **1c** with **2** was carried out according to general procedure (C). Upon completion, the mixture was filtered and then removed the solvent via vacuum to afford crude **3c**. **3c** was used directly to next step without further purification.

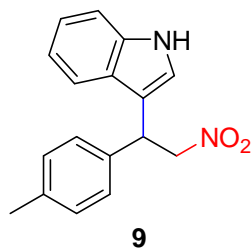

**3-(2-nitro-1-(p-tolyl)ethyl)-1H-indole (9)**<sup>18</sup>; 1H-indole (117 mg, 1.0 mmol), Sc(OTf)<sub>3</sub> (6.1 mg, 0.0125 mmol) and H<sub>2</sub>O (1 mL) was added to crude **3c**, and stirred at room temperature for 36 h, monitored by TLC. Upon completion, extracted with ethyl acetate (3 mL) three times. Combined the organic layers, dried over with Na<sub>2</sub>SO<sub>4</sub>, concentrated the organic phase, and then purified by column chromatography on silica gel to give the desired product **9**; **TLC**:  $R_f$  = 0.1 (PE/EA=20 : 1, UV); brown oil; 84% yield (113 mg, 0.40 mmol); **<sup>1</sup>H NMR (400 MHz, Chloroform-*d*)**  $\delta$  8.07 (s, 1H), 7.45 (d,  $J$  = 8.0 Hz, 1H), 7.35 (d,  $J$  = 8.0 Hz, 1H), 7.22 (d,  $J$  = 7.8 Hz, 2H), 7.20 – 7.17 (m, 1H), 7.13 (d,  $J$  = 7.8 Hz, 2H), 7.08 (ddd,  $J$  = 8.0, 7.1, 1.0 Hz, 1H), 7.02 (d,  $J$  = 1.9 Hz, 1H), 5.16 (t,  $J$  = 8.0 Hz, 1H), 5.05 (dd,  $J$  = 12.4, 7.6 Hz, 1H), 4.92 (dd,  $J$  = 12.3, 8.4 Hz, 1H), 2.31 (s, 3H).

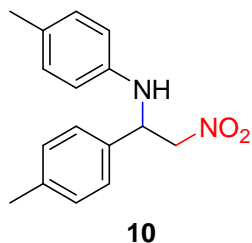

**4-methyl-N-(2-nitro-1-(p-tolyl)ethyl)aniline (10)**<sup>19</sup>; While **1c** was completed, the mixture was filtered, then 4-methylaniline (81 mg, 0.75 mmol) and Na<sub>2</sub>CO<sub>3</sub> (106 mg, 1.0 mmol) was added to the mixture, and stirred at room temperature for 10 h, monitored by TLC. Upon completion, concentrated and purified by column chromatography on silica gel to give the desired product **10**; **TLC**:  $R_f$  = 0.2 (PE/EA=20 : 1, UV); brown oil; 74% yield (100 mg, 0.37 mmol); **<sup>1</sup>H NMR (400 MHz, Chloroform-*d*)**  $\delta$  7.28 (d,  $J$  = 7.8 Hz, 2H), 7.17 (d,  $J$  = 7.8 Hz, 2H), 6.95 (d,  $J$  = 8.0 Hz, 2H), 6.54 (d,  $J$  = 8.0 Hz, 2H), 5.10 (t,  $J$  = 6.7 Hz, 1H), 4.71 – 4.65 (m, 2H), 4.22 (s, 1H), 2.33 (s, 3H), 2.21 (s, 3H).

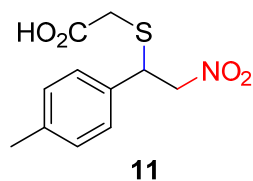

**2-((2-nitro-1-(p-tolyl)ethyl)thio)acetic acid (11)**; 2-mercaptoacetic acid (69 mg, 0.75 mmol) was added to MeONa (30 w.t.% in MeOH, 260  $\mu$ L, 1.5 mmol) in 3 mL MeOH and stirred at room temperature for 10 min, crude **3c** was added to the mixture. Then the mixture was warmed to 85  $^{\circ}$ C for 10 h, monitored by TLC. Upon completion, the reaction mixture was poured into crush ice, neutralized with 2N HCl (3 mL), extracted with DCM (10 mL) three times. Combined the organic layers, dried over with  $\text{Na}_2\text{SO}_4$ , concentrated the organic phase, and then purified by column chromatography on silica gel to give the desired product **11**; **TLC**:  $R_f = 0.1$  (PE/EA=3 : 1, UV); gray solid (m.p.:87.4-88.7  $^{\circ}$ C); 84% yield (107 mg, 0.42 mmol);  **$^1\text{H}$  NMR (400 MHz, Chloroform-*d*)**  $\delta$  8.70 (brs, 1H), 7.26 – 7.22 (d,  $J = 7.9$  Hz, 2H), 7.18 (d,  $J = 7.9$  Hz, 2H), 4.90 – 4.74 (m, 3H), 3.18 (d,  $J = 15.5$  Hz, 1H), 3.08 (d,  $J = 15.5$  Hz, 1H), 2.34 (s, 3H);  **$^{13}\text{C}\{^1\text{H}\}$  NMR (101 MHz, Chloroform-*d*)**  $\delta$  175.9, 139.0, 132.7, 130.0, 128.0, 78.7, 32.5, 21.3; **IR  $\nu$  (neat,  $\text{cm}^{-1}$ )**: 3443, 2989, 2706, 2318, 1636, 1556, 1462, 1376, 1260, 1192, 897, 753, 706; **HRMS (ESI,  $m/z$ )**: calcd for  $\text{C}_{11}\text{H}_{14}\text{NO}_4\text{S}^+$   $[\text{M}+\text{H}]^+$ : 256.0638; found: 256.0607.

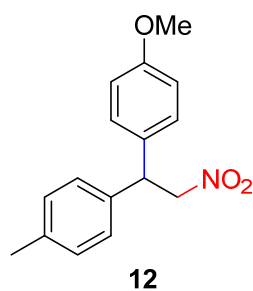

**1-methoxy-4-(2-nitro-1-(p-tolyl)ethyl)benzene (12)**; (4-methoxyphenyl)-magnesium bromide (1.0 M in THF, 1 mL, 1.0 mmol) and THF (3 mL) was added to crude **3c** under  $\text{N}_2$  atmosphere at 0  $^{\circ}$ C, and stirred at room temperature for 24 h, monitored by TLC. Upon completion, the mixture was quenched with saturated  $\text{NH}_4\text{Cl}$  (5 mL), extracted with EA (5 mL) three times. Combined the organic layers, dried over with  $\text{Na}_2\text{SO}_4$ , concentrated the organic phase, and then purified by column chromatography

on silica gel to give the desired product **12**; **TLC**:  $R_f = 0.1$  (PE/EA=20 : 1, UV); yellow oil; 75% yield (102 mg, 0.38 mmol);  **$^1\text{H}$  NMR (400 MHz, Chloroform-*d*)**  $\delta$  7.21 – 7.01 (m, 6H), 6.85 (d,  $J = 8.4$  Hz, 2H), 4.93 (d,  $J = 9.0$  Hz, 2H), 4.83 (d,  $J = 8.2$  Hz, 1H), 3.77 (s, 3H), 2.31 (s, 3H);  **$^{13}\text{C}\{^1\text{H}\}$  NMR (101 MHz, Chloroform-*d*)**  $\delta$  159.0, 137.3, 136.6, 131.6, 129.8, 128.8, 127.5, 114.5, 79.7, 55.4, 48.0, 21.2; **IR  $\nu$  (neat,  $\text{cm}^{-1}$ )**: 3005, 2985, 1609, 1552, 1464, 1375, 1275, 1031, 913, 803, 749, 572; **HRMS (ESI,  $m/z$ )**: calcd for  $\text{C}_{16}\text{H}_{18}\text{NO}_3^+$  [ $\text{M}+\text{H}$ ] $^+$ : 272.1281; found: 272.1248.

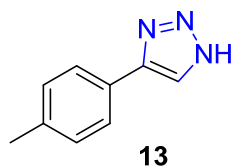

**4-(*p*-tolyl)-1H-1,2,3-triazole (**13**)**<sup>20</sup>;  $\text{NaN}_3$  (130 mg, 2.0 mmol) and DMF (5 mL) was added to crude **3c**, and stirred at room temperature for 8 h, monitored by TLC. Upon completion, The mixture was diluted by saturated  $\text{NaHCO}_3$  (15 mL), extracted with  $\text{Et}_2\text{O}$  (10 mL) three times. Combined the organic layers, dried over with  $\text{Na}_2\text{SO}_4$ , concentrated the organic phase, and then purified by column chromatography on silica gel to give the desired product **13**; **TLC**:  $R_f = 0.3$  (PE/EA=5 : 1, UV); white solid; 89% yield (71 mg, 0.47 mmol);  **$^1\text{H}$  NMR (400 MHz, Chloroform-*d*)**  $\delta$  7.95 (s, 1H), 7.71 (d,  $J = 8.2$  Hz, 2H), 7.28 (d,  $J = 8.2$  Hz, 2H), 2.40 (s, 3H).

## VII. Substrate Limitation

Impure products:

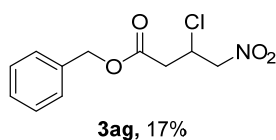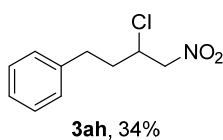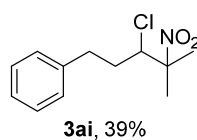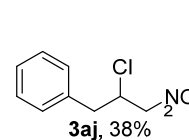

Impure products was detected by NMR:



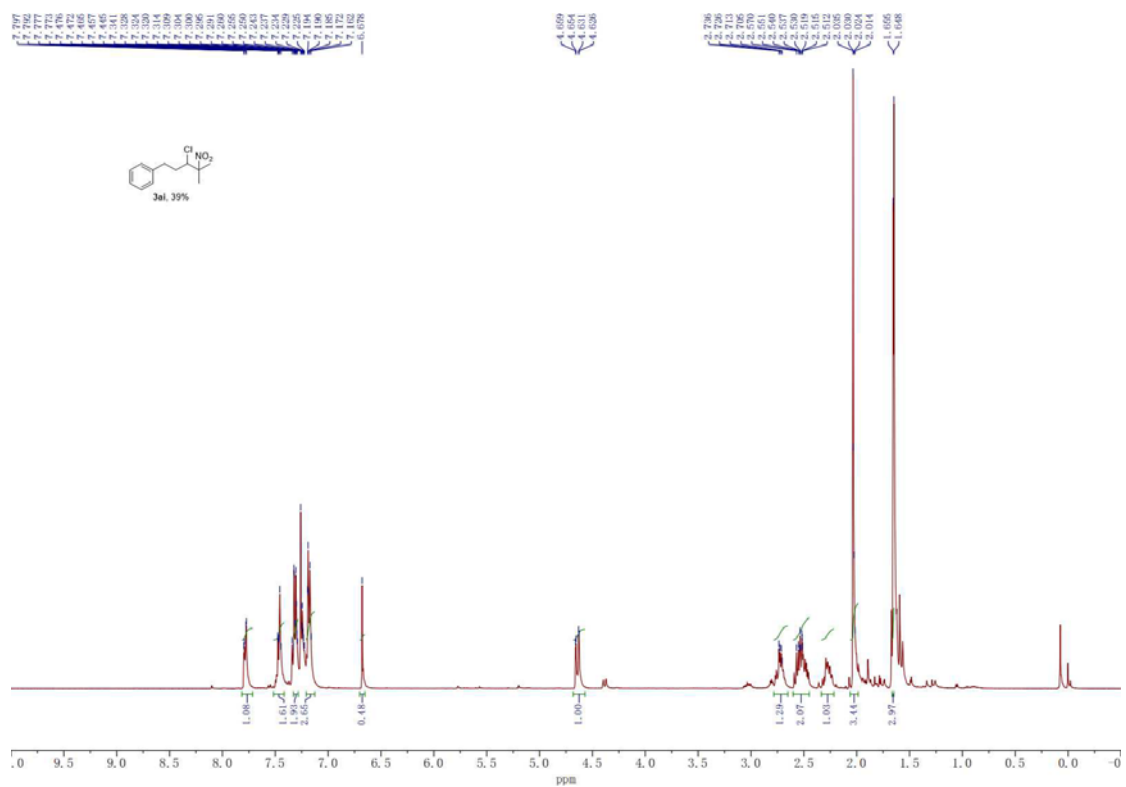

**Figure S3.** <sup>1</sup>H NMR spectra of **3ai** in CDCl<sub>3</sub>

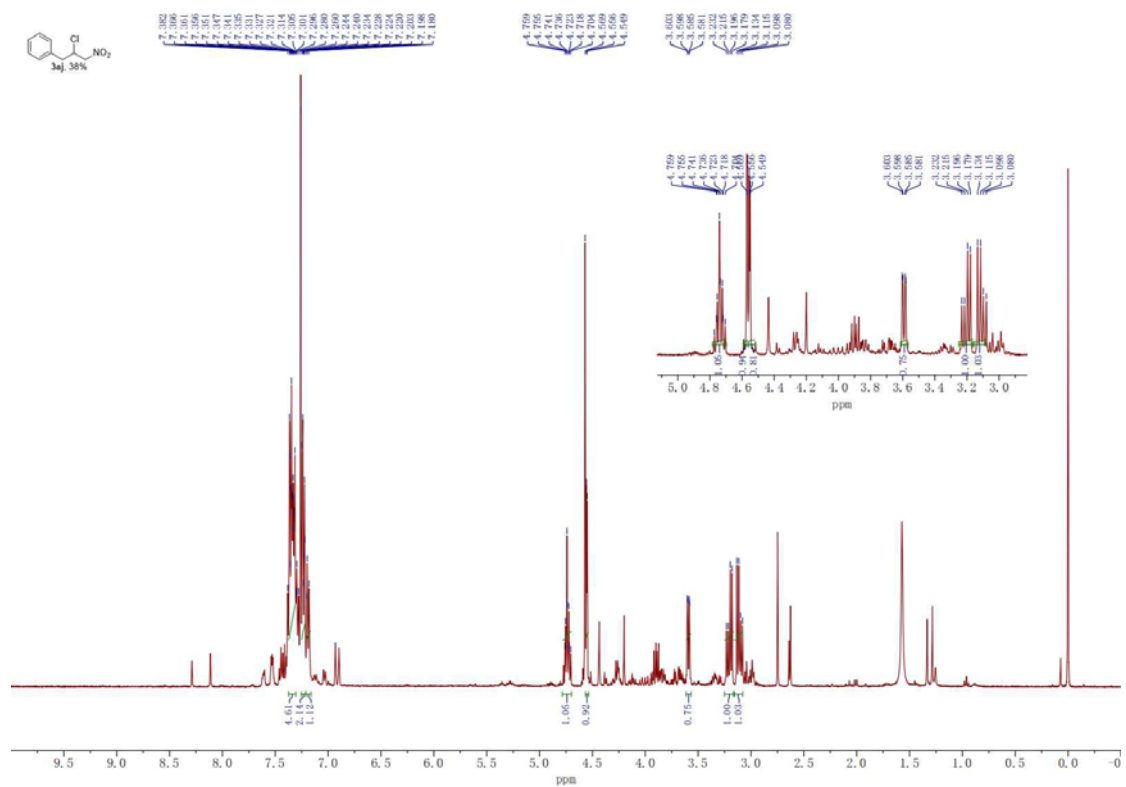

**Figure S4.** <sup>1</sup>H NMR spectra of **3aj** in CDCl<sub>3</sub>

□

### Decomposed substrates:

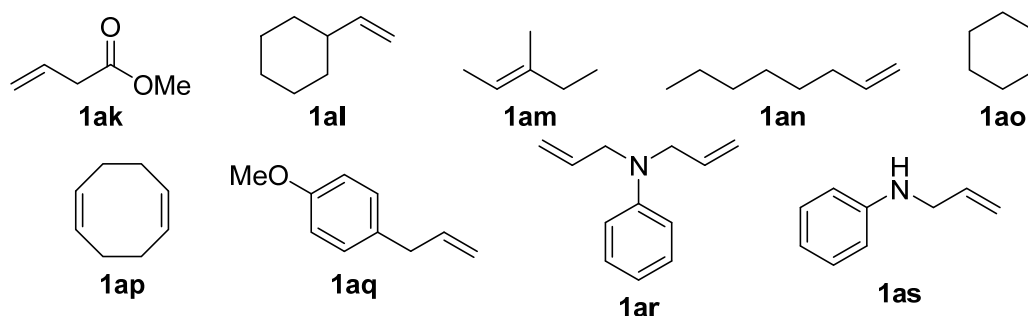

### VIII. Control Experiments

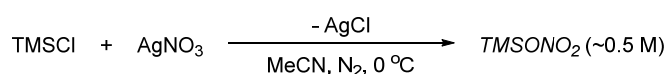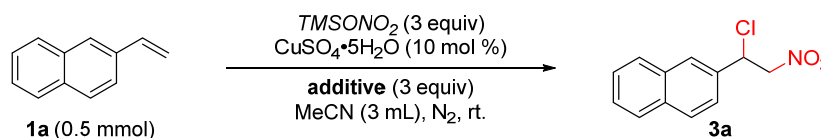

| additive: | No    | TMSCl                | LiCl                 | TMSCN             | CsF               | TBAF <sup>b</sup> |
|-----------|-------|----------------------|----------------------|-------------------|-------------------|-------------------|
| results:  | trace | 3a, 83% <sup>a</sup> | 3a, 81% <sup>a</sup> | N.R. <sup>c</sup> | N.R. <sup>c</sup> | N.R. <sup>c</sup> |

<sup>a</sup> The yield was determined with <sup>1</sup>H NMR by adding 1,2-dichloroethane as an internal standard. <sup>b</sup> TBAF = Tetrabutylammonium fluoride. <sup>c</sup> The reaction did not work and only starting materials were detected by <sup>1</sup>H NMR.

*First step:* To a 50 mL dry flask equipped with a stir bar was added AgNO<sub>3</sub> (1.019 g, 6.0 mmol), MeCN (10 mL) and TMSCl (543 mg, 5.0 mmol) at 0 °C under N<sub>2</sub> atmosphere. The mixture was stirred for 1 h at 0 °C to obtain TMSONO<sub>2</sub> (~0.5 M in MeCN).

*Second step:* To a 10 mL dry flask equipped with a stir bar was added **1a** (77 mg, 0.50 mmol), additive (1.5 mmol; TMSCl, LiCl, TMSCN, CsF, TBAF or without additive) and CuSO<sub>4</sub>·5H<sub>2</sub>O (12.5 mg, 0.05 mmol) under N<sub>2</sub> atmosphere, TMSONO<sub>2</sub> (1.5 mmol, 3 mL) was added via syringe. The mixture was stirred at room temperature and monitored by TLC. Upon completion, the reaction mixture was concentrated and fast column chromatography via silica gel, eluted with DCM (60 mL) to give the crude product. The crude product was dissolved with CDCl<sub>3</sub>, 1,2-dichloroethane (49.5 mg, 0.50 mmol) was added to the solution as an internal standard. Then the sample was detected and analyzed via <sup>1</sup>H NMR.

## IX. Raman Spectra

The Raman spectra at 25 °C were taken with a Jobin Yvon confocal laser Raman system (SuperLabRam II), which was equipped with a He–Ne laser at 632.8 nm with a power of approximately 5 mW.

### Raman Analysis

I. MeCN (3 mL)

II. MeCN (3 mL) + AgNO<sub>3</sub> (1 mmol)

III. MeCN (3 mL) + **2** (1 mmol)

IV. MeCN (3 mL) + TMSCl (1 mmol)

V. MeCN (3 mL) + AgNO<sub>3</sub> (1.2 mmol) + TMSCl (1 mmol)

VI. MeCN (3 mL) + **1i** (0.5 mmol)

VII. MeCN (3 mL) + **2** (0.75 mmol) + TMSCl (1.5 mmol)  
+ **1i** (0.5 mmol) + CuSO<sub>4</sub>•5H<sub>2</sub>O (0.05 mmol)

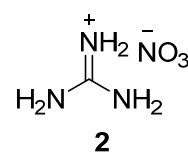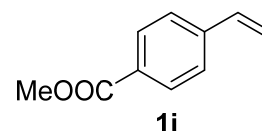

Under N<sub>2</sub> atmosphere, to seven 10 mL dry flasks equipped with a stir bar was separately added MeCN (3 mL) (No.**I**); MeCN (3 mL) and AgNO<sub>3</sub> (167 mg, 1 mmol) (No.**II**); MeCN (3 mL) and **2** (122 mg, 1 mmol) (No.**III**); MeCN (3 mL) and TMSCl (108.6 mg, 1 mmol) (No.**IV**); MeCN (3 mL), AgNO<sub>3</sub> (204 mg, 1.2 mmol) and TMSCl (108.6 mg, 1 mmol) (No.**V**); MeCN (3 mL) and **1i** (81 mg, 0.5 mmol) (No.**VI**); MeCN (3 mL), **2** (91.5 mg, 0.75 mmol), TMSCl (163 mg, 1.5 mmol), **1i** (81 mg, 0.5 mmol) and CuSO<sub>4</sub>•5H<sub>2</sub>O (12.5 mg, 0.05 mmol) (No.**VII**). All of the reactions were stirred at 0 °C for 2 h. Then the samples were taken from each flask and were separately detected by Raman.



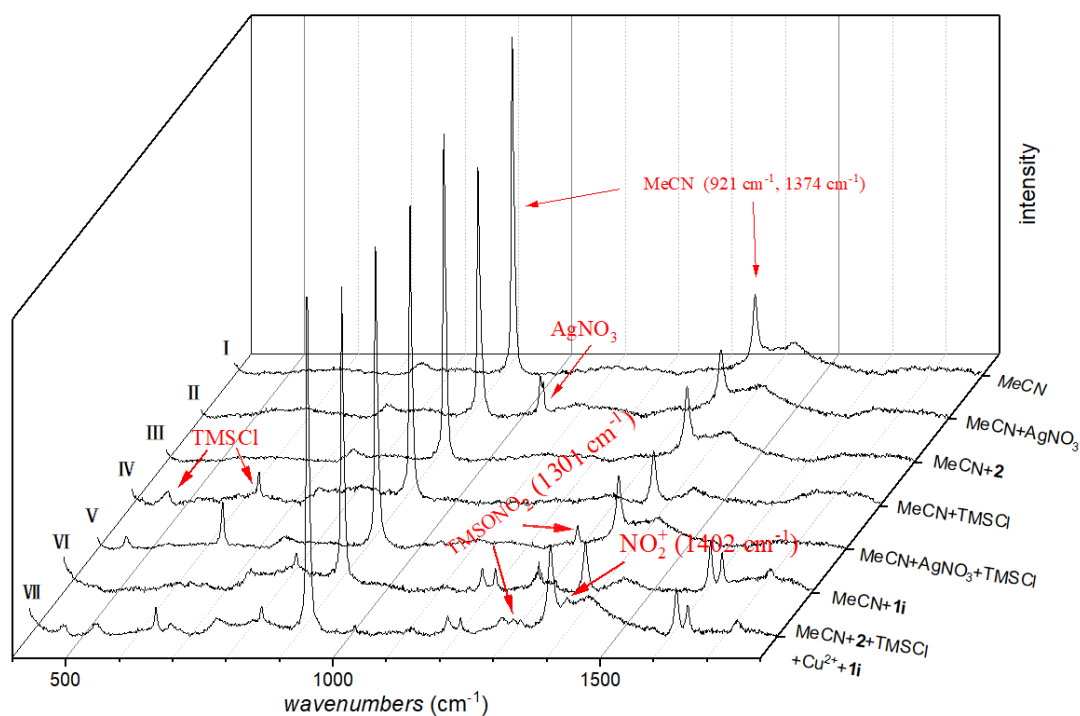

**Figure S5.** Raman spectra for I-VII

**Discussion of Figure S5:** As shown in Figure S5, the peaks at 921 and 1374  $\text{cm}^{-1}$  can be assigned to the Raman signals of MeCN.<sup>5</sup> In No.V, the reaction of TMSCl with  $\text{AgNO}_3$  could generate  $\text{TMSONO}_2$  in situ.<sup>21</sup> By comparing the signal of  $\text{AcONO}_2$  ( $1309 \text{ cm}^{-1}$ ),<sup>22</sup> it is reasonable that the new band at  $1301 \text{ cm}^{-1}$  in the spectrum of No. V possibly belongs to  $\text{TMSONO}_2$ . The band at  $1301 \text{ cm}^{-1}$  also appears in the spectrum of No. VII, suggesting that  $\text{TMSONO}_2$  is probably the intermediate of the reaction. Note that a weak band of  $\text{NO}_2^+$  ( $1402 \text{ cm}^{-1}$ )<sup>22-24</sup> was also observed (Figure S1. No.VII), which indicated that  $\text{NO}_2^+$  was formed during the reaction and  $\text{NO}_2^+$  may be the active species for this reaction.

## X. NMR Monitoring Experiments

To over dried NMR tube was added **2** (18.3 mg, 0.15 mmol),  $\text{CuSO}_4 \cdot 5\text{H}_2\text{O}$  (2.5 mg, 0.01 mmol), styrene derivative (0.10 mmol; *p*-Me, *p*-H, *p*-AcO, *p*-CN or *p*- $\text{NO}_2$ ), TMSCl (32.6 mg, 0.3 mmol), DCE (9.9 mg, 0.10 mmol, as an internal standard) and

CD<sub>3</sub>CN (0.5 mL) under N<sub>2</sub> atmosphere. And then this tube was placed ice bath for 1 h firstly and then was allowed to warm to room temperature. The sample was detected by <sup>1</sup>H NMR per 15 min or 30 min. The concentration of product **3** was measured by monitoring the appearance of product **3** signals on <sup>1</sup>H NMR, which was normalized against the internal standard peak (DCE). The data shown in Figure S6 indicated that the substrates bearing electron-withdrawing groups (NO<sub>2</sub>, CN, OAc) reacted more rapidly than the styrene with electron-donating group (Me).

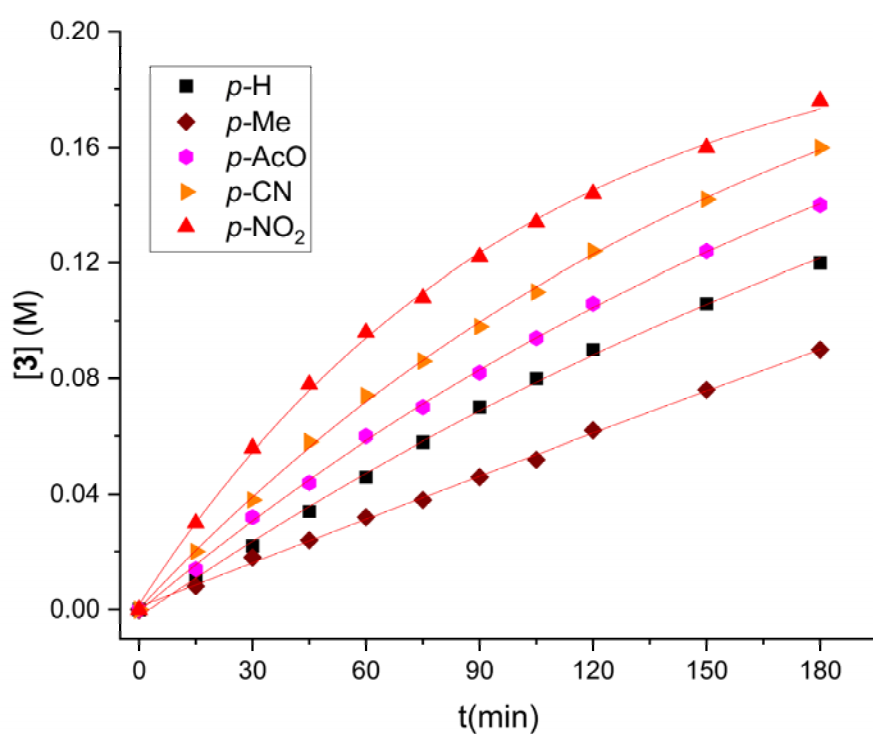

**Figure S6.** Relative rate comparison determined by <sup>1</sup>H NMR

In addition, during the reaction, we detected the generation of TMSOTMS by <sup>1</sup>H NMR (Figure S7), which demonstrated that TMSOTMS was a by-product of this reaction.

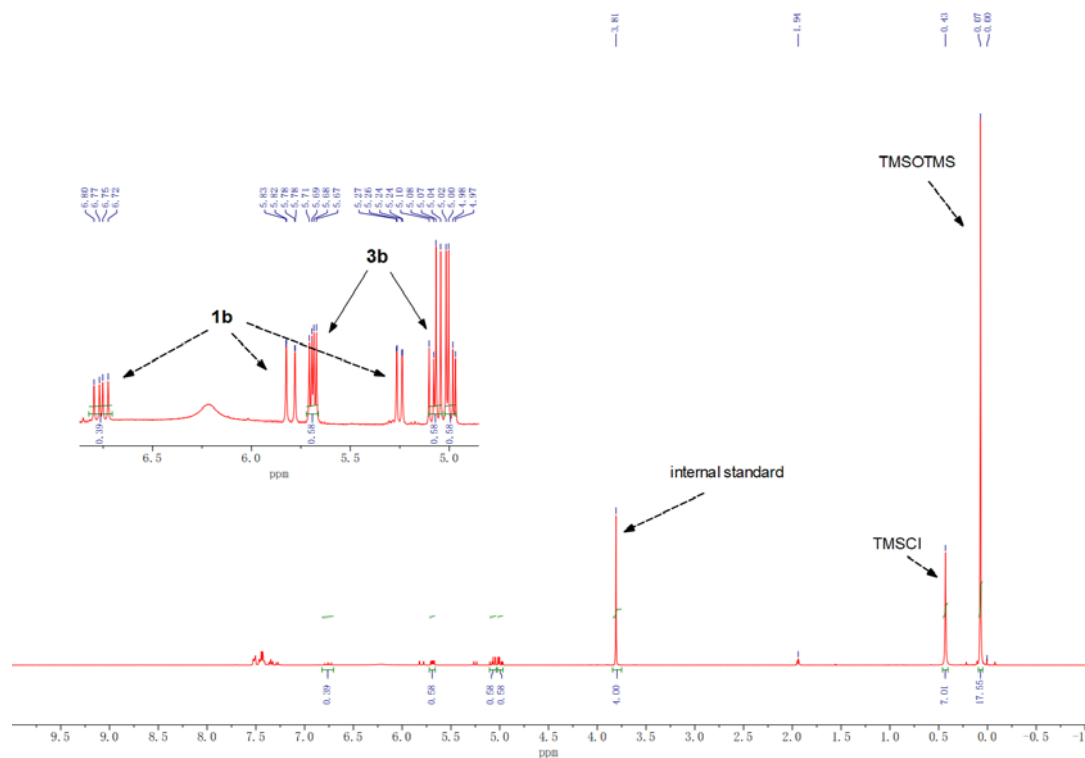

**Figure S7.**  $^1\text{H}$  NMR spectra of **3b** in  $\text{CD}_3\text{CN}$  at 180 min by adding 1,2-dichloroethane as an internal standard

**XI.  $^1\text{H}$ - $^1\text{H}$  NOE spectrum of **3ac****

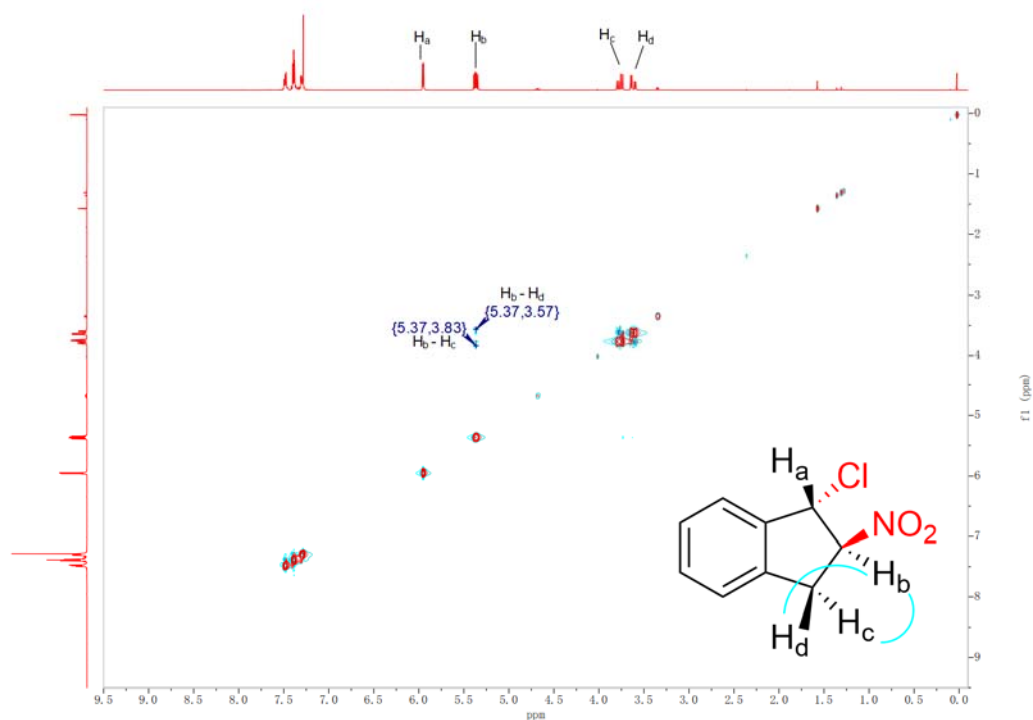

**Figure S8.**  $^1\text{H}$ - $^1\text{H}$  NOE spectrum of **3ac** in  $\text{CDCl}_3$  at 25 °C, recorded at 400 MHz

## XII. References

1. Zhou, S.; Song, T.; Chen, H.; Liu, Z.; Shen, H.; Li, C., *Org. Lett.* **2017**, *19*, 698-701.
2. Xiao, Q.; He, Q.; Li, J.; Wang, J., *Org. Lett.* **2015**, *17*, 6090-6093.
3. Molander, G. A.; Brown, A. R., *J. Org. Chem.* **2006**, *71*, 9681-9686.
4. Duan, Y.; Lin, J.-H.; Xiao, J.-C.; Gu, Y.-C., *Org. Lett.* **2016**, *18*, 2471-2474.
5. Dou, Z.; Wang, Y.; Fang, W.; Sun, C.; Men, Z., *Journal of Molecular Liquids* **2020**, *312*, 113392.
6. Taniguchi, T.; Fujii, T.; Ishibashi, H., *J. Org. Chem.* **2010**, *75*, 8126-8132.
7. Canestrari, D.; Lancianesi, S.; Badiola, E.; Strinna, C.; Ibrahim, H.; Adamo, M. F. A., *Org. Lett.* **2017**, *19*, 918-921.
8. Fukunaga, K.; Okamoto, A.; Kimura, M., *Chem. Soc. Jap.* **1983**, 542-550.
9. Gao, M.; Xu, B., *Org. Lett.* **2016**, *18*, 4746-4749.
10. Maity, S.; Manna, S.; Rana, S.; Naveen, T.; Mallick, A.; Maiti, D., *J. Am. Chem. Soc.* **2013**, *135*, 3355-3358.
11. Ambala, S.; Singh, R.; Singh, M.; Cham, P. S.; Gupta, R.; Munagala, G.; Yempalla, K. R.; Vishwakarma, R. A.; Singh, P. P., *RSC Adv.* **2019**, *9*, 30428-30431.
12. Roshandel, S.; Gurung, L.; Mathew, T.; Prakash, G. K. S., *Tetra. Lett.* **2017**, *58*, 2842-2845.
13. Maity, S.; Naveen, T.; Sharma, U.; Maiti, D., *Org. Lett.* **2013**, *15*, 3384-3387.
14. Zhang, K.; Jelier, B.; Passera, A.; Jeschke, G.; Katayev, D., *Chem.* **2019**, *25*, 12929-12939.
15. Yu, S.-W.; Zhao, S.-H.; Chen, H.; Xu, X.-Y.; Yuan, W.-C.; Zhang, X.-M., *ChemistrySelect* **2018**, *3*, 4827-4830.
16. Vidal-Albalat, A.; Swiderek, K.; Izquierdo, J.; Rodriguez, S.; Moliner, V.; Gonzalez, F. V., *Chem. Commun.* **2016**, *52*, 10060-3.
17. Hwu, J. R.; Chen, K.-L.; Ananthan, S.; Patel, H. V., *Organometallics* **1996**, *15*, 499-505.
18. Chiu, C.-C.; Chiu, H.-T.; Lee, D.-S.; Lu, T.-J., *RSC Adv.* **2018**, *8*, 26407-26415.
19. Yang, L.; Xia, C.; Huang, H., *Chin. J. Catal.* **2011**, *32*, 1573-1576.
20. Sharma, P.; Kumar, N.; Senwar, K.; Forero-Doria, O.; Nachtigall, F.; Santos, L.; Shankaraiah, N., *J. Braz. Chem. Soc.* **2017**, *28*, 589-597.
21. Prakash, G. K. S.; Panja, C.; Mathew, T.; Surampudi, V.; Petasis, N. A.; Olah, G. A., *Org. Lett.* **2004**, *6*, 2205-2207.
22. Zelenov, V. P.; Bukalov, S. S.; Subbotin, A. N., *Mendeleev Commun.* **2017**, *27*, 355-356.
23. Harrar, J. E.; Rigdon, L. P.; Rice, S. F., *J. Raman Spectrosc.* **1997**, *28*, 891-899.
24. Lippold, M.; Patzig-Klein, S.; Kroke, E., *Z. Naturforsch.* **2011**, *66*, 155-163.

### XIII. NMR Spectra of New Compounds (<sup>1</sup>H NMR, <sup>13</sup>C NMR, <sup>19</sup>F NMR)

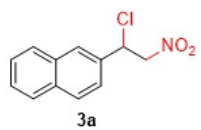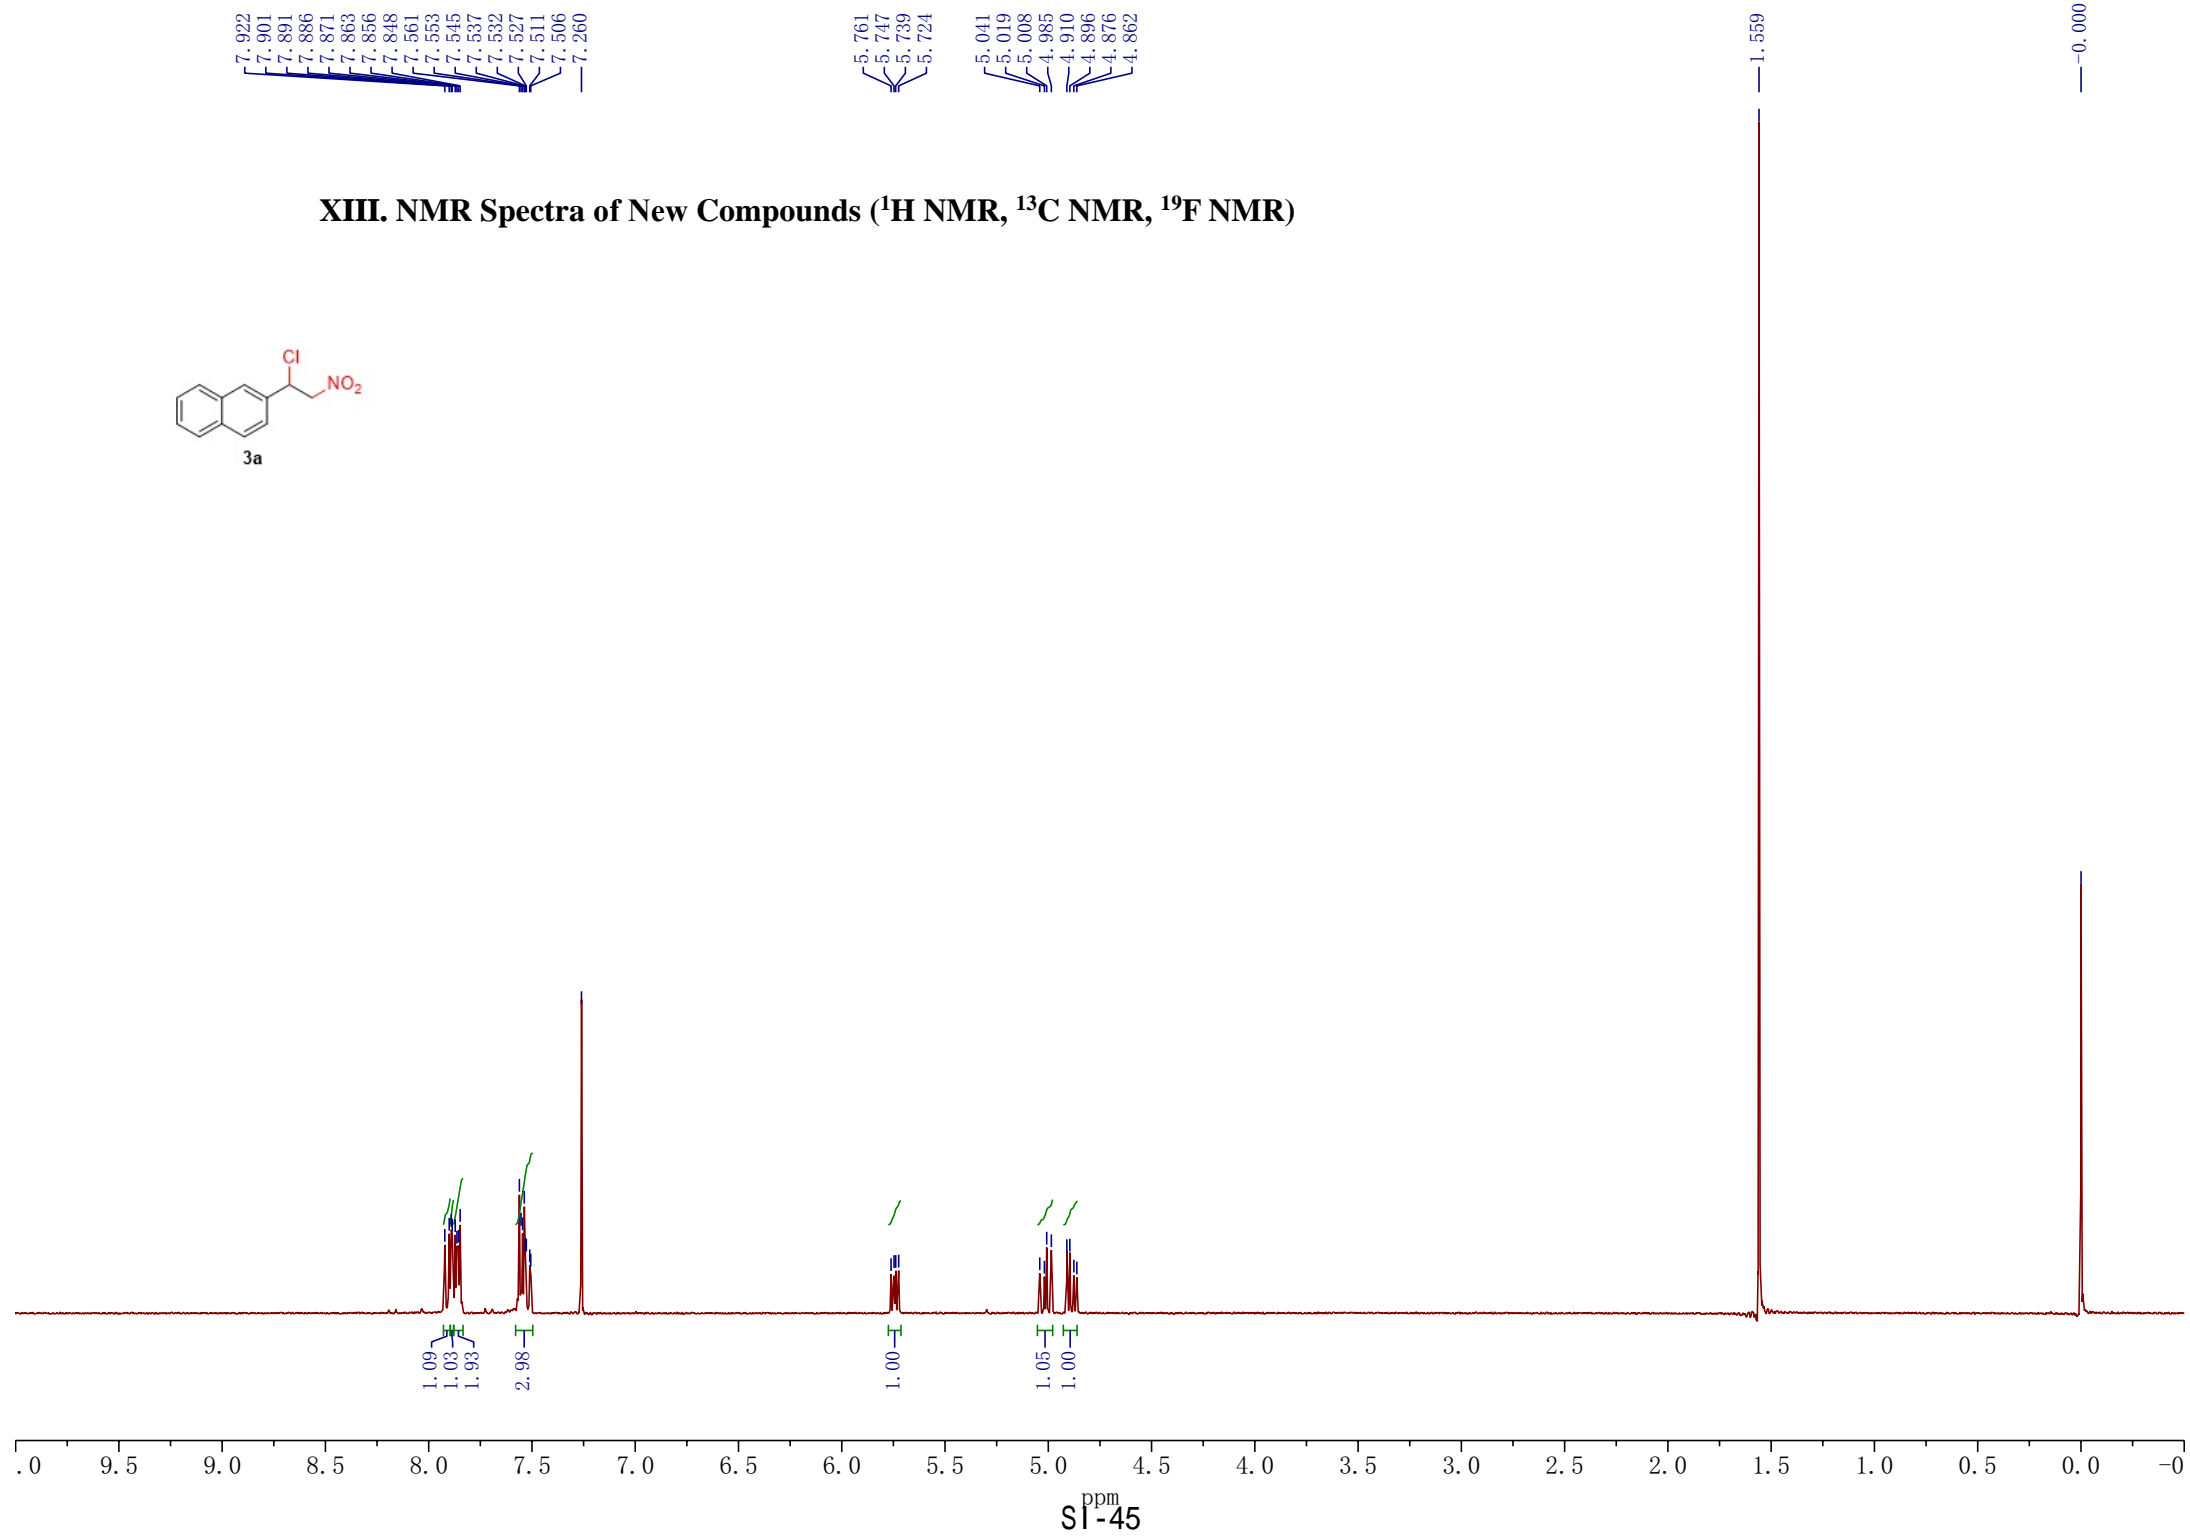

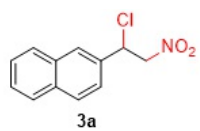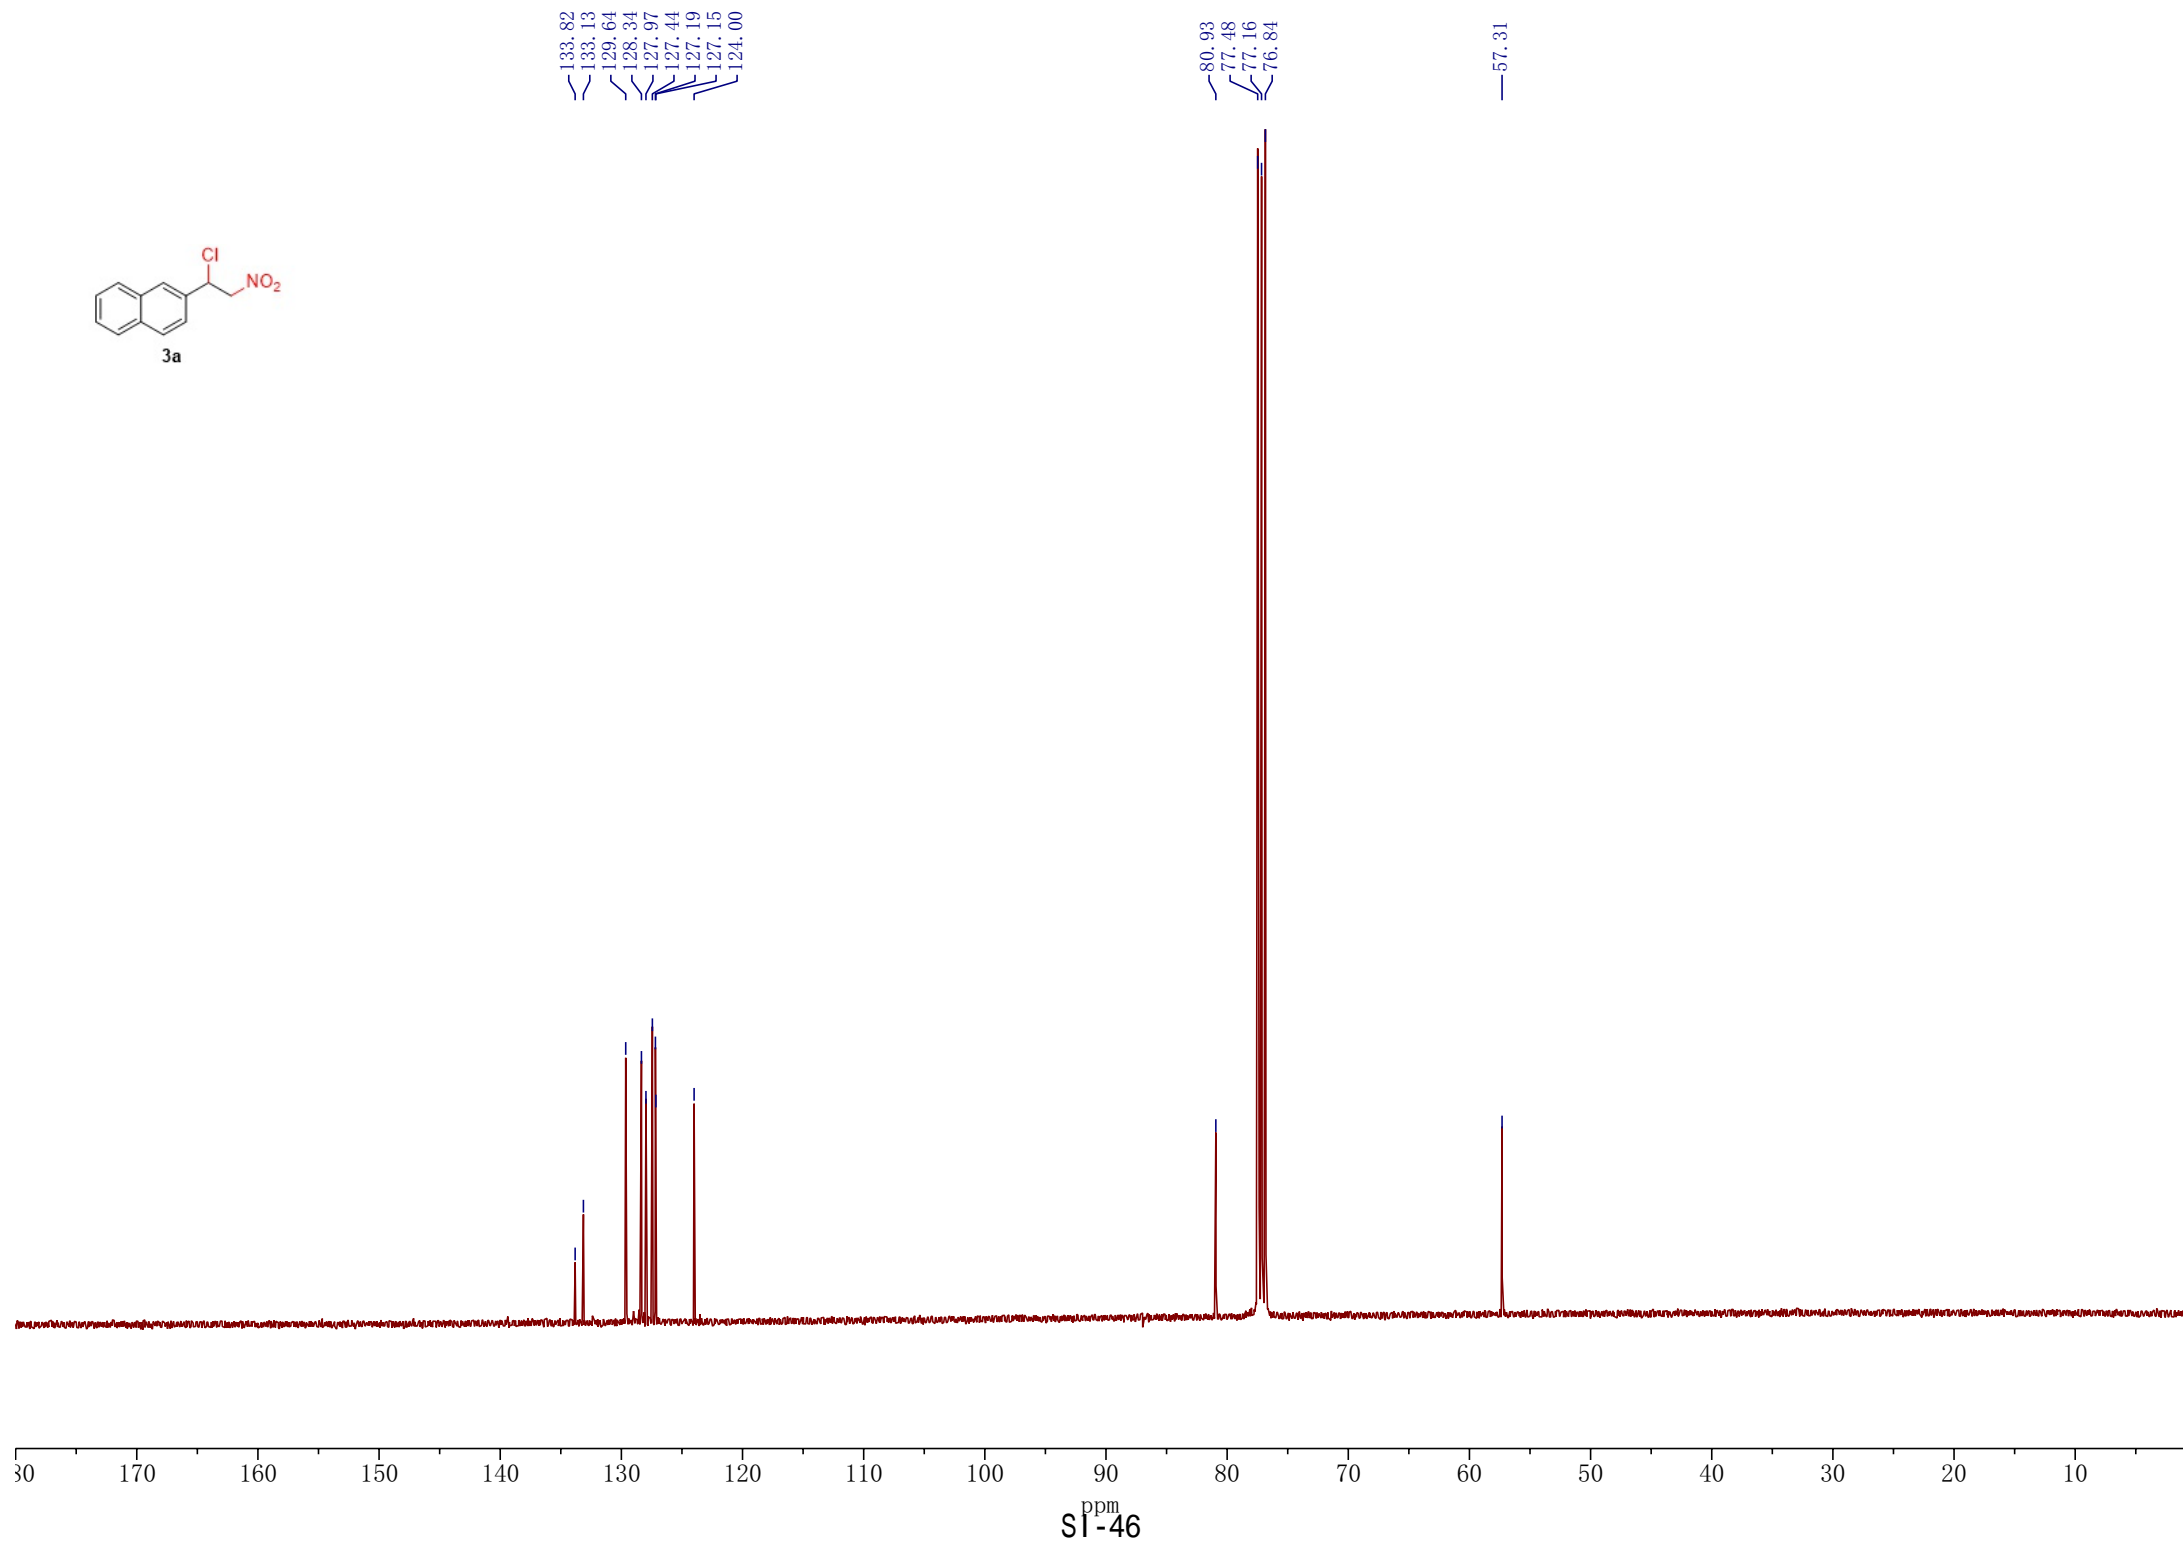

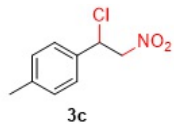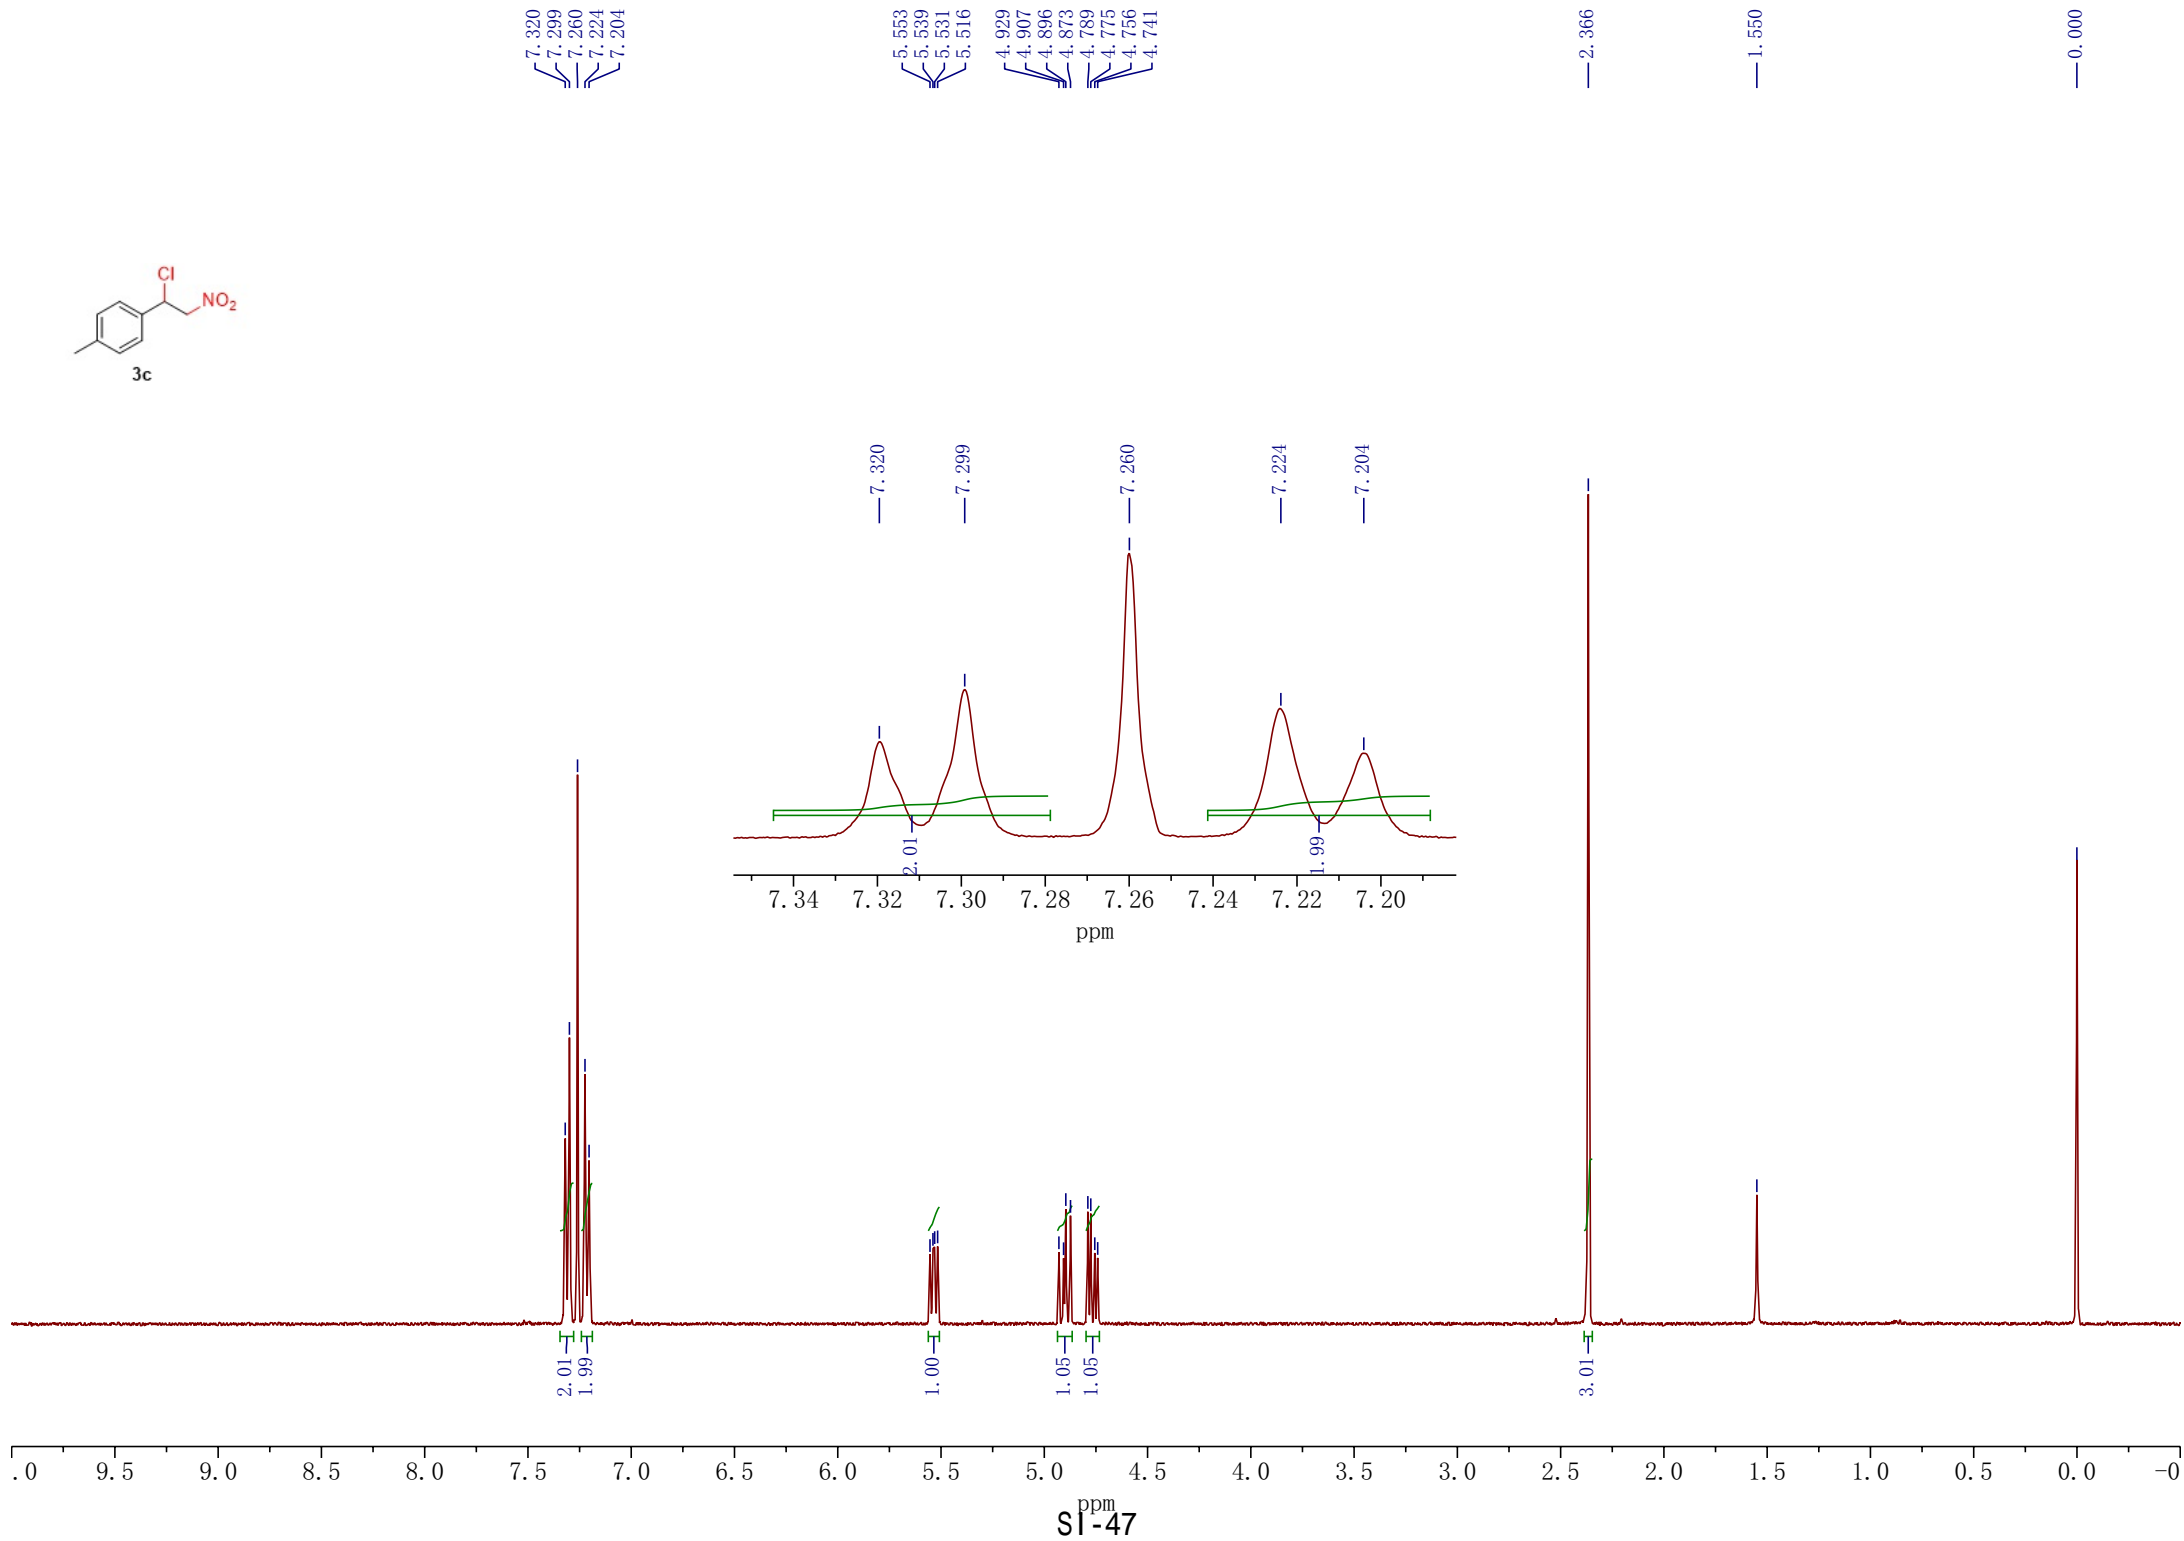

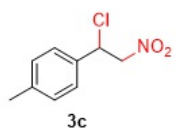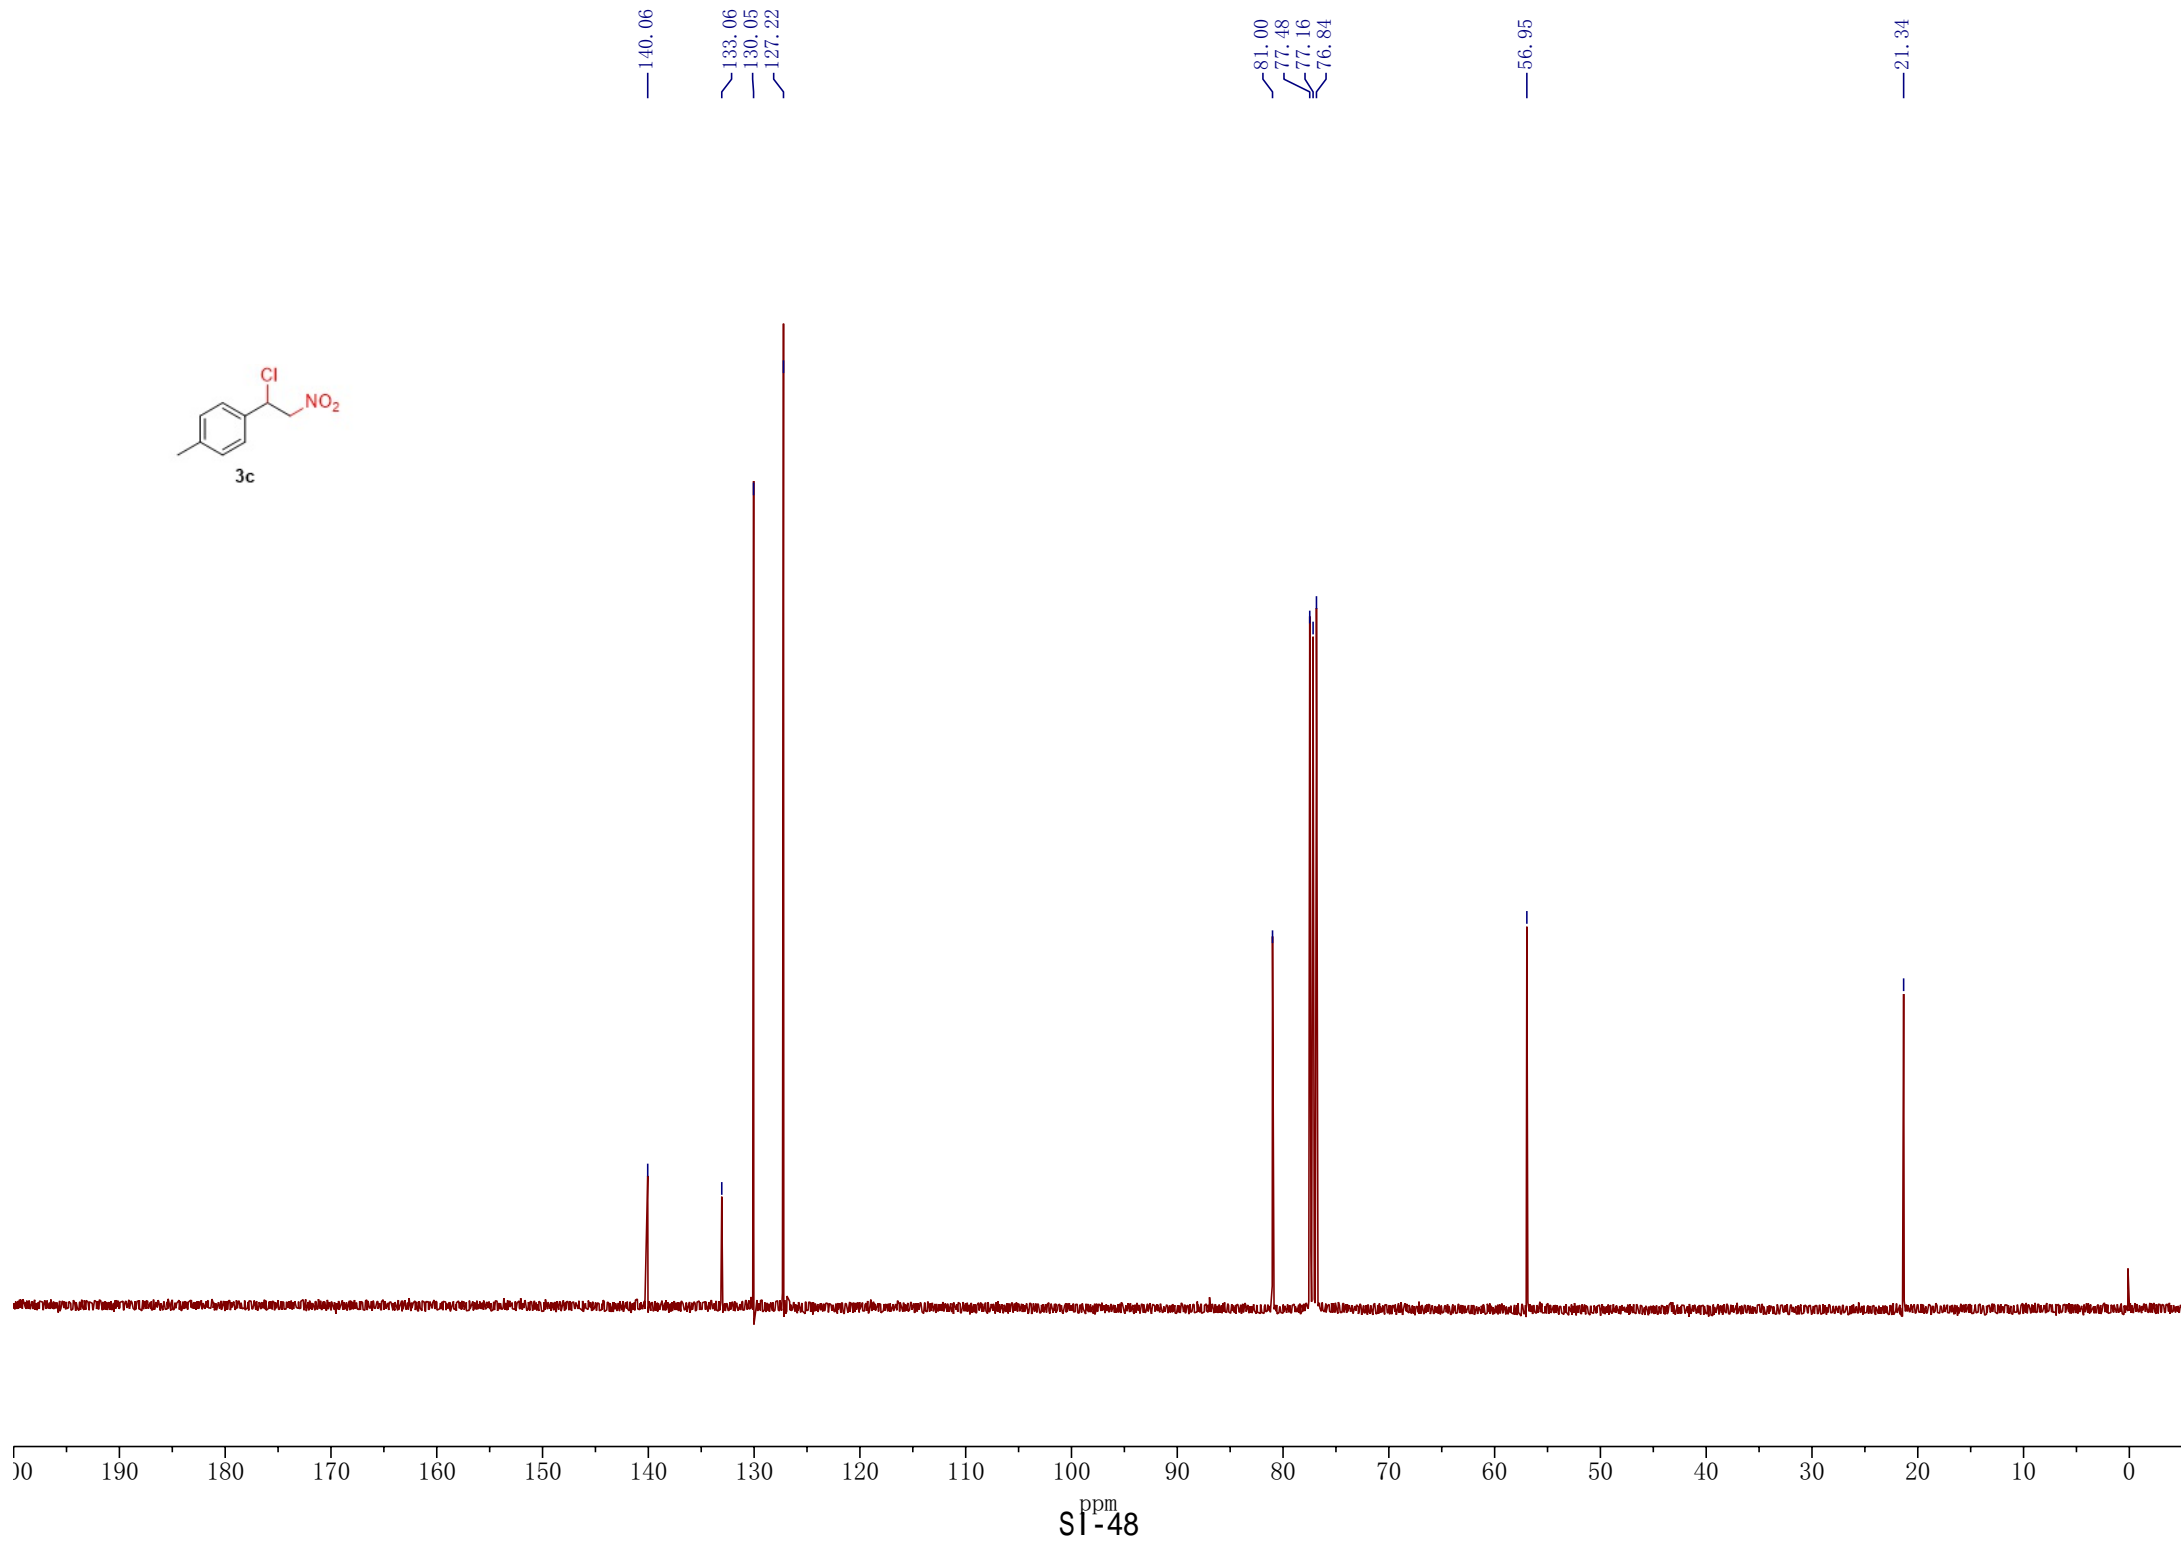



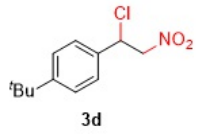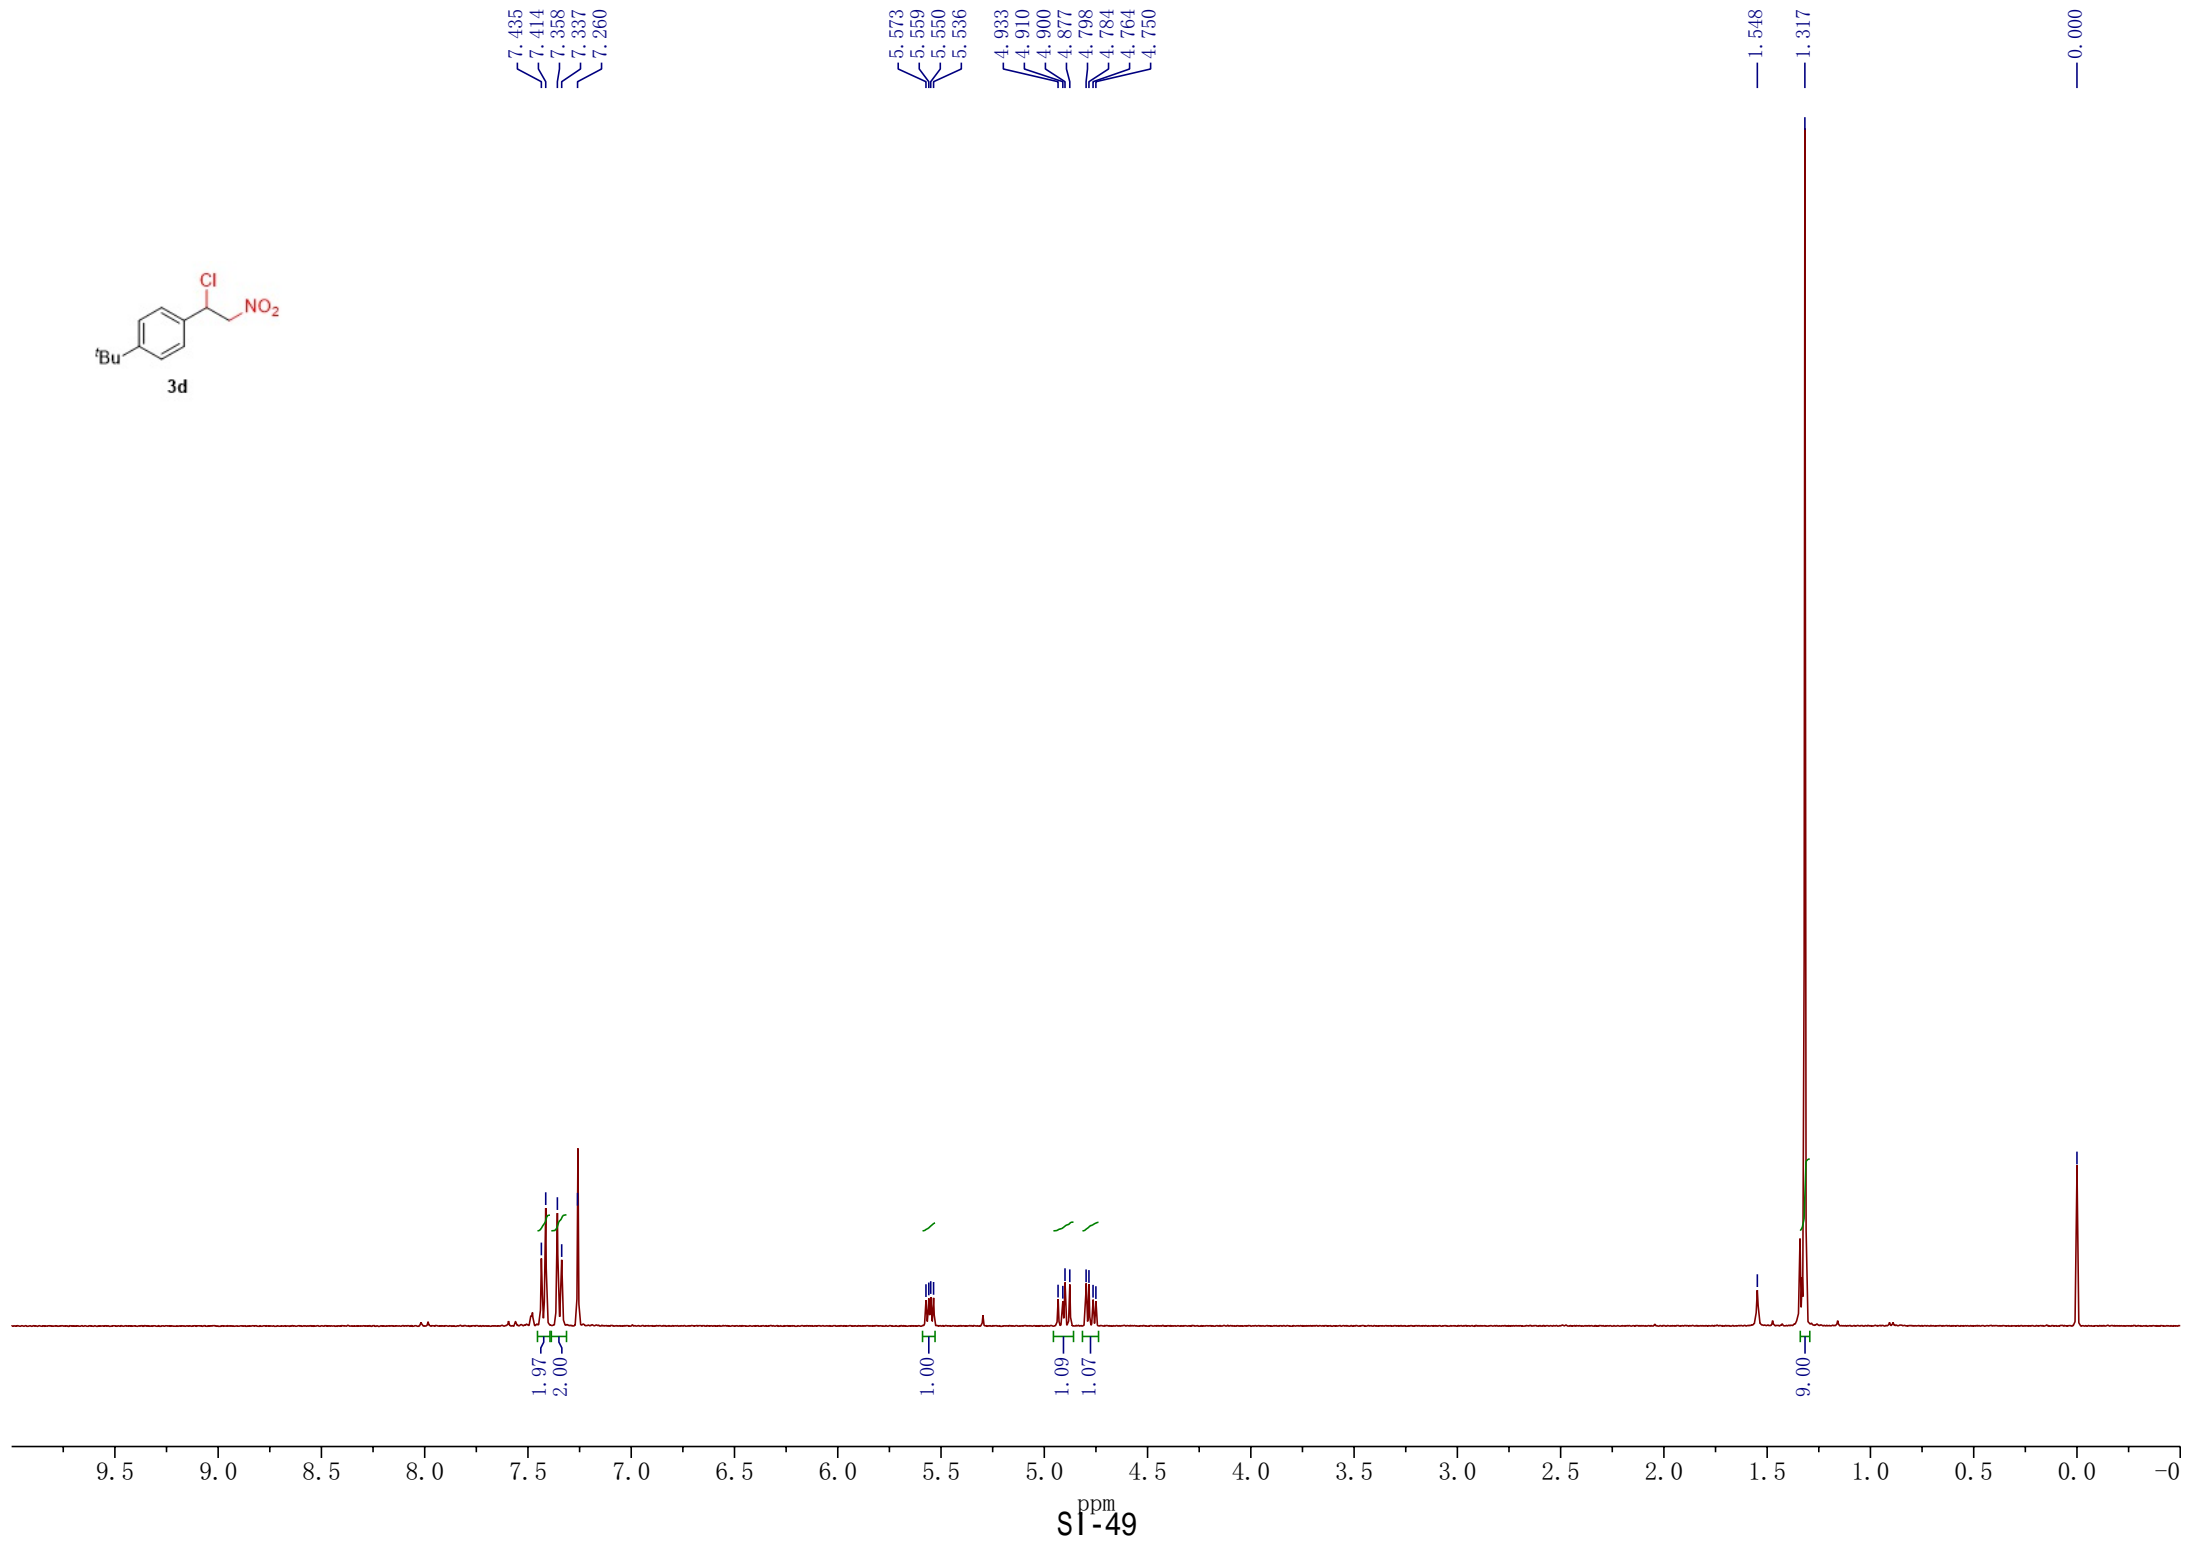

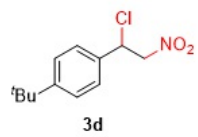

— 153.21

— 132.91

— 127.04

— 126.36

— 80.99

— 77.48

— 77.16

— 76.84

— 56.93

— 34.90

— 31.33

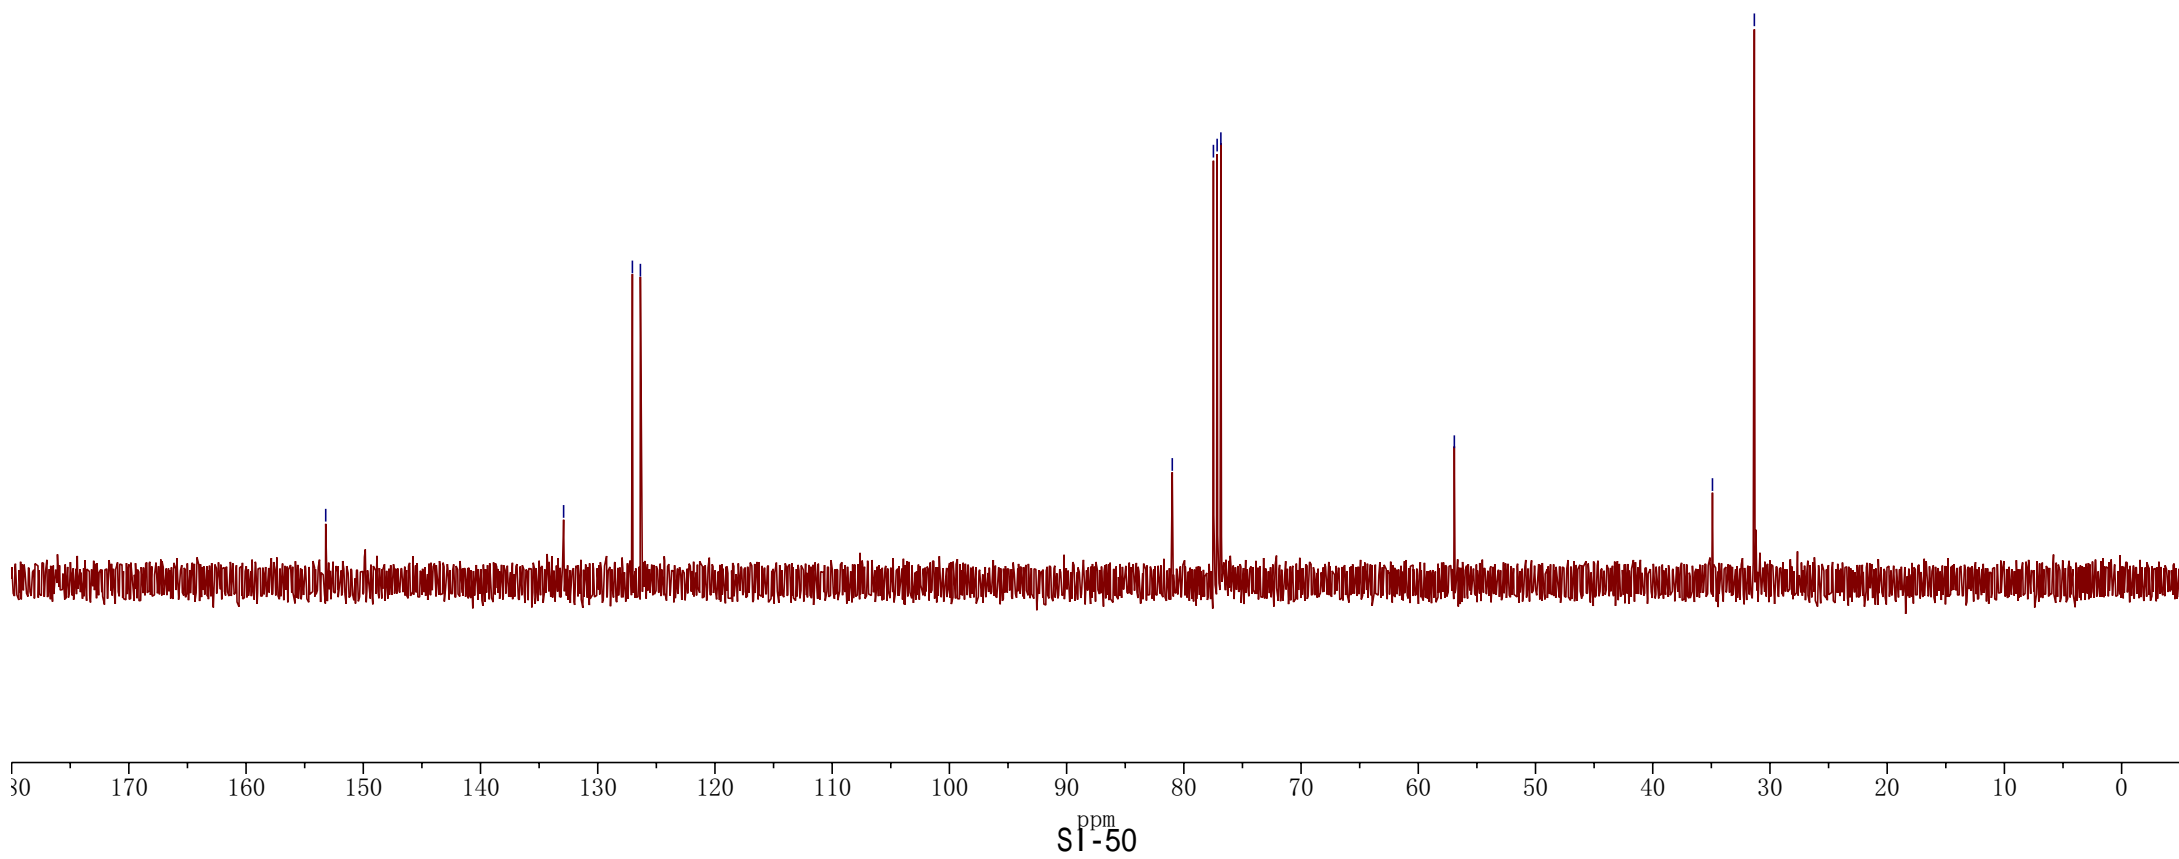

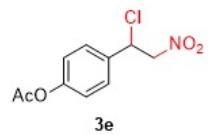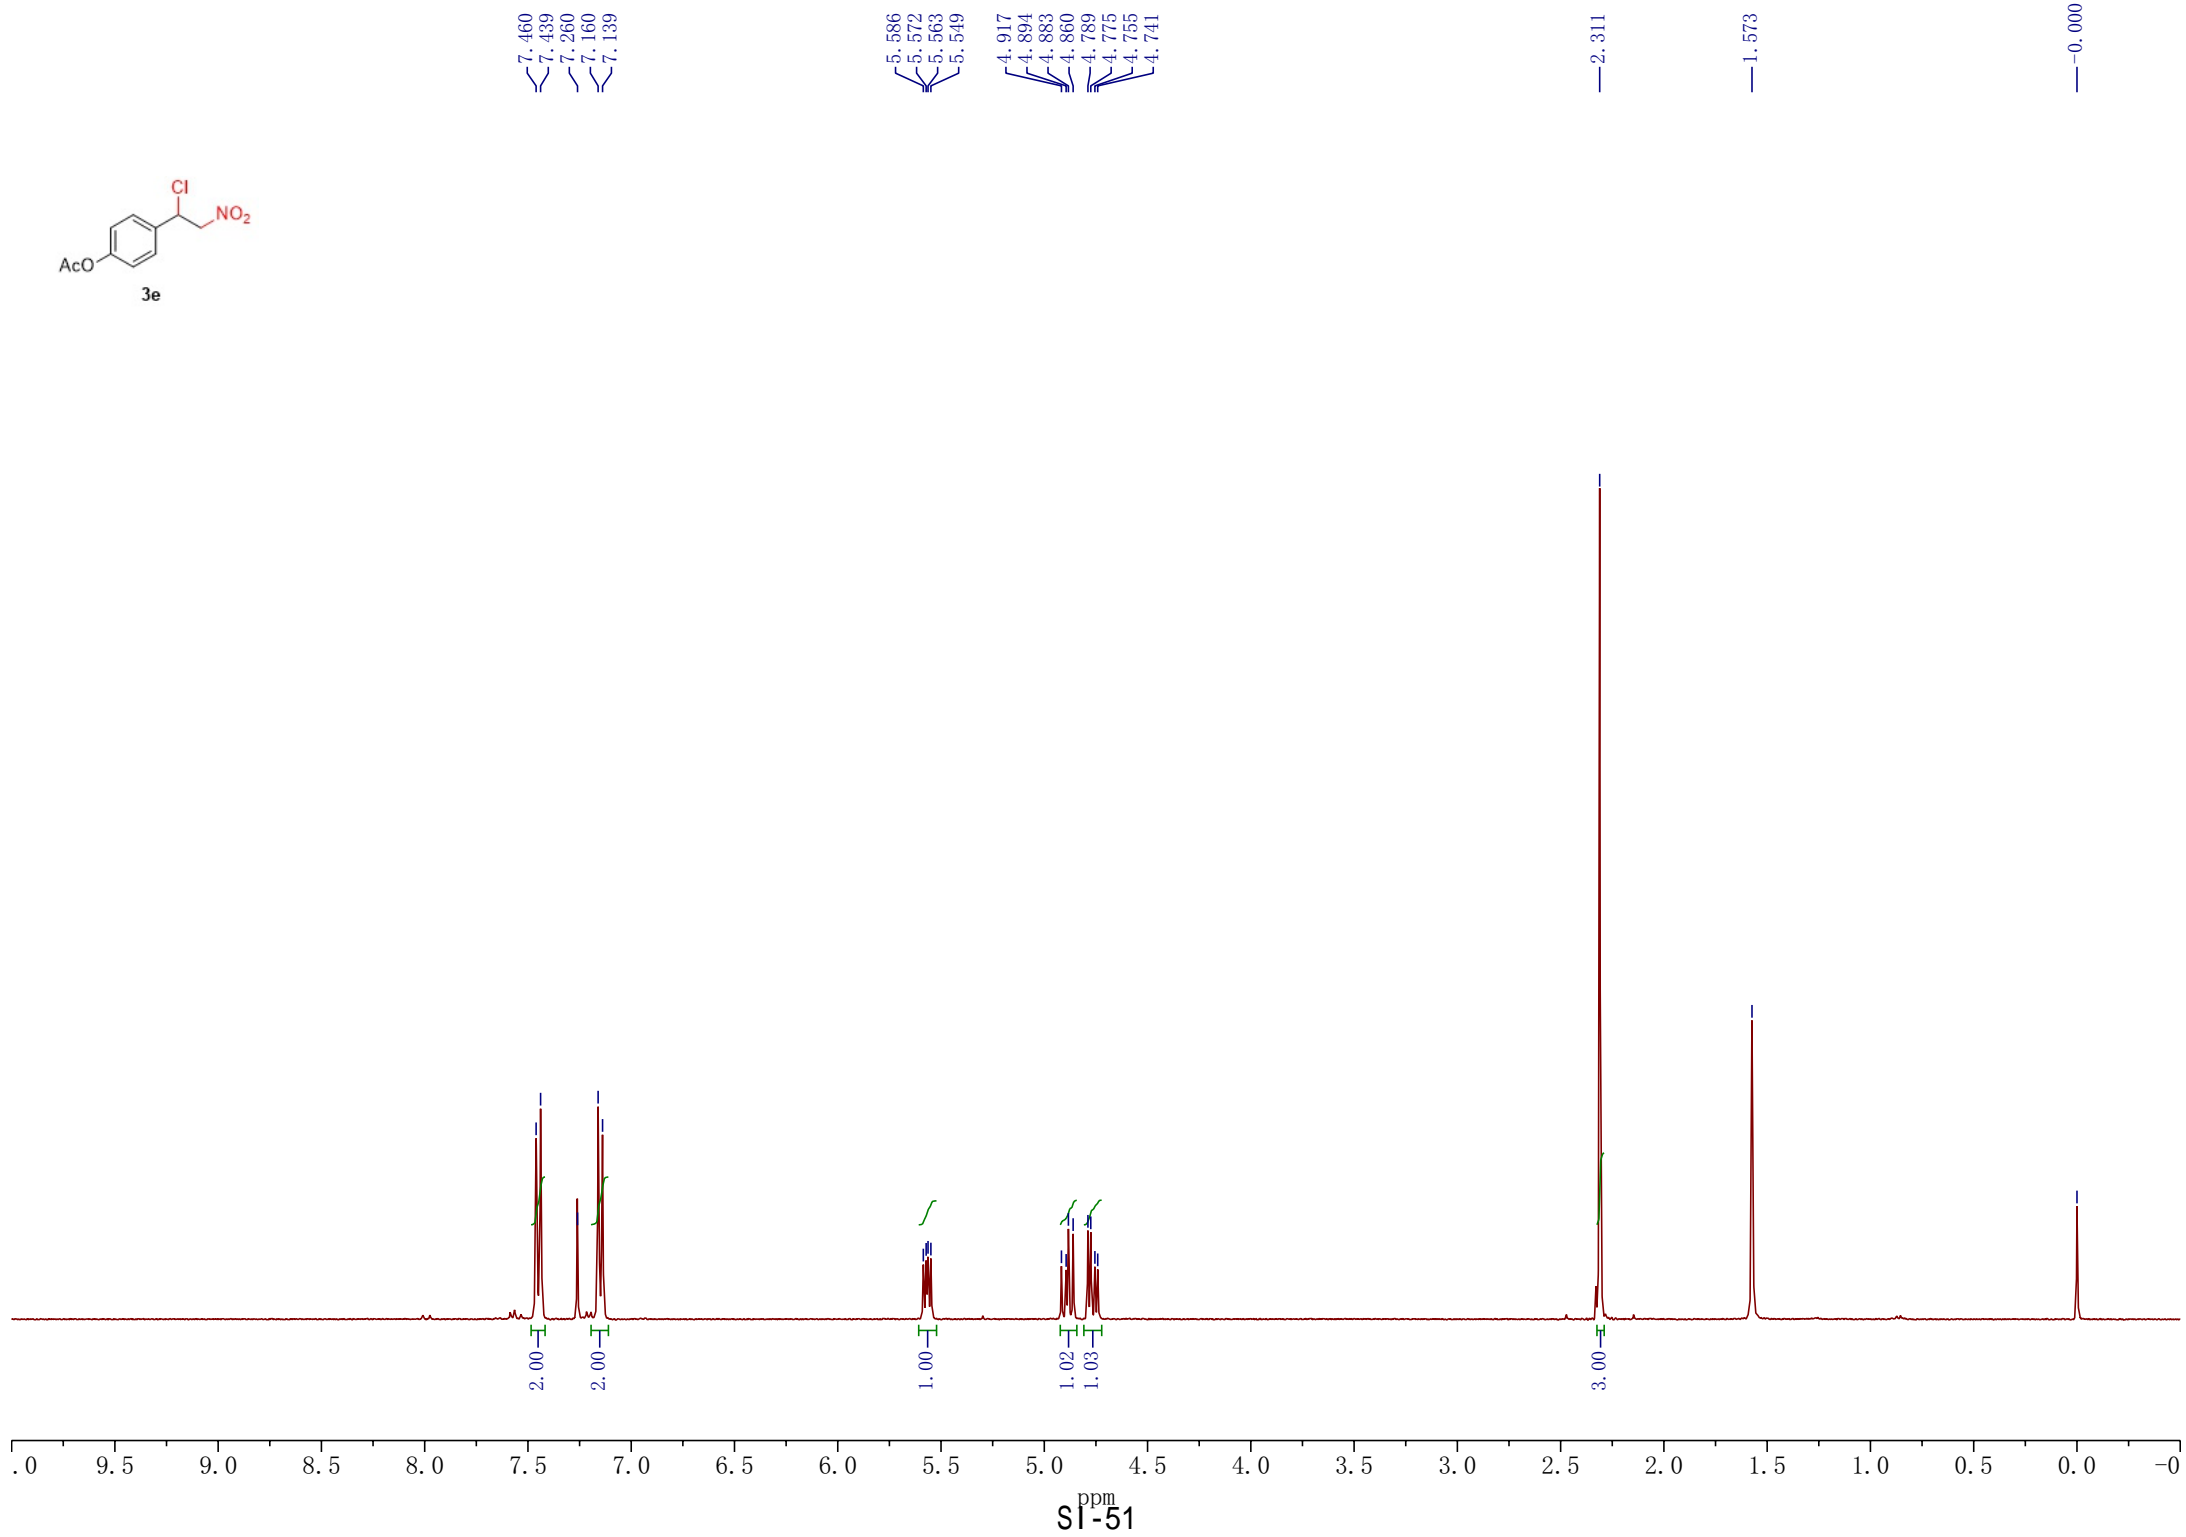

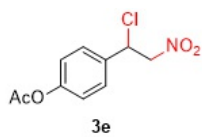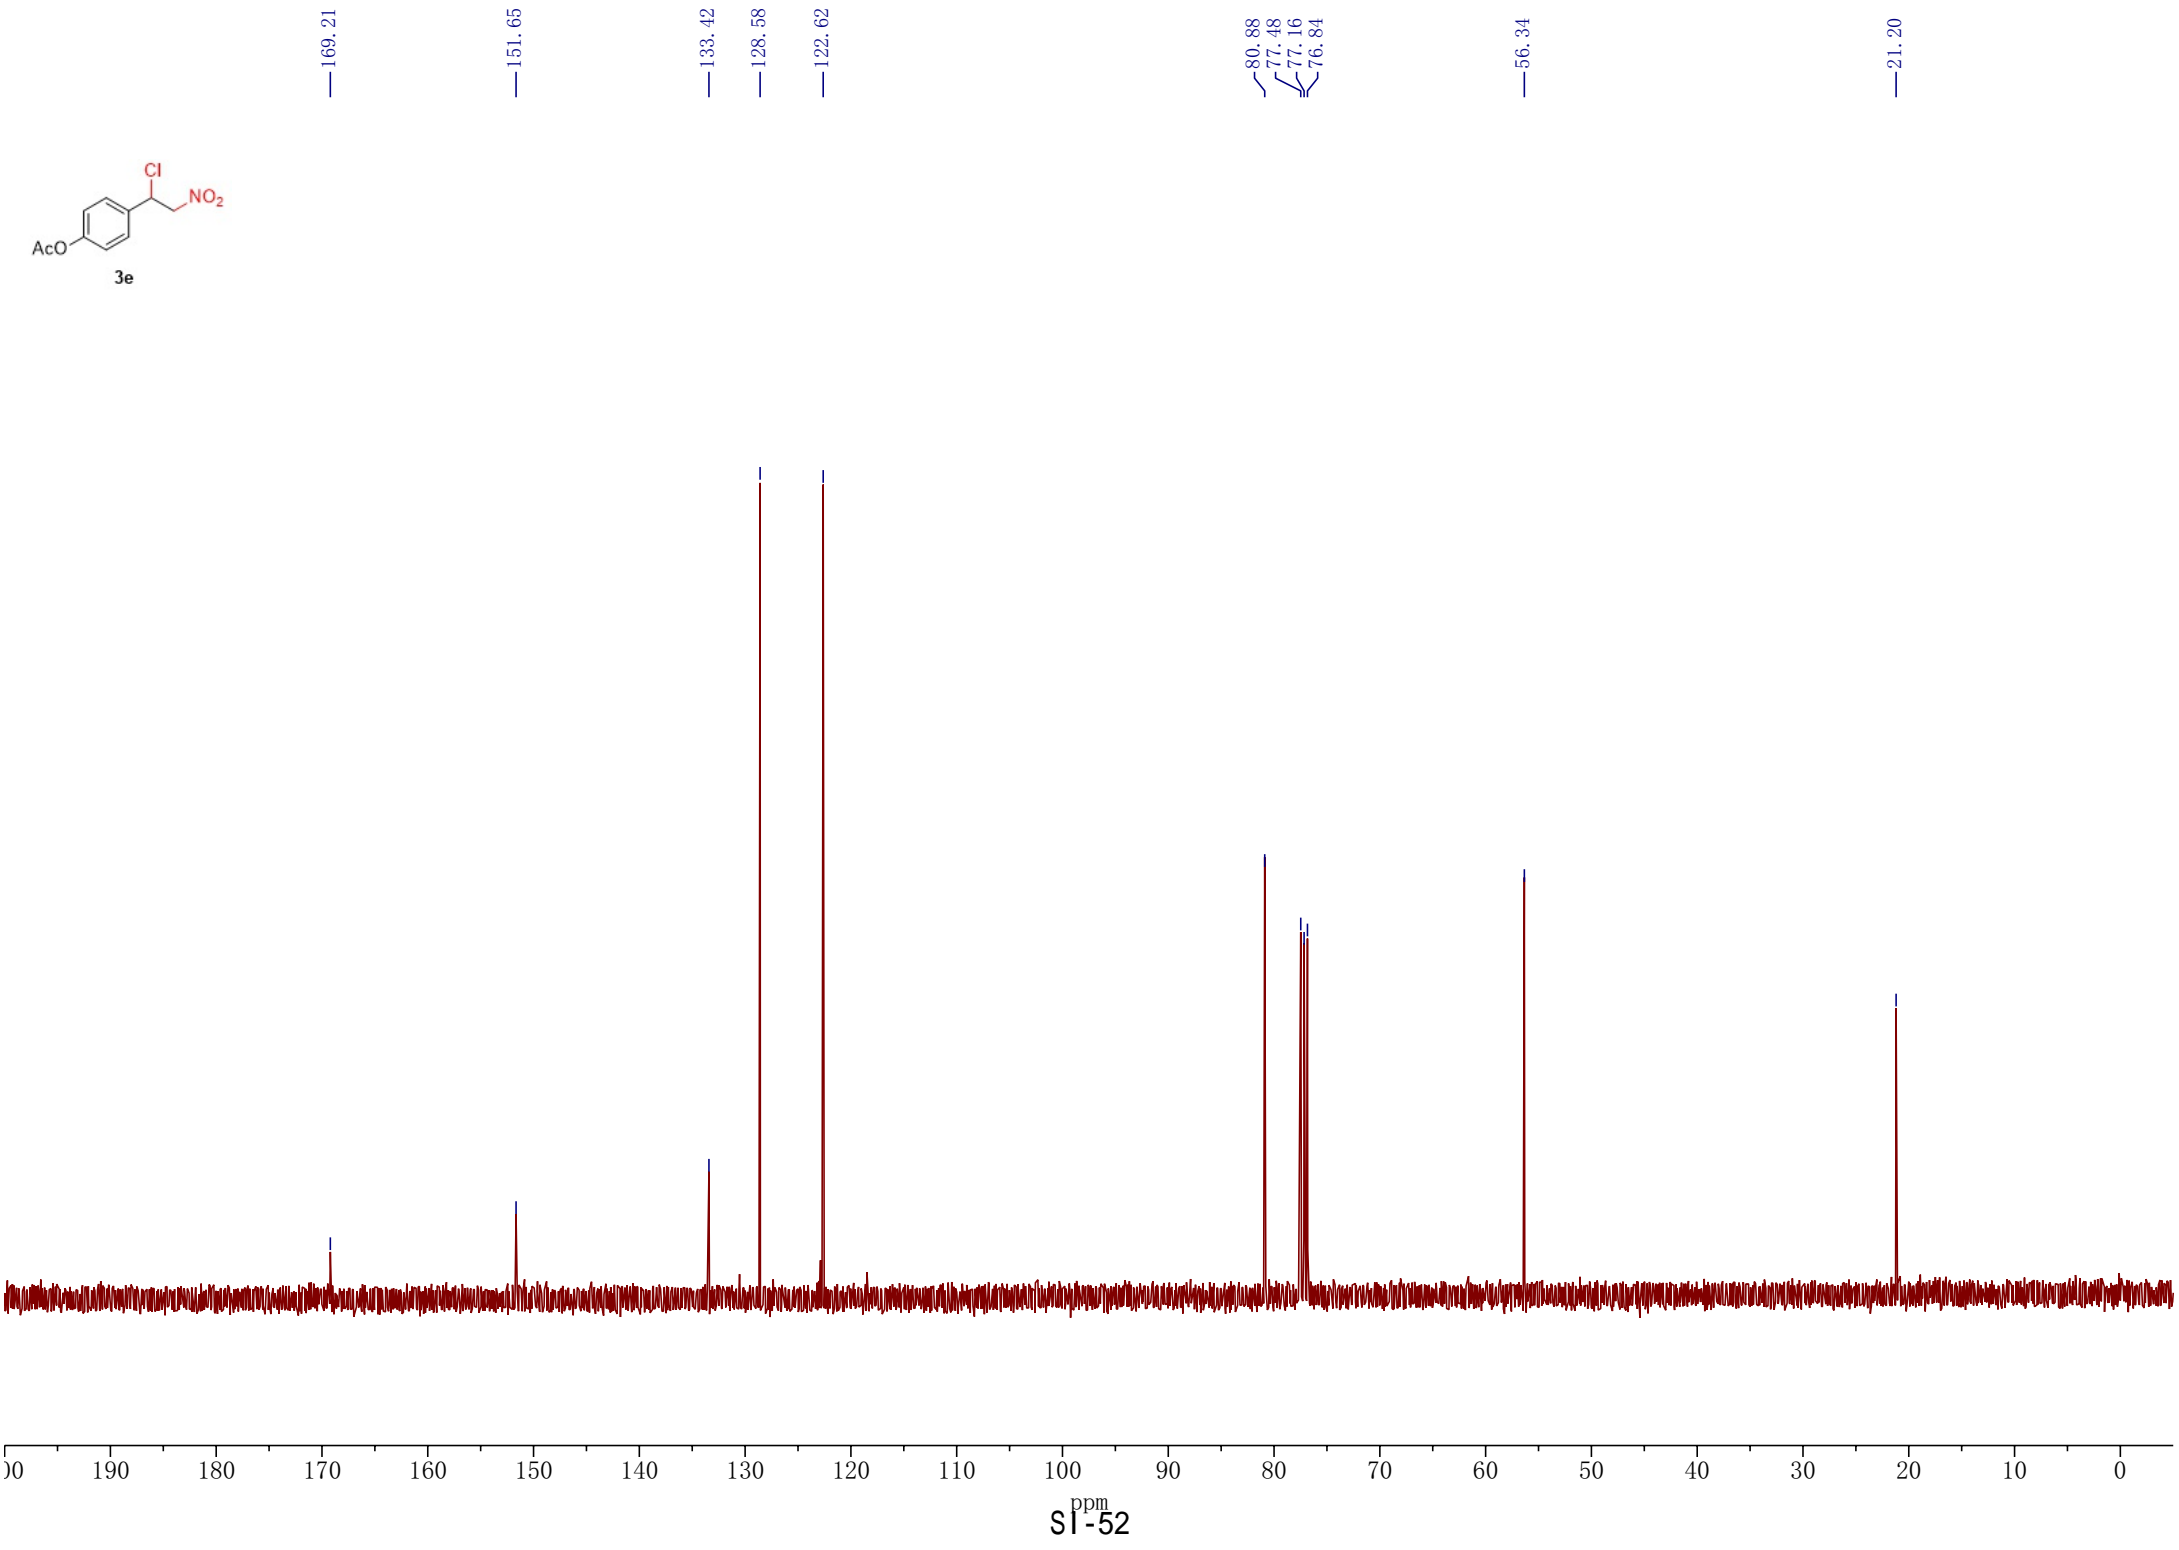

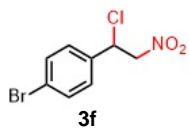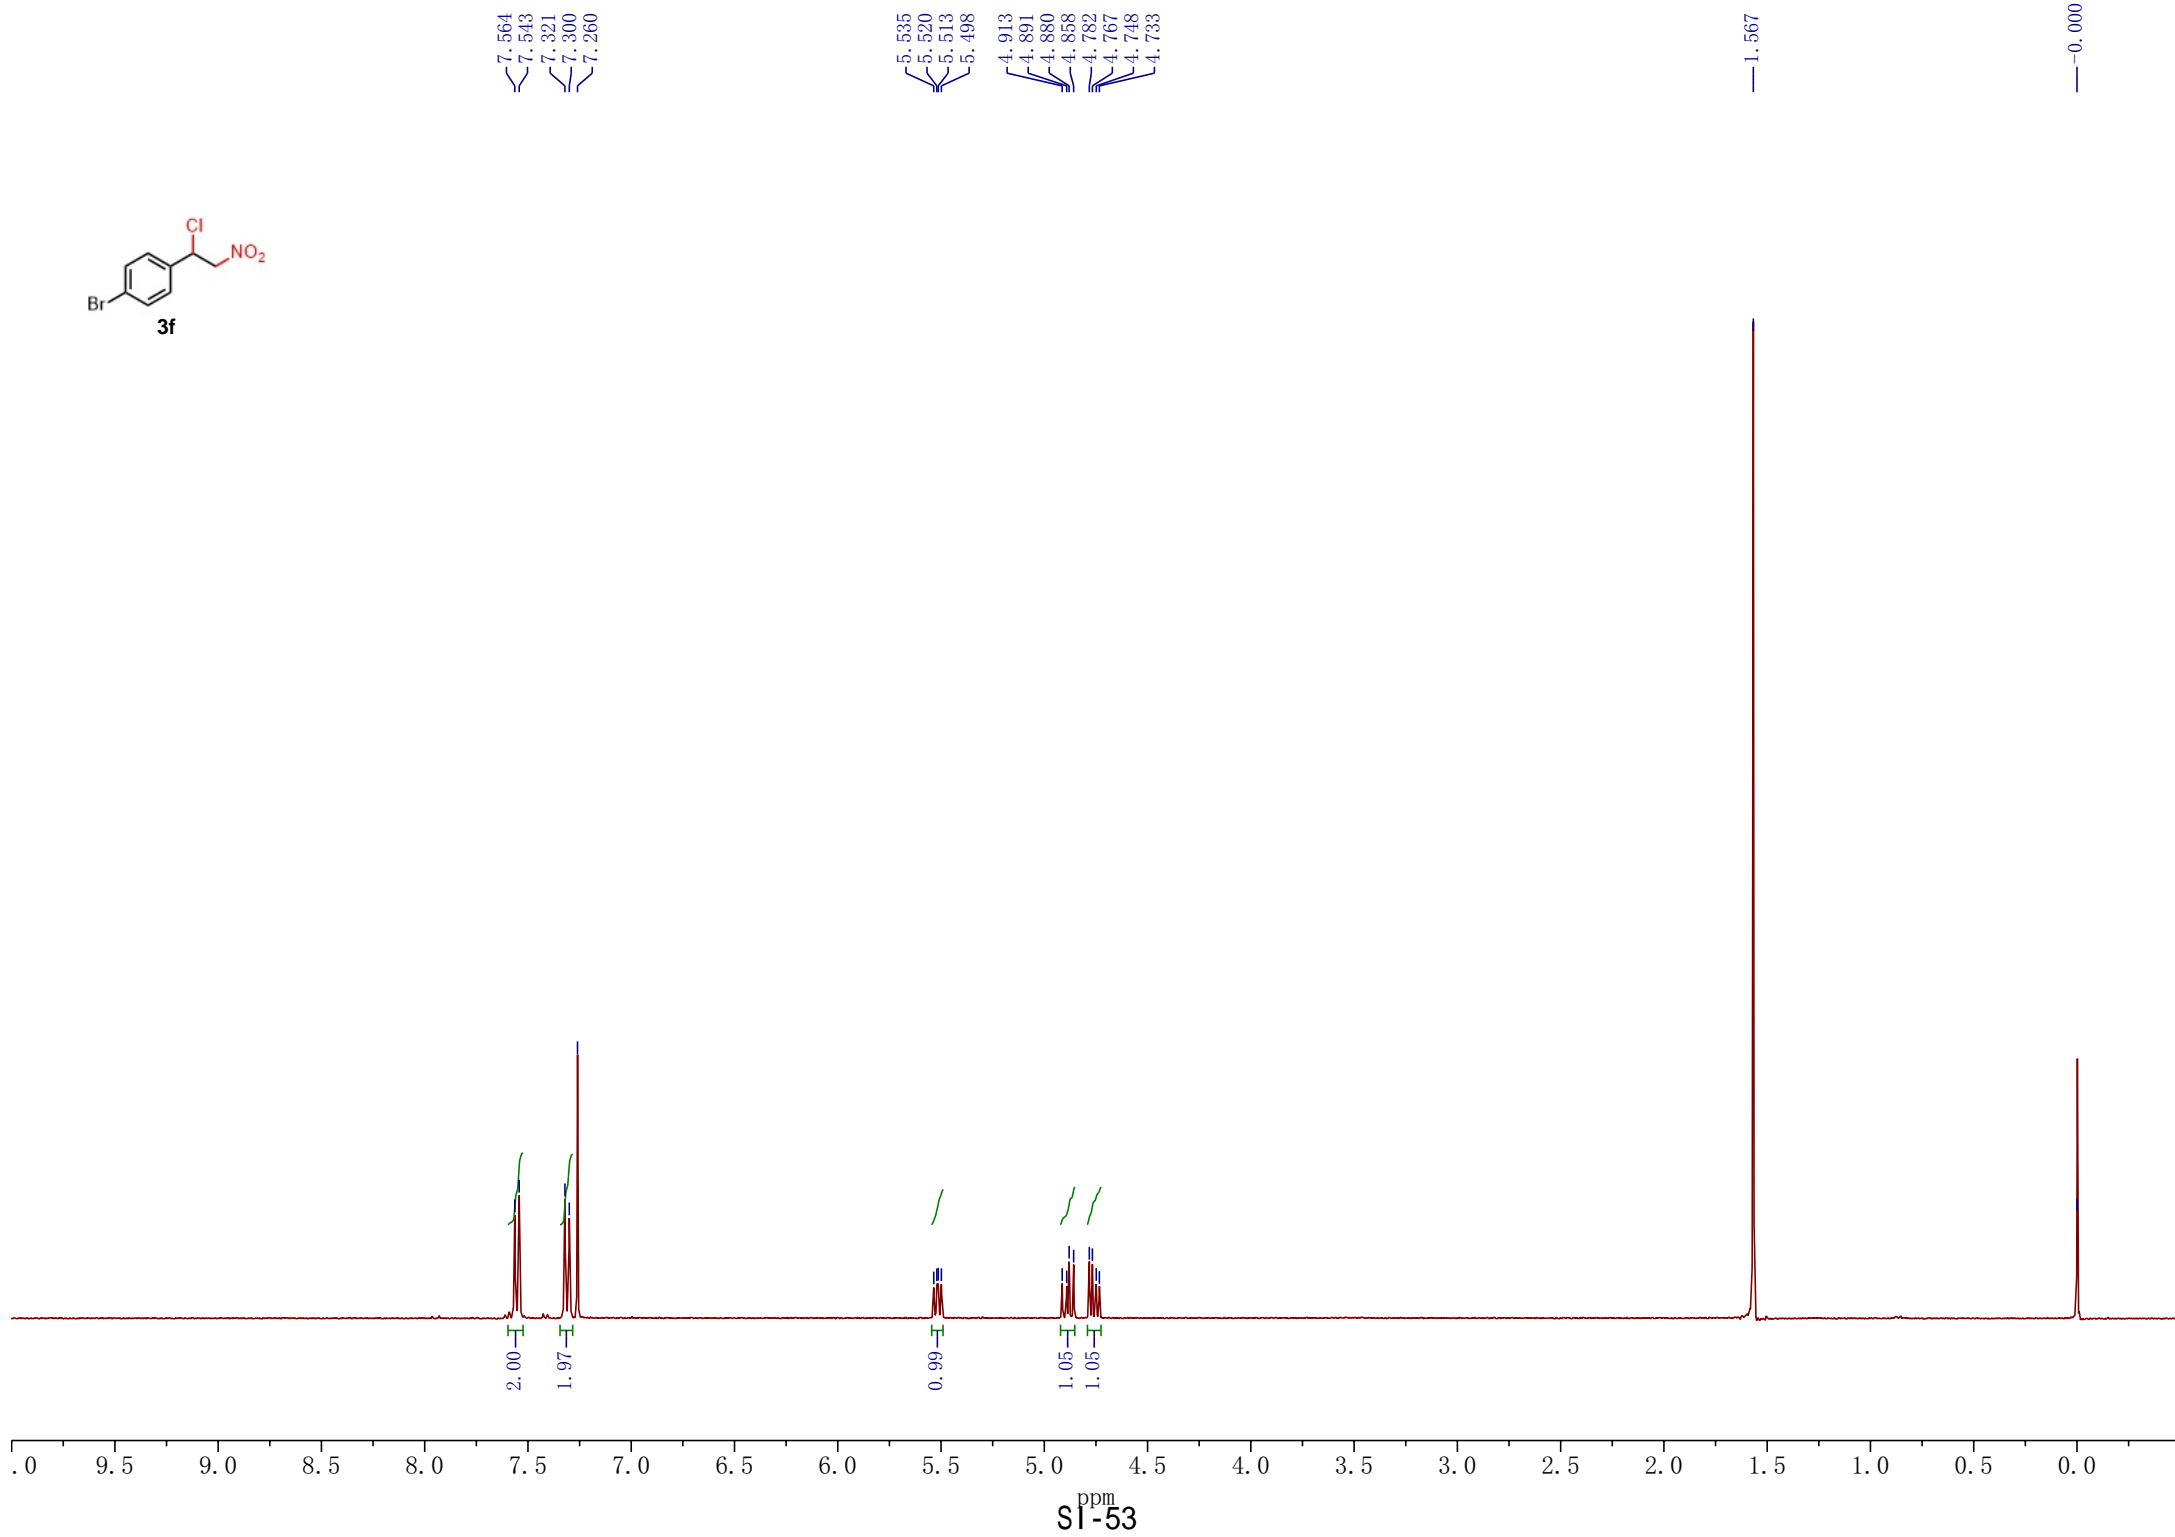

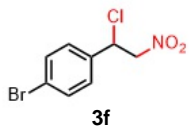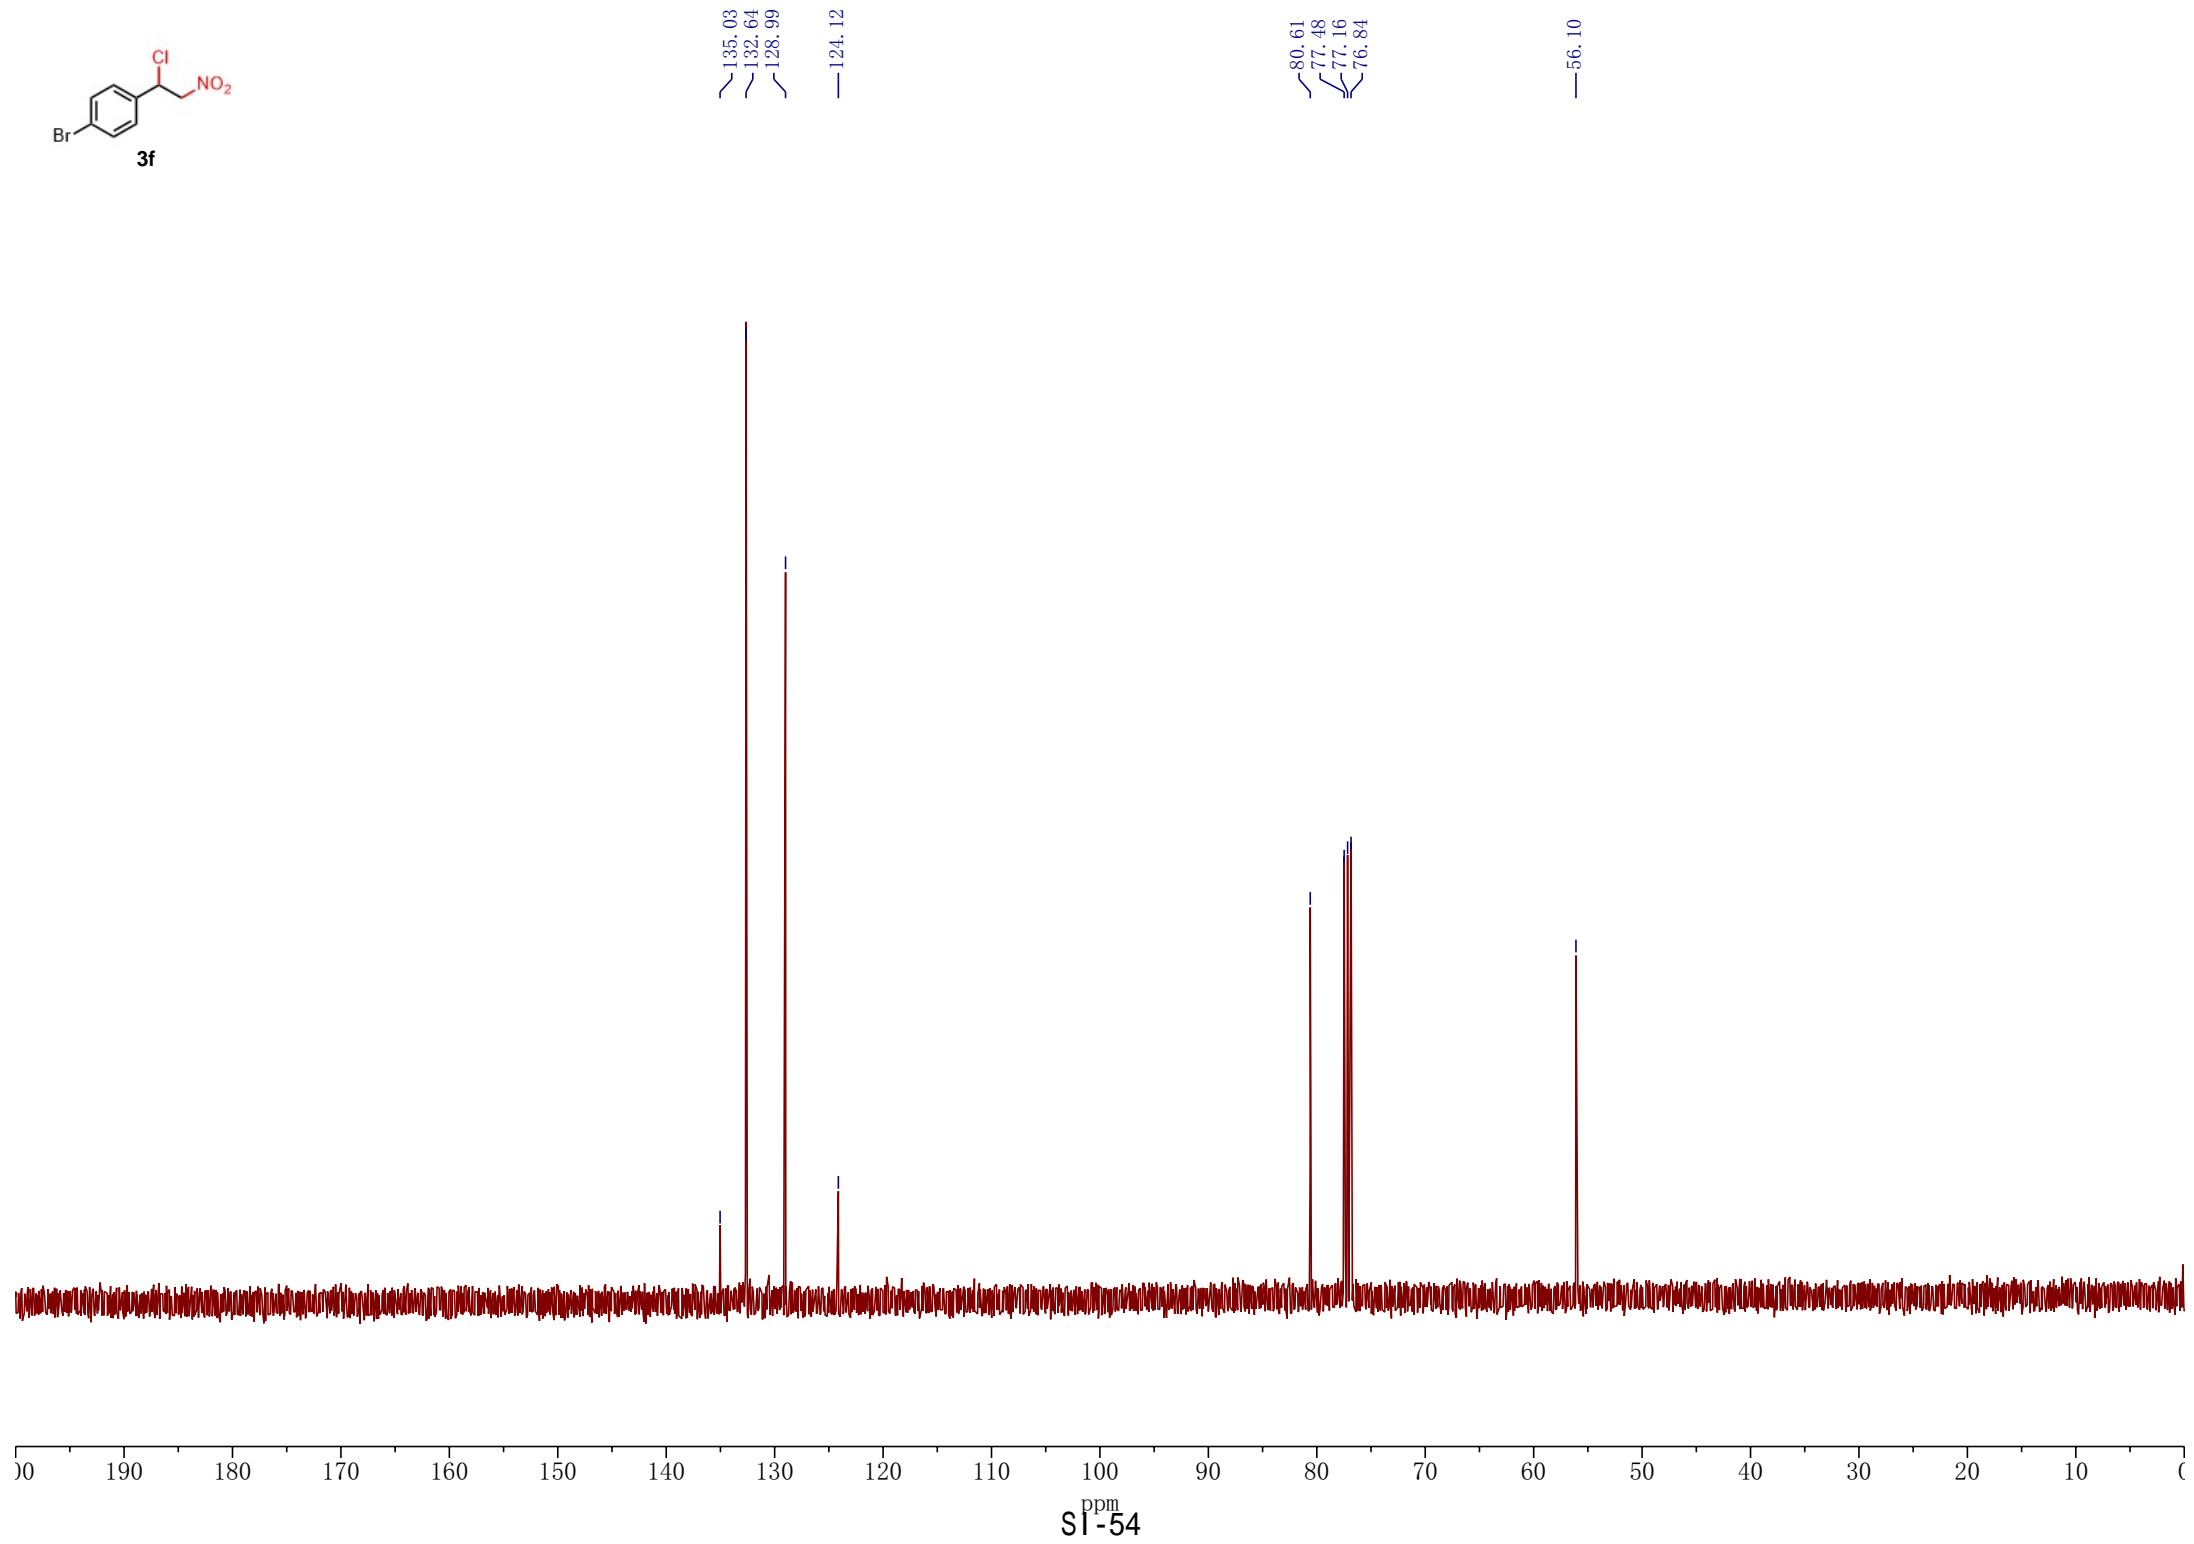

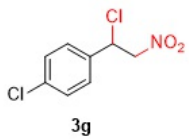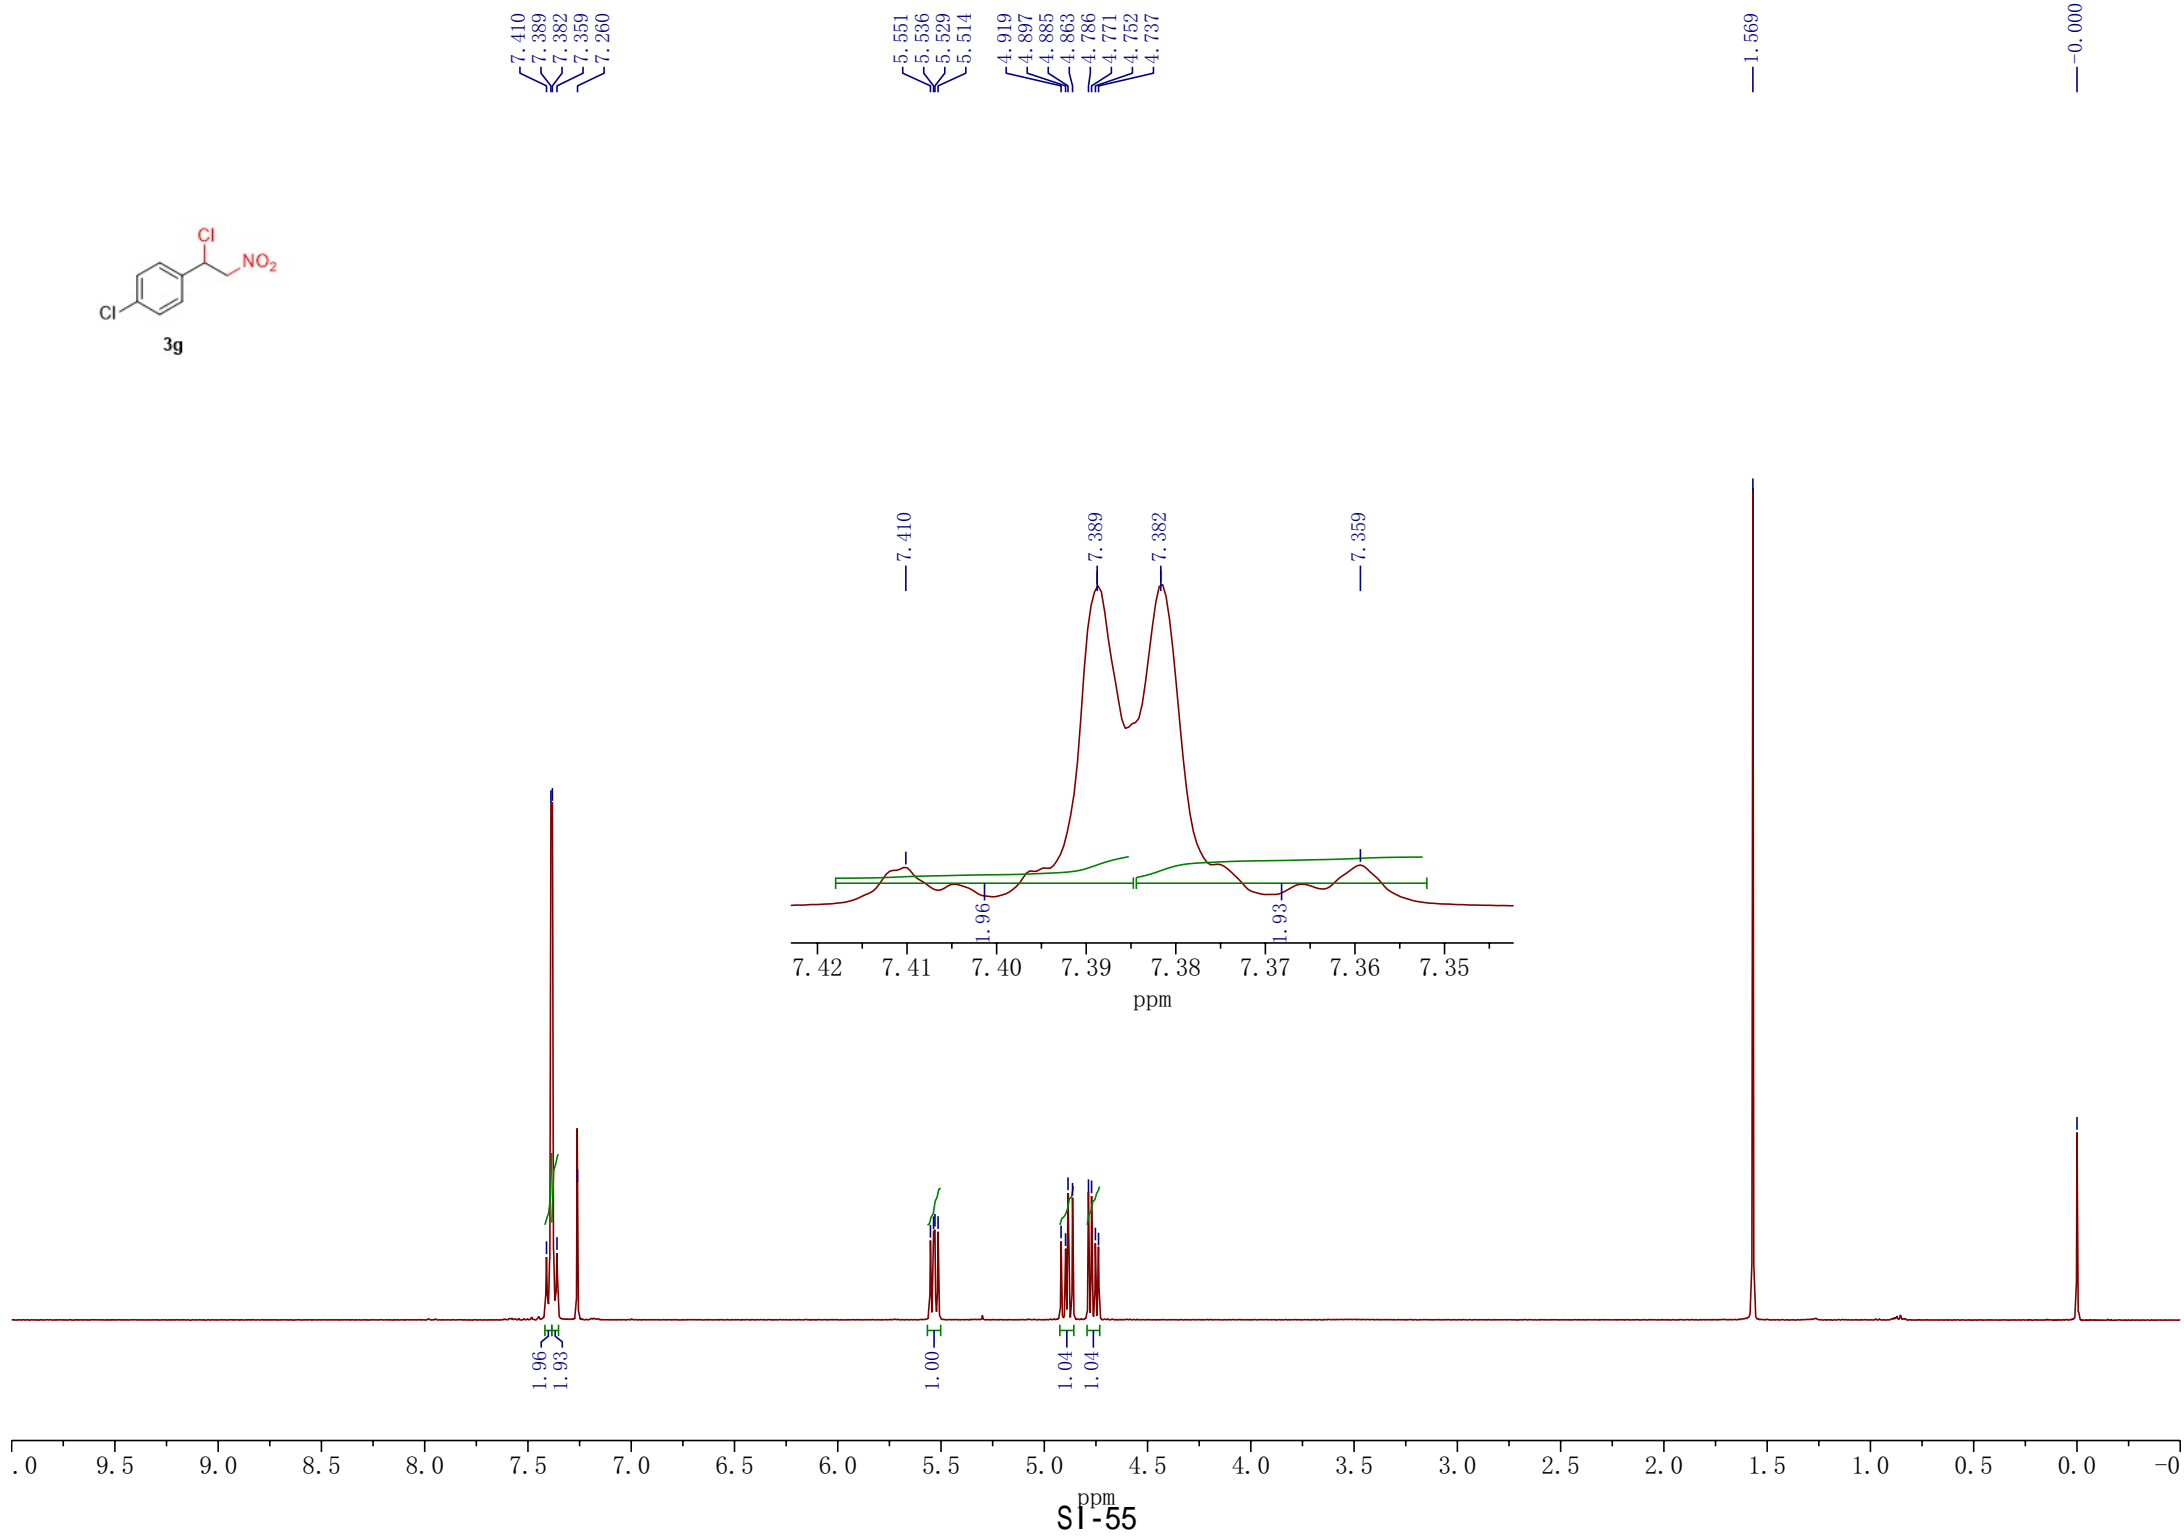

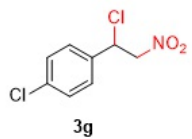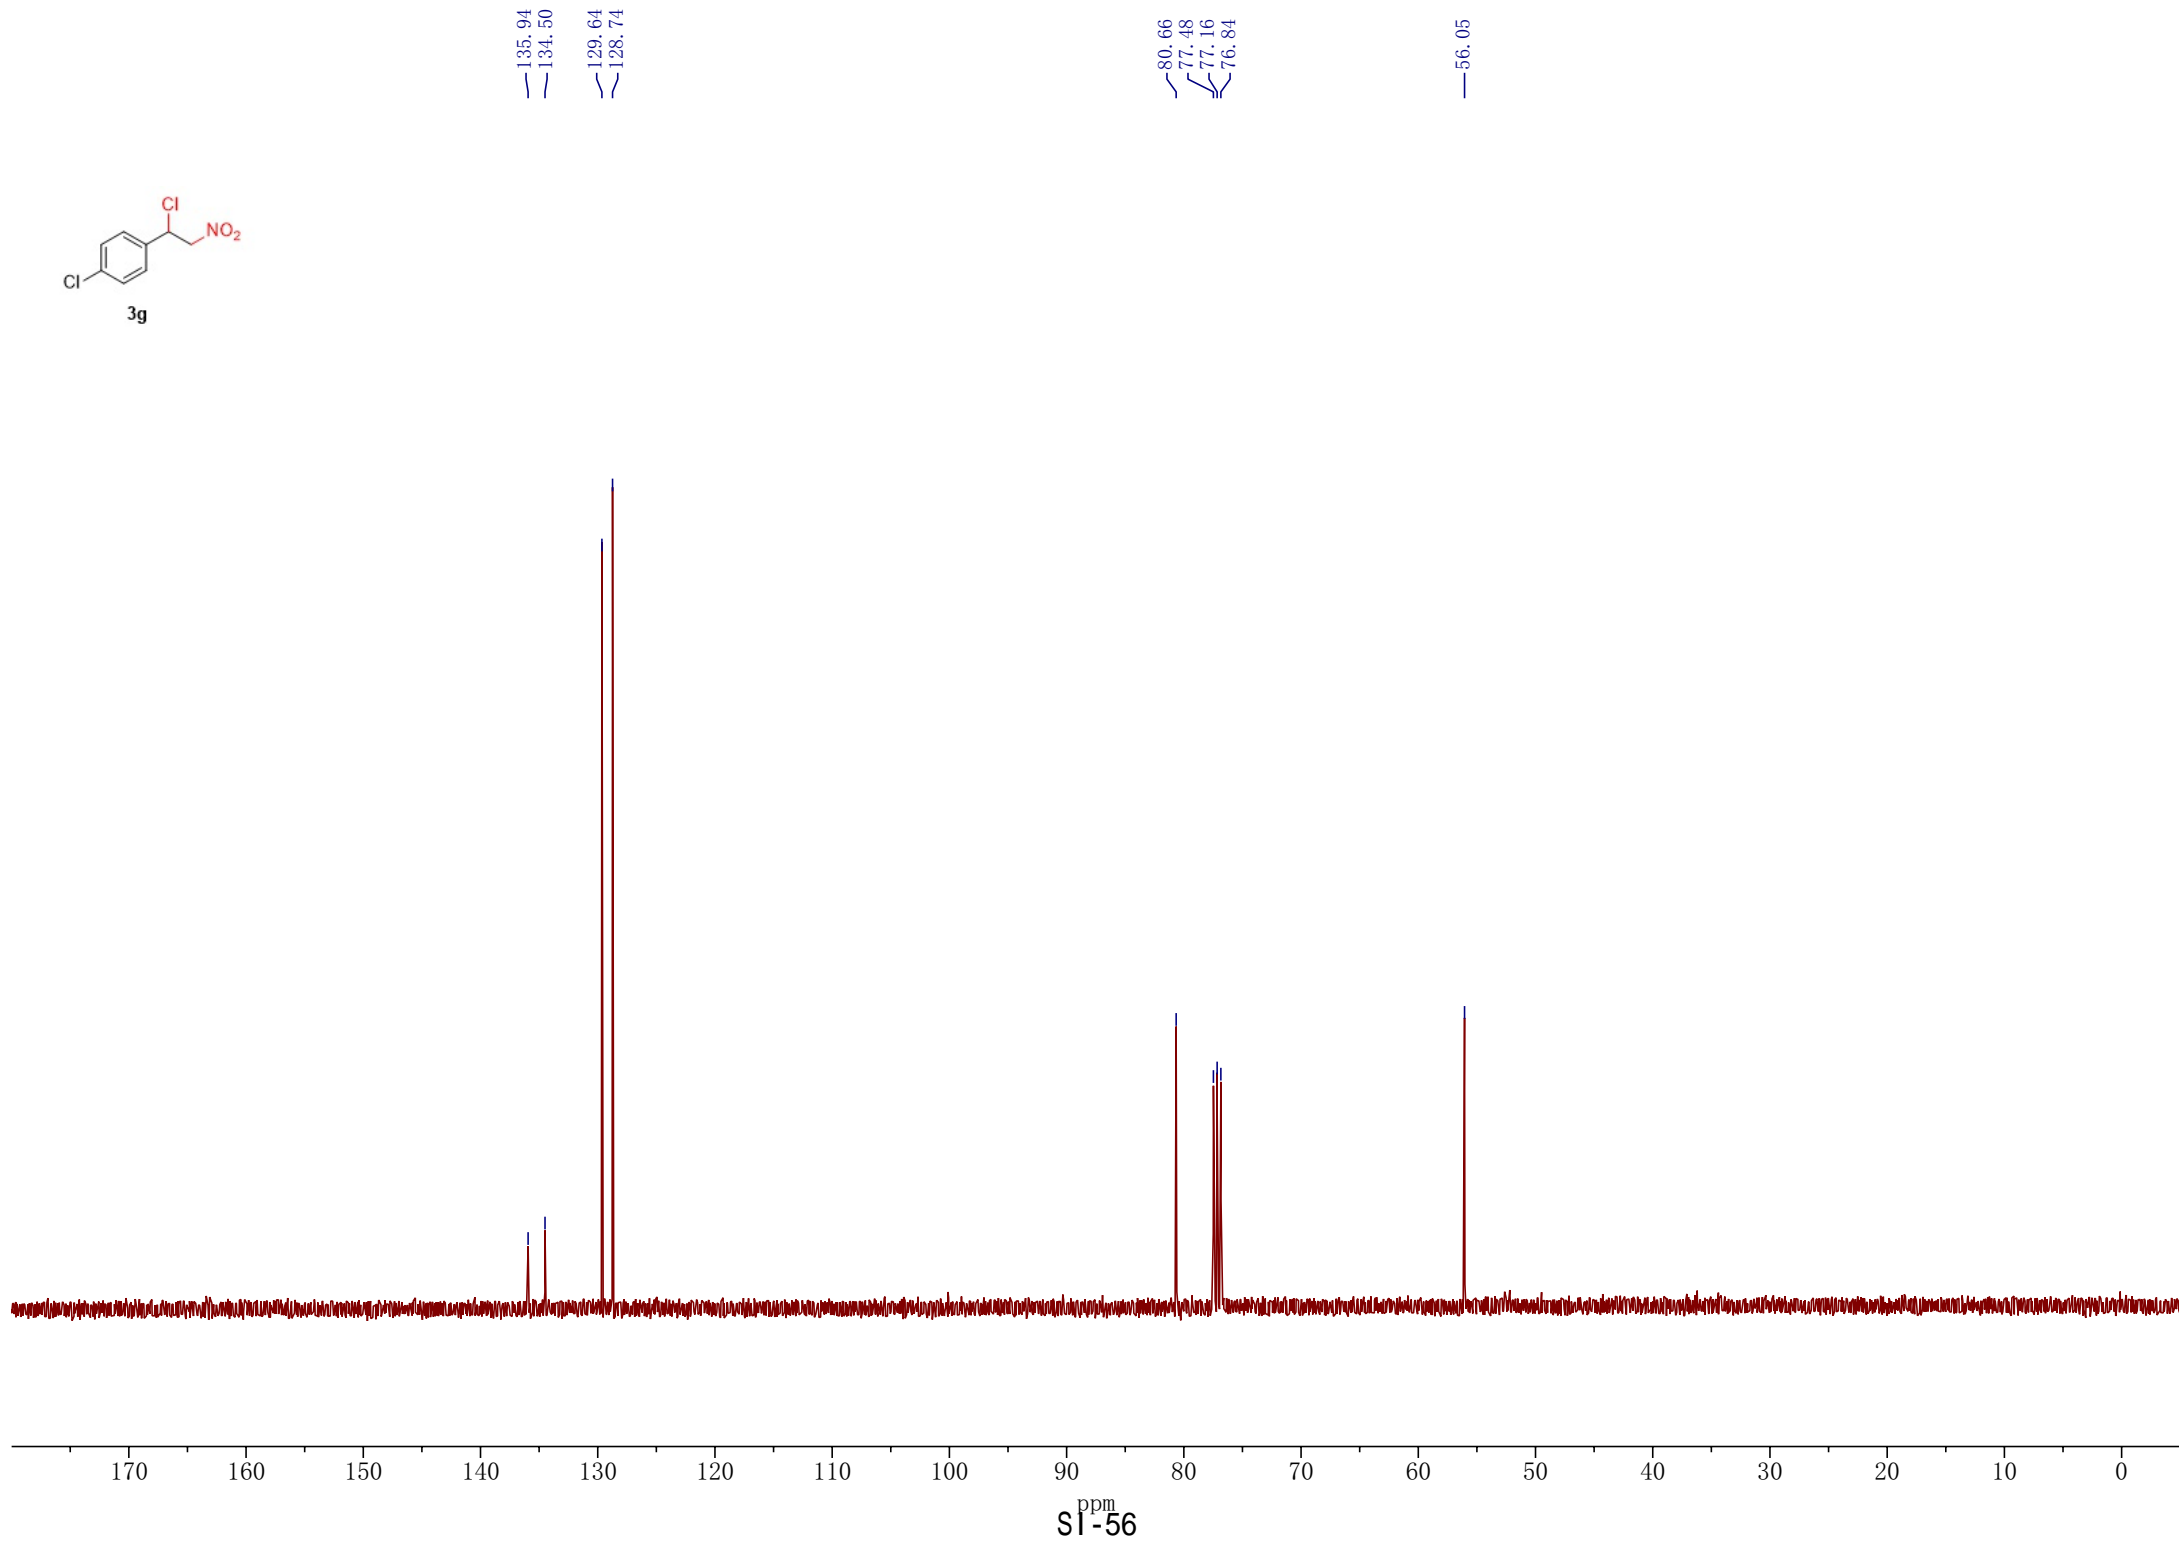



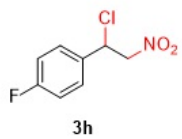

7.440  
7.435  
7.427  
7.423  
7.418  
7.410  
7.405  
7.260  
7.135  
7.128  
7.122  
7.111  
7.106  
7.101  
7.090  
7.085  
7.077

5.568  
5.553  
5.546  
5.531  
4.926  
4.904  
4.892  
4.871  
4.789  
4.774  
4.756  
4.741

1.548

-0.000

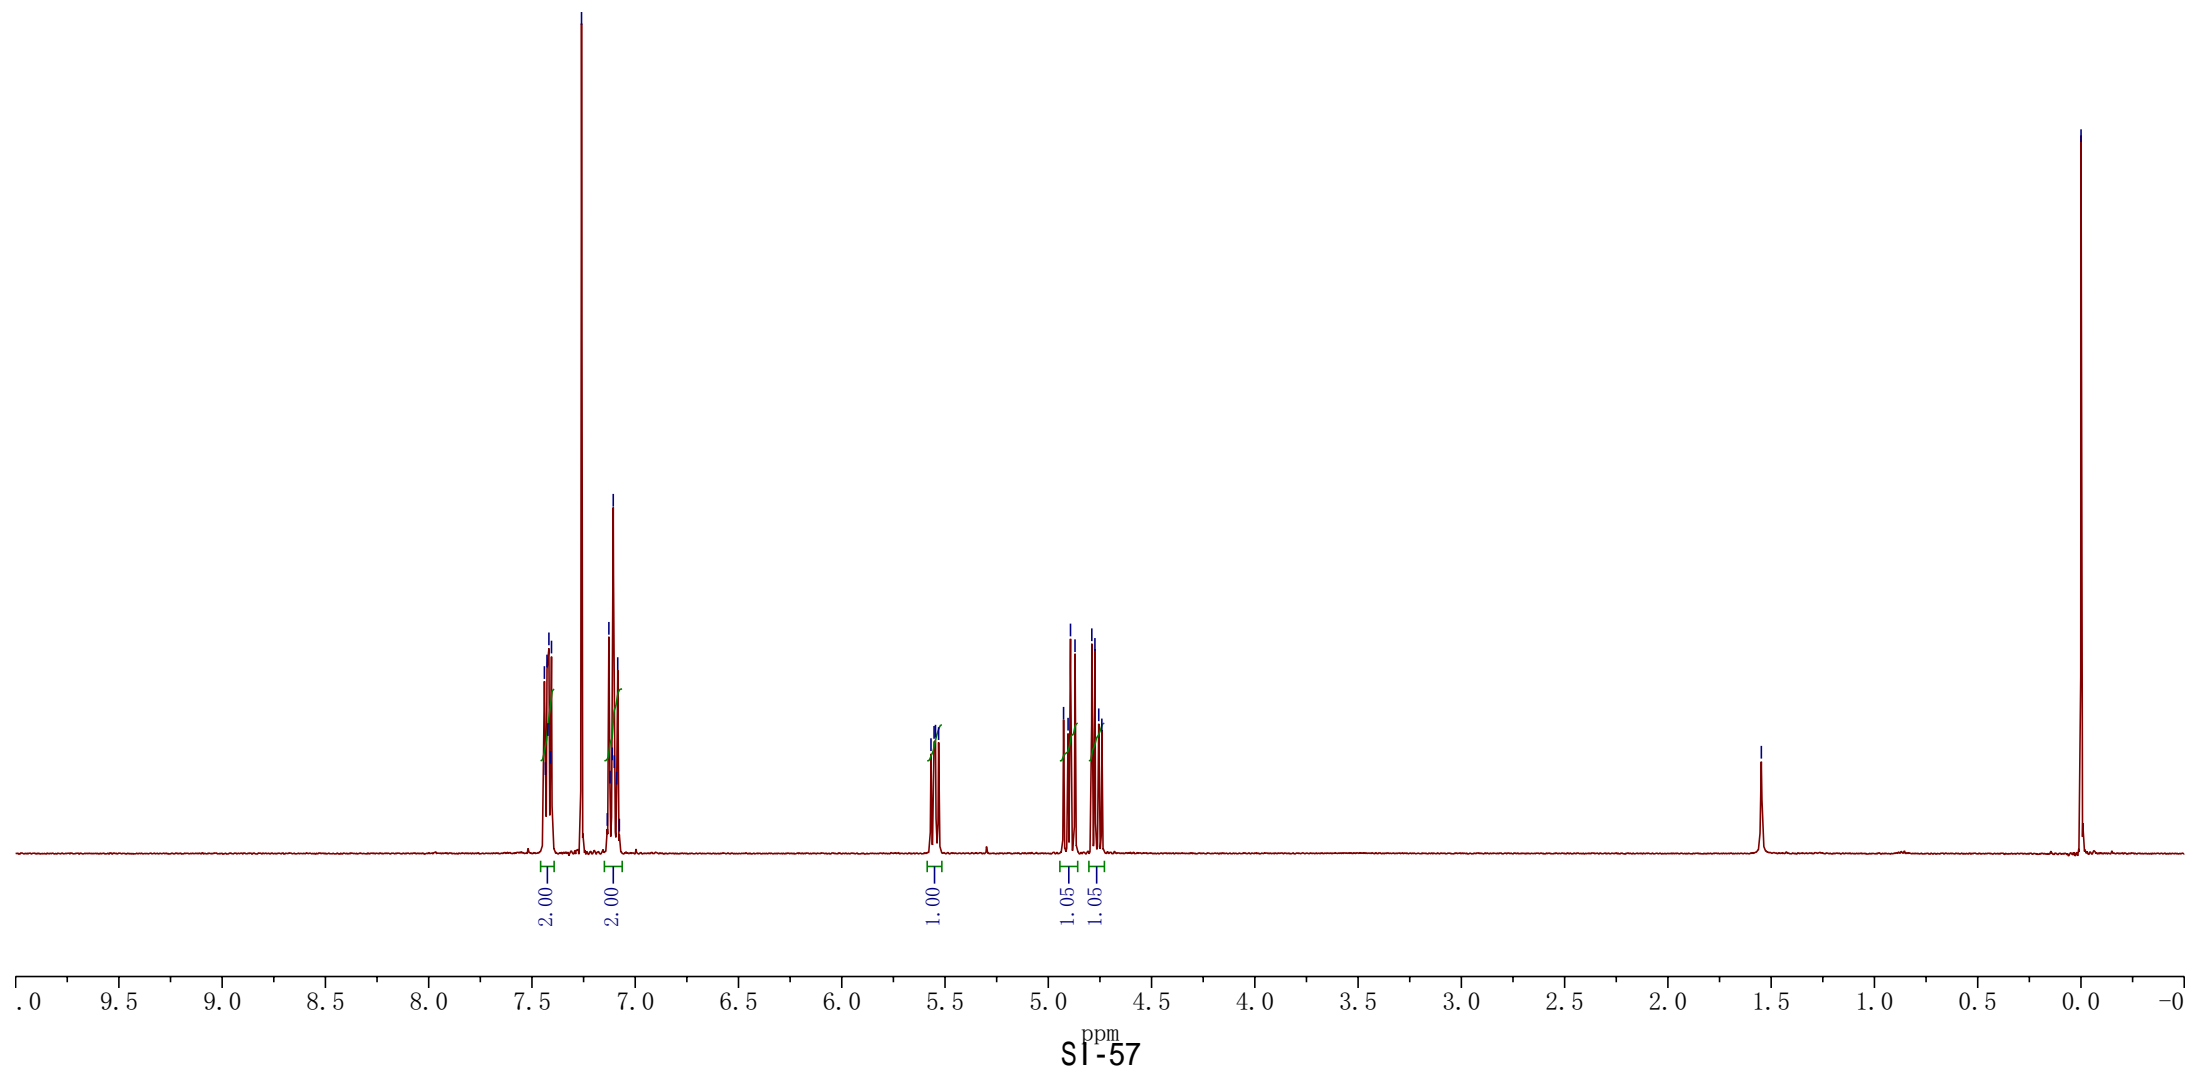



— 164.66  
— 162.17

∩ 131.97  
∩ 131.94  
∩ 129.37  
∩ 129.29

∩ 116.63  
∩ 116.41

∩ 80.87  
∩ 77.48  
∩ 77.16  
∩ 76.84

— 56.12

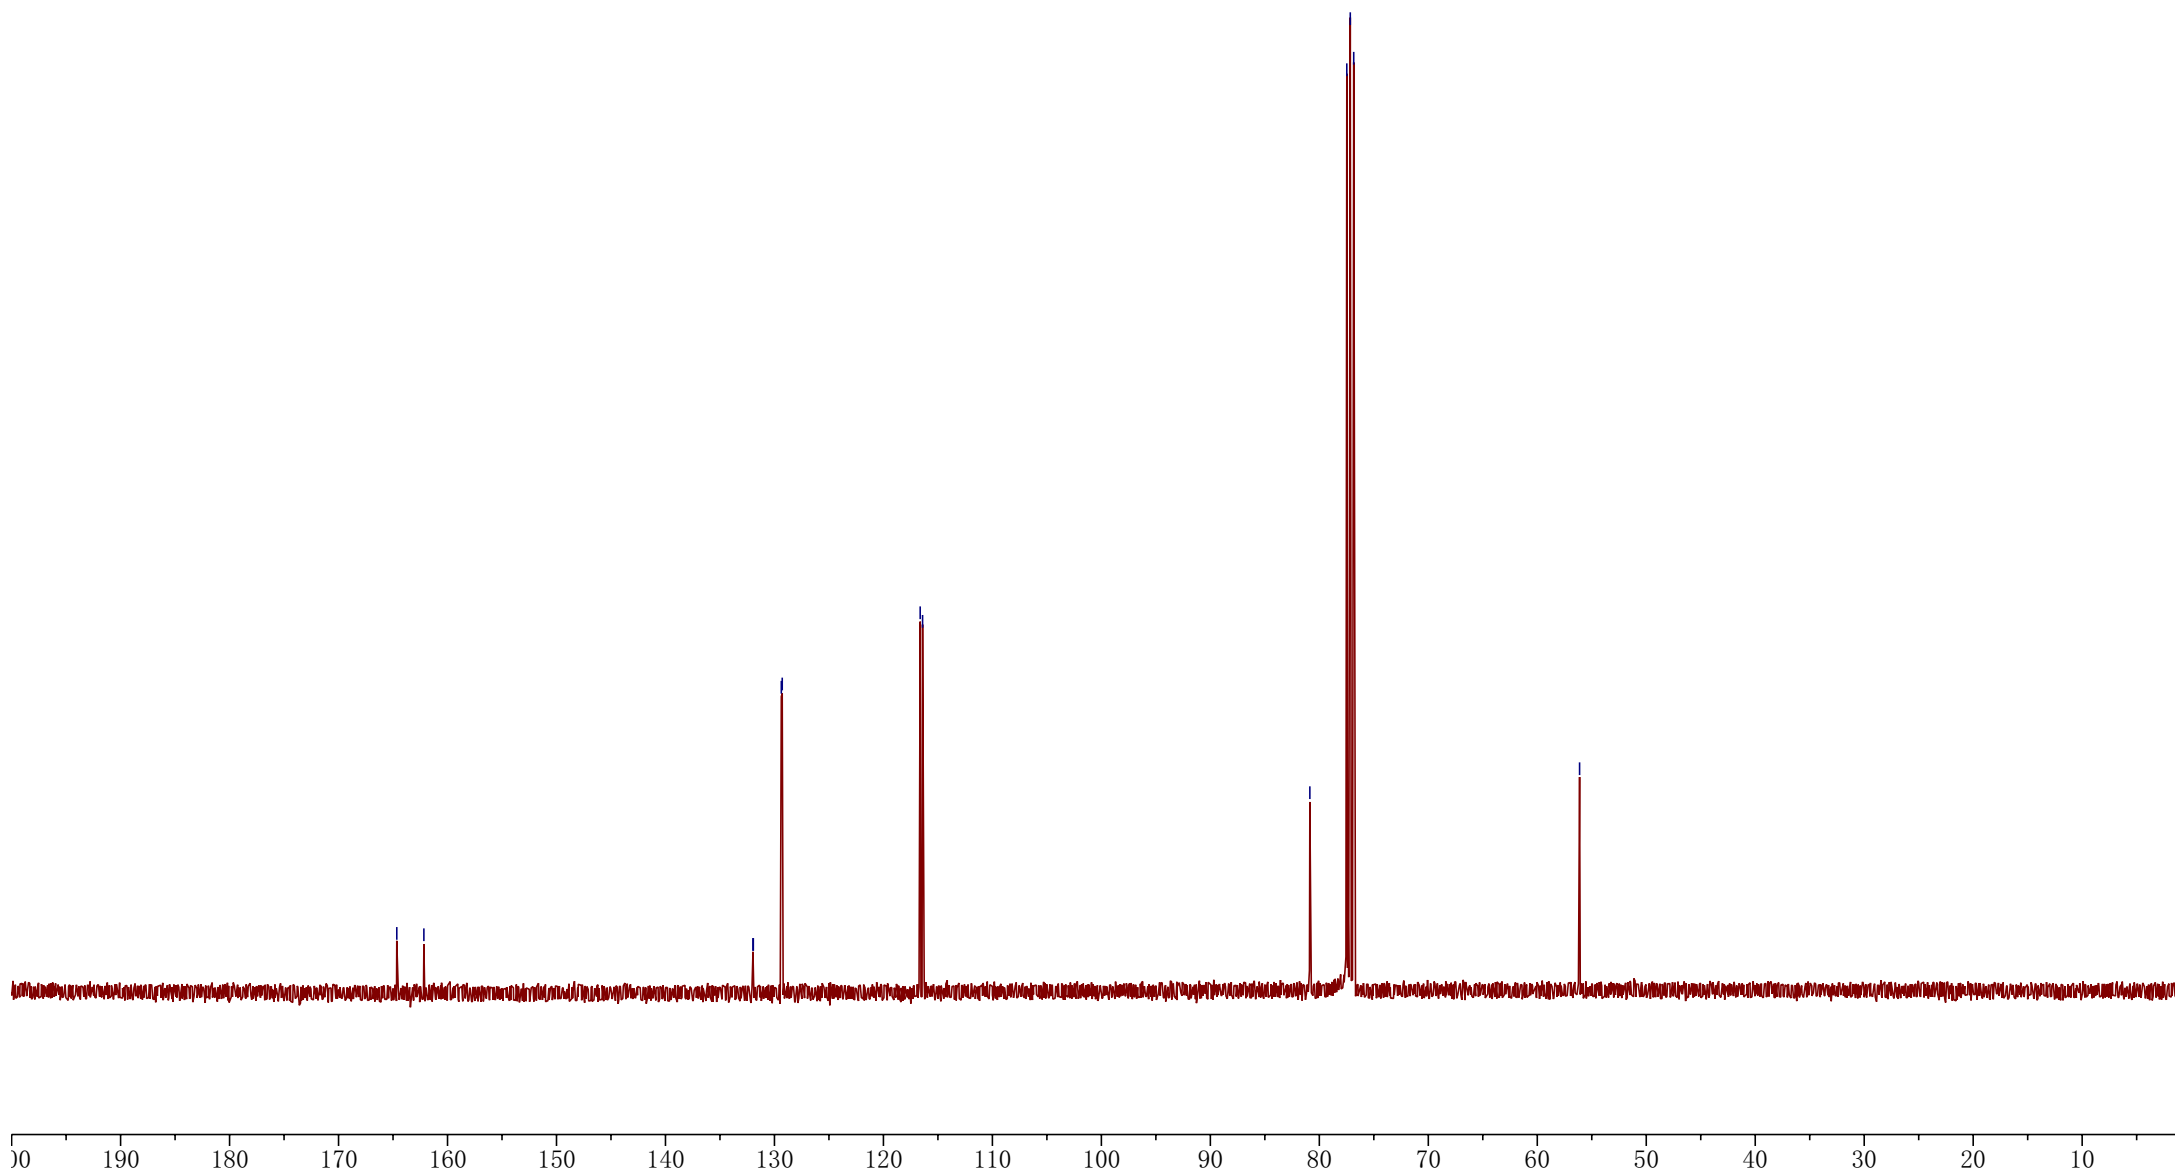

SI-58

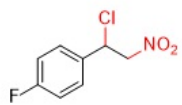

3h

— 96.379

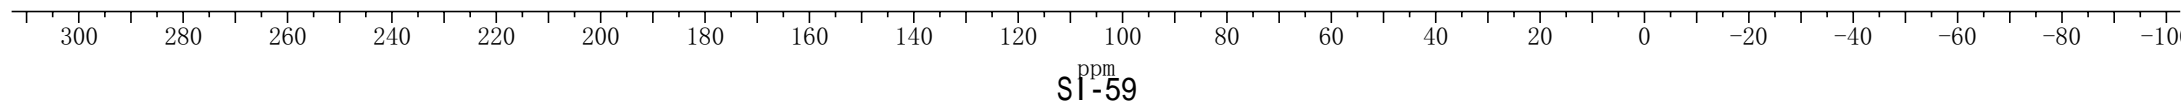

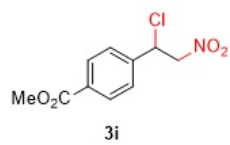

8.098  
8.077

7.530  
7.509

7.260

5.619  
5.604  
5.597  
5.582

4.947  
4.925  
4.913  
4.891

4.820  
4.806  
4.787  
4.772

3.937

1.552

0.000

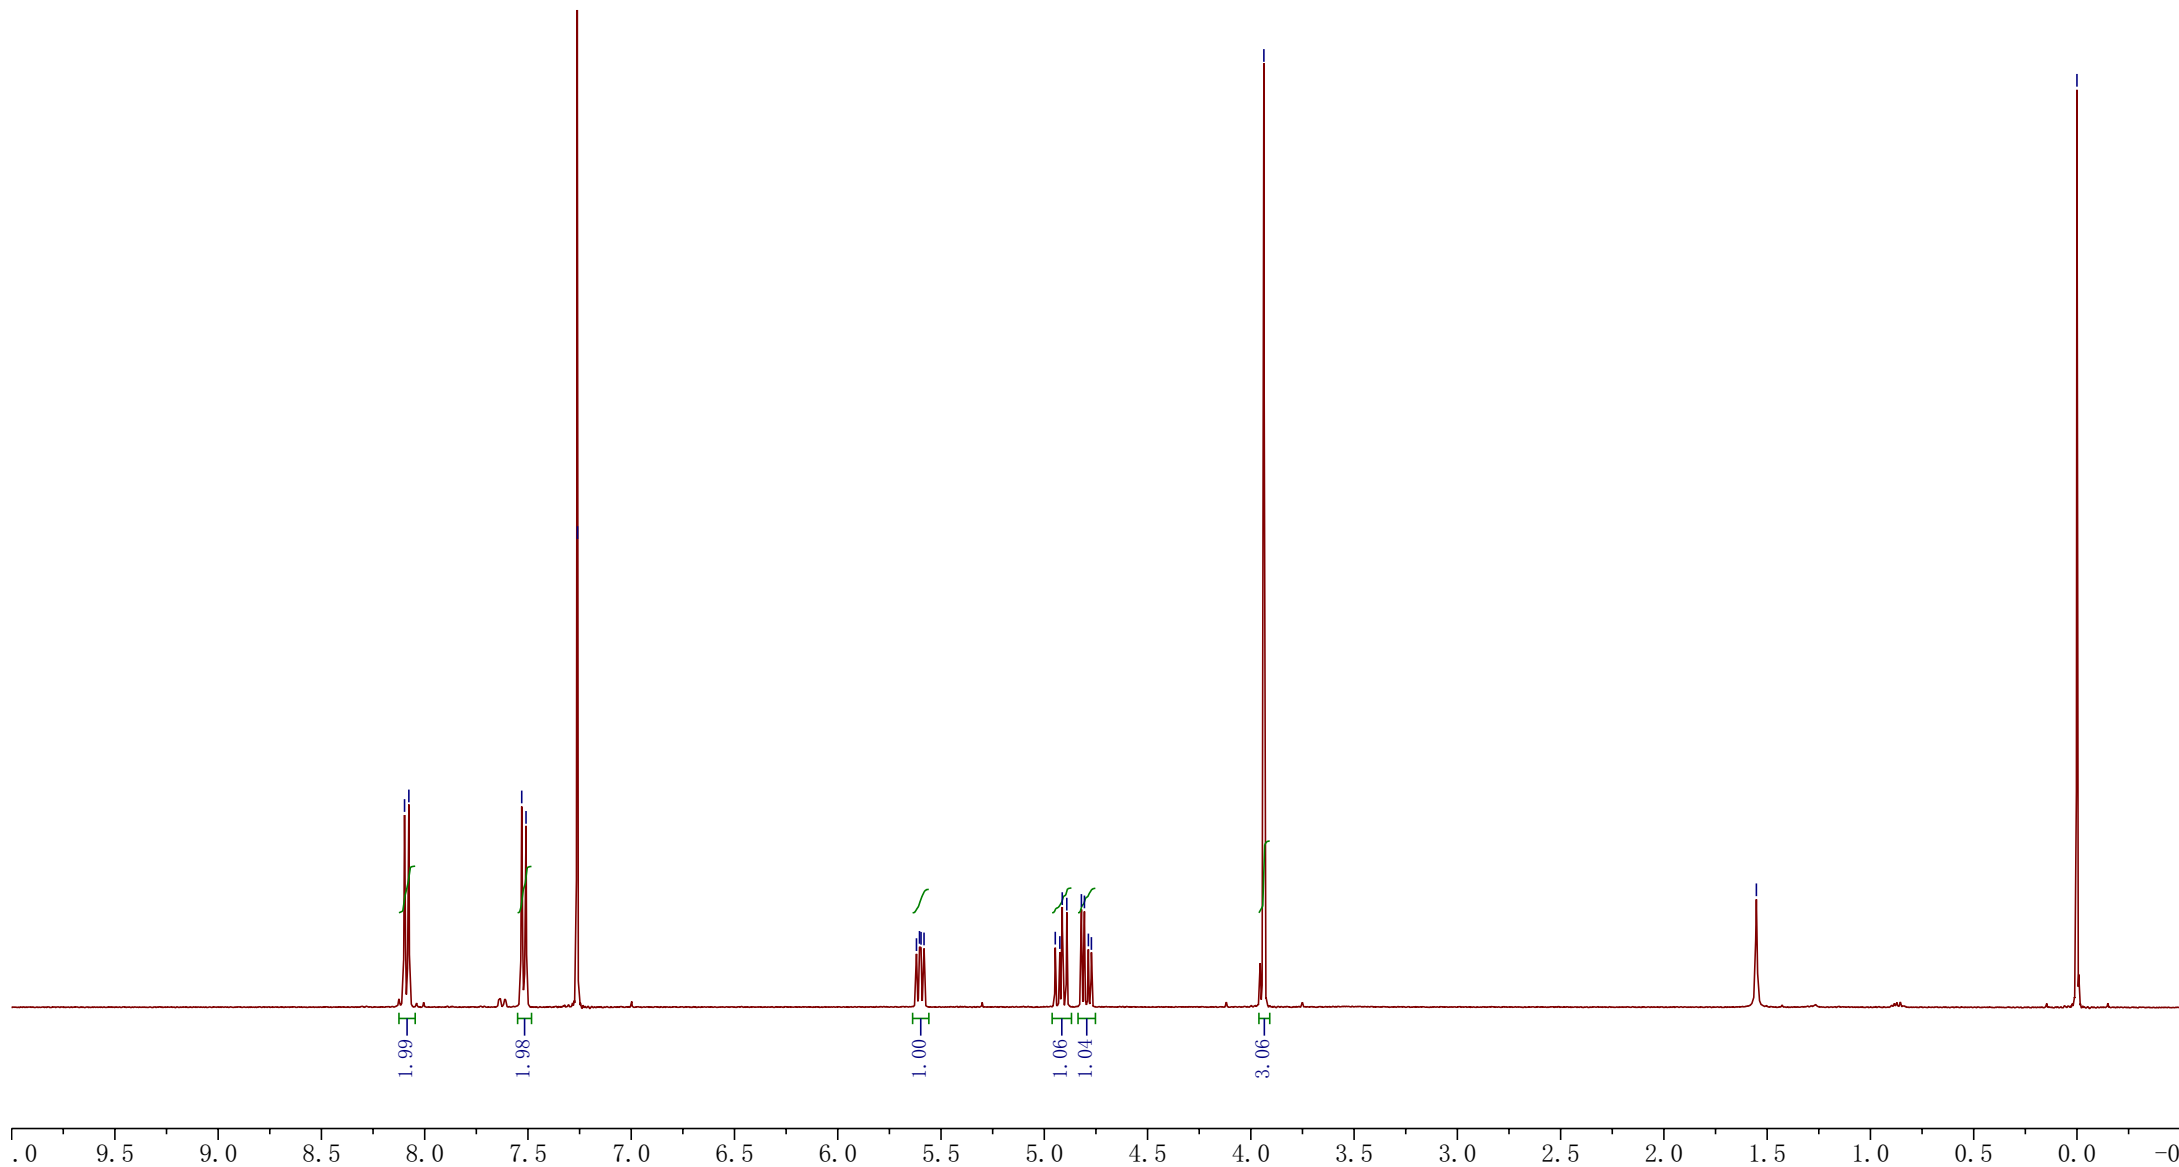

SI-60

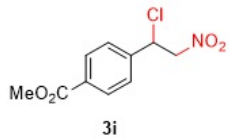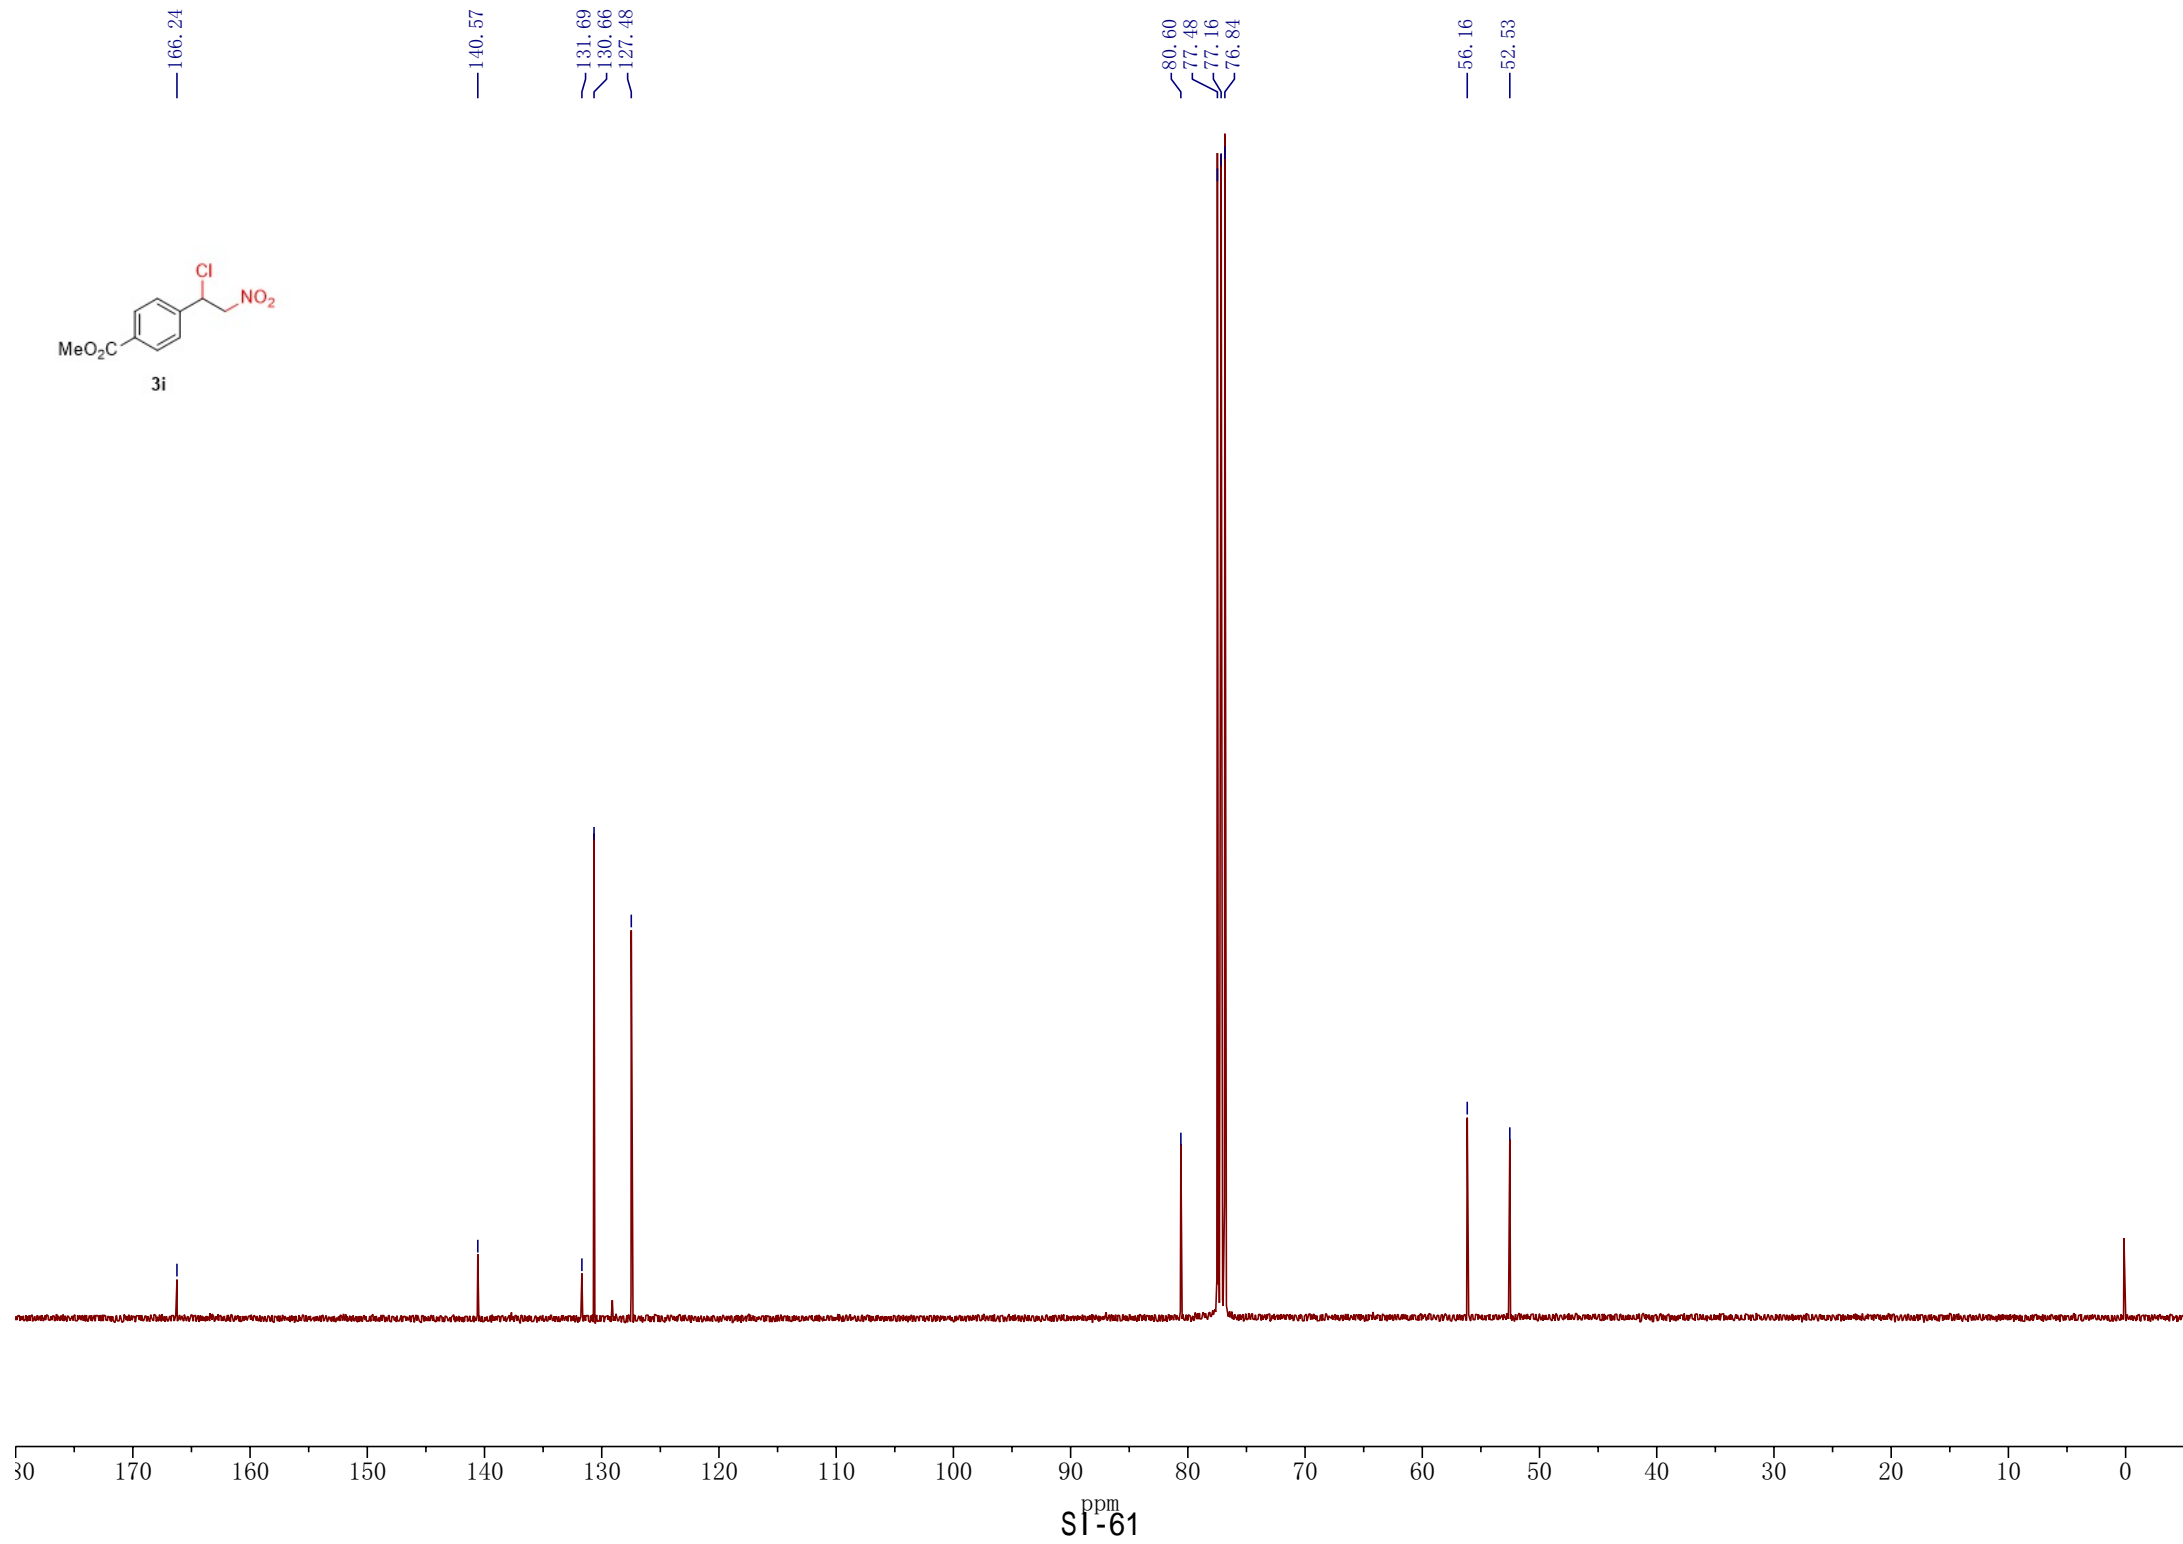

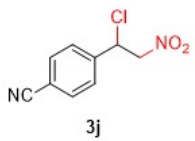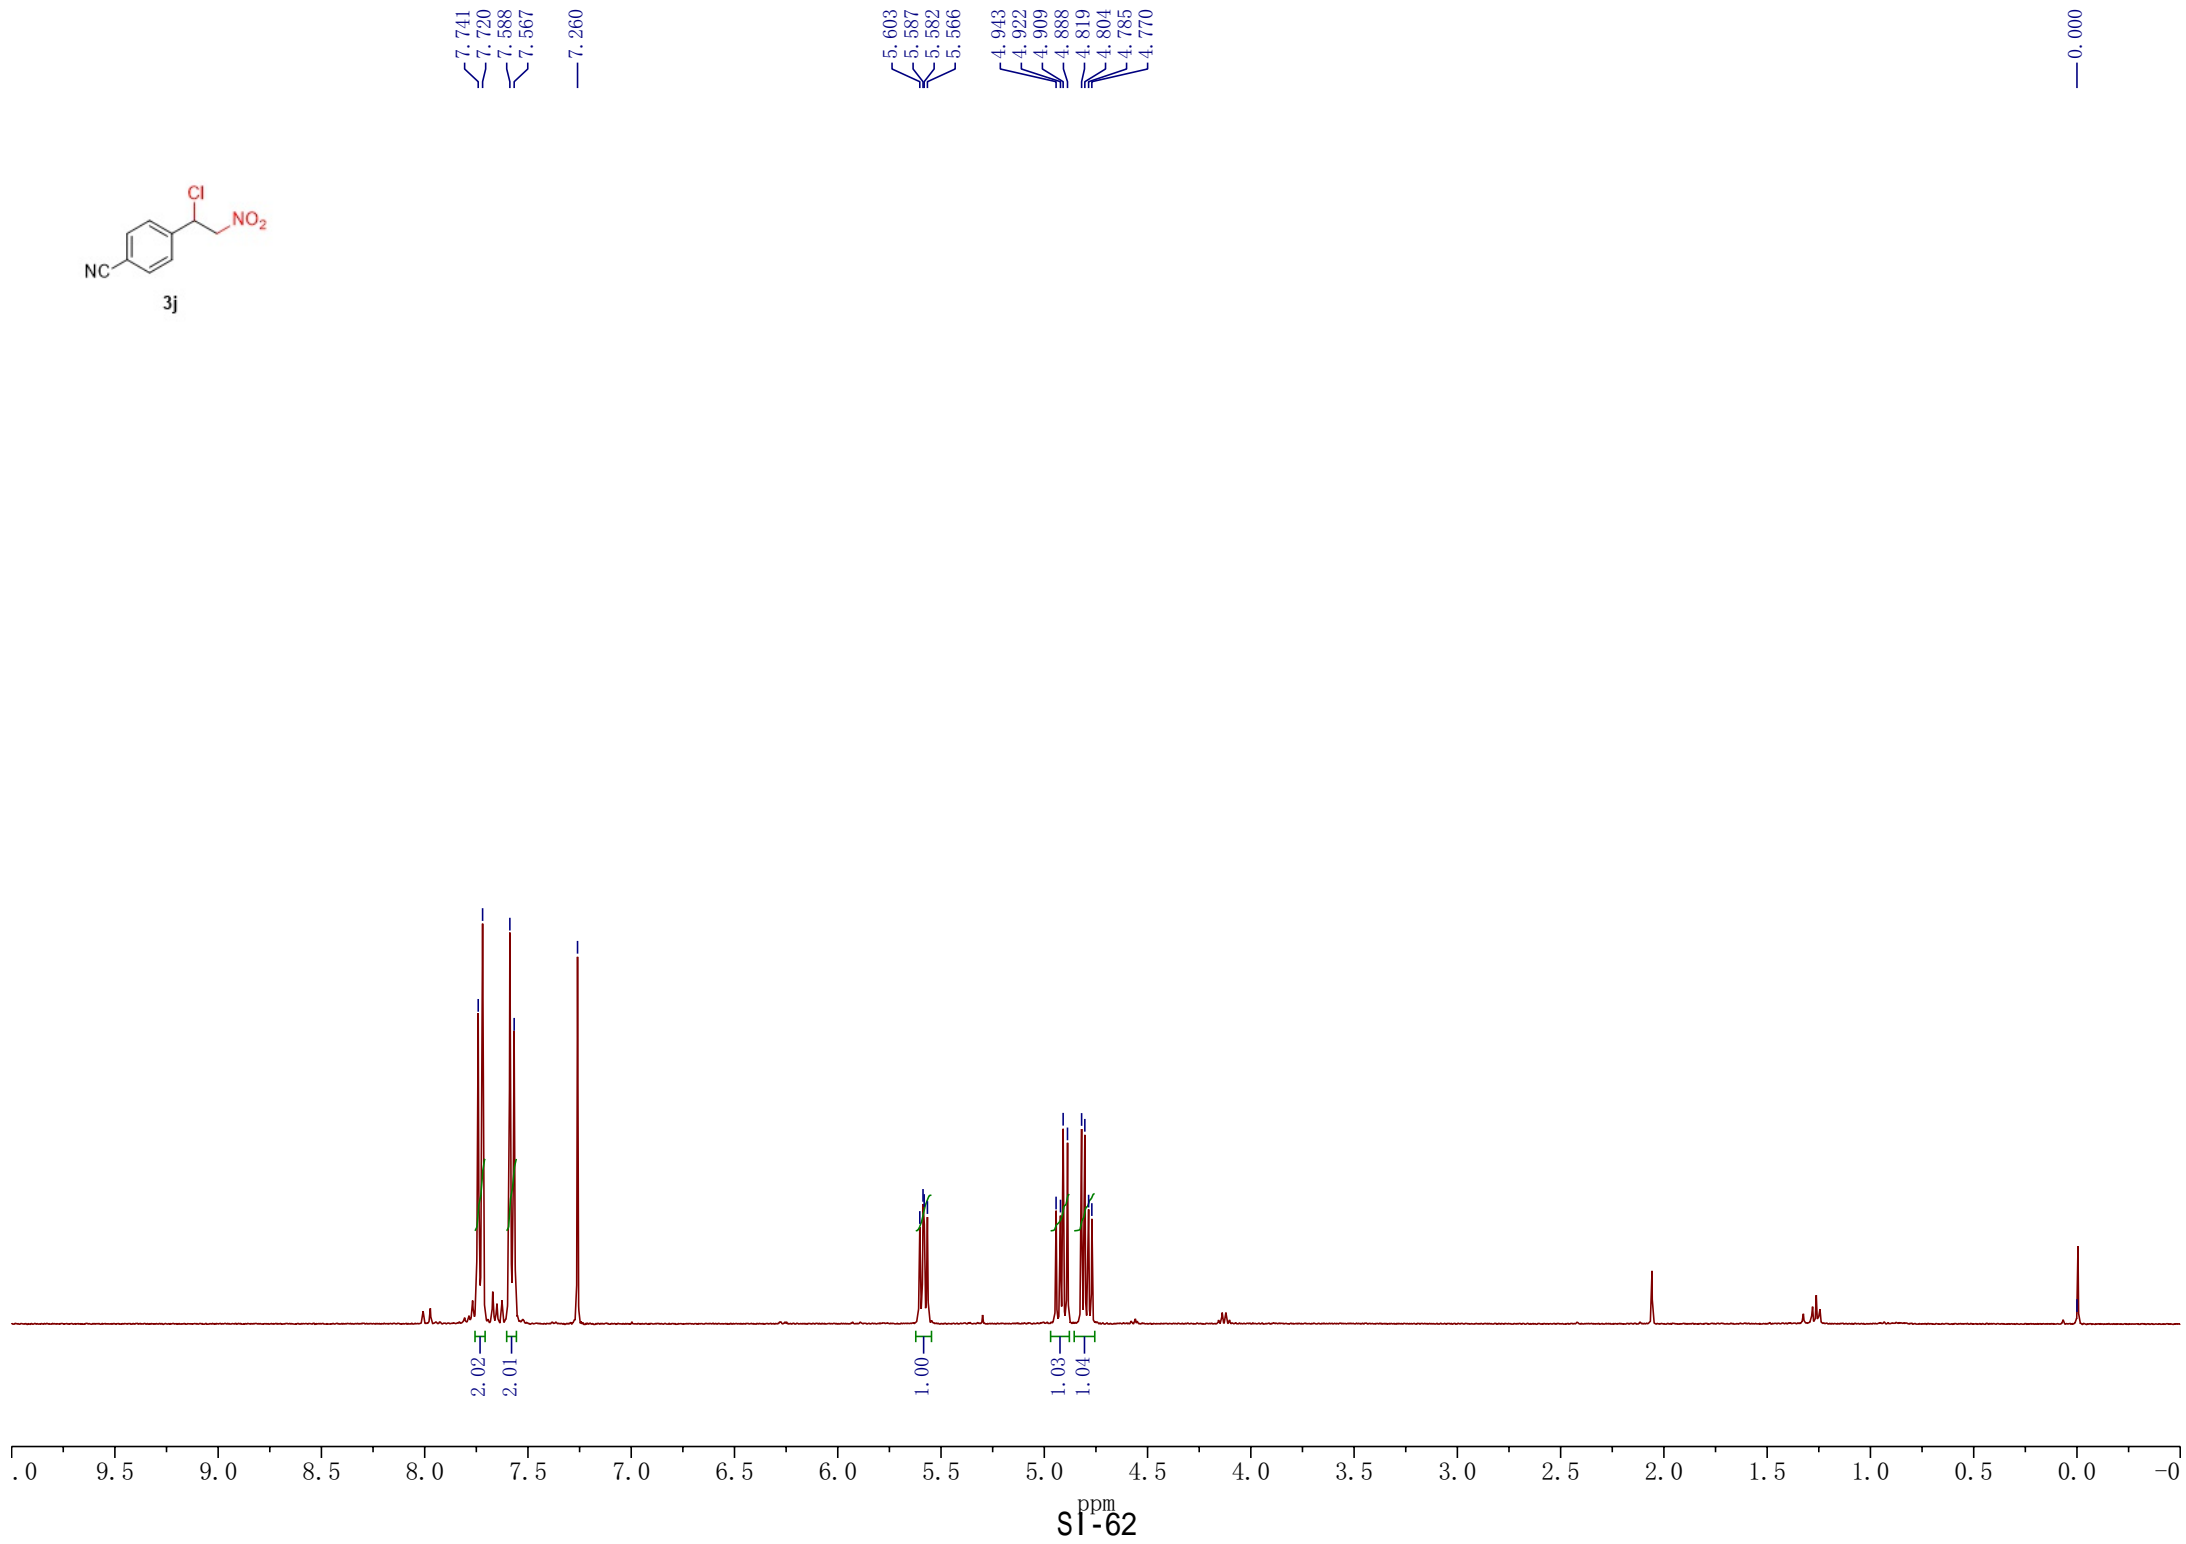

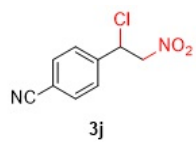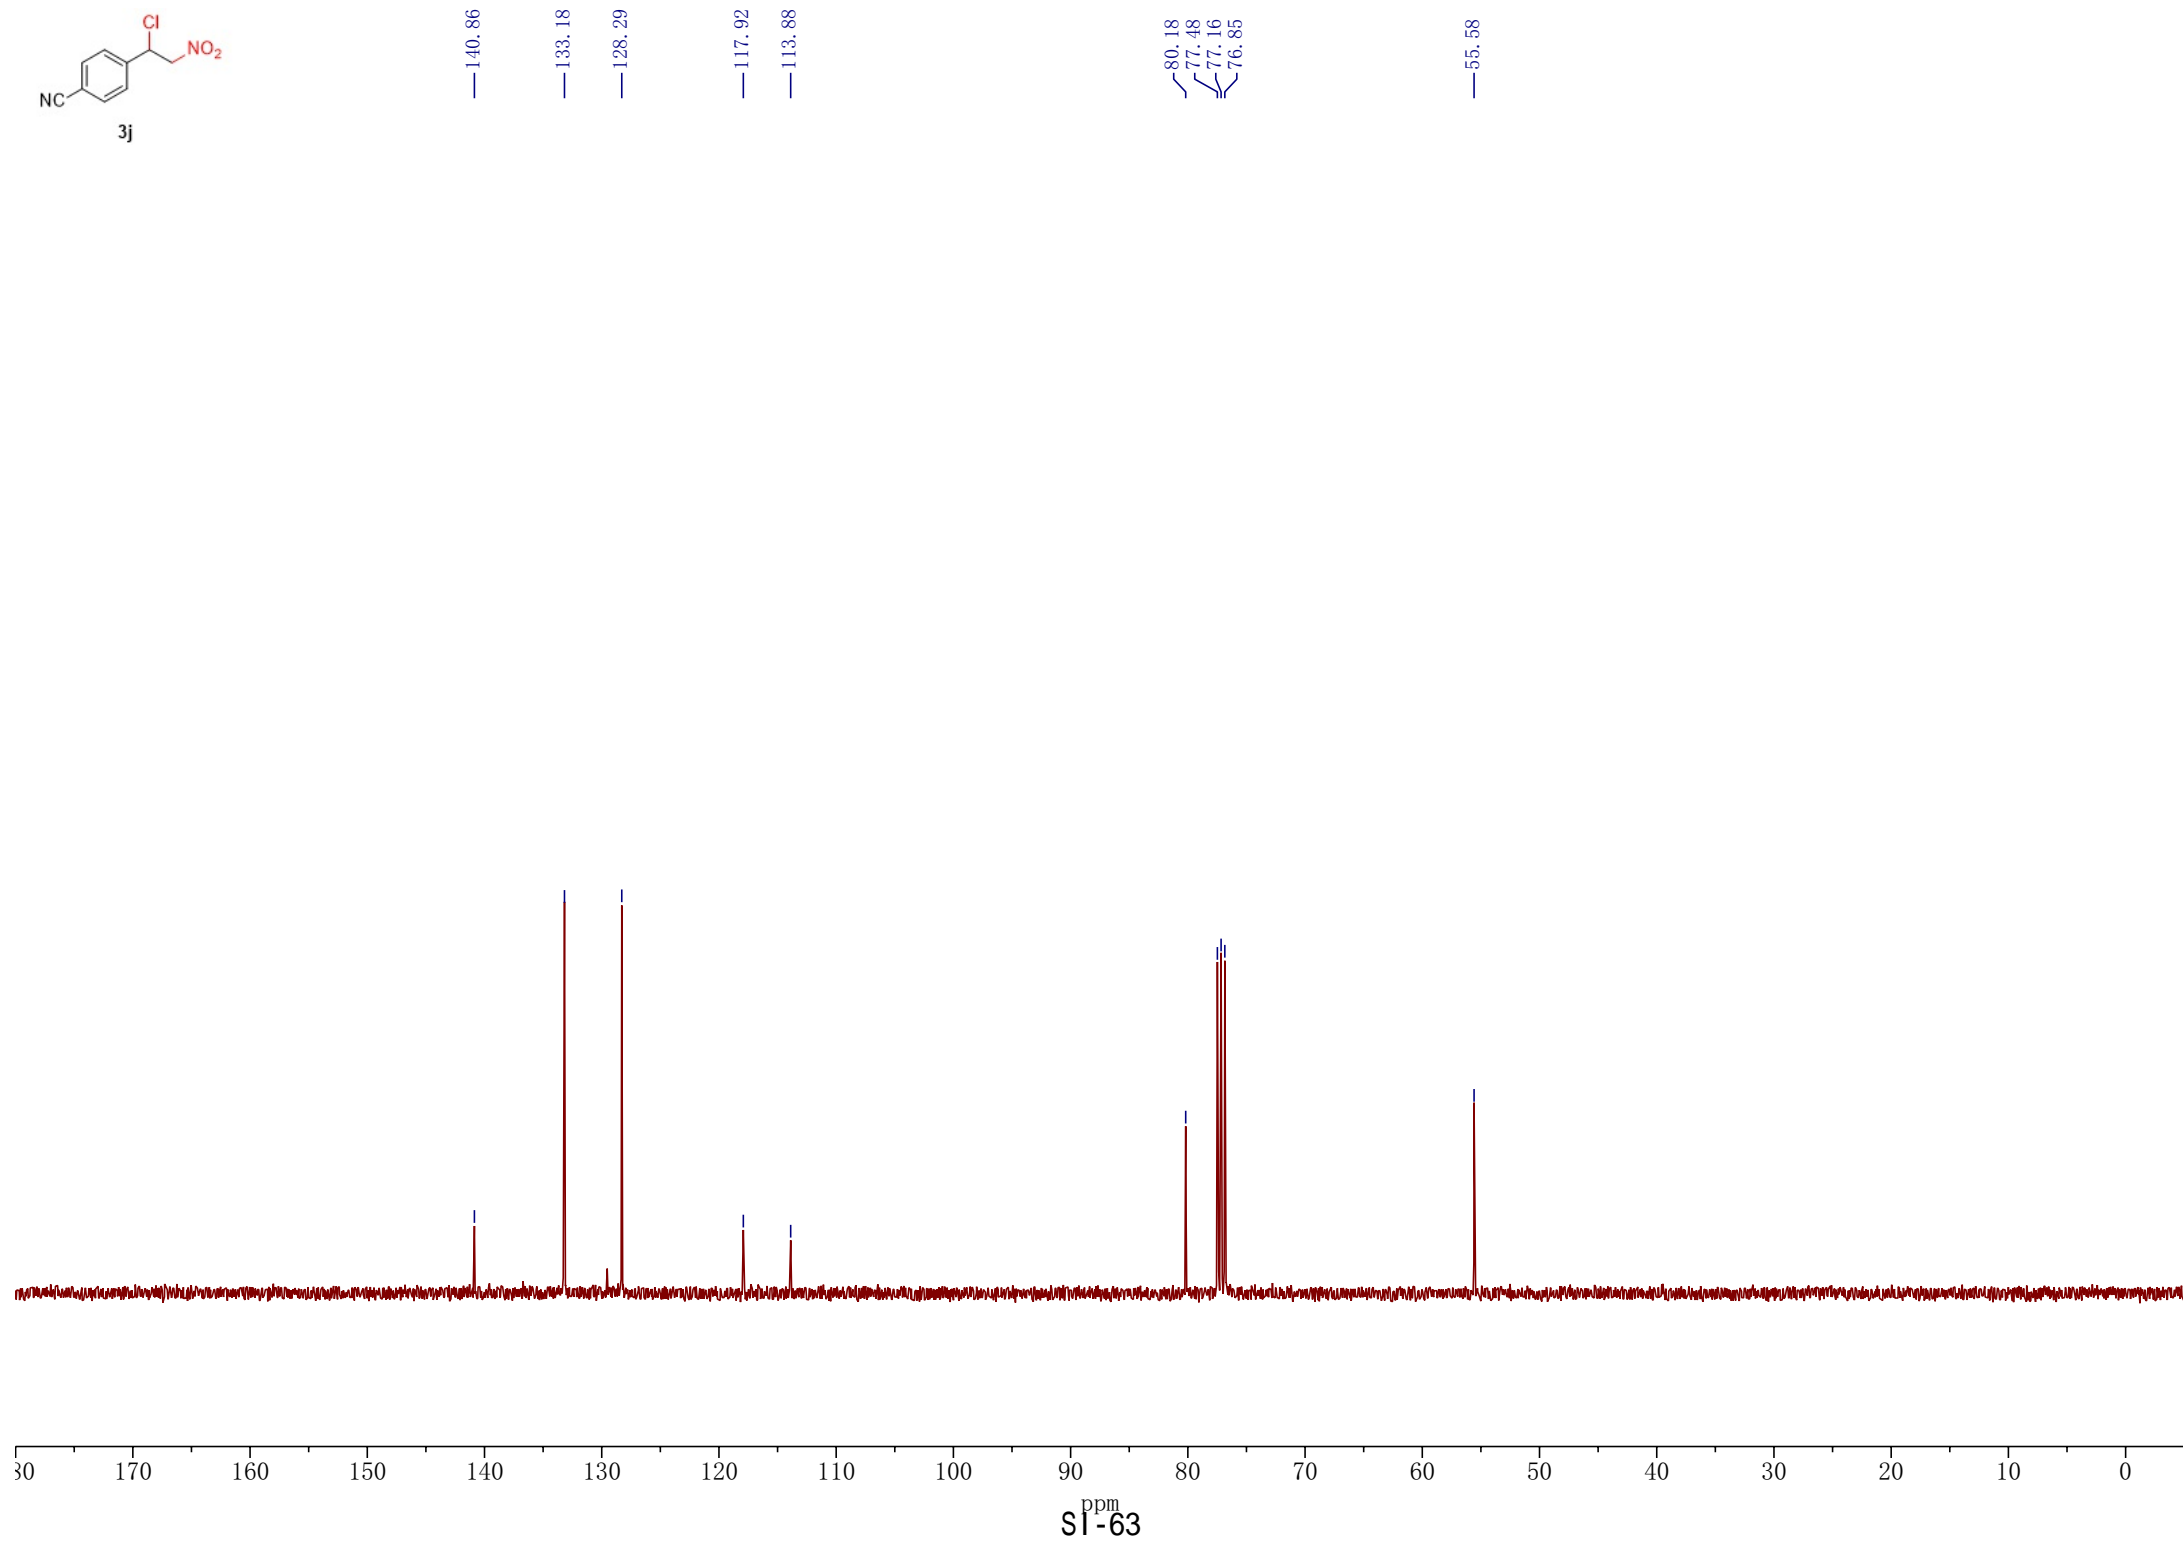

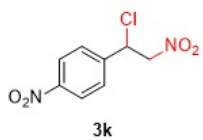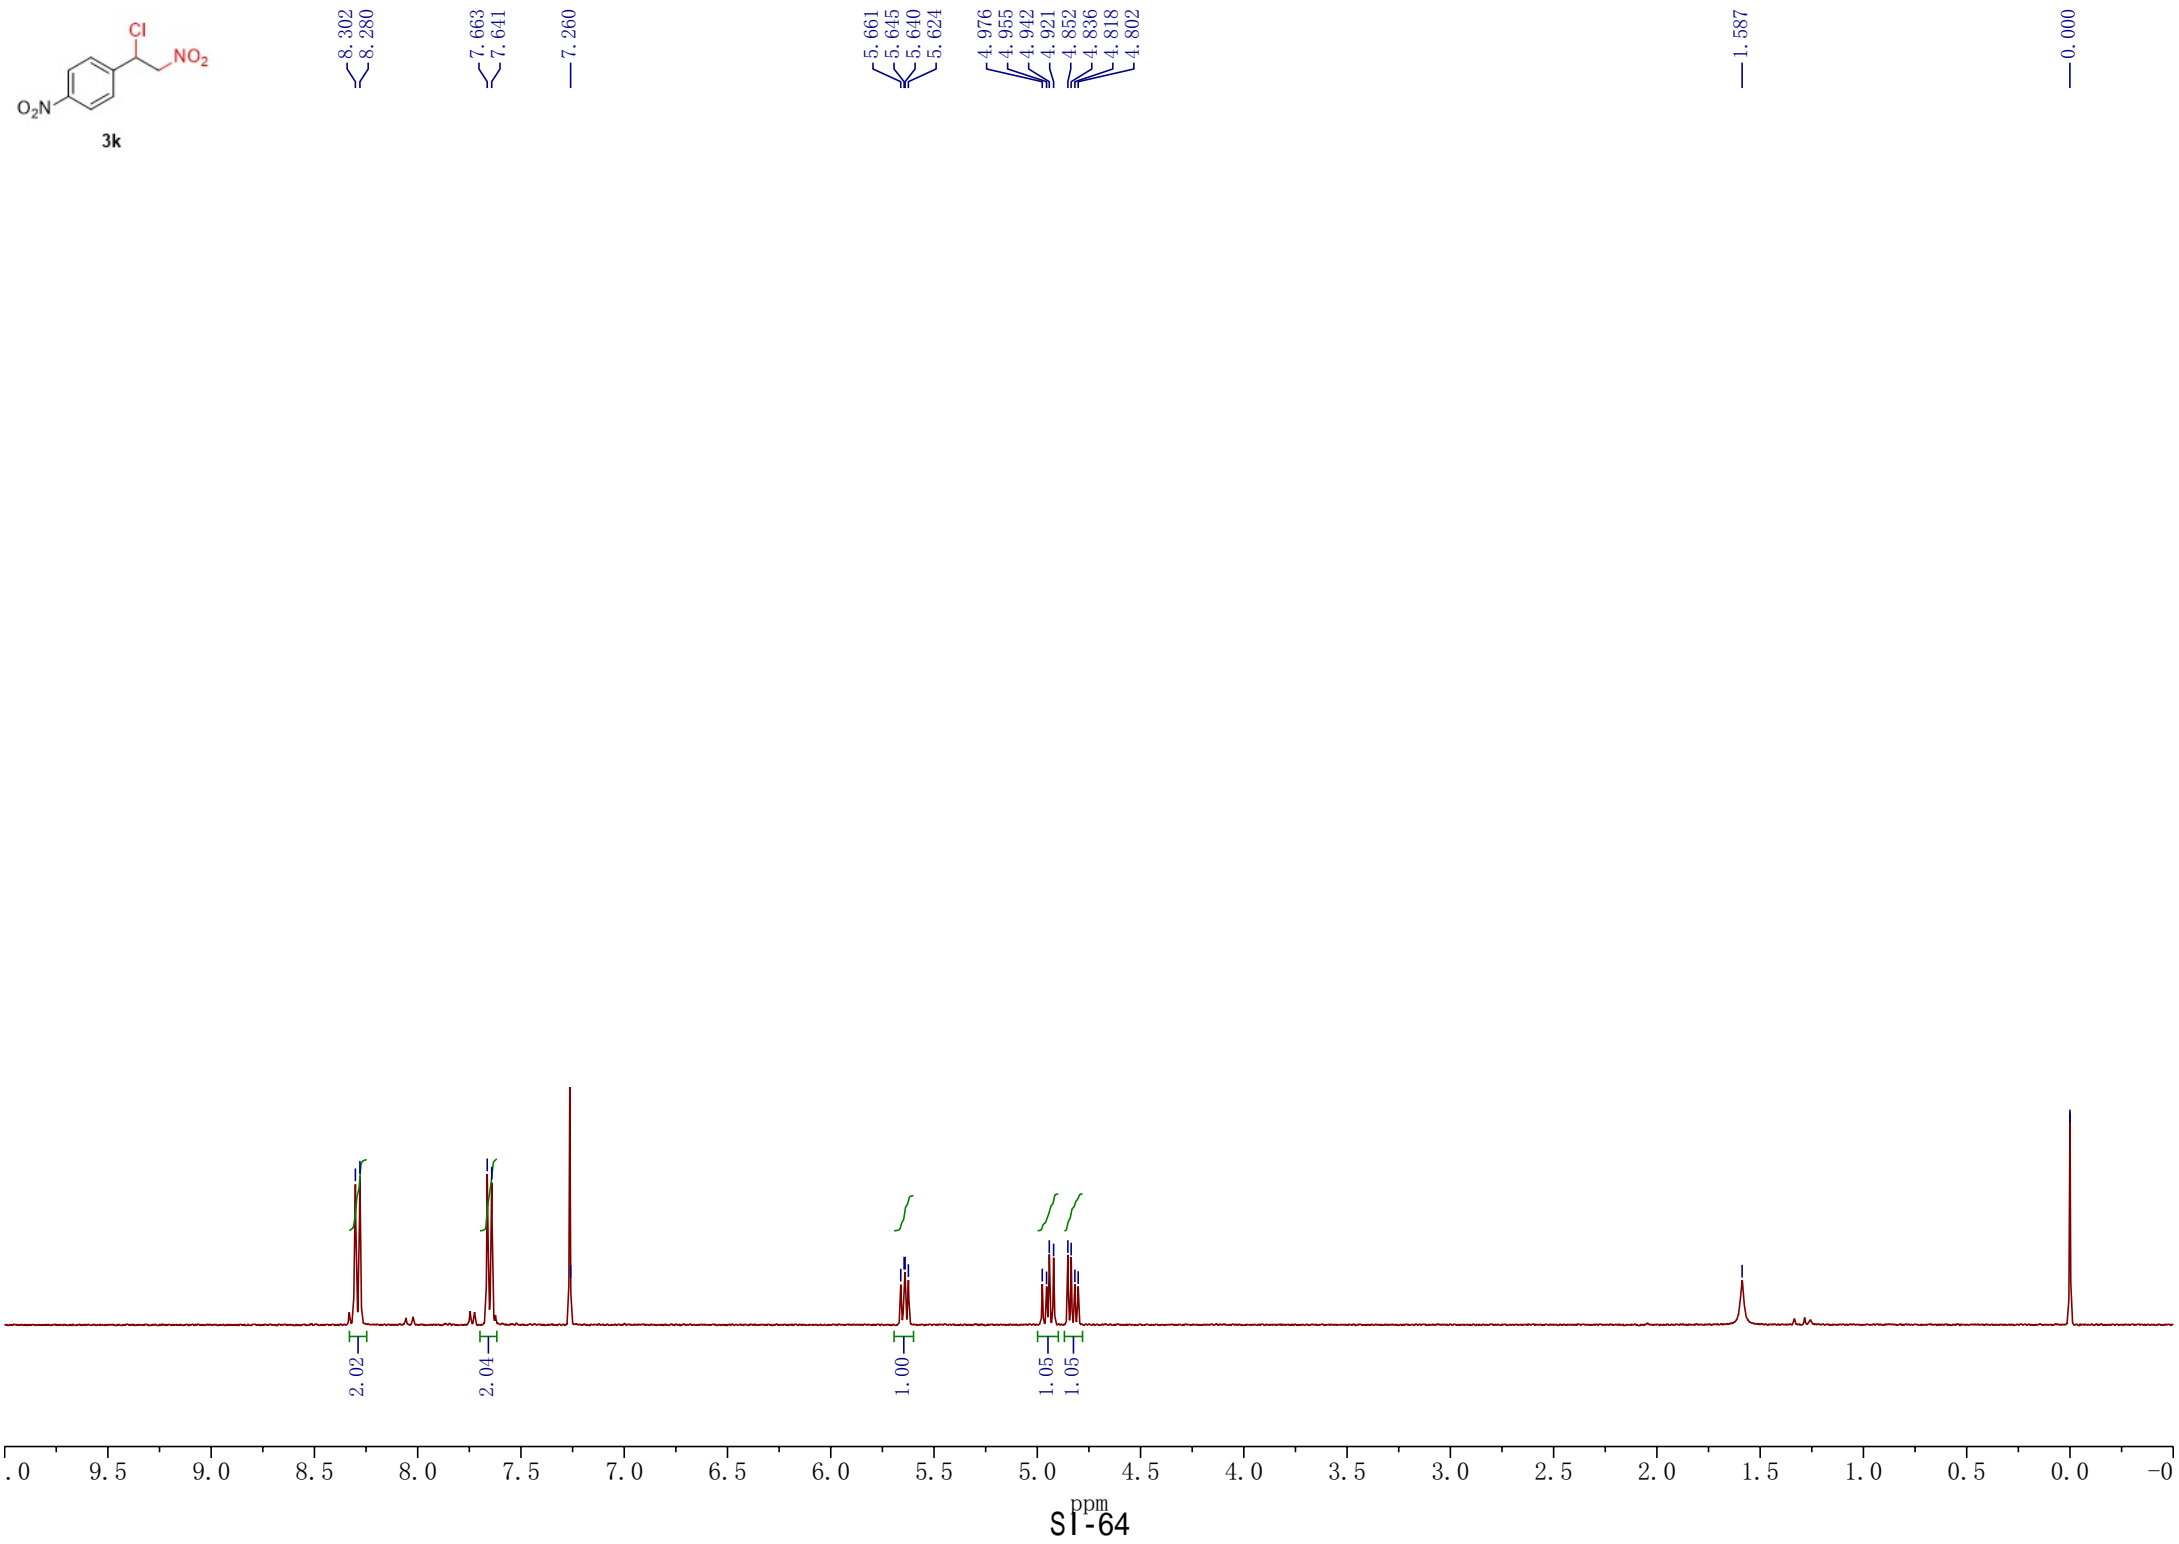



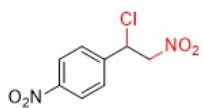

3k

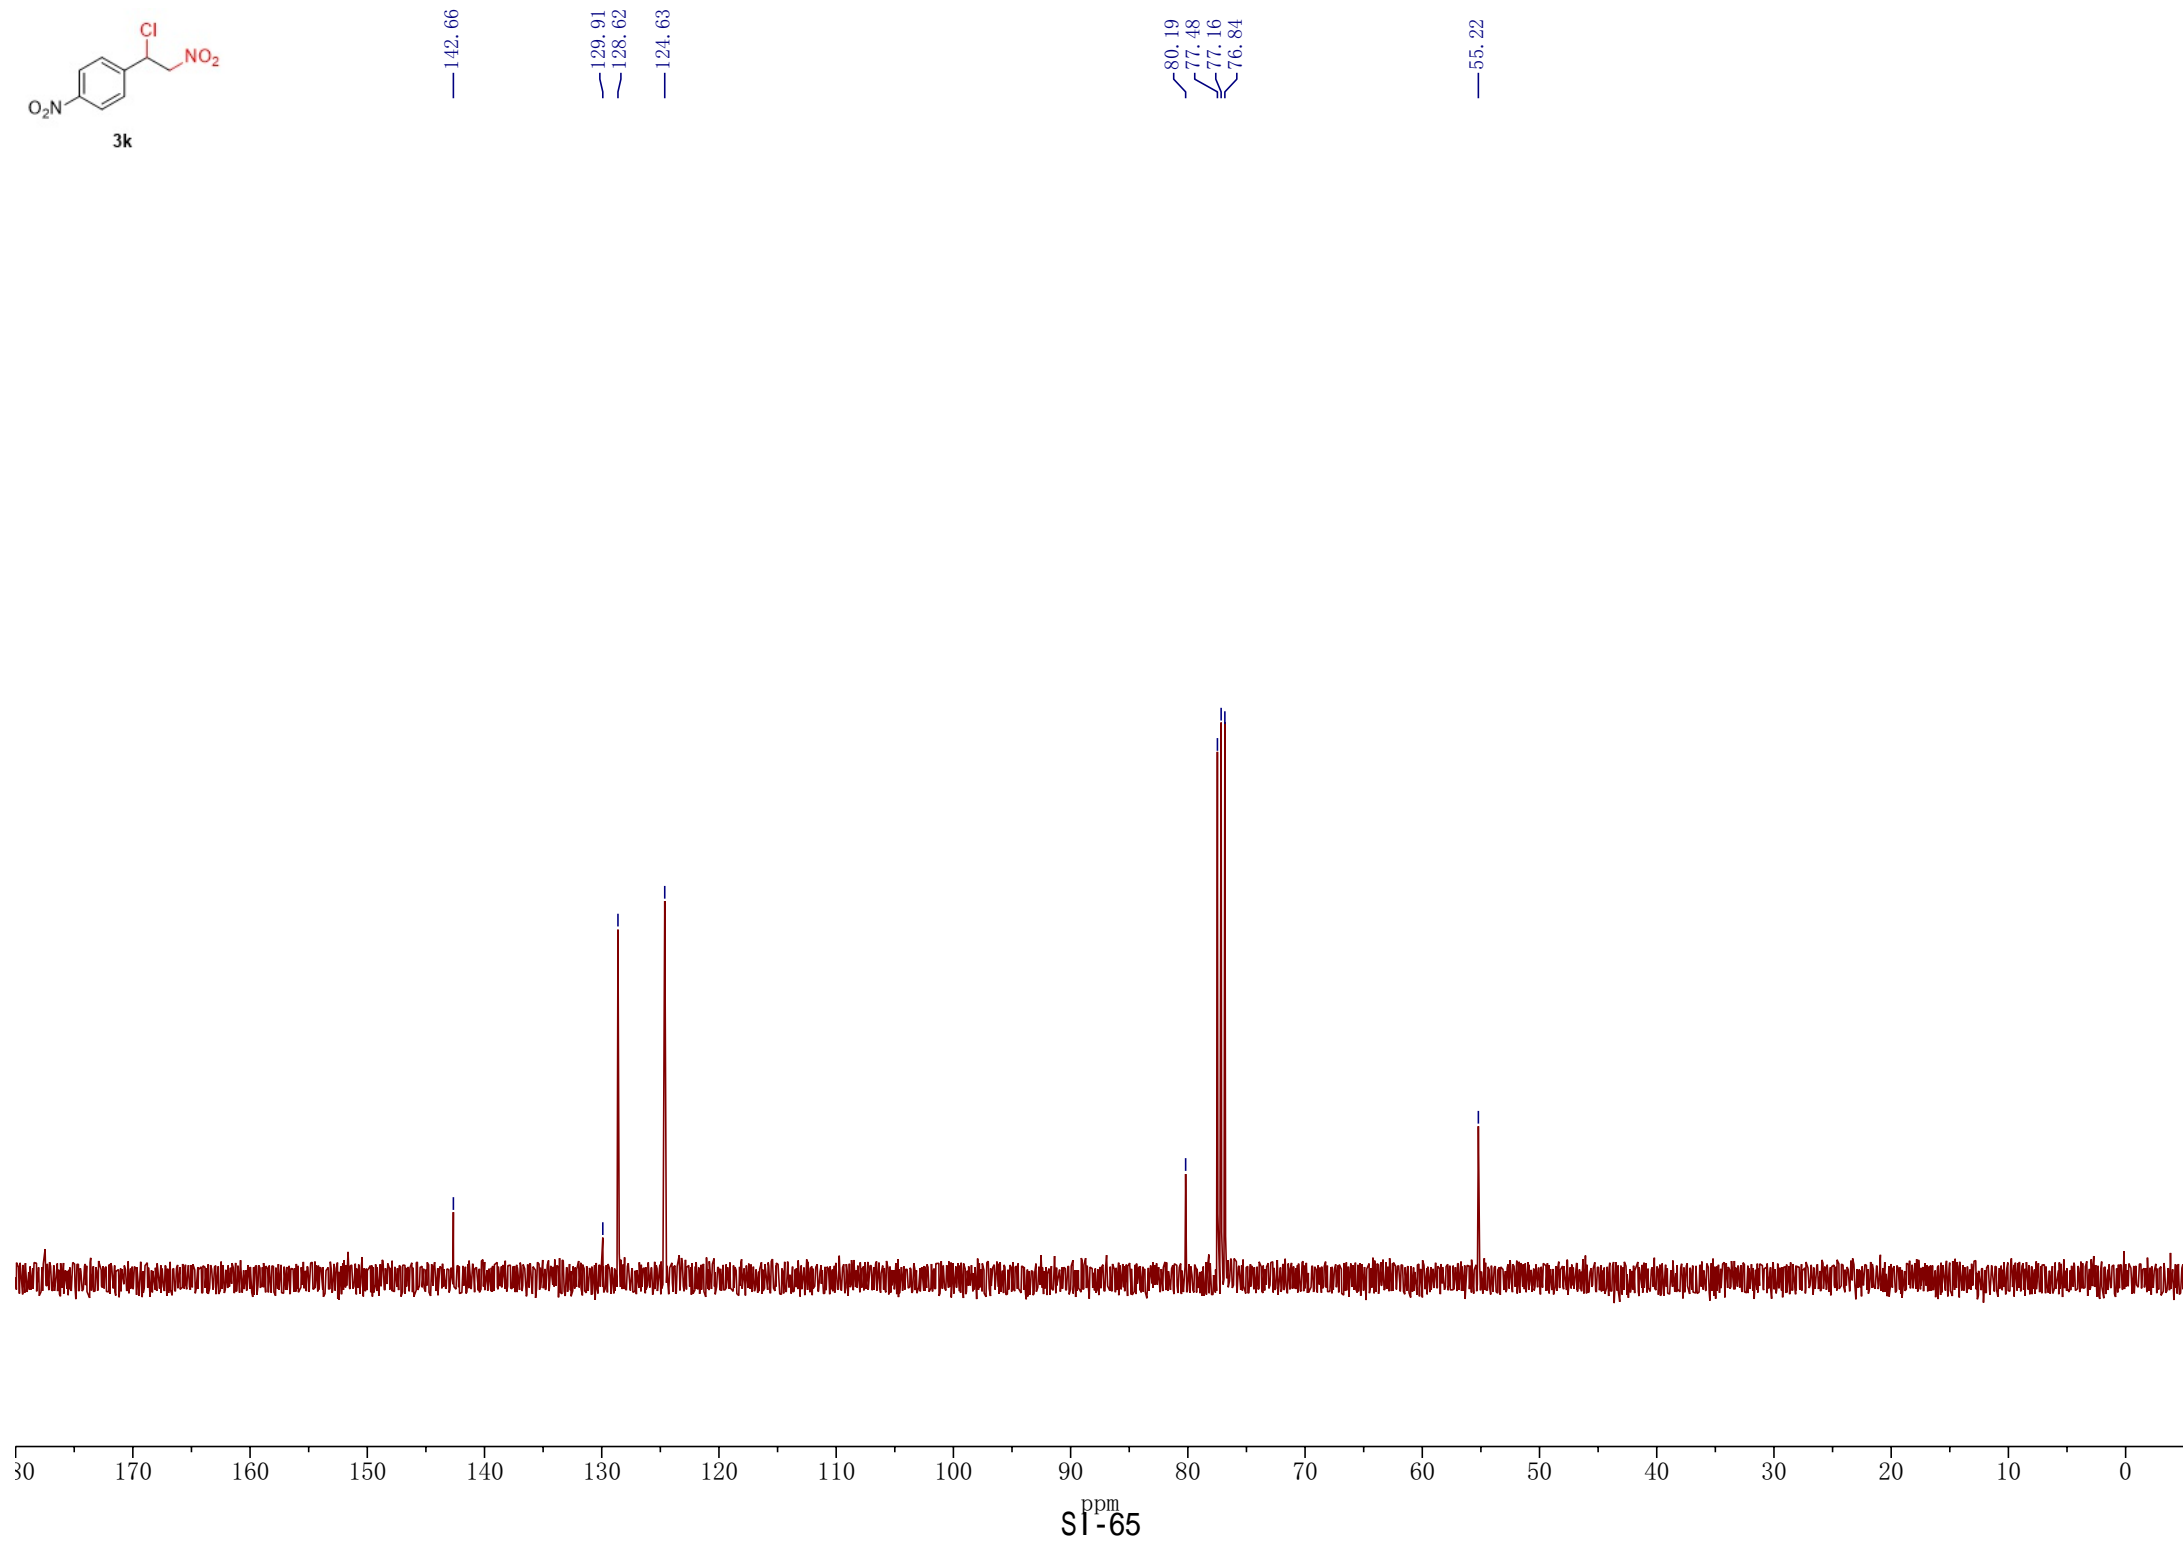

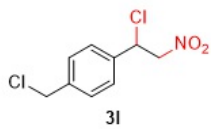

7.460  
7.437  
7.416  
7.280

5.581  
5.566  
5.558  
5.544

4.929  
4.907  
4.895  
4.873  
4.798  
4.784  
4.765  
4.750  
4.583

0.000

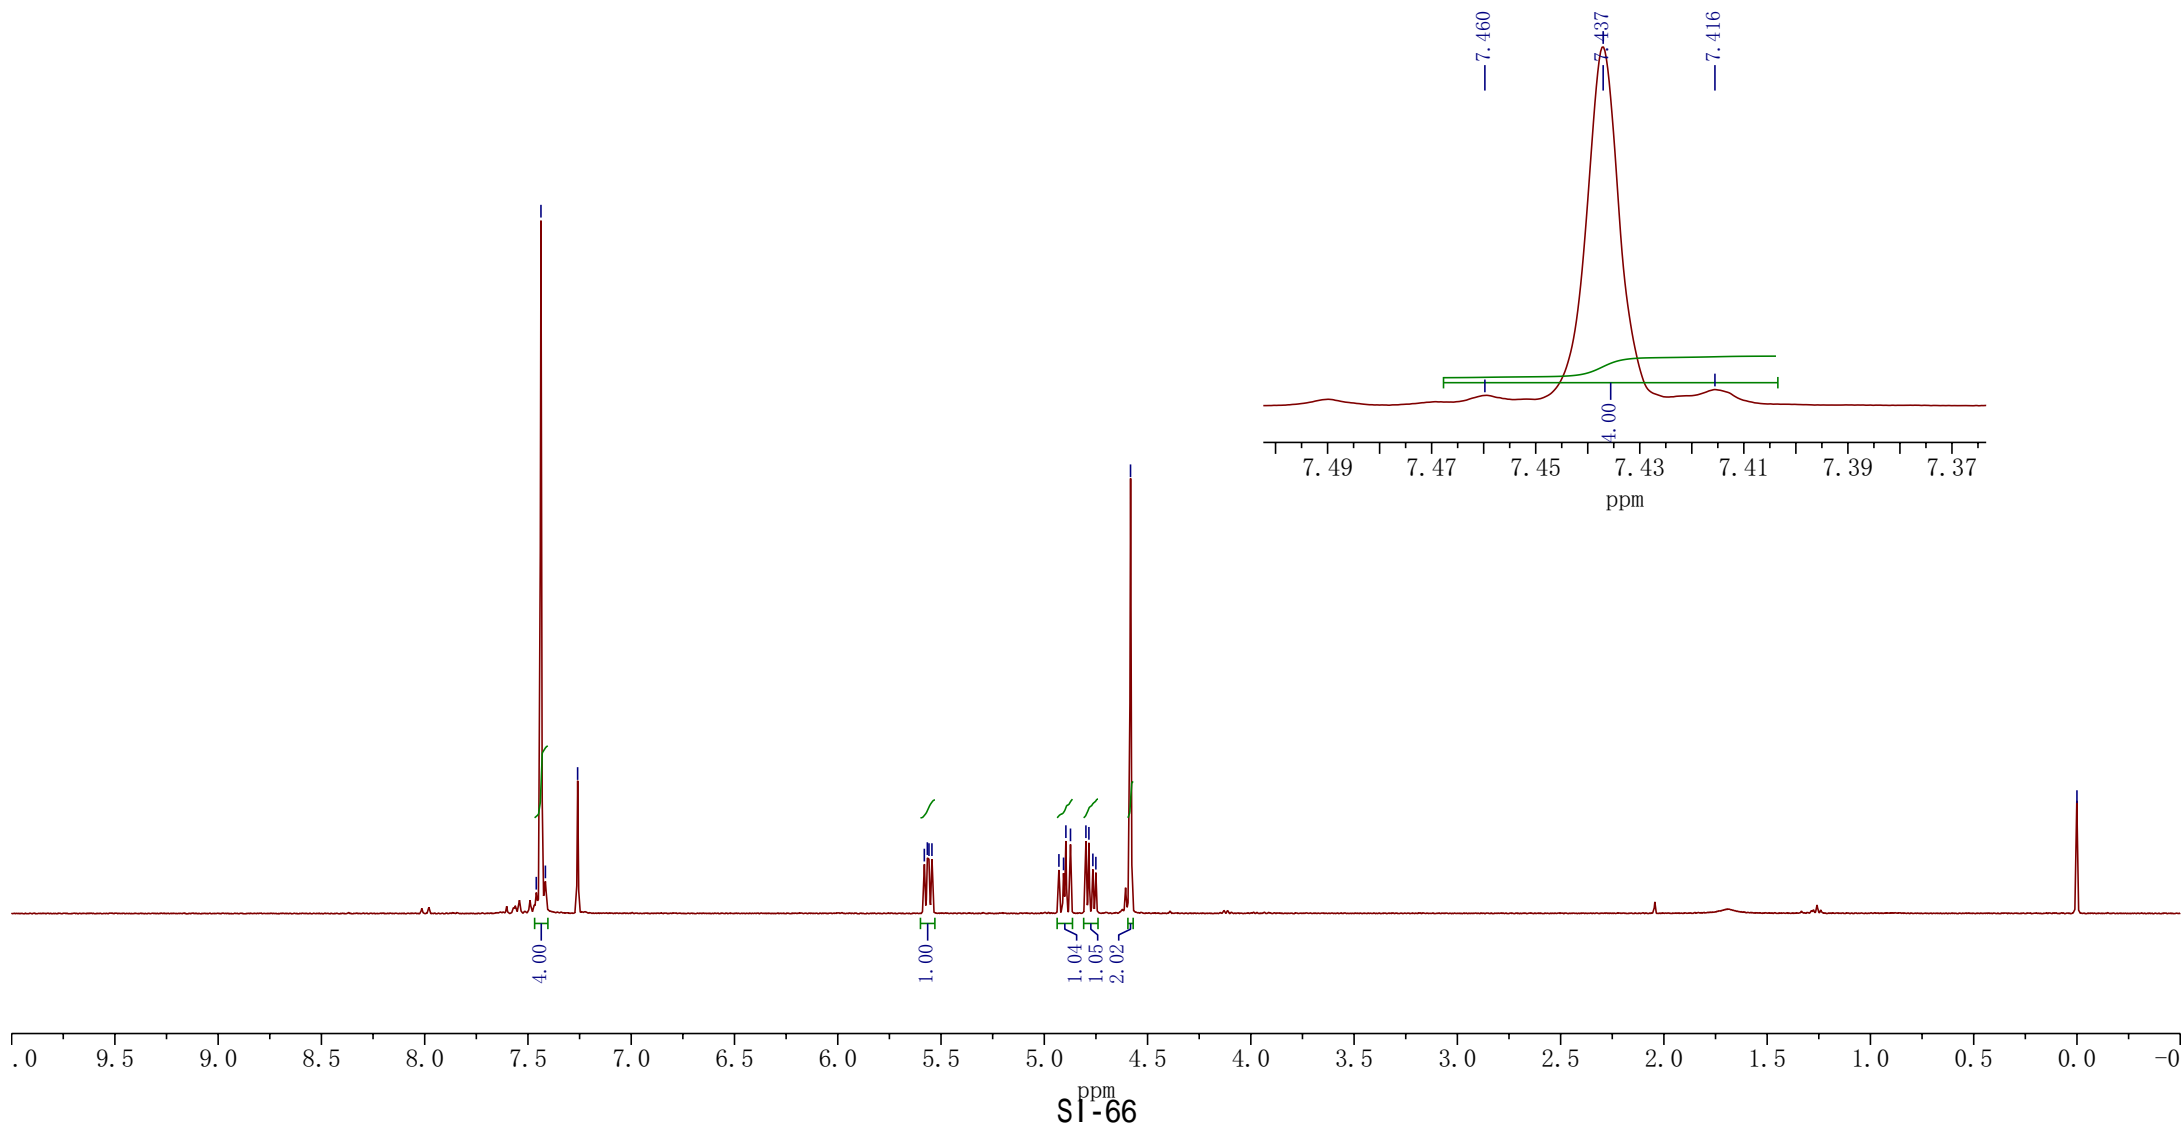

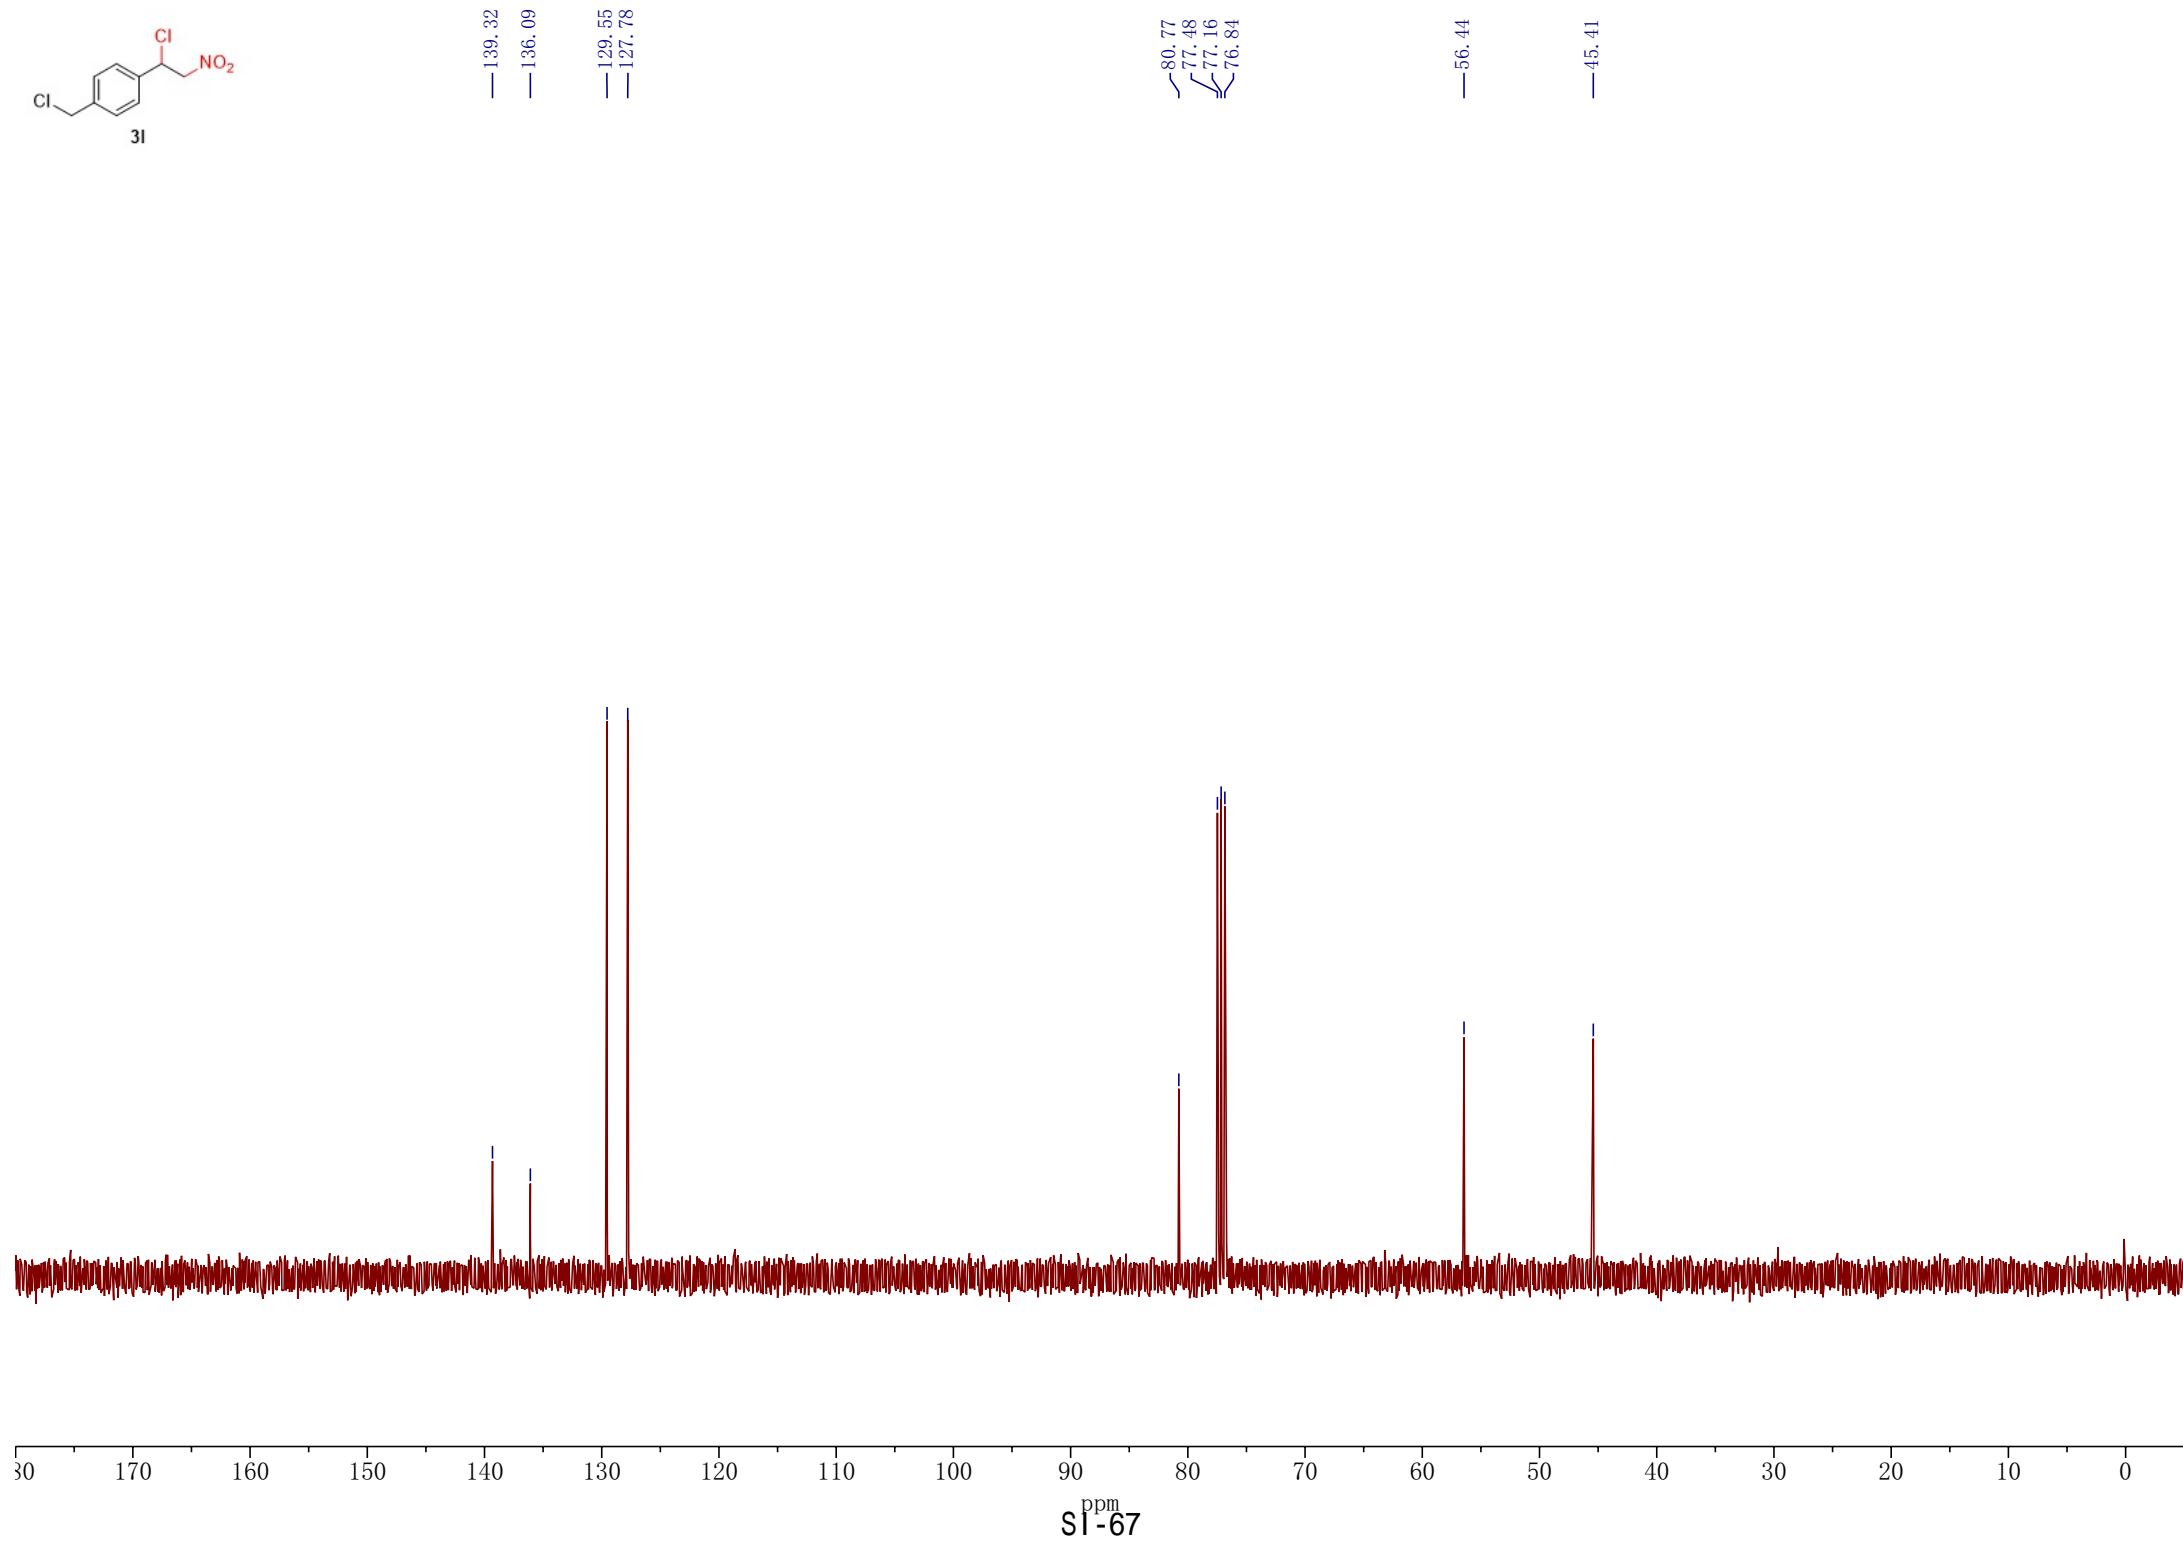

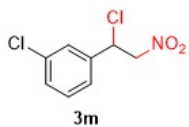

7.446  
7.442  
7.437  
7.398  
7.393  
7.388  
7.379  
7.374  
7.369  
7.355  
7.337  
7.328  
7.323  
7.318  
7.311  
7.306  
7.301  
7.260

5.539  
5.524  
5.517  
5.502  
4.916  
4.894  
4.882  
4.860  
4.795  
4.780  
4.761  
4.747

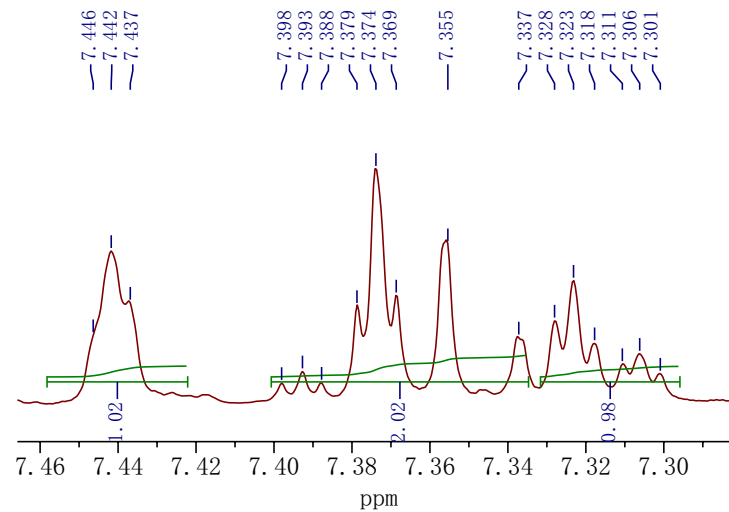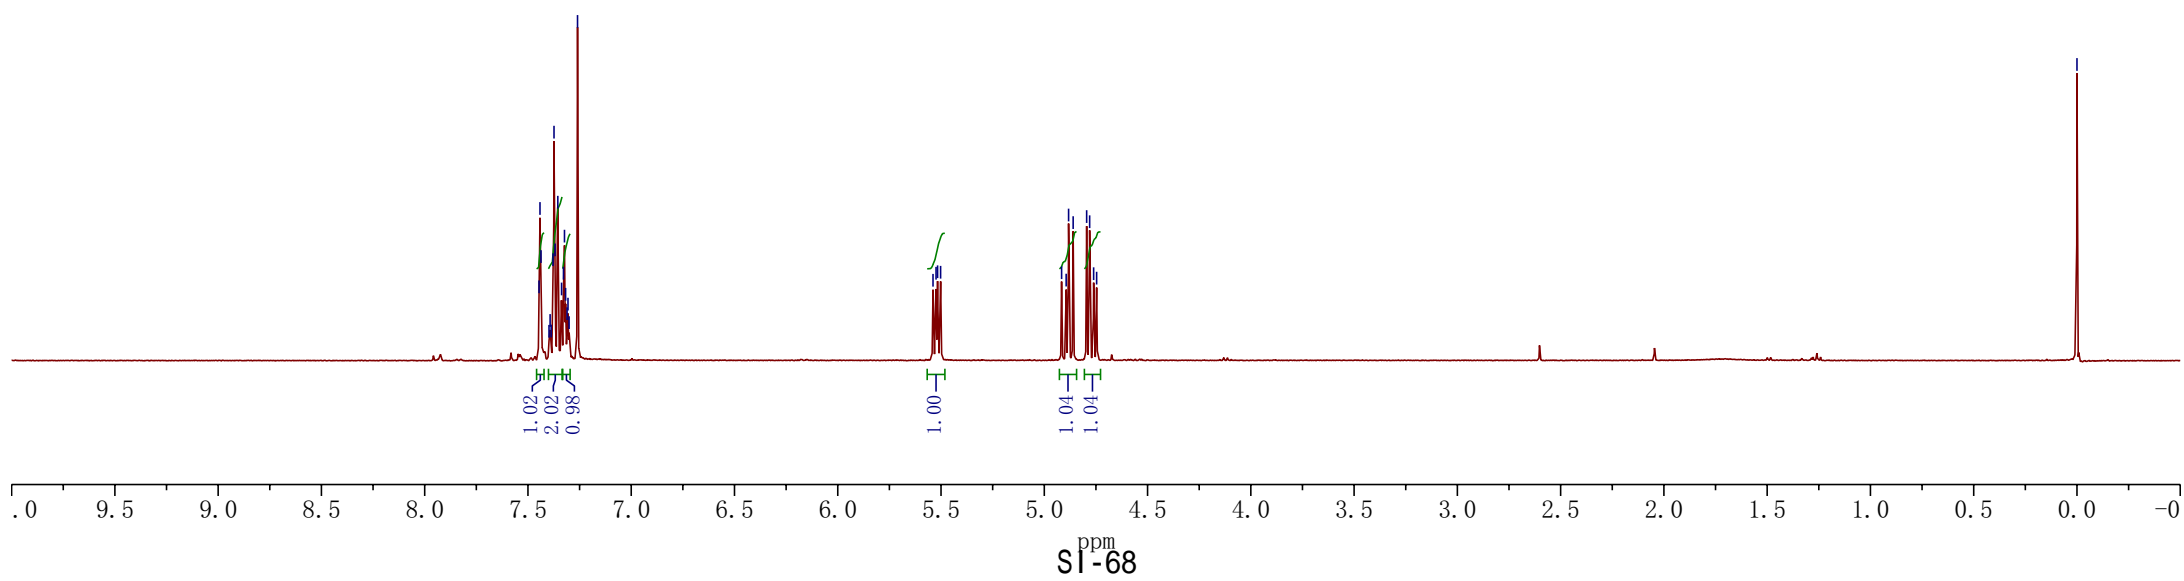



— 137.87  
— 135.35  
— 130.70  
— 130.16  
— 127.64  
— 125.53

— 80.64  
— 77.48  
— 77.16  
— 76.84

— 55.98

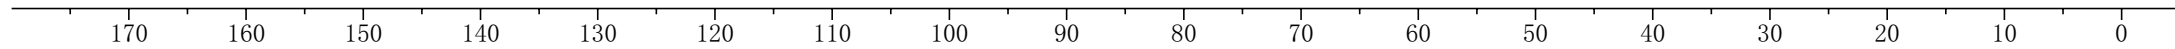

ppm  
SI-69

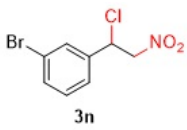

7.600  
7.595  
7.590  
7.547  
7.544  
7.542  
7.539  
7.527  
7.525  
7.523  
7.520  
7.379  
7.376  
7.372  
7.360  
7.356  
7.352  
7.311  
7.292  
7.272  
7.260

5.528  
5.513  
5.506  
5.491  
4.913  
4.891  
4.879  
4.857  
4.792  
4.777  
4.758  
4.743

1.562

-0.000

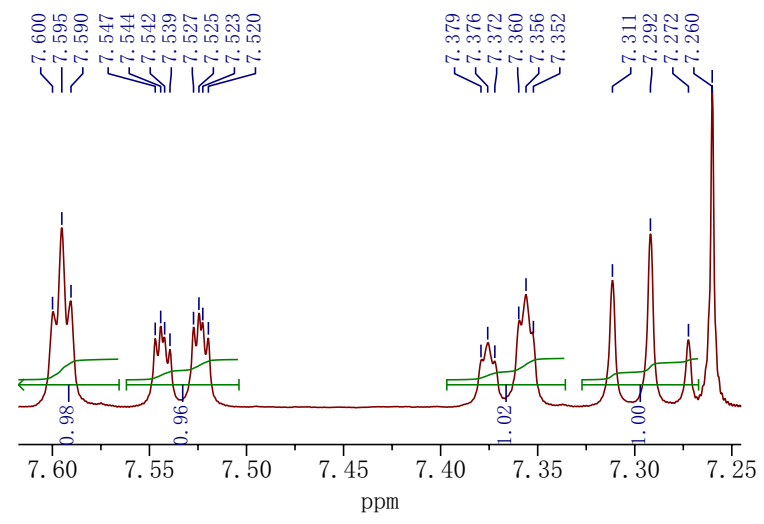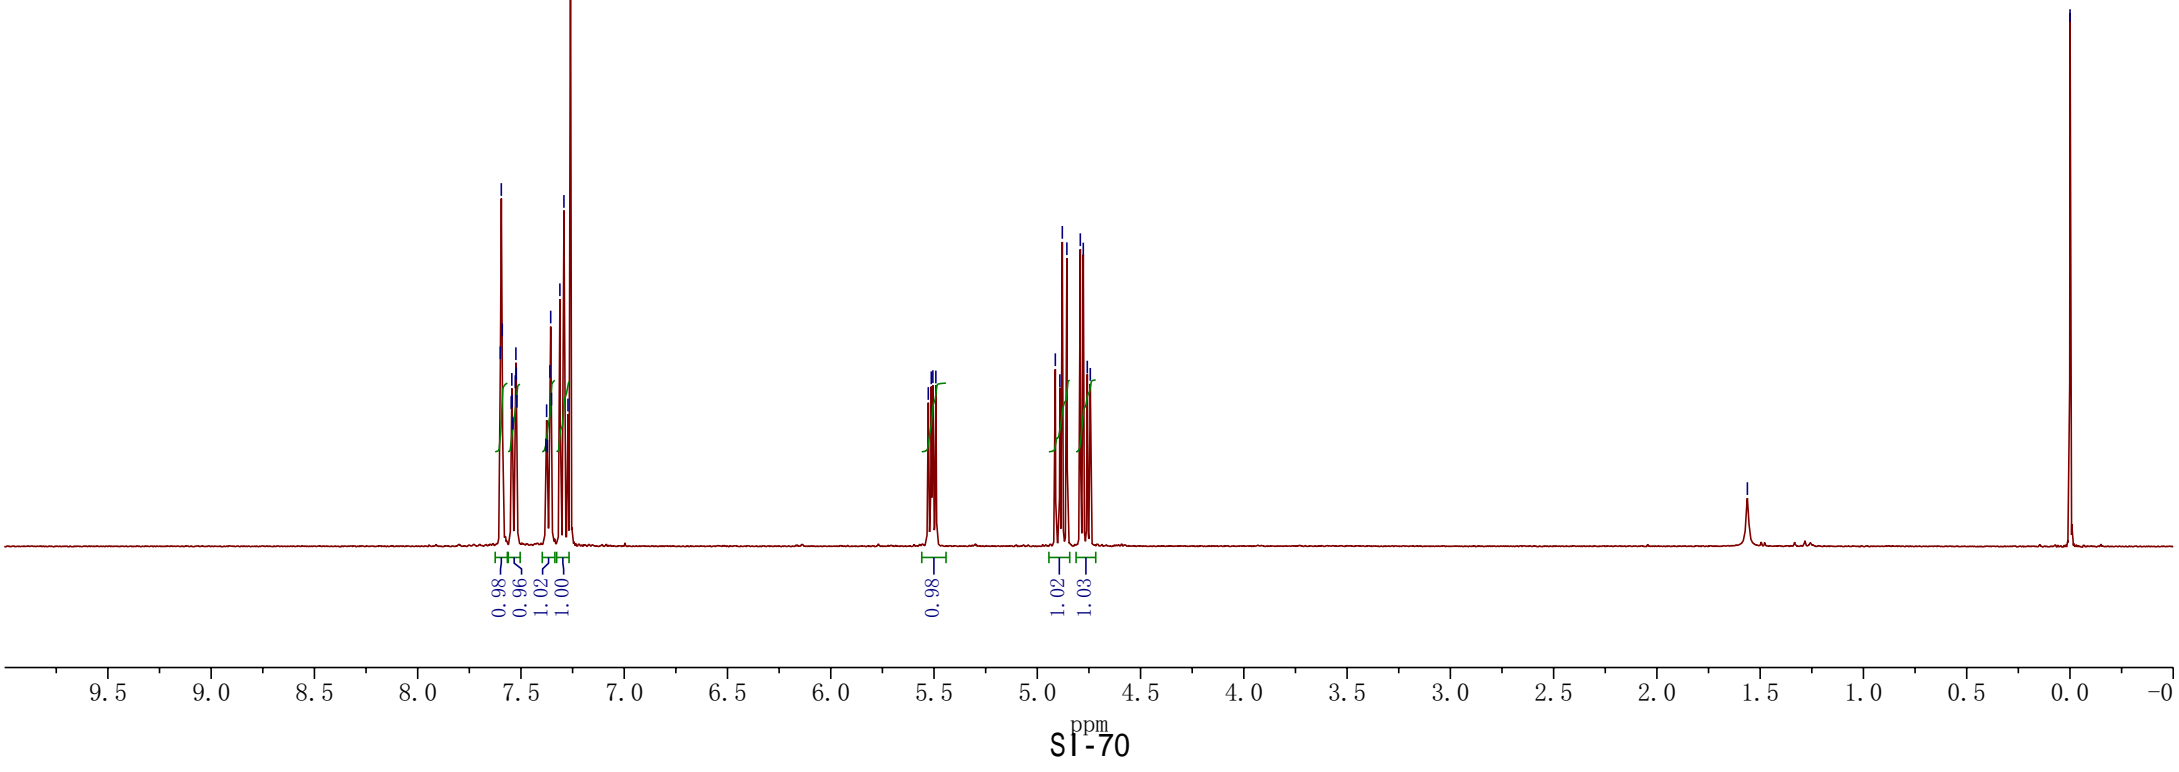

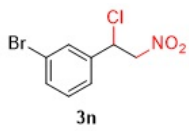

— 138.07  
— 133.08  
— 130.92  
— 130.51  
— 126.00  
— 123.31

— 80.63  
— 77.48  
— 77.16  
— 76.84

— 55.91

30 170 160 150 140 130 120 110 100 90 80 70 60 50 40 30 20 10 0

ppm  
SI-71

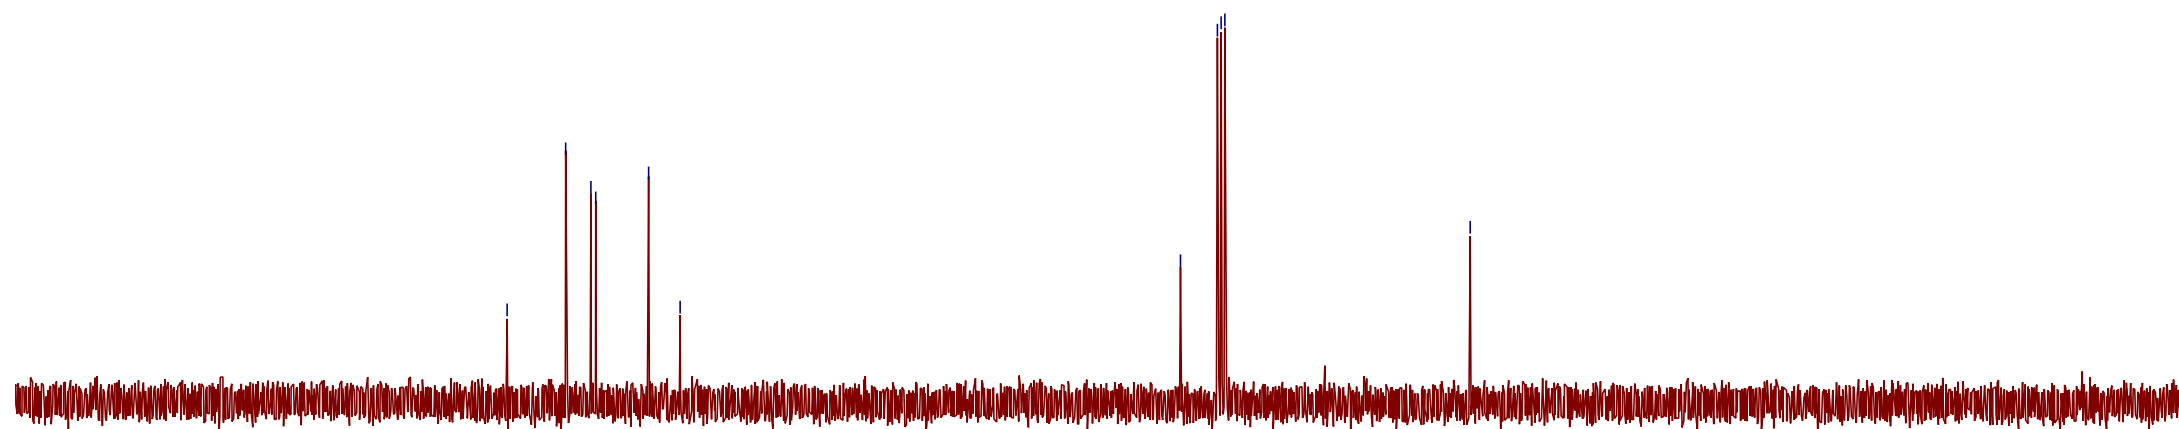

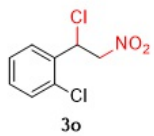

7.627  
7.621  
7.608  
7.603  
7.453  
7.448  
7.445  
7.435  
7.429  
7.393  
7.388  
7.375  
7.370  
7.363  
7.356  
7.351  
7.345  
7.340  
7.326  
7.321  
7.260  
6.122  
6.109  
6.101  
6.087

4.879  
4.866  
4.845  
4.840  
4.832  
4.818  
4.806  
4.784

7.627  
7.621  
7.608  
7.603

7.453  
7.448  
7.445  
7.435  
7.429  
7.393  
7.388  
7.375  
7.370  
7.363  
7.356  
7.351  
7.345  
7.340  
7.326  
7.321

—1.554

—0.000

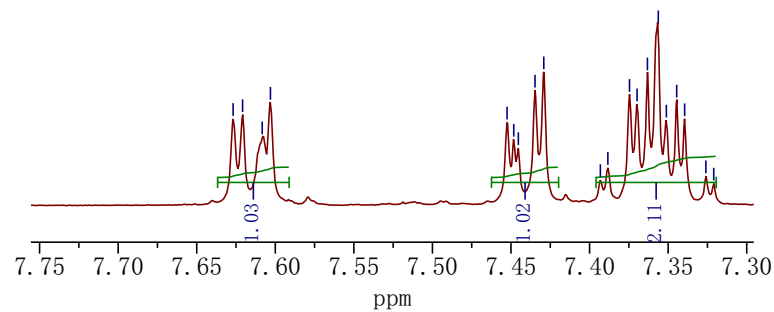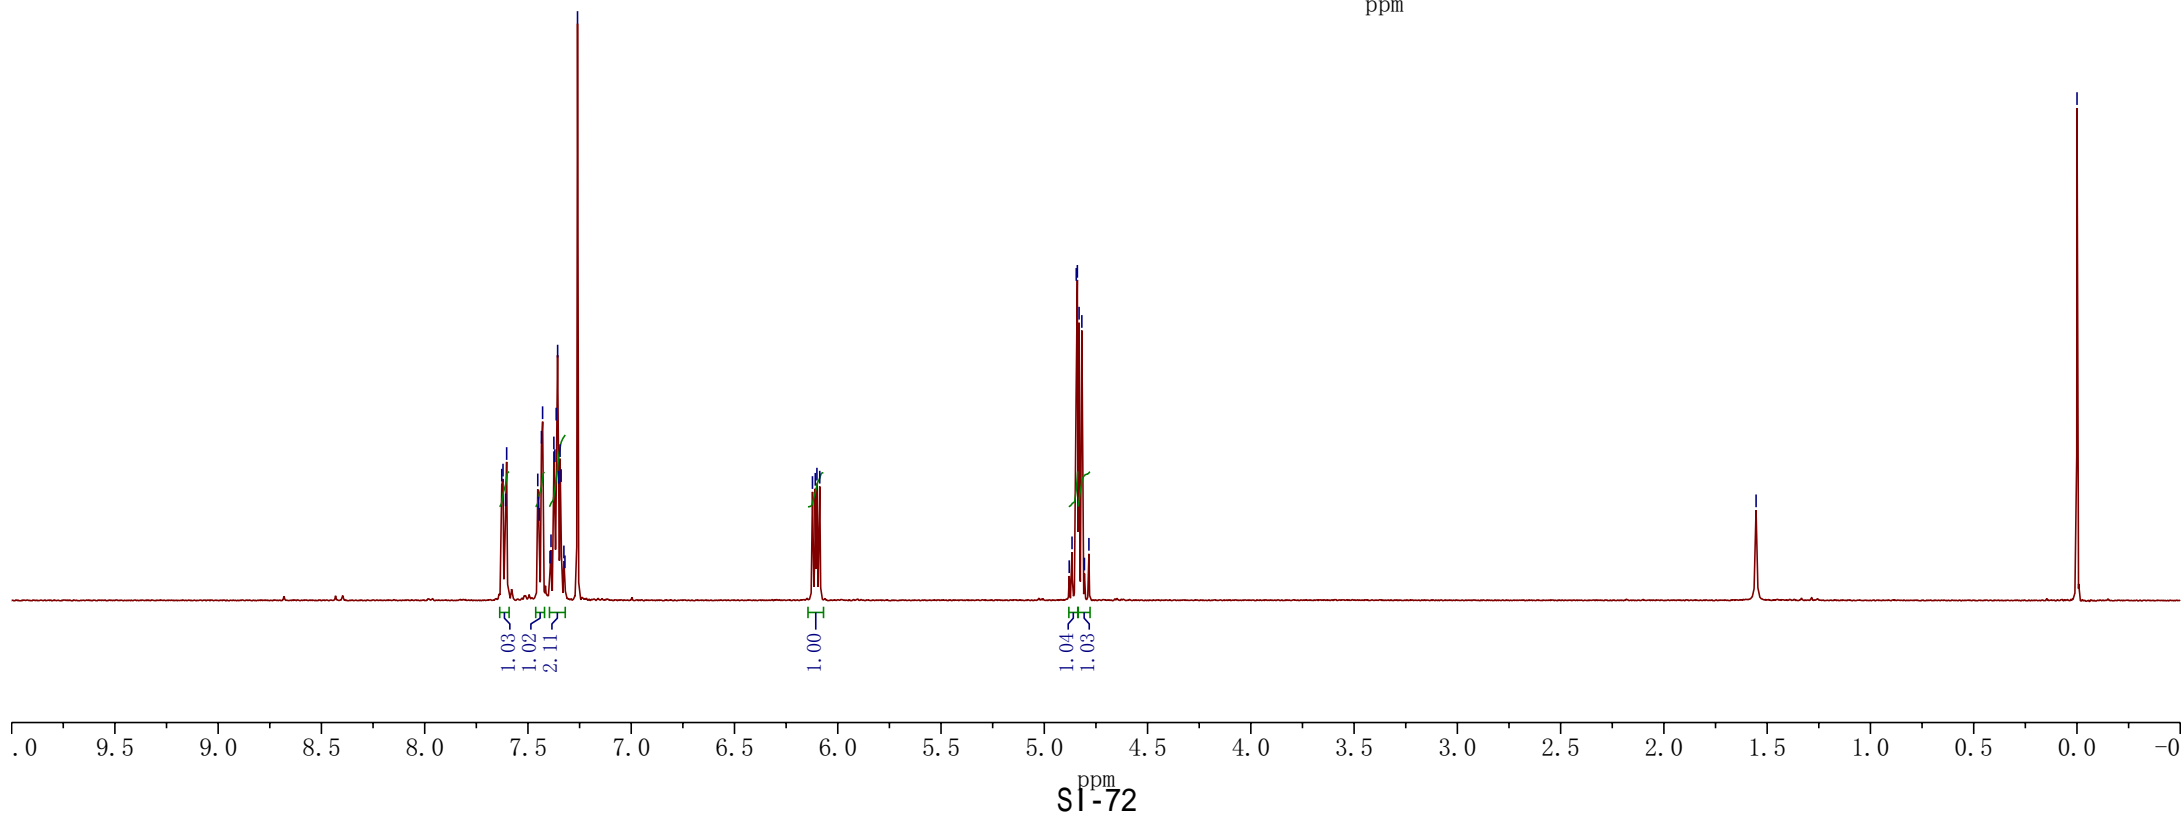



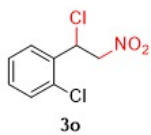

133.25  
132.90  
130.92  
130.35  
128.89  
127.96

79.70  
77.48  
77.16  
76.84

53.68

30 170 160 150 140 130 120 110 100 90 80 70 60 50 40 30 20 10 0

ppm  
SI-73

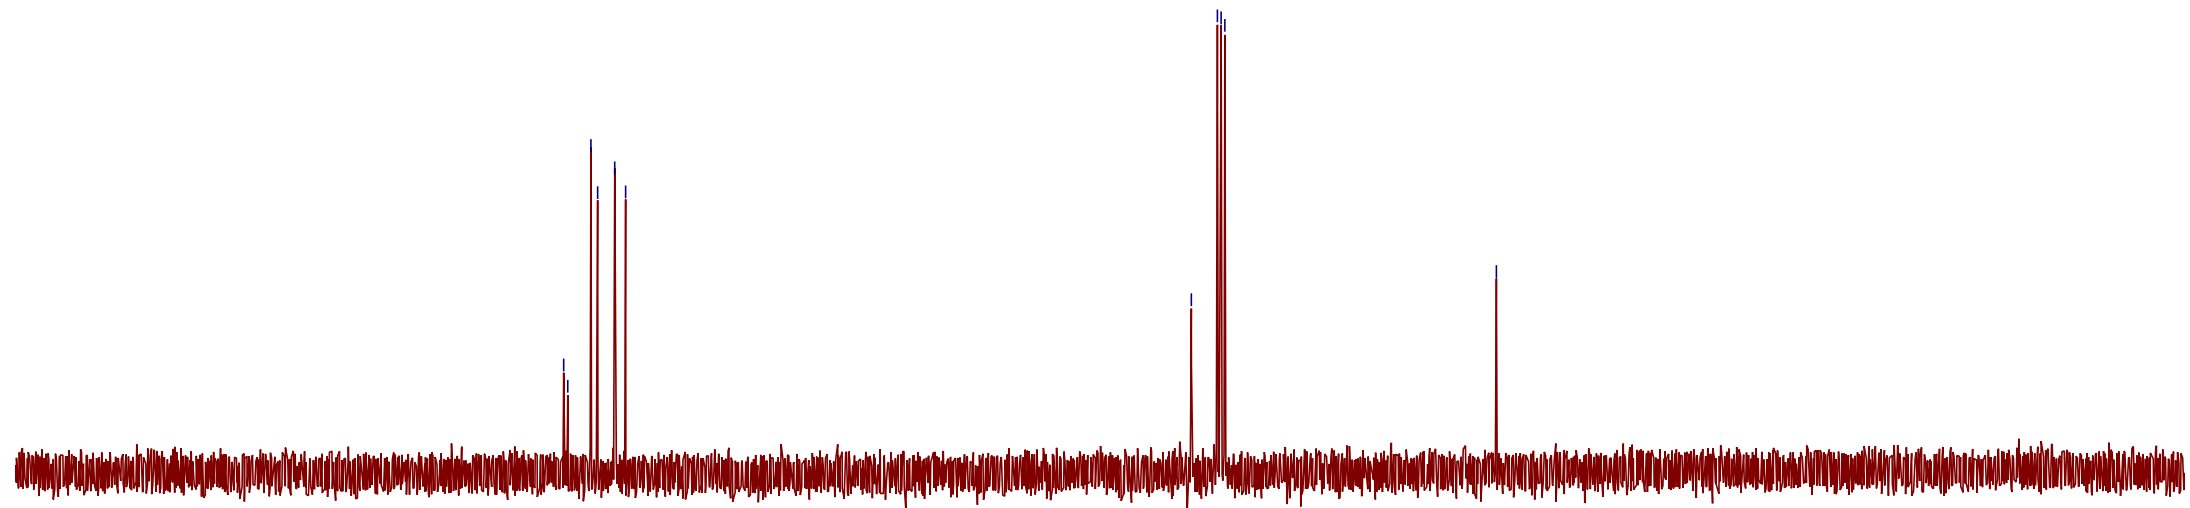

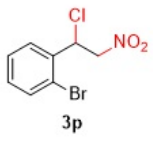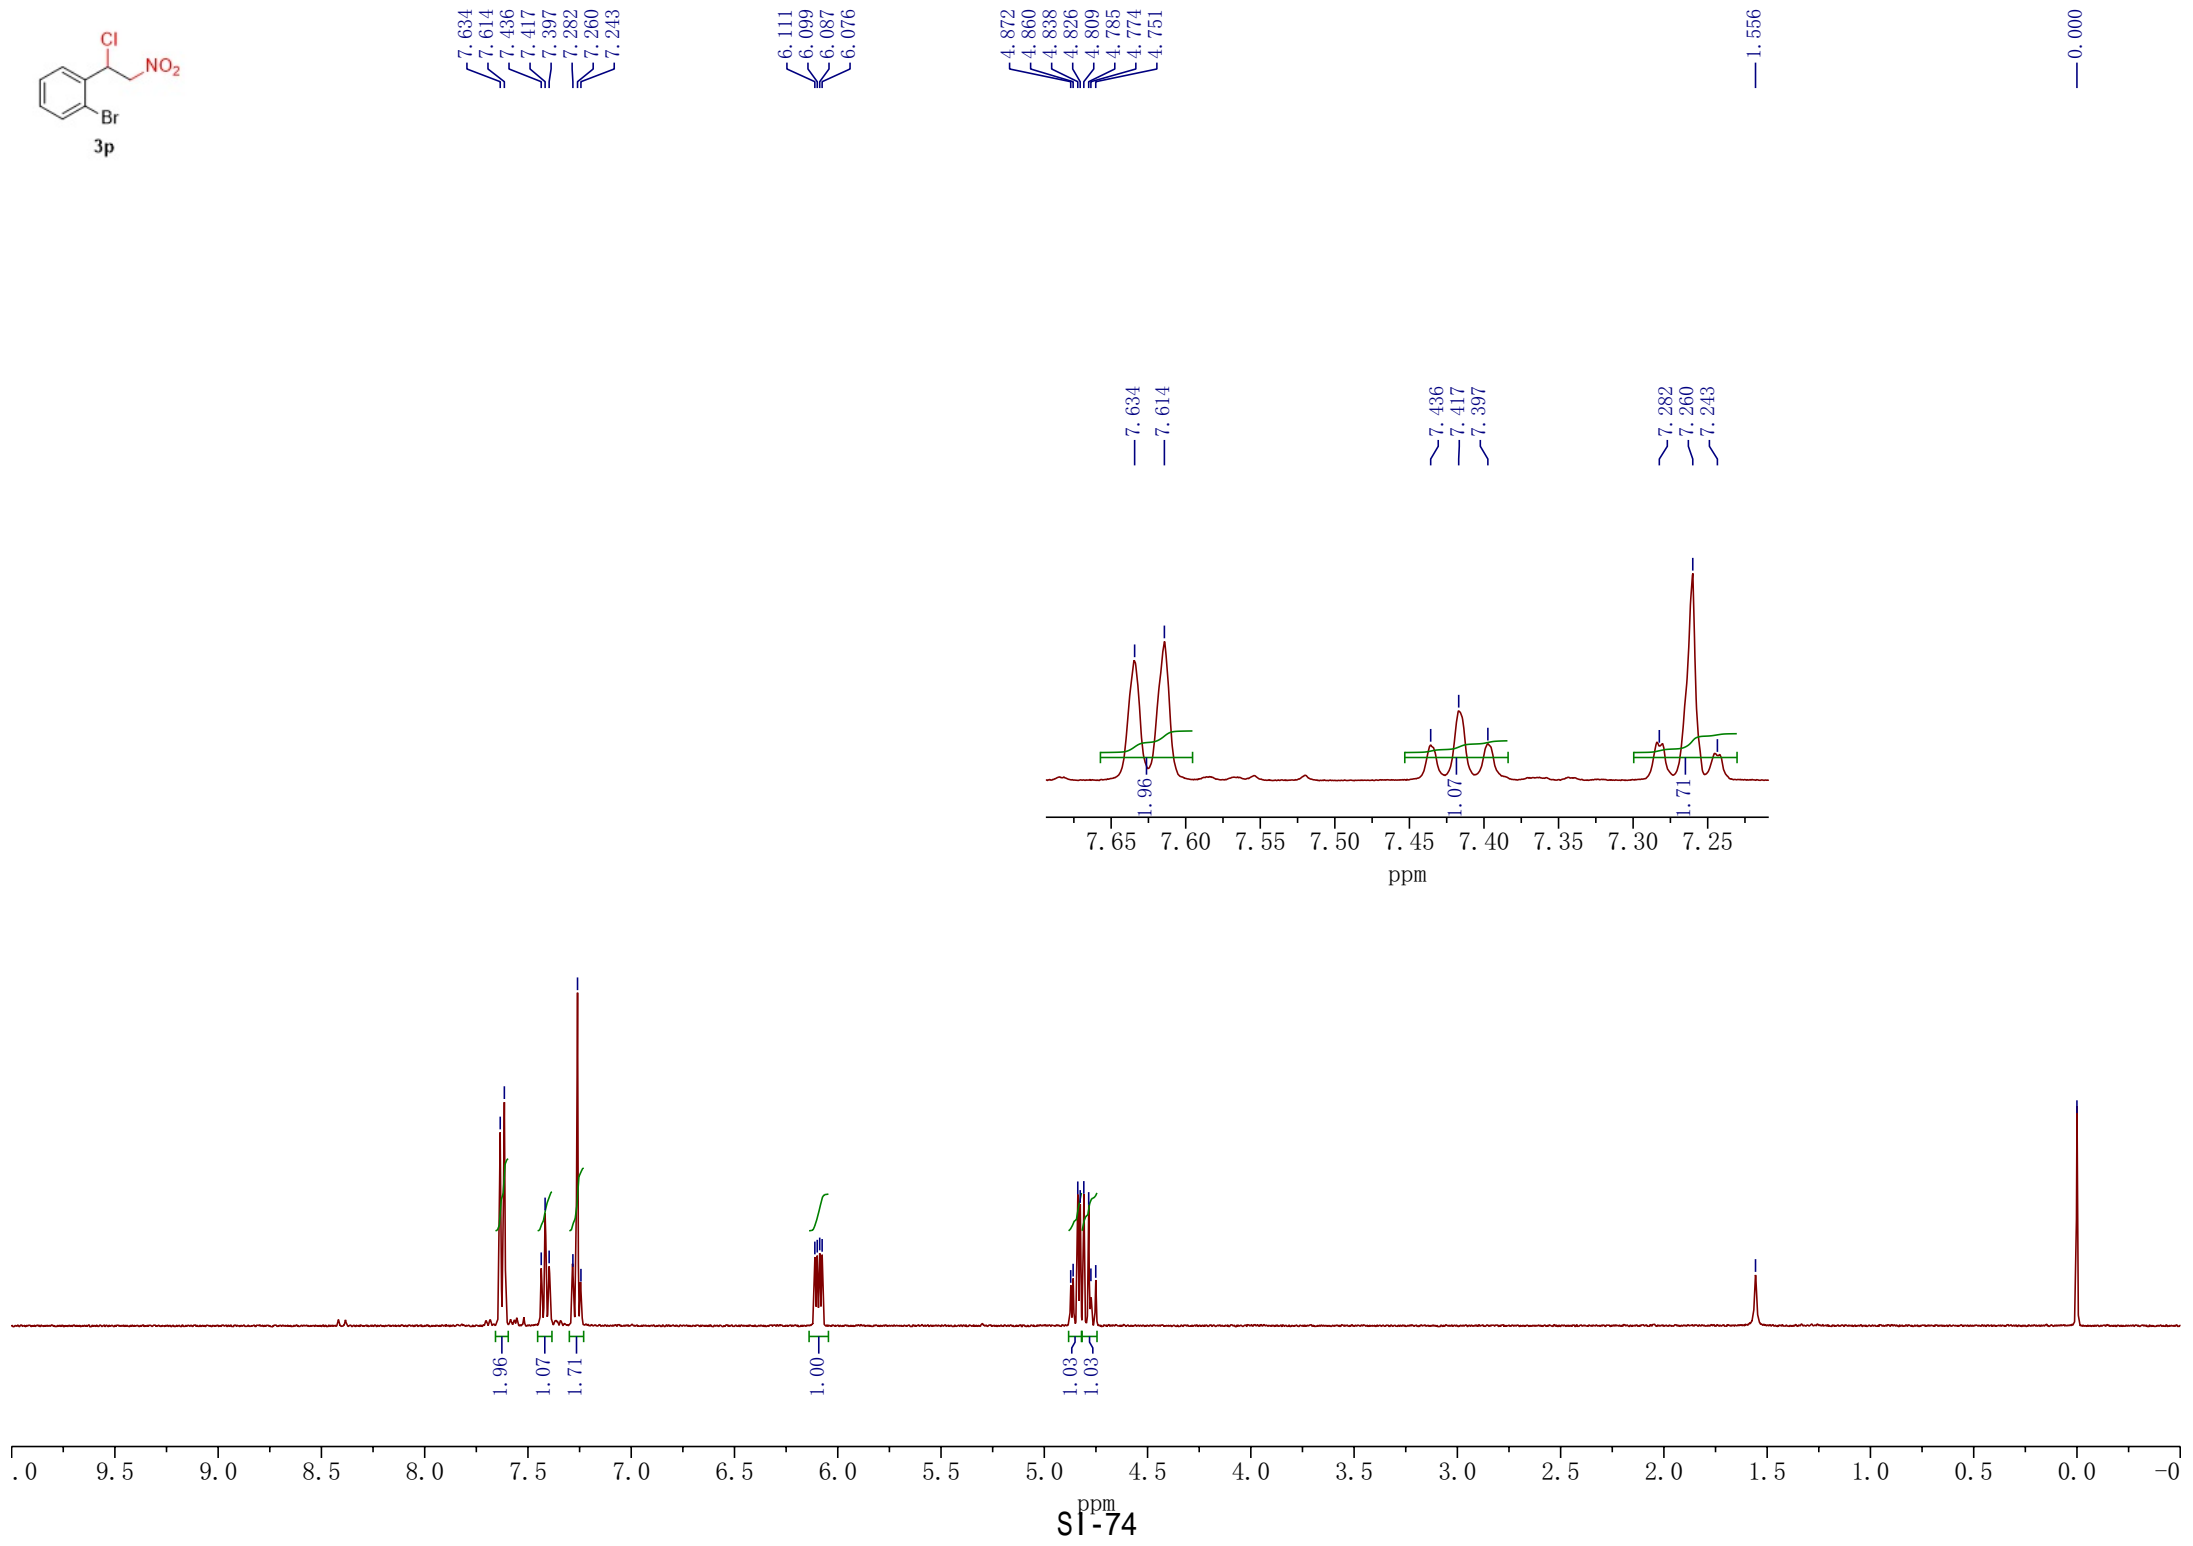



134.87  
133.64  
131.15  
129.06  
128.59  
123.01

79.83  
77.48  
77.16  
76.84

56.19

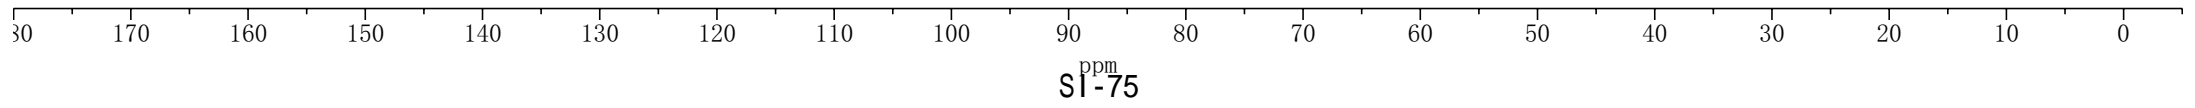

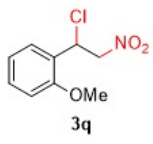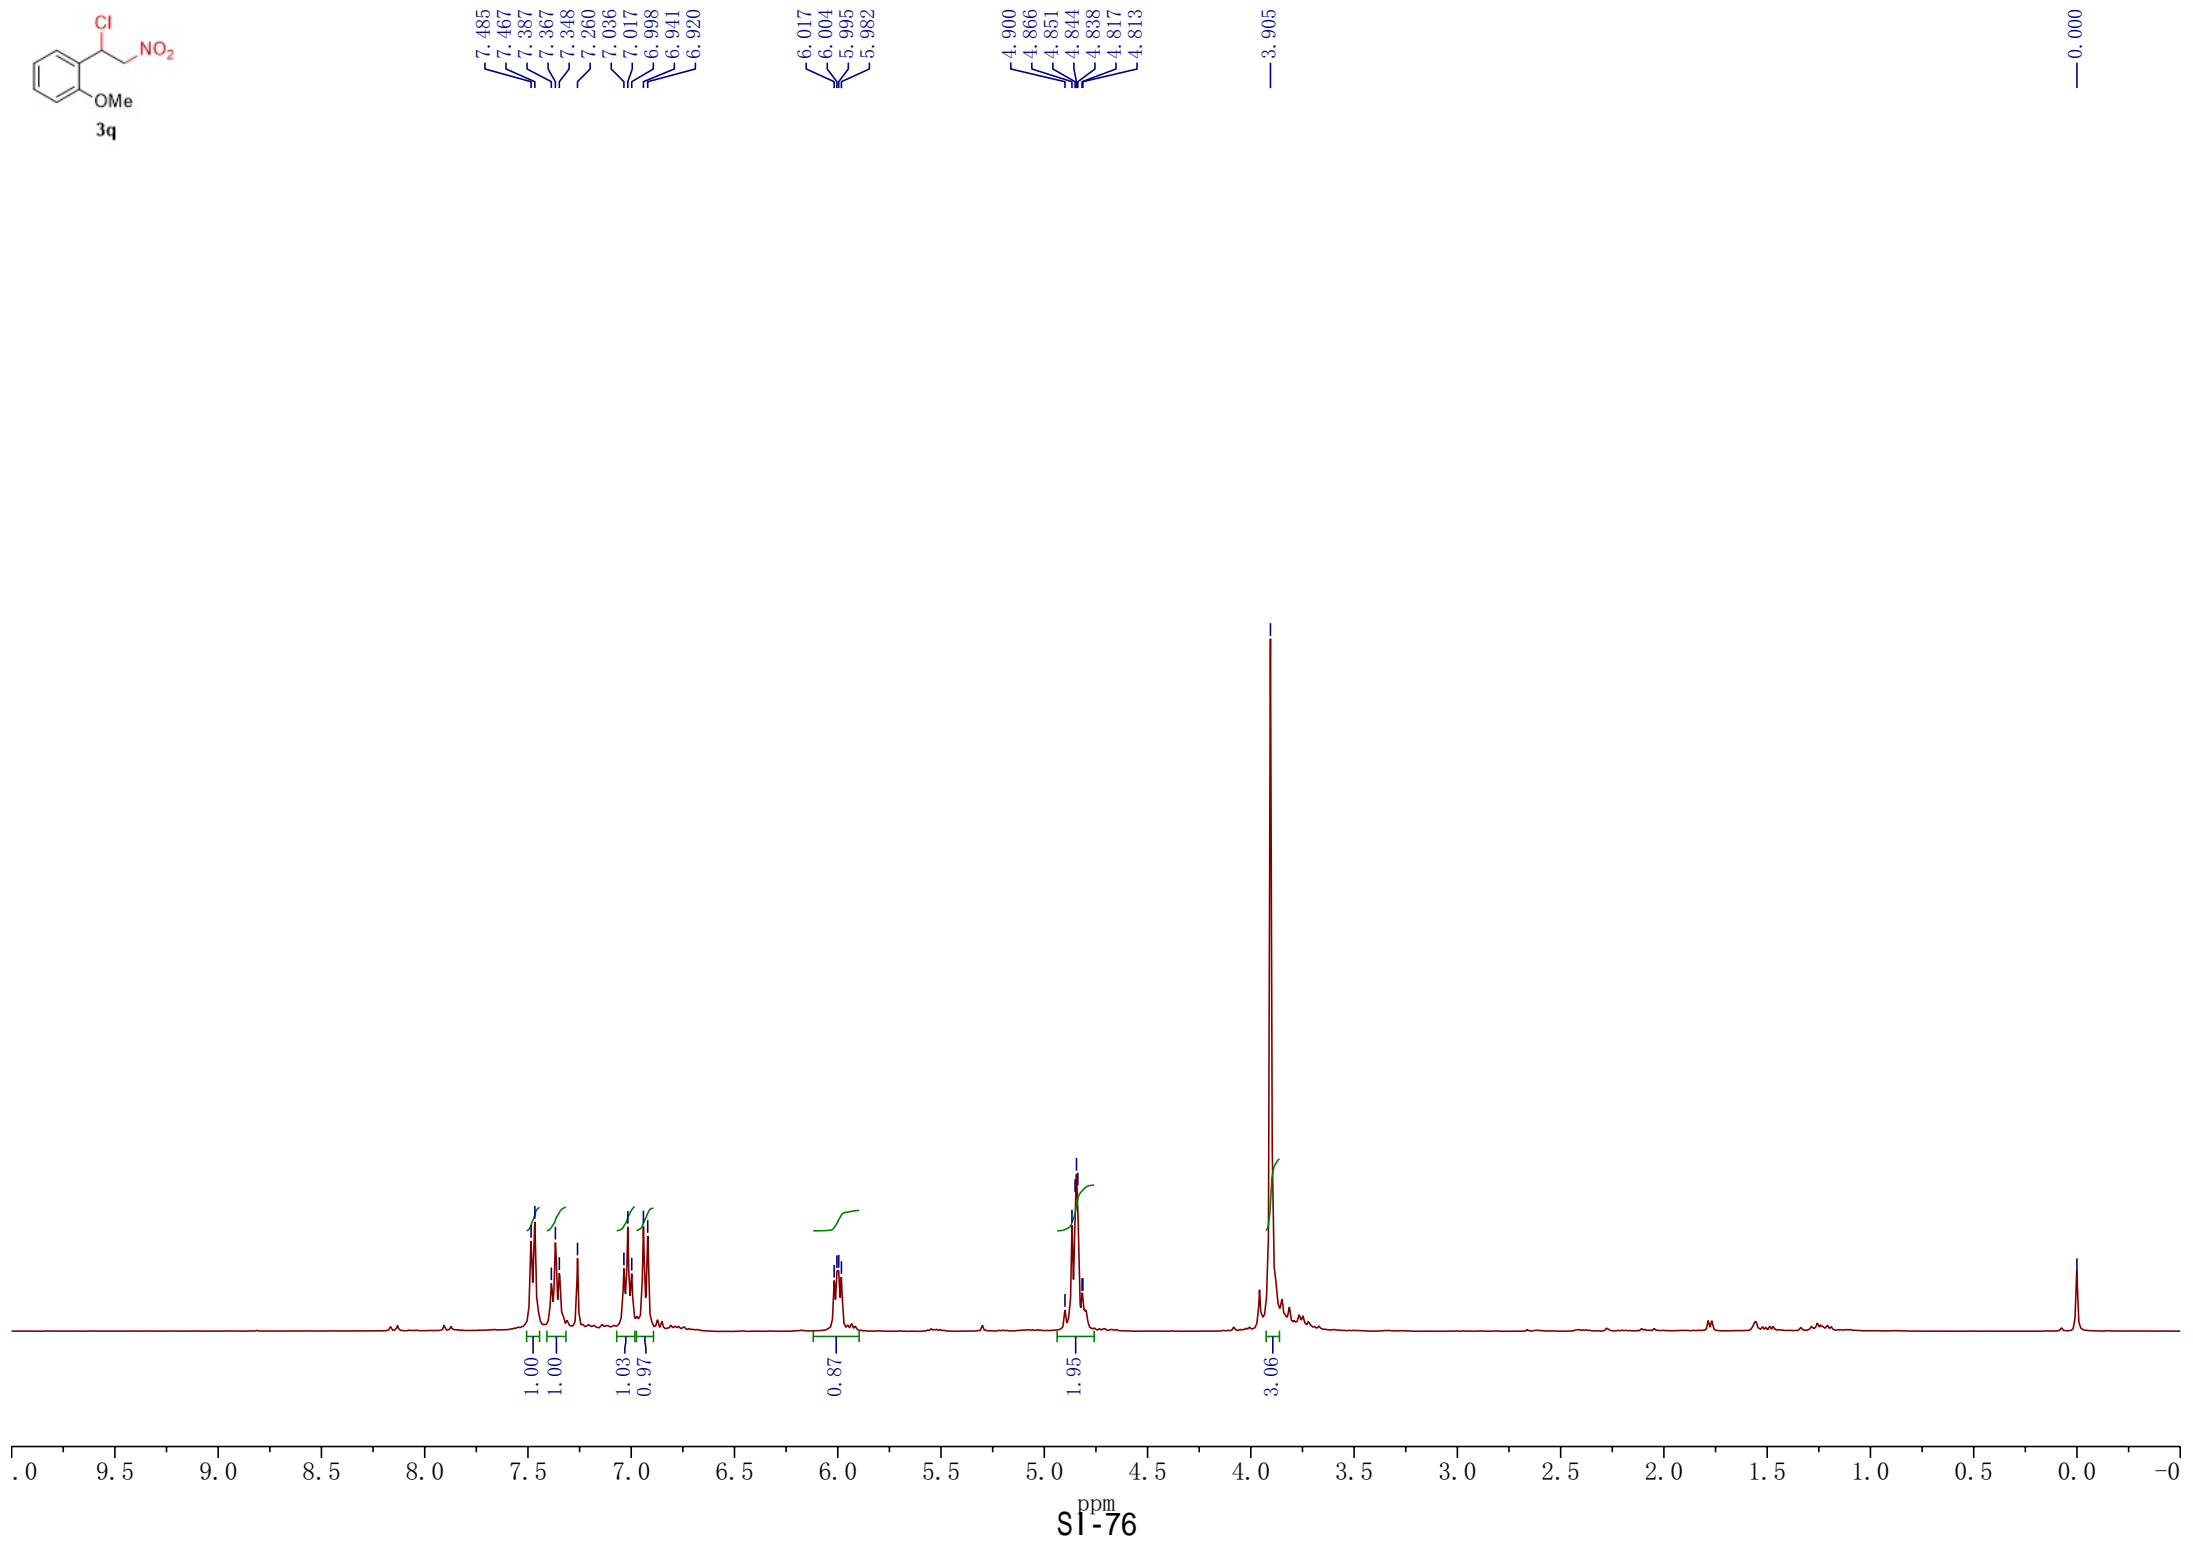

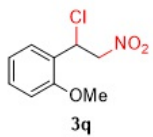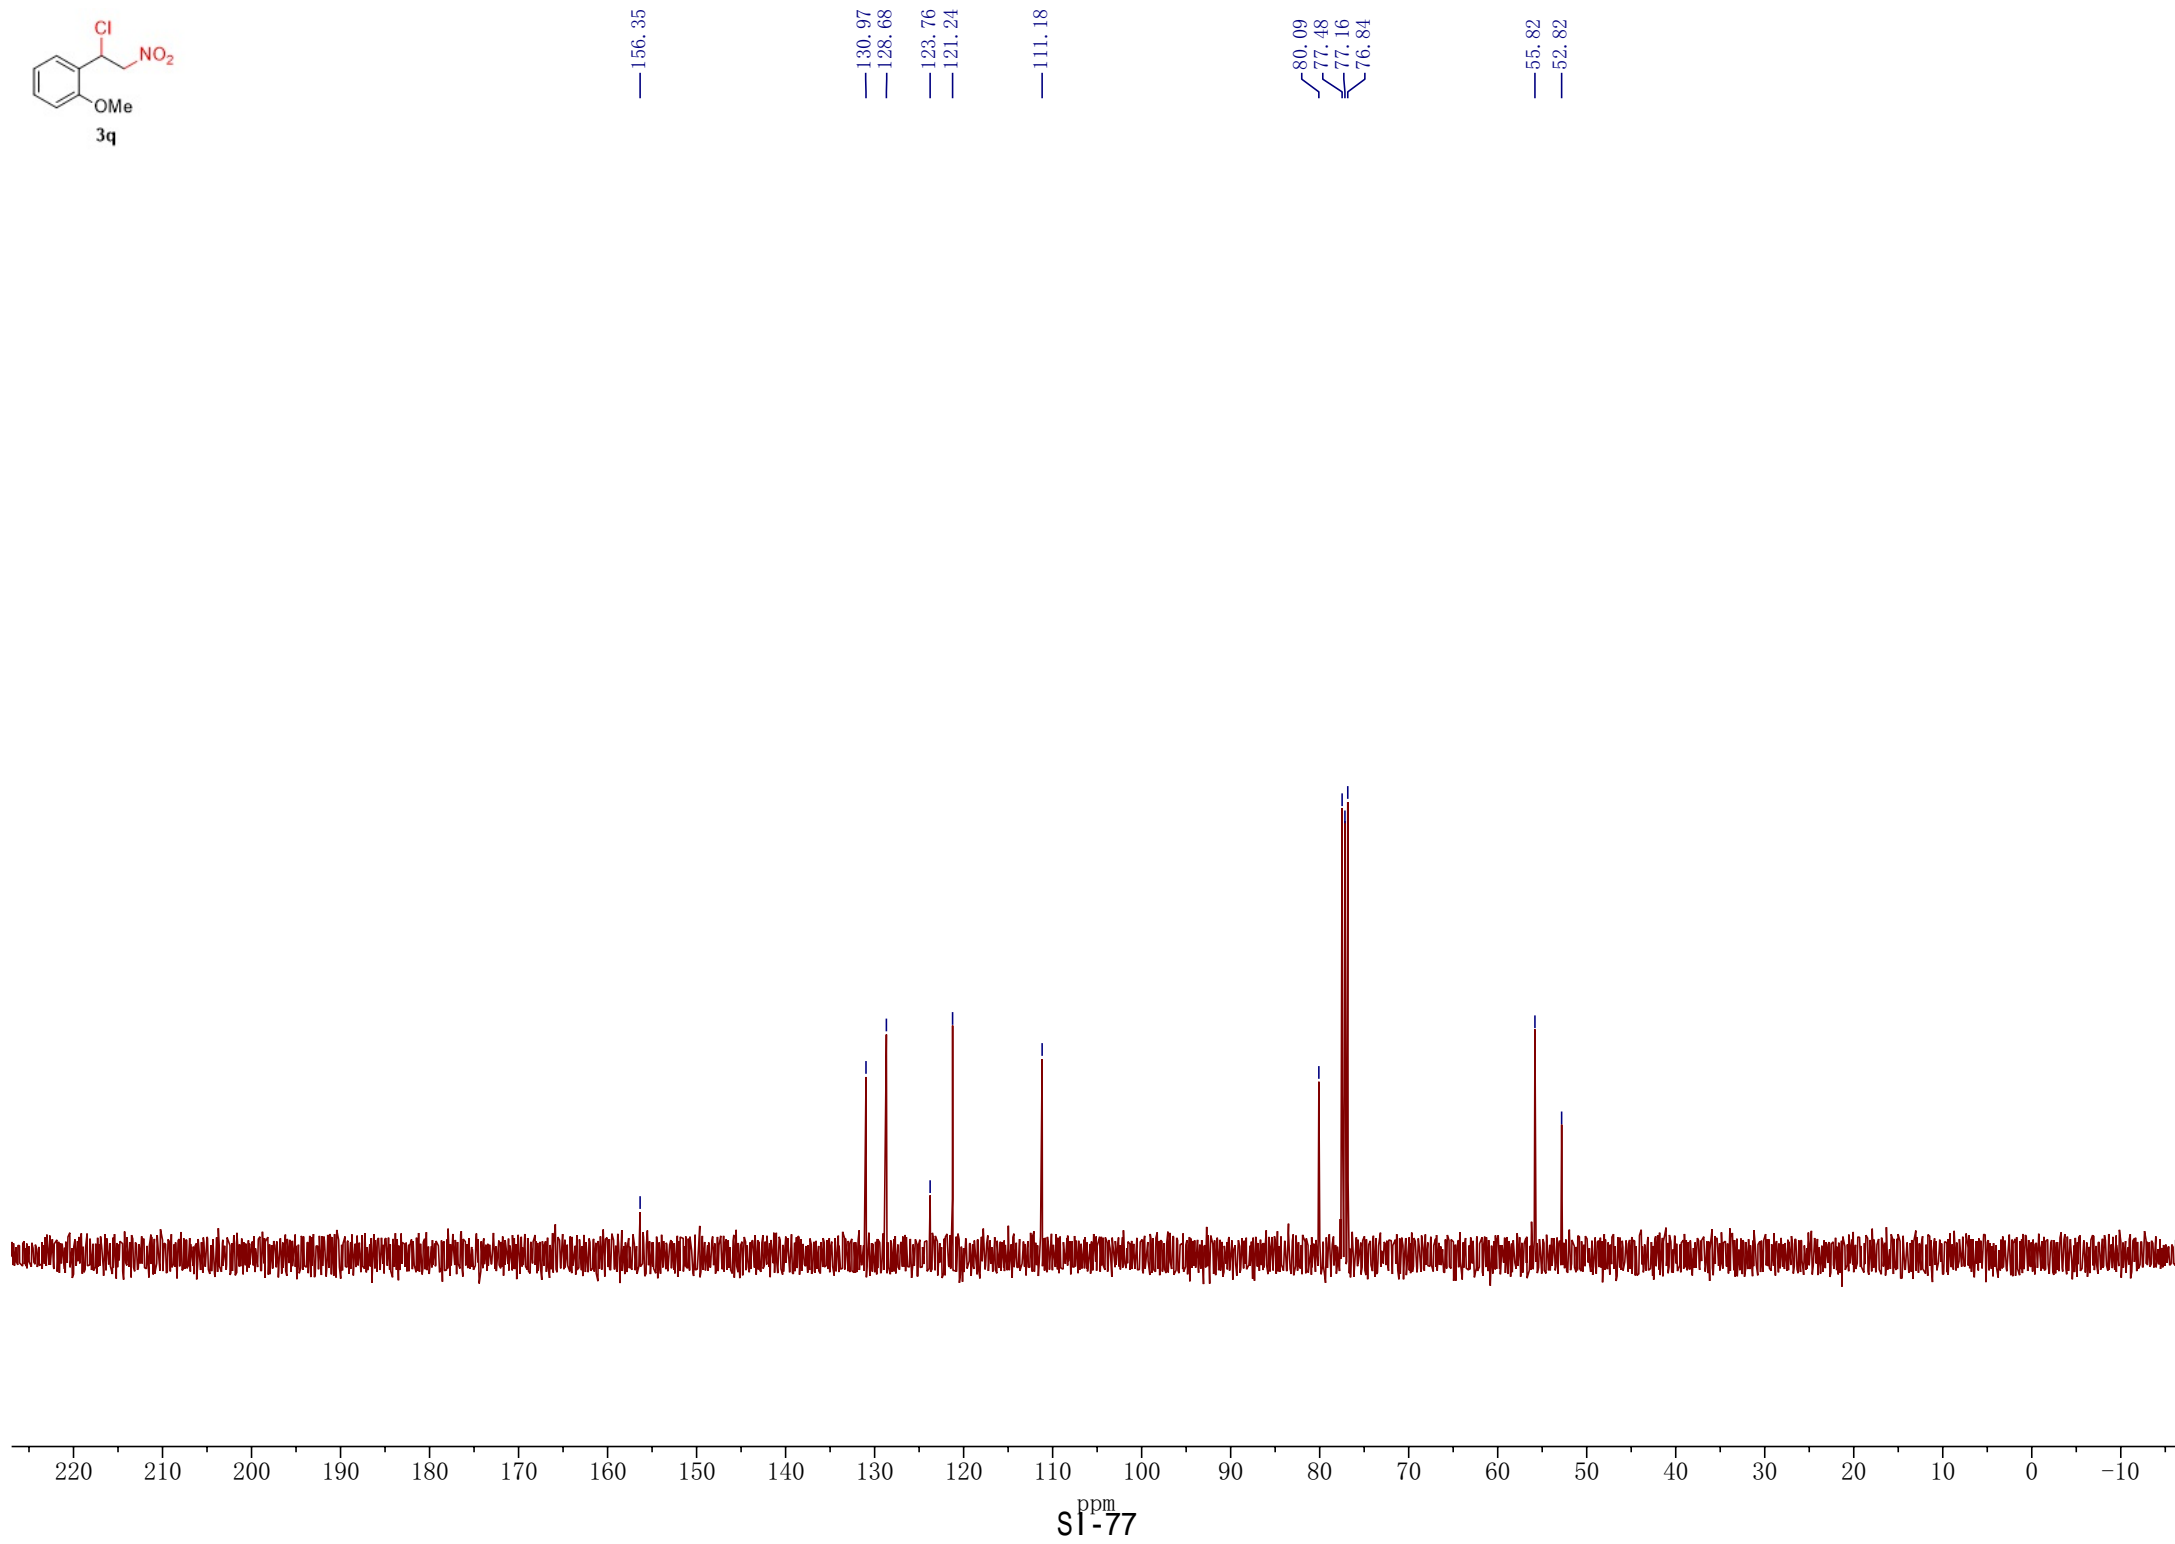

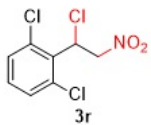

7.432  
7.421  
7.399  
7.376  
7.300  
7.280  
7.279  
7.271  
7.260  
6.577  
6.563  
6.555  
6.542

5.474  
5.452  
5.438  
5.416  
5.101  
5.088  
5.066  
5.053

-0.000

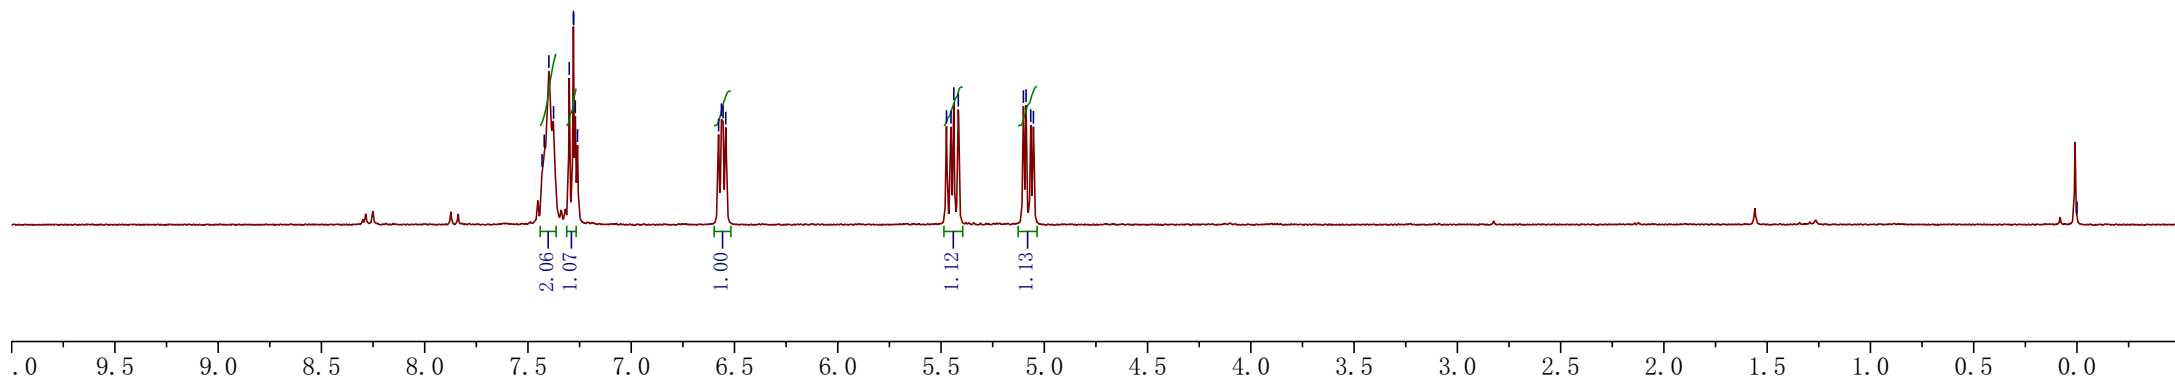

SI-78

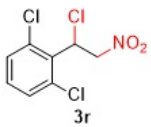

135.91

131.25

130.82

129.18

77.81

77.48

77.16

76.84

51.56

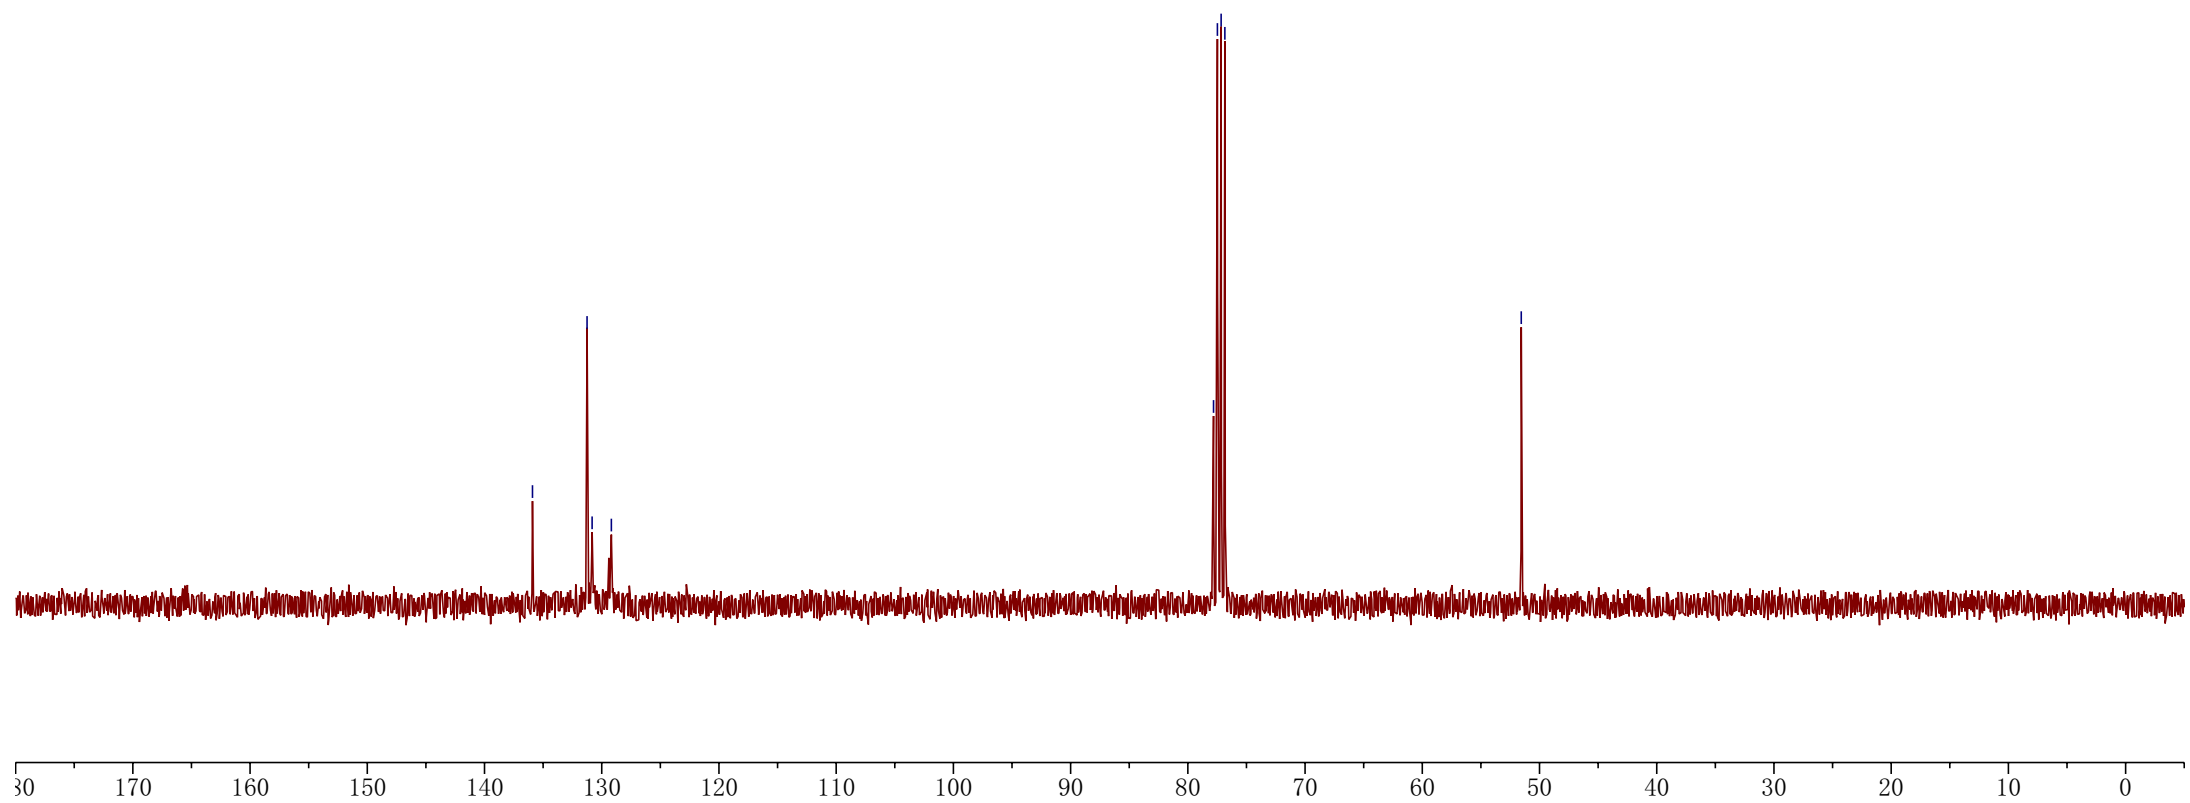

ppm  
SI-79

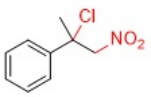

3s

7.581  
7.577  
7.564  
7.560  
7.557  
7.451  
7.436  
7.432  
7.427  
7.415  
7.410  
7.400  
7.396  
7.386  
7.382  
7.378  
7.371  
7.364  
7.356  
7.260

4.960  
4.930  
4.923  
4.893

2.231

1.563

0.000

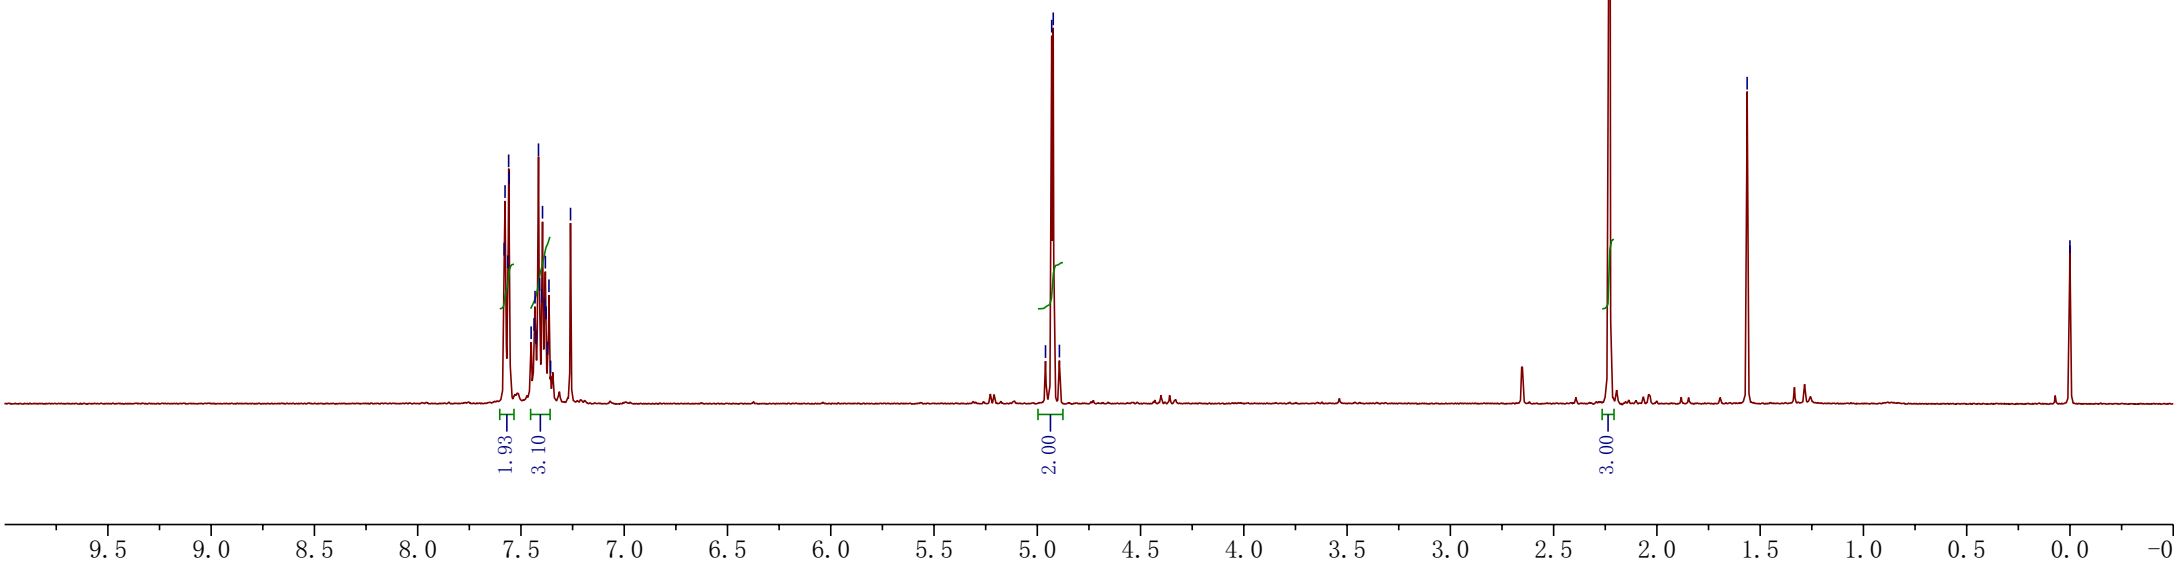

SI-80



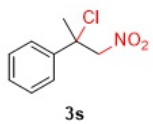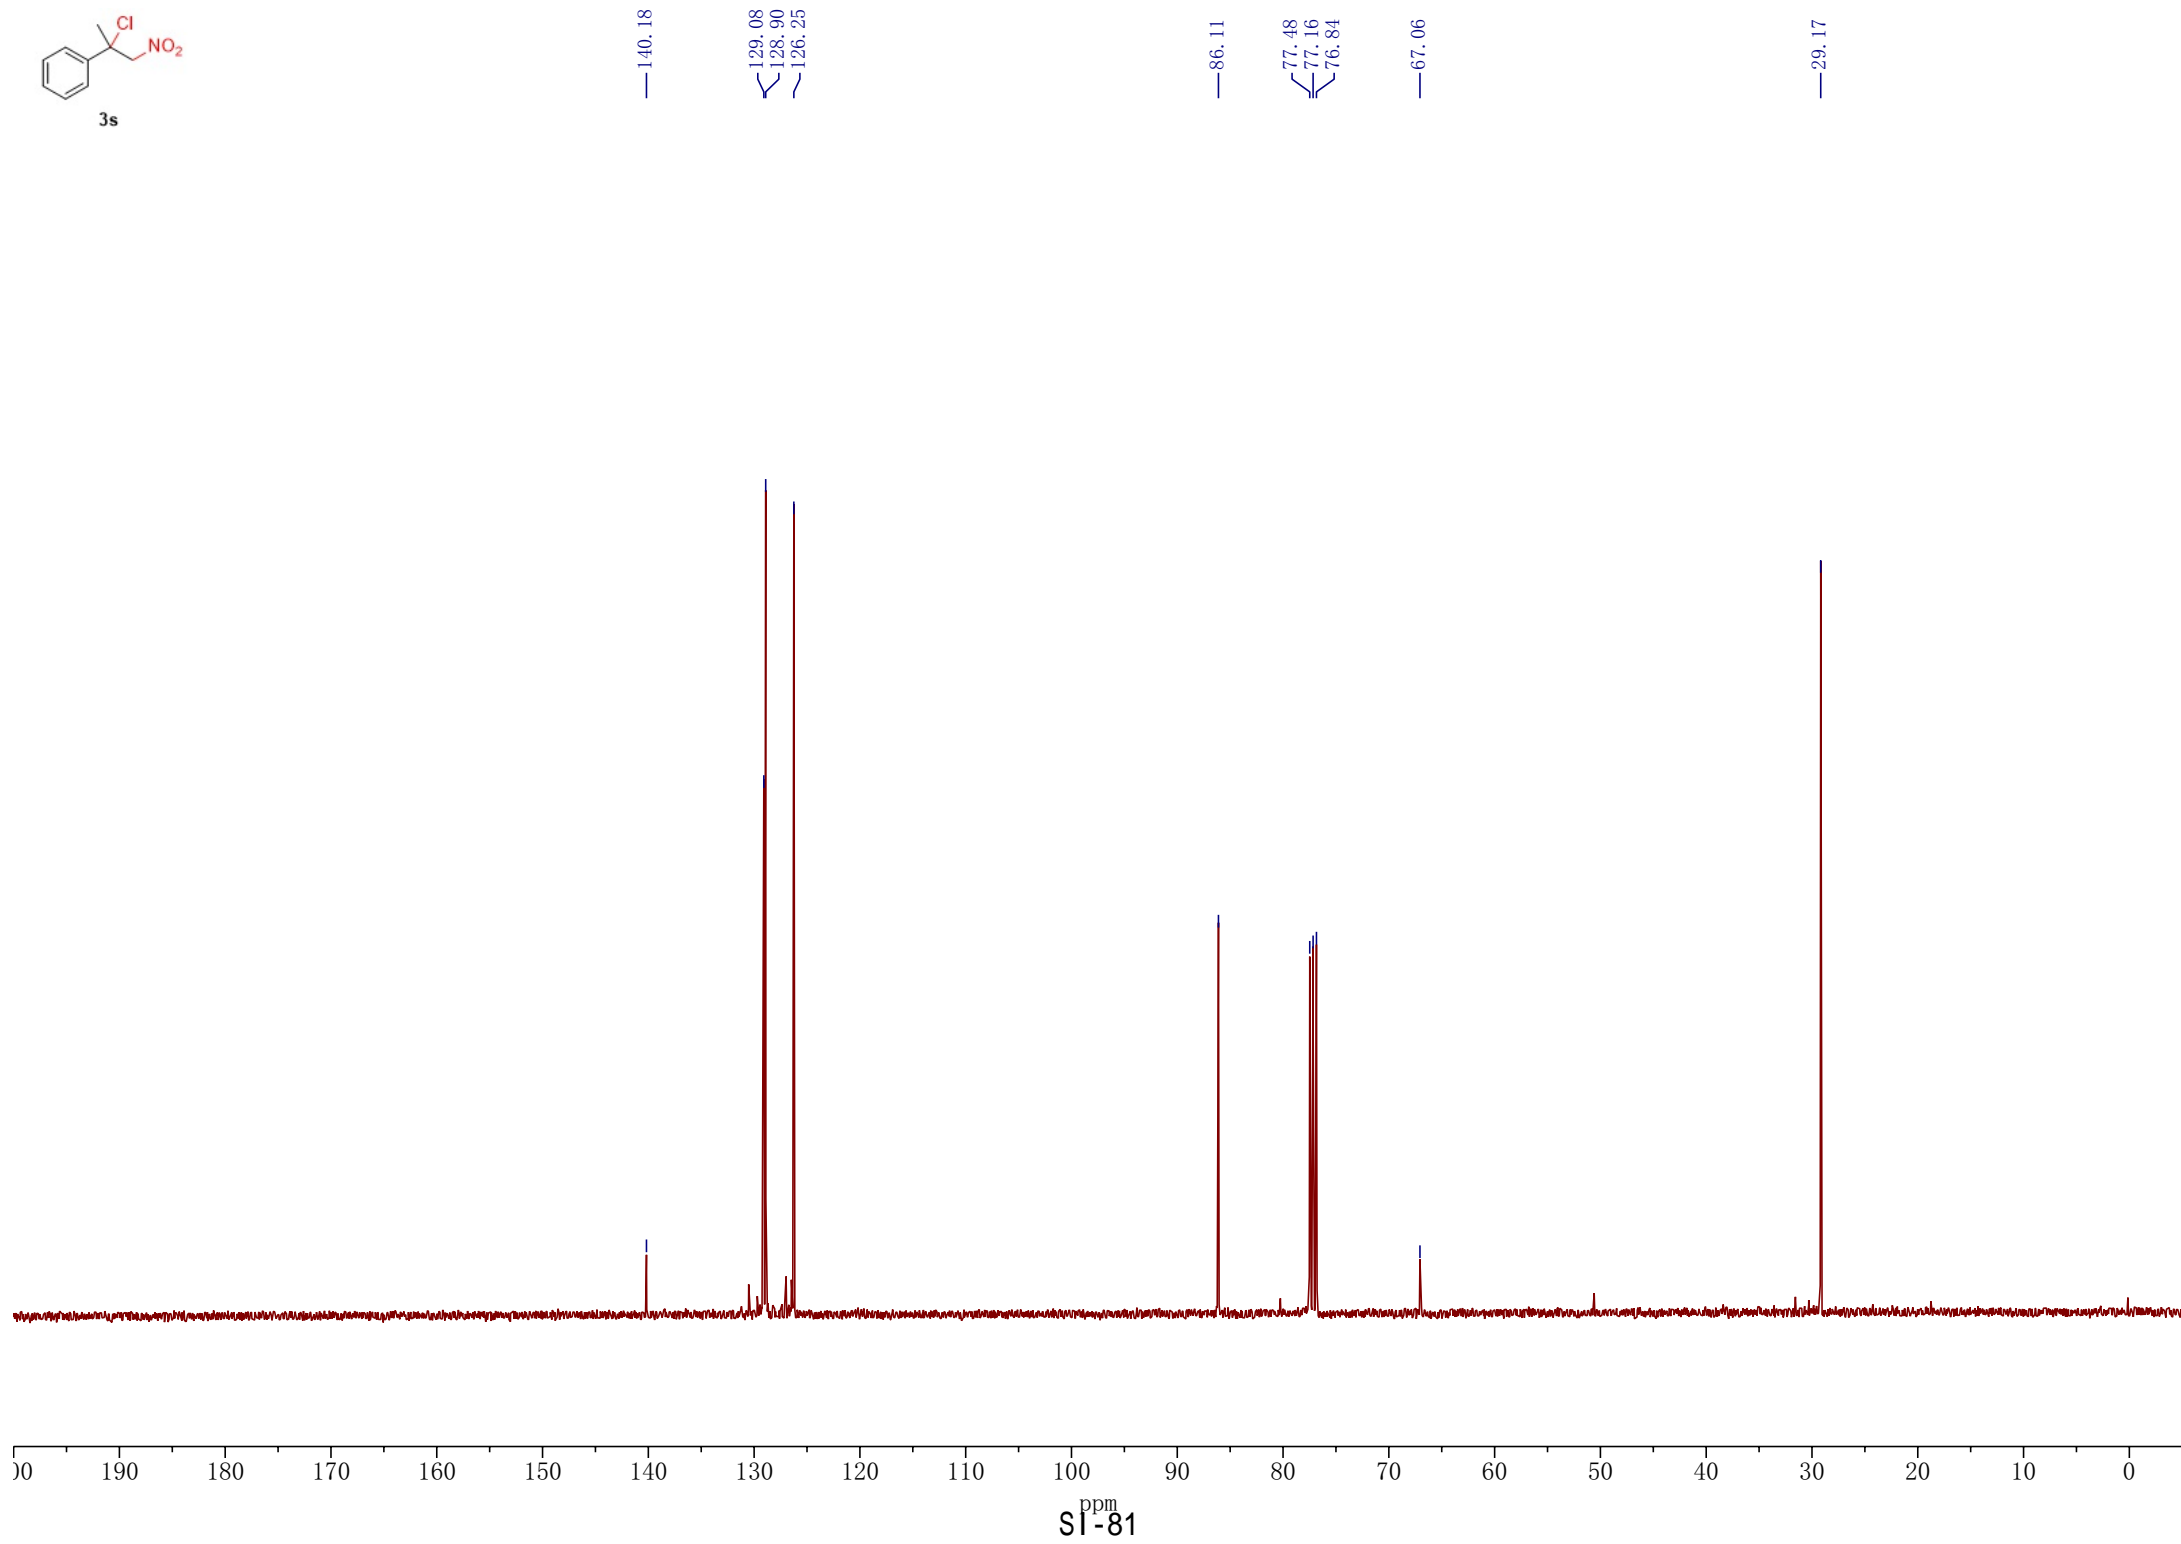

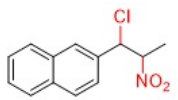

3t (dr=1 : 0.52) major

7.919  
7.897  
7.880  
7.859  
7.854  
7.848  
7.838  
7.832  
7.823  
7.566  
7.557  
7.550  
7.542  
7.533  
7.526  
7.518  
7.509  
7.505  
7.500  
7.479  
7.474  
7.457  
7.453  
7.252

5.557  
5.537  
5.408  
5.383  
5.175  
5.158  
5.142  
5.133  
5.116  
5.099  
5.085  
5.068  
5.050  
5.033  
5.016

1.809  
1.792  
1.548  
1.373  
1.356

0.073  
0.000

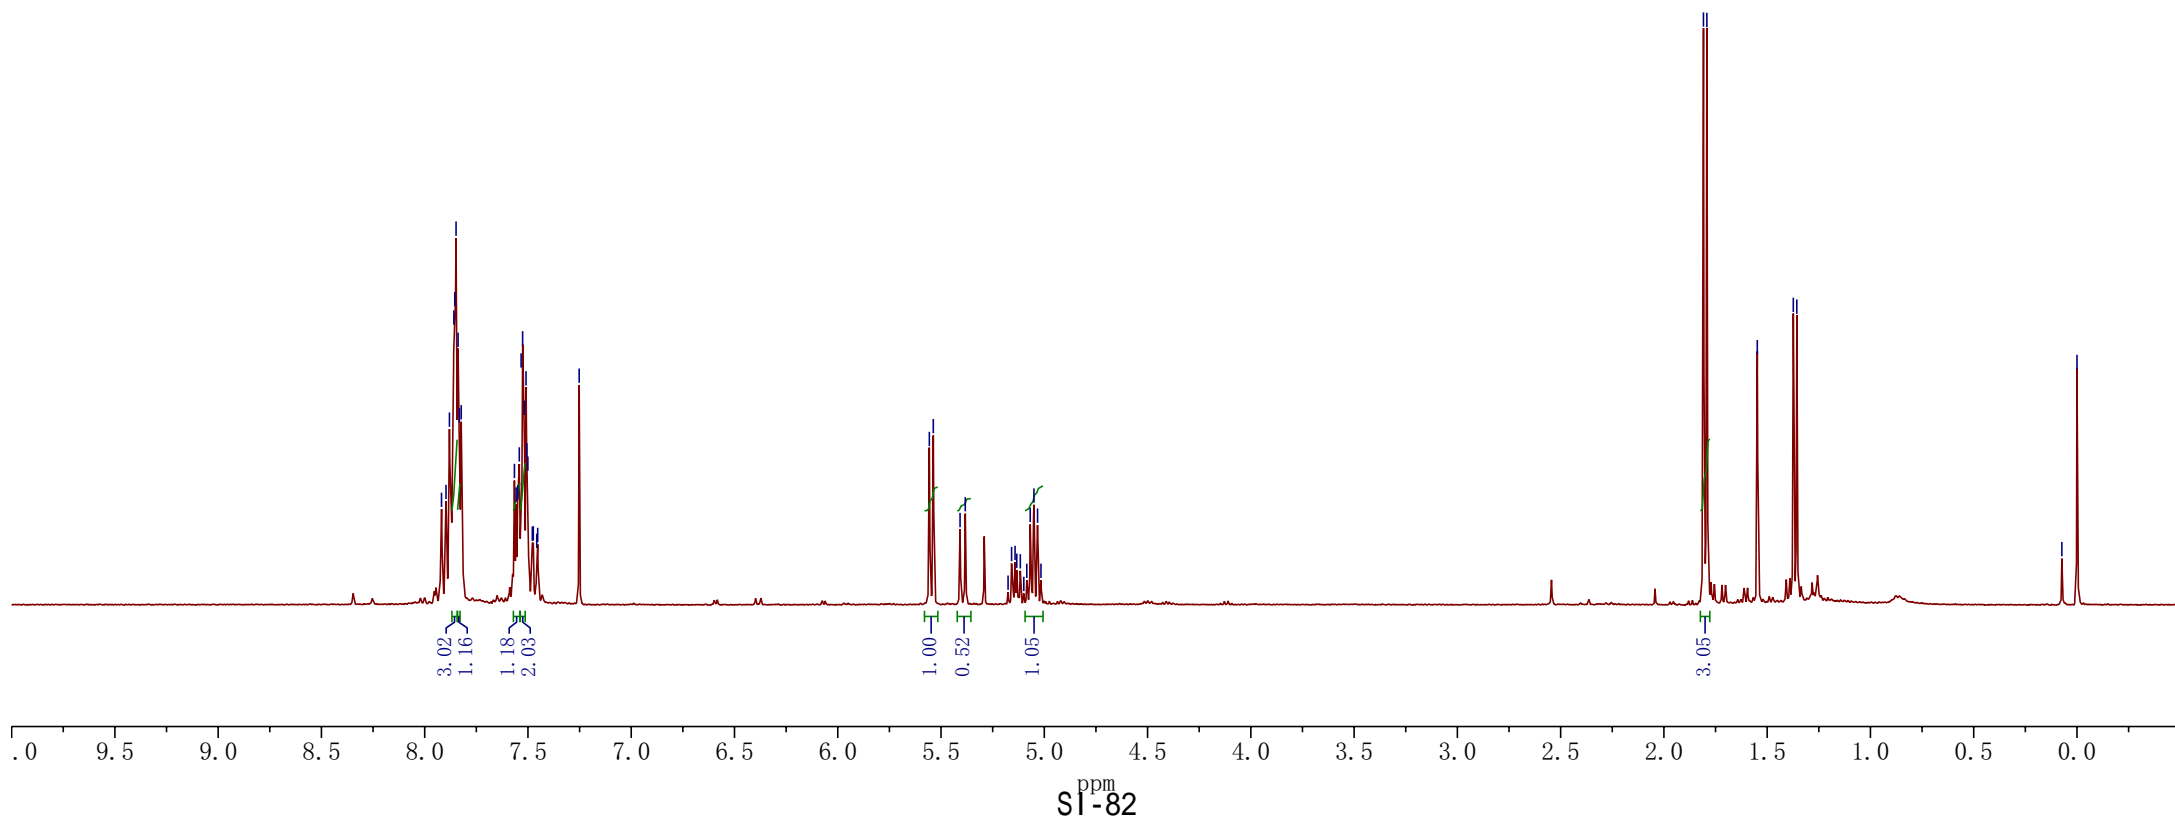

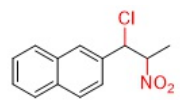

3t (dr=1 : 0.52) major

133.77  
133.64  
133.56  
129.21  
128.35  
127.87  
127.50  
127.23  
126.97  
124.20

87.60

77.48  
77.16  
76.84

63.12

16.01

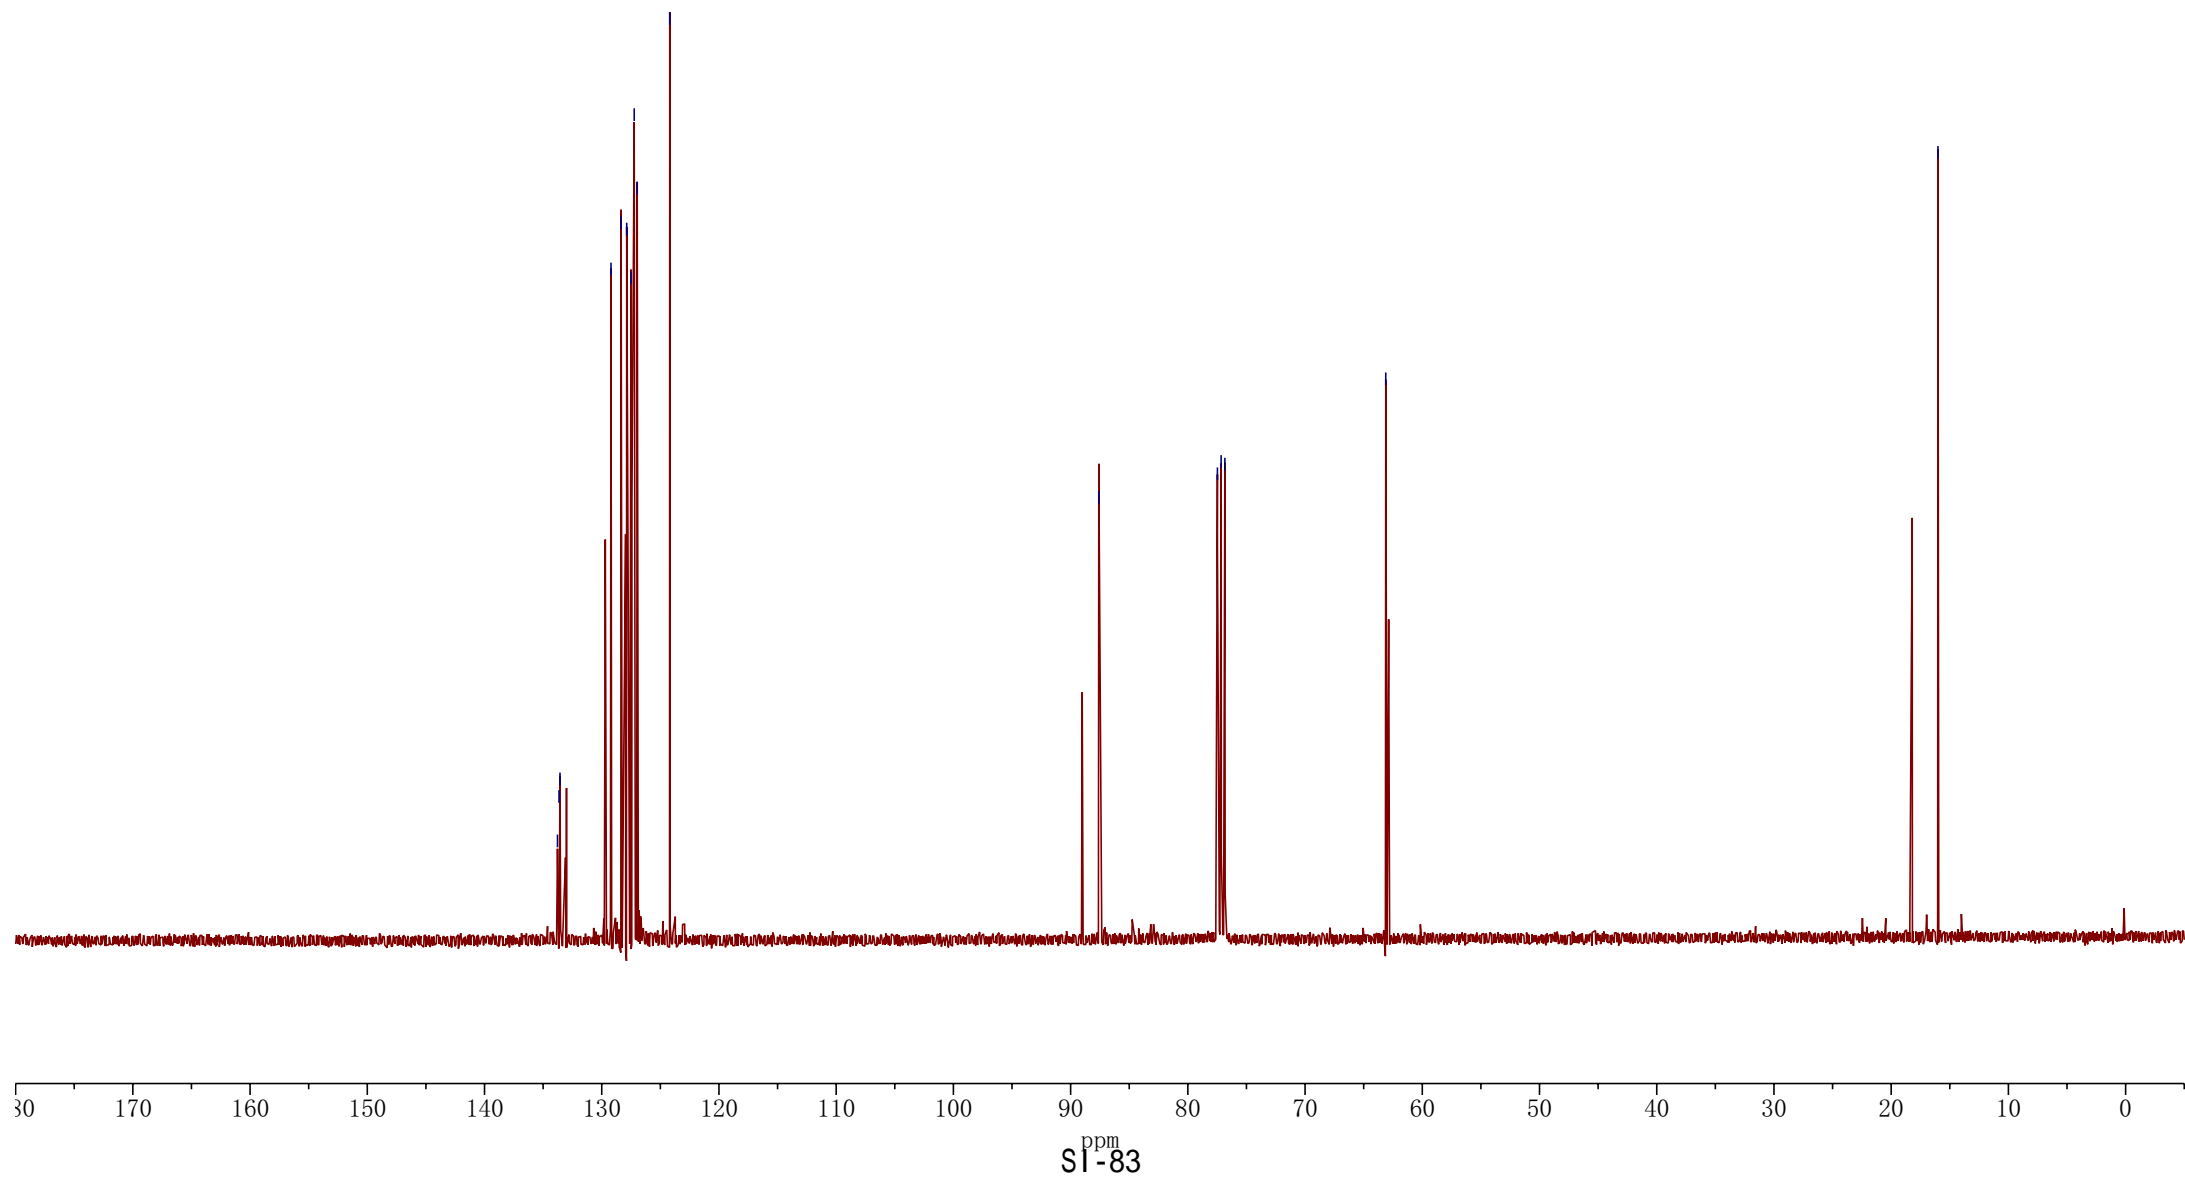

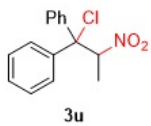

7.462  
7.458  
7.446  
7.442  
7.441  
7.438  
7.426  
7.423  
7.387  
7.382  
7.376  
7.366  
7.346  
7.341  
7.337  
7.332  
7.325  
7.319  
7.319  
7.314  
7.303  
7.300  
7.290  
7.286  
7.260  
5.818  
5.802  
5.785  
5.768

1.814  
1.798

1.547

0.000

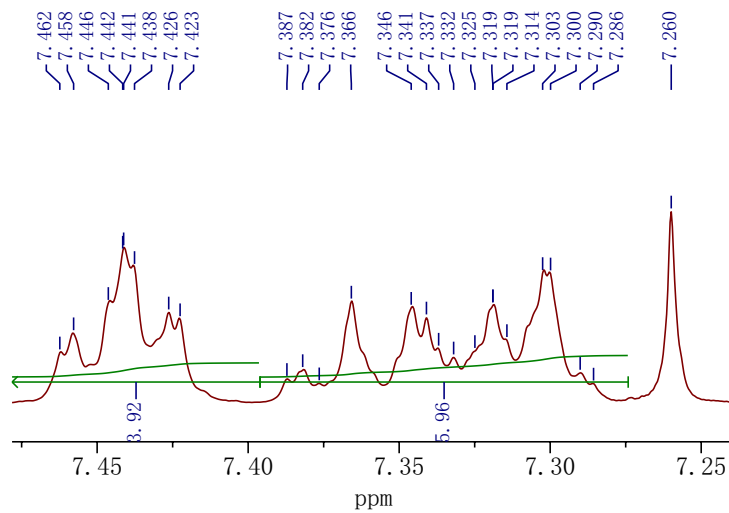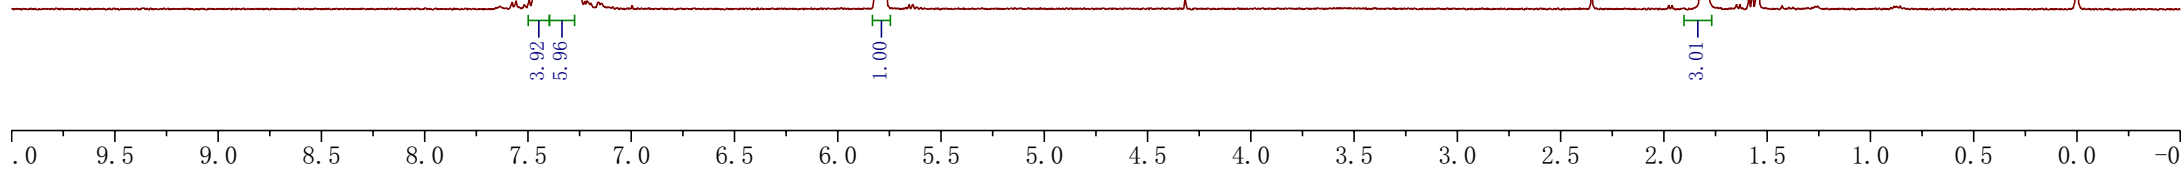

SI-84

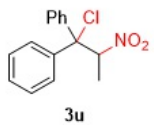

141.24  
141.21

128.57  
128.52  
128.39  
127.96  
127.61

89.41

77.48  
77.27  
77.16  
76.84

17.35

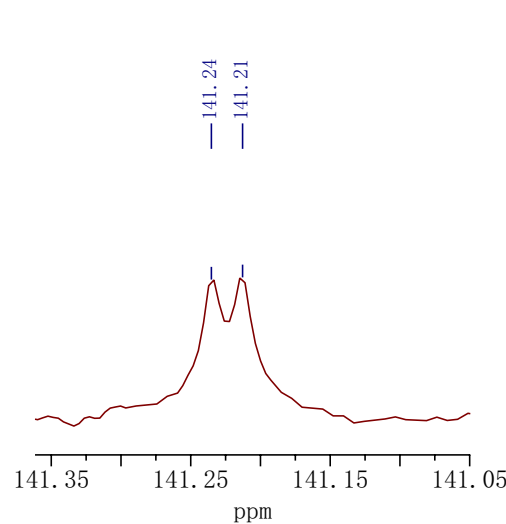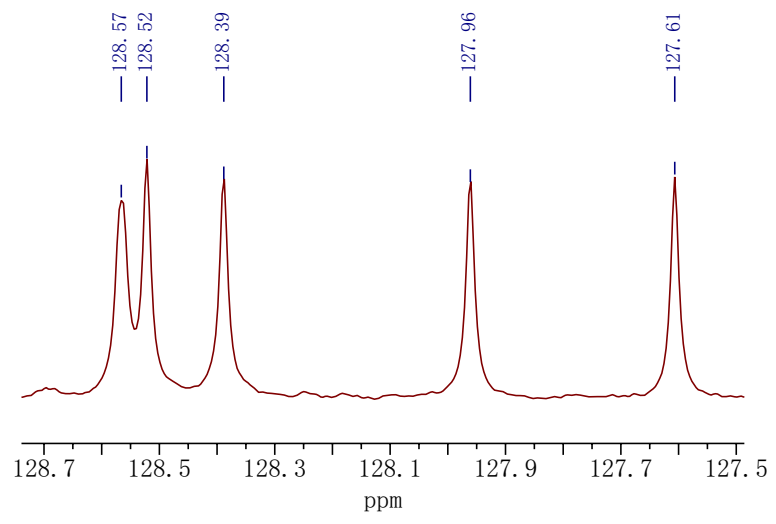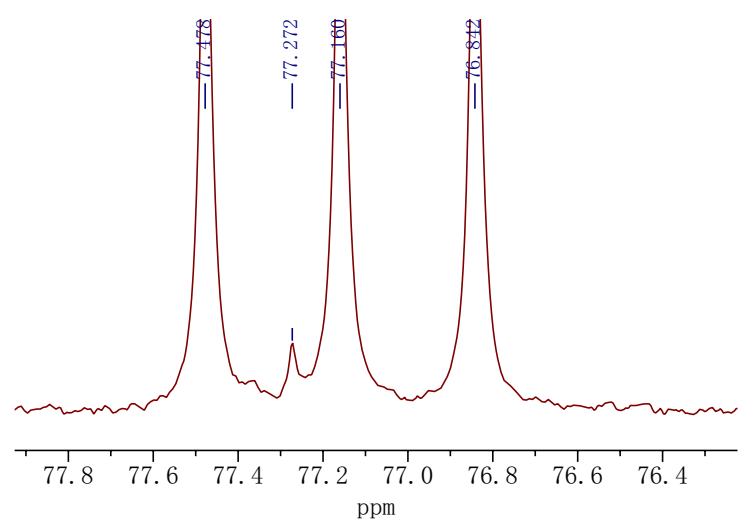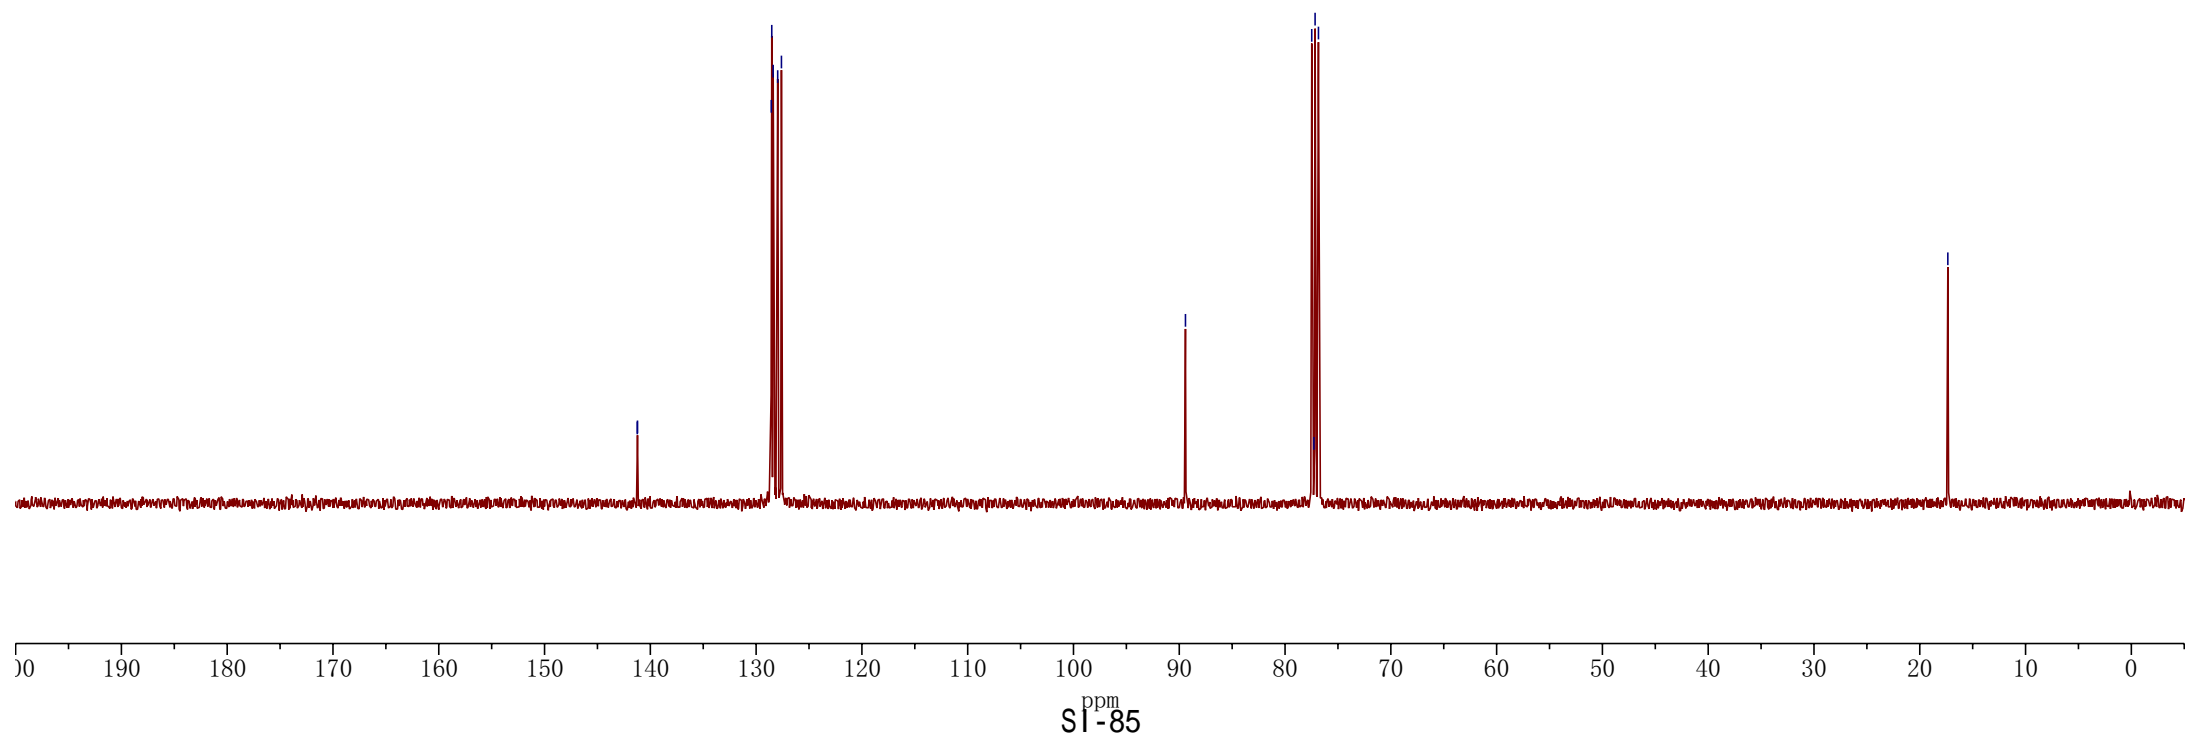

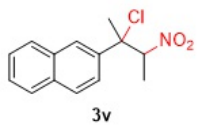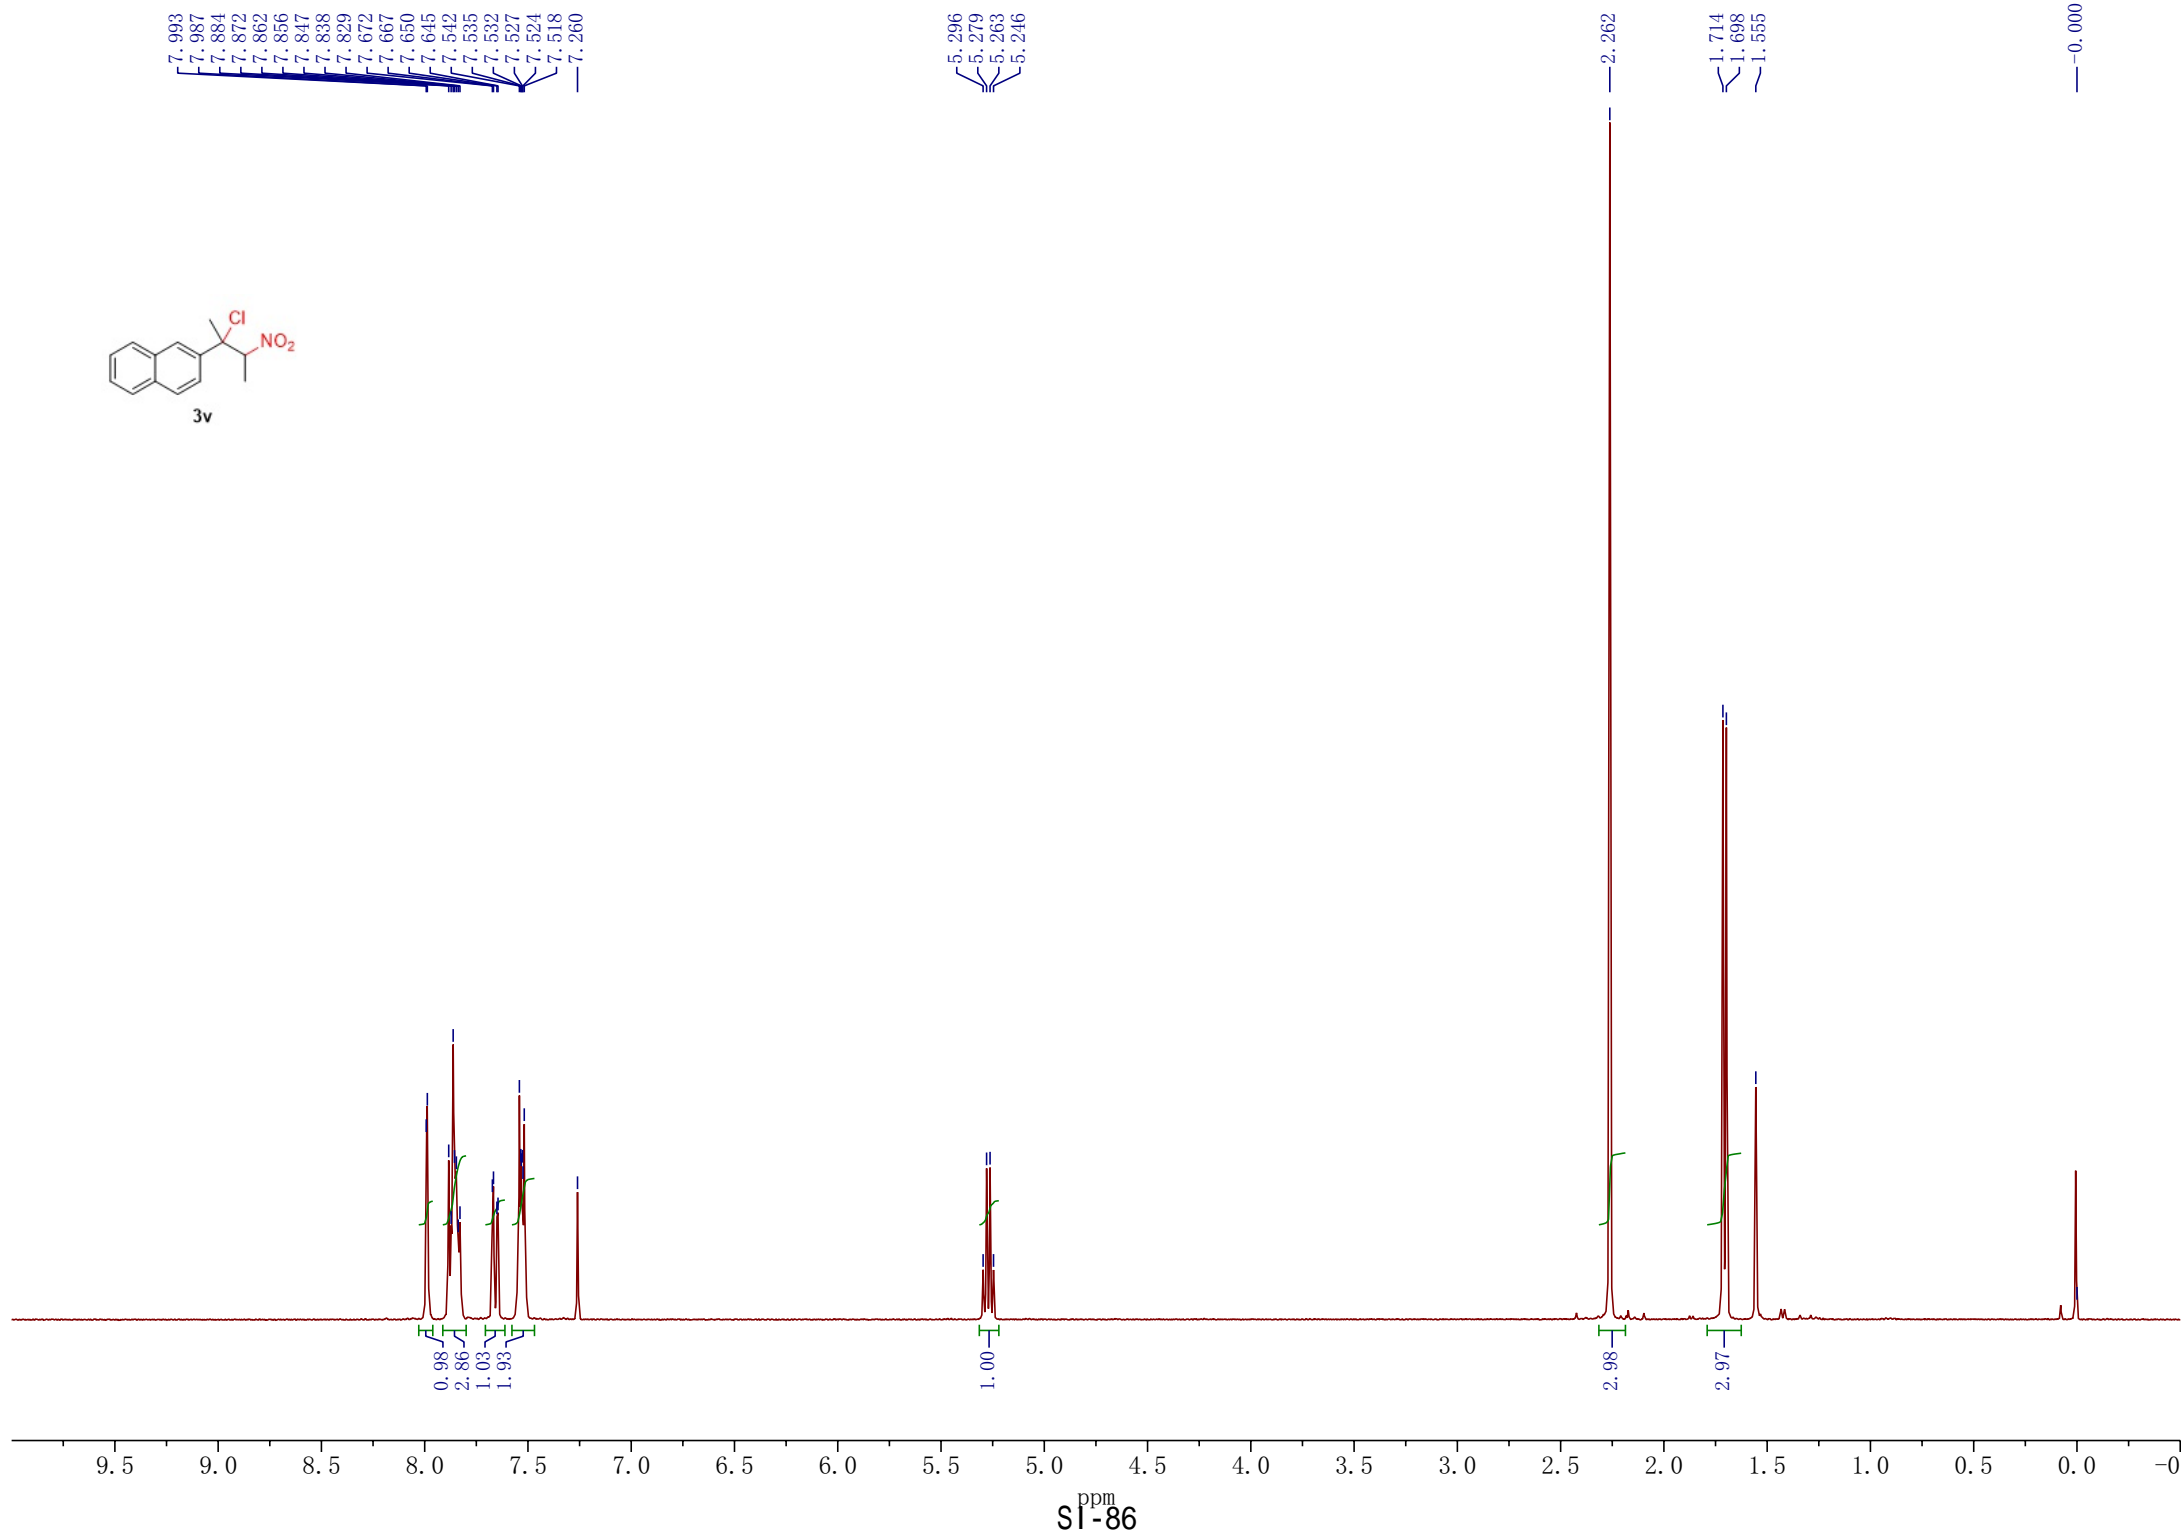

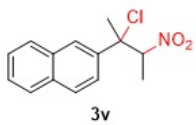

137.77  
133.03  
132.78  
128.69  
128.67  
127.62  
127.22  
126.89  
126.05  
123.97

91.48

77.48  
77.16  
76.84

71.67

27.15

15.35

30 170 160 150 140 130 120 110 100 90 80 70 60 50 40 30 20 10 0

ppm  
SI-87

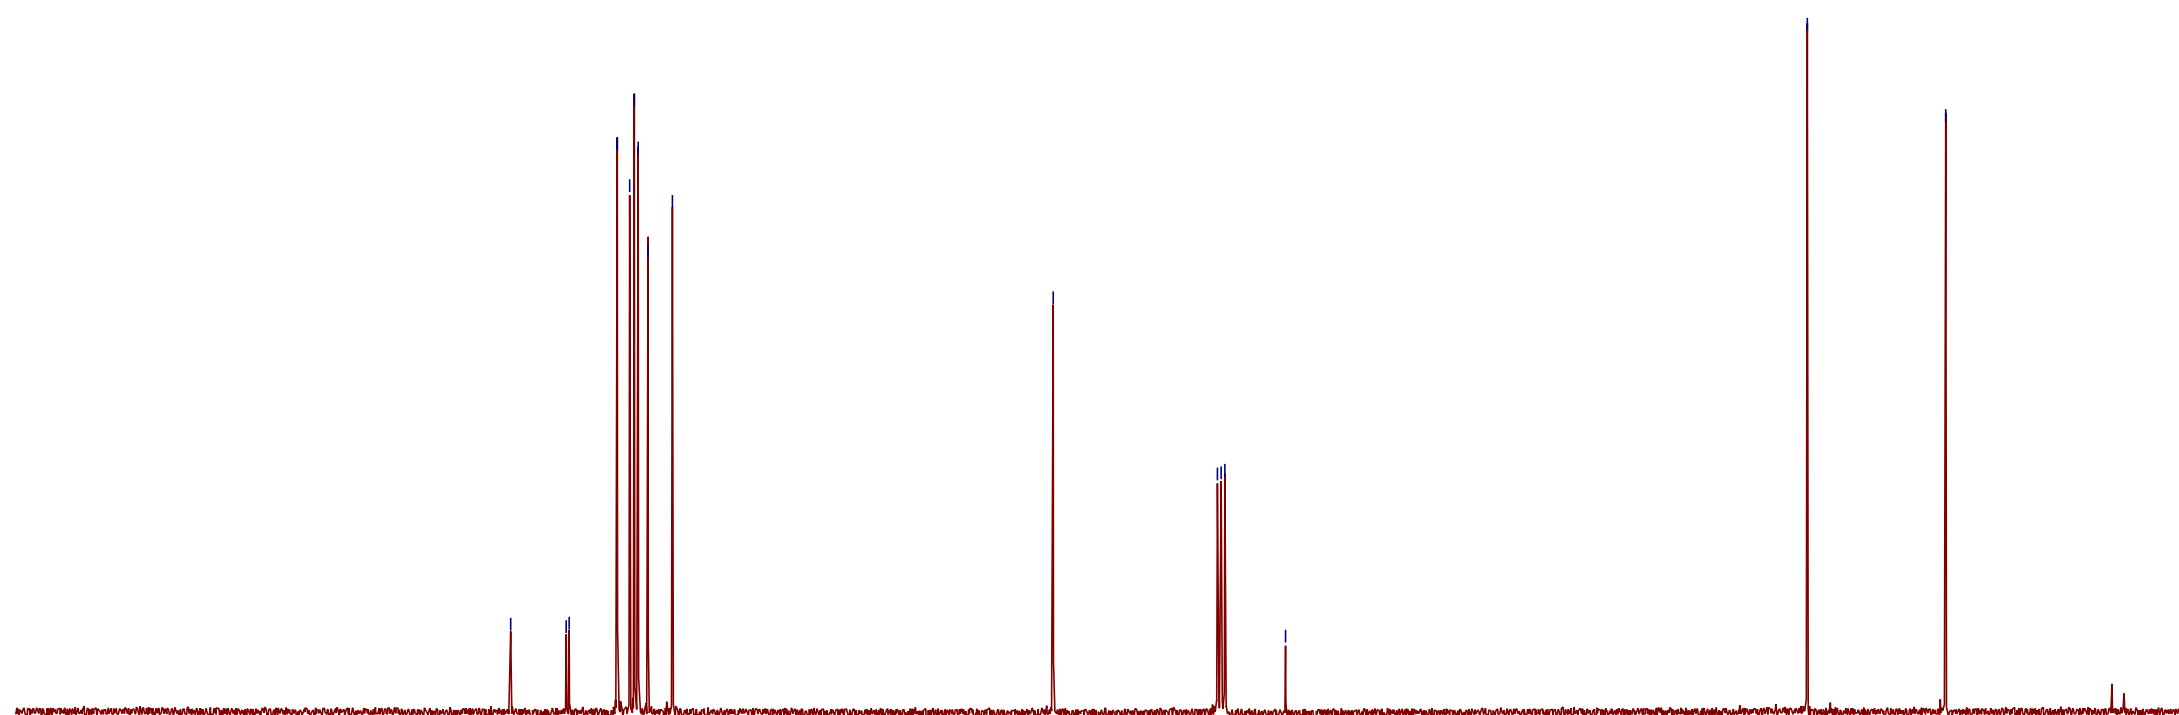

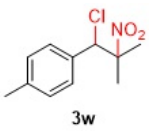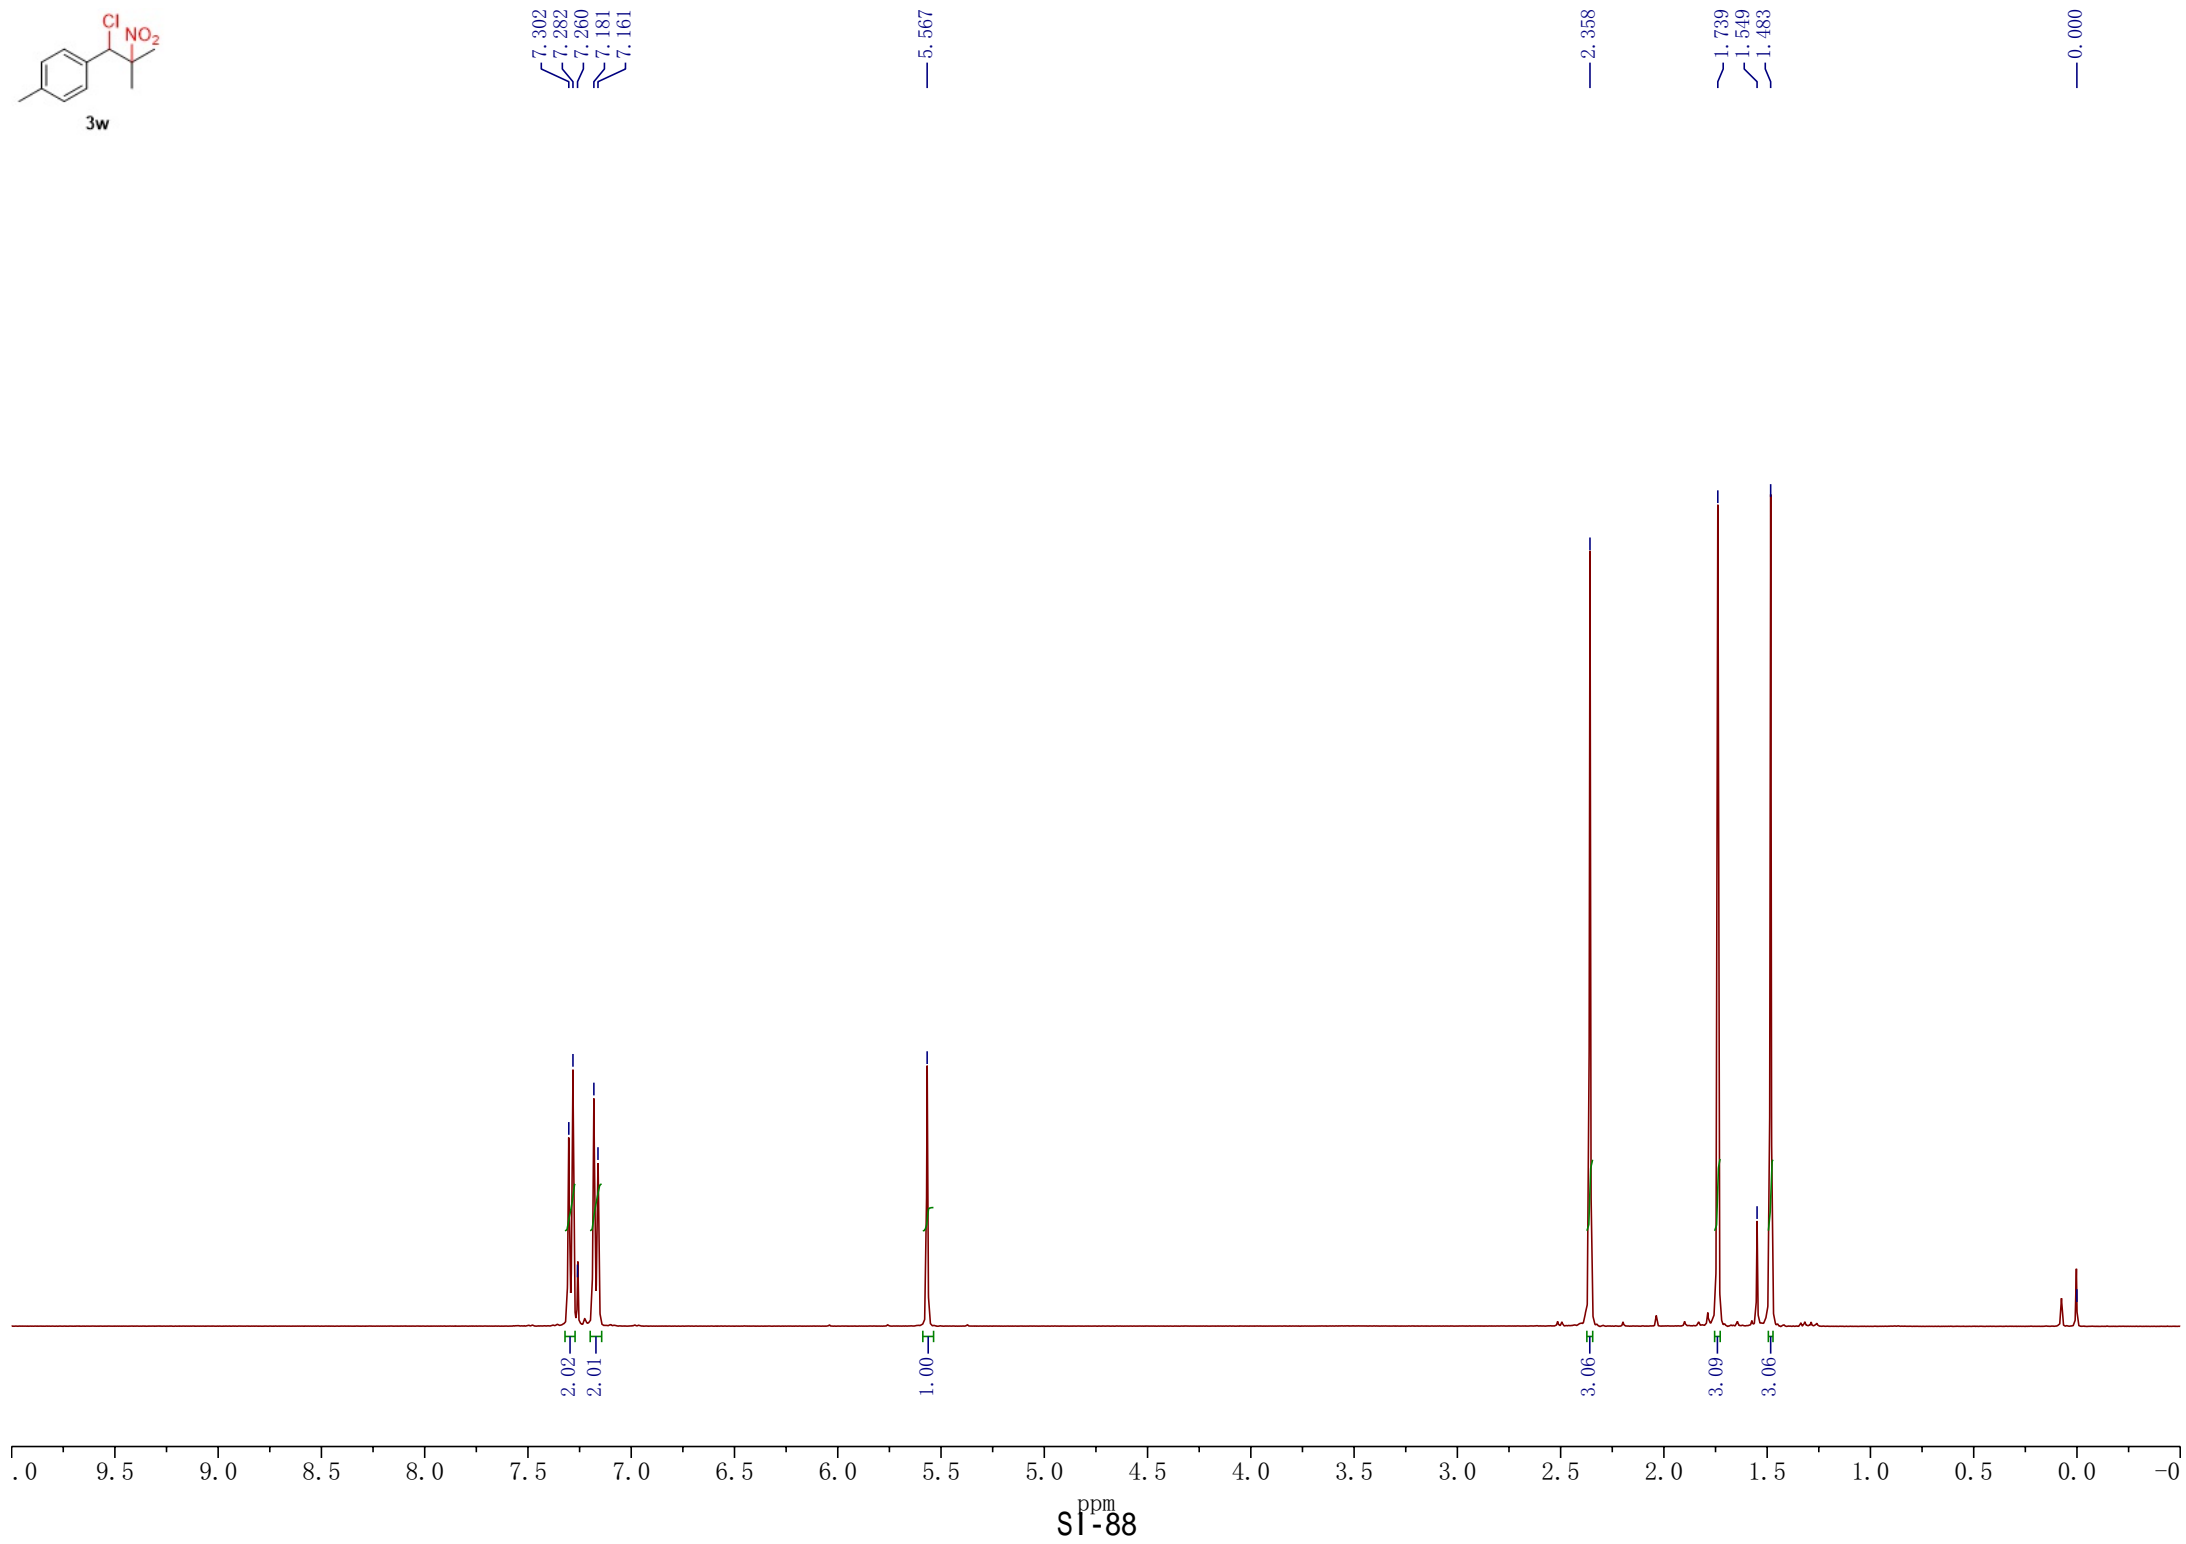



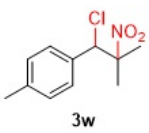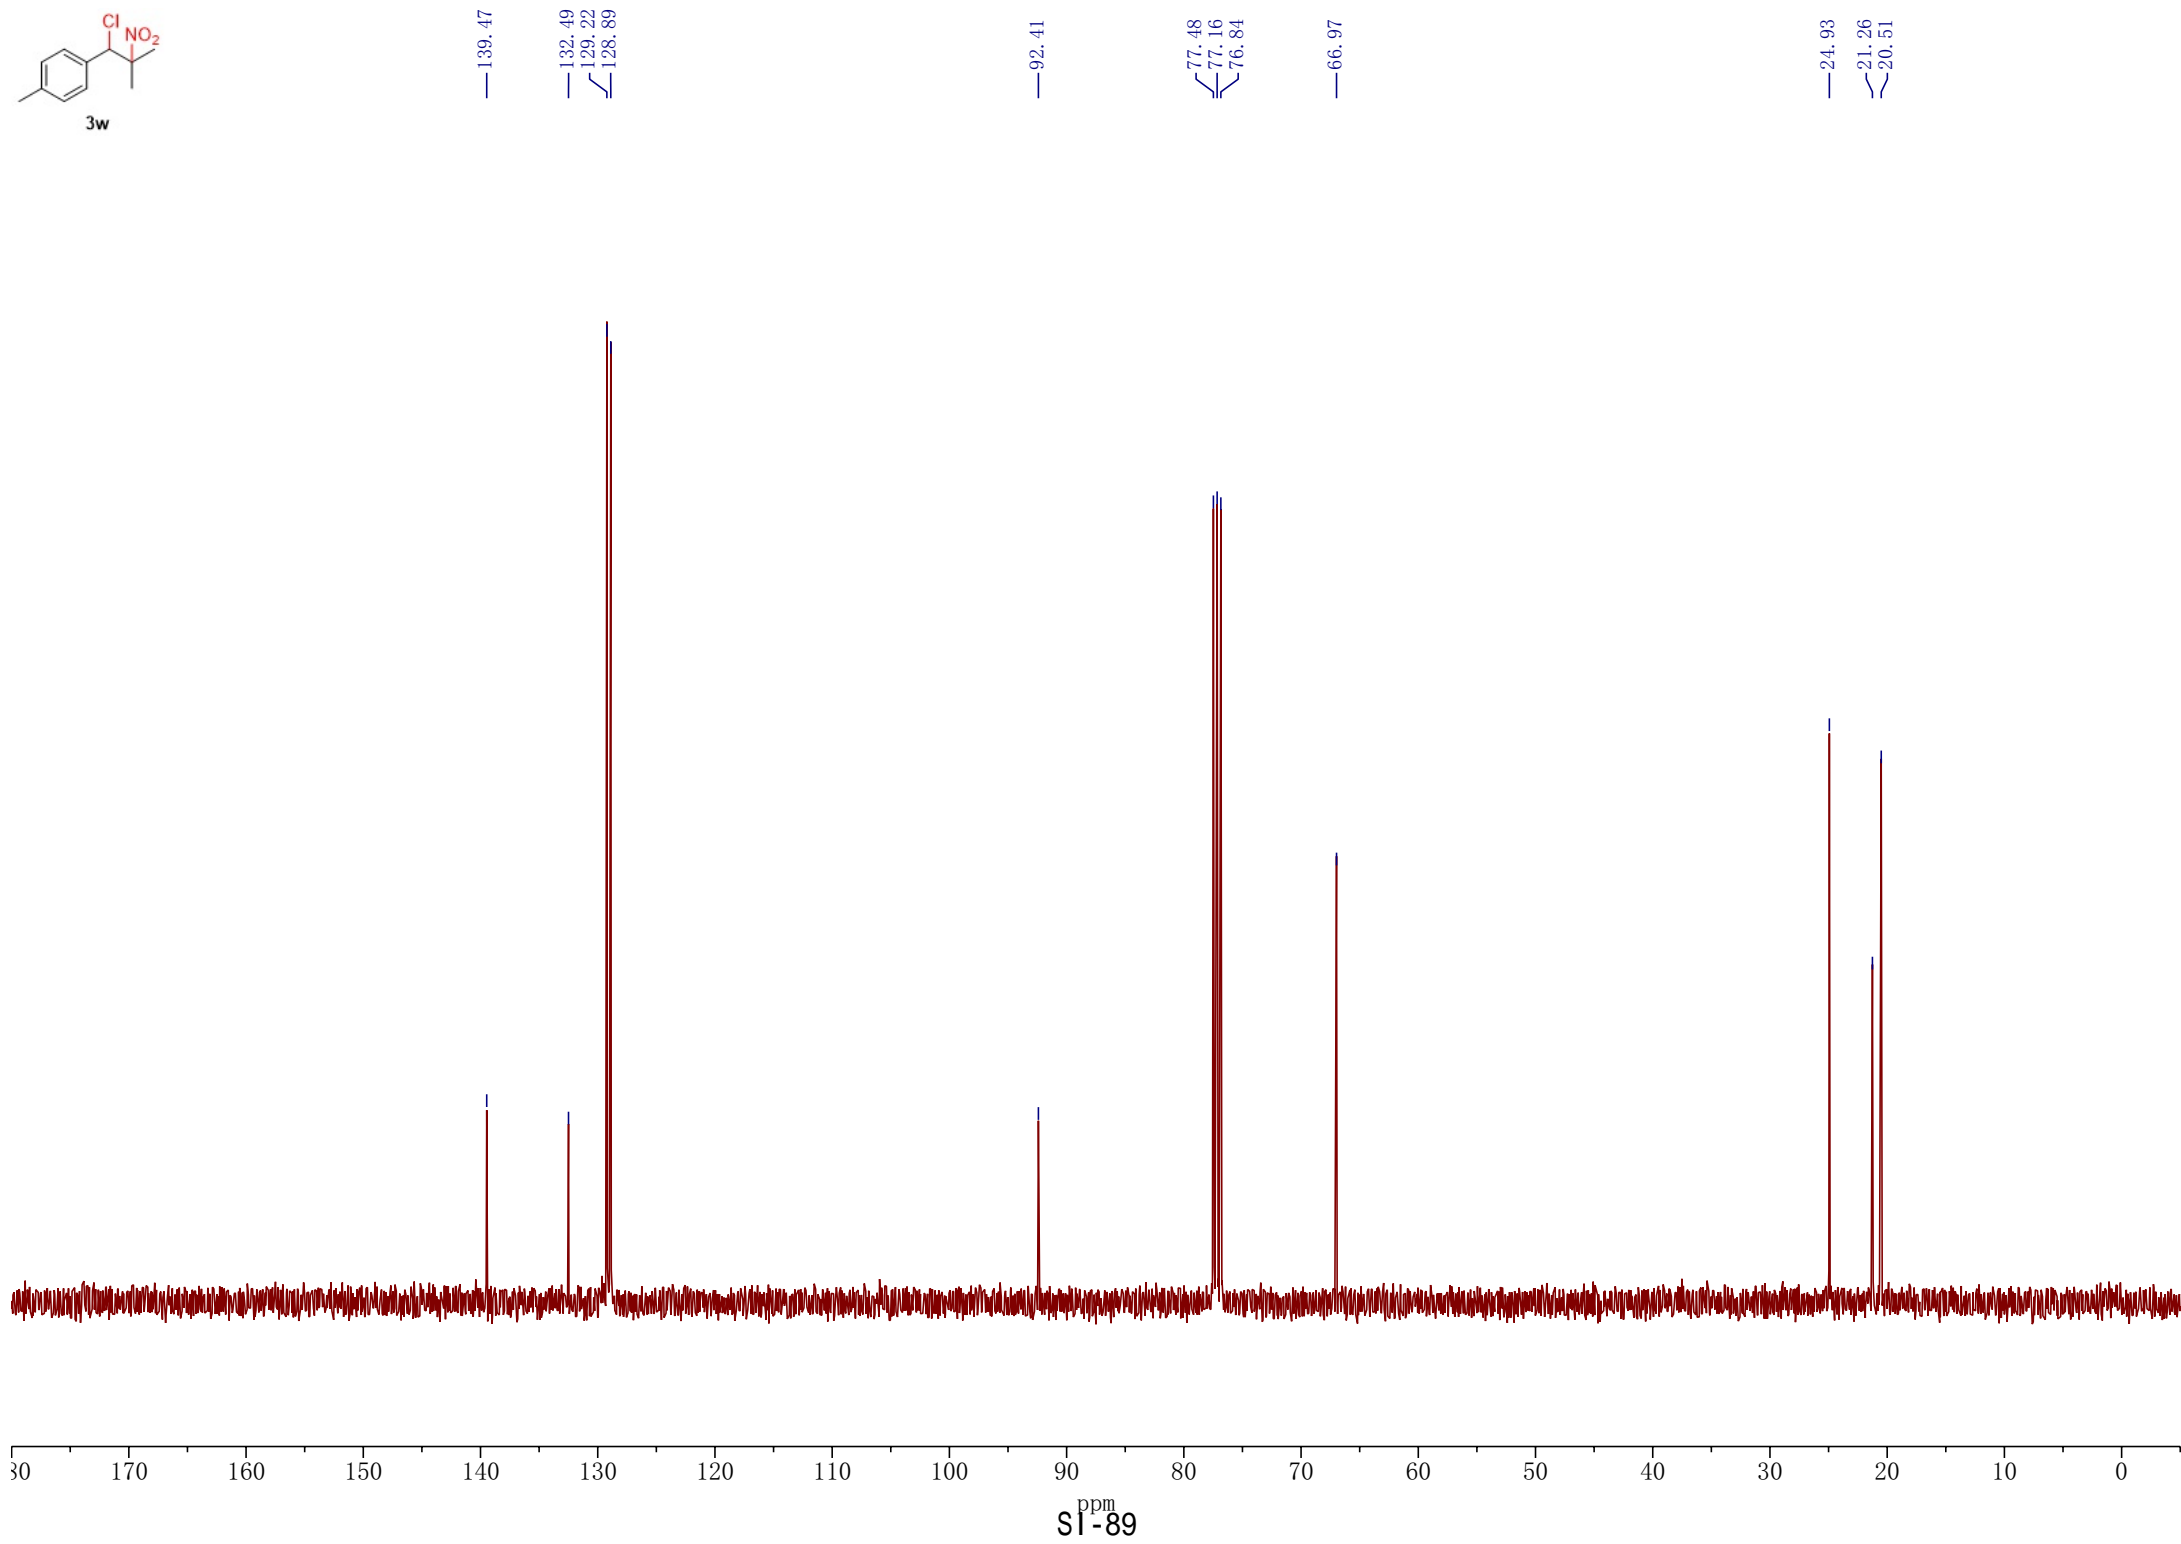

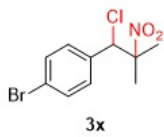

7.523  
7.502  
7.298  
7.277  
7.260

5.550

1.732  
1.560  
1.492

-0.001

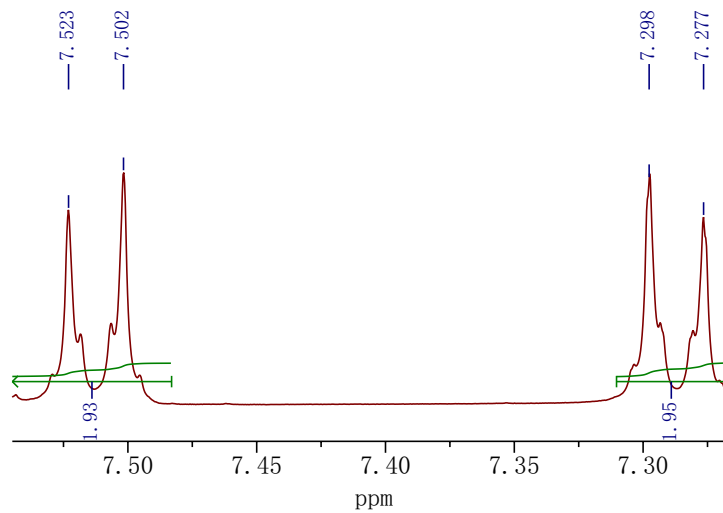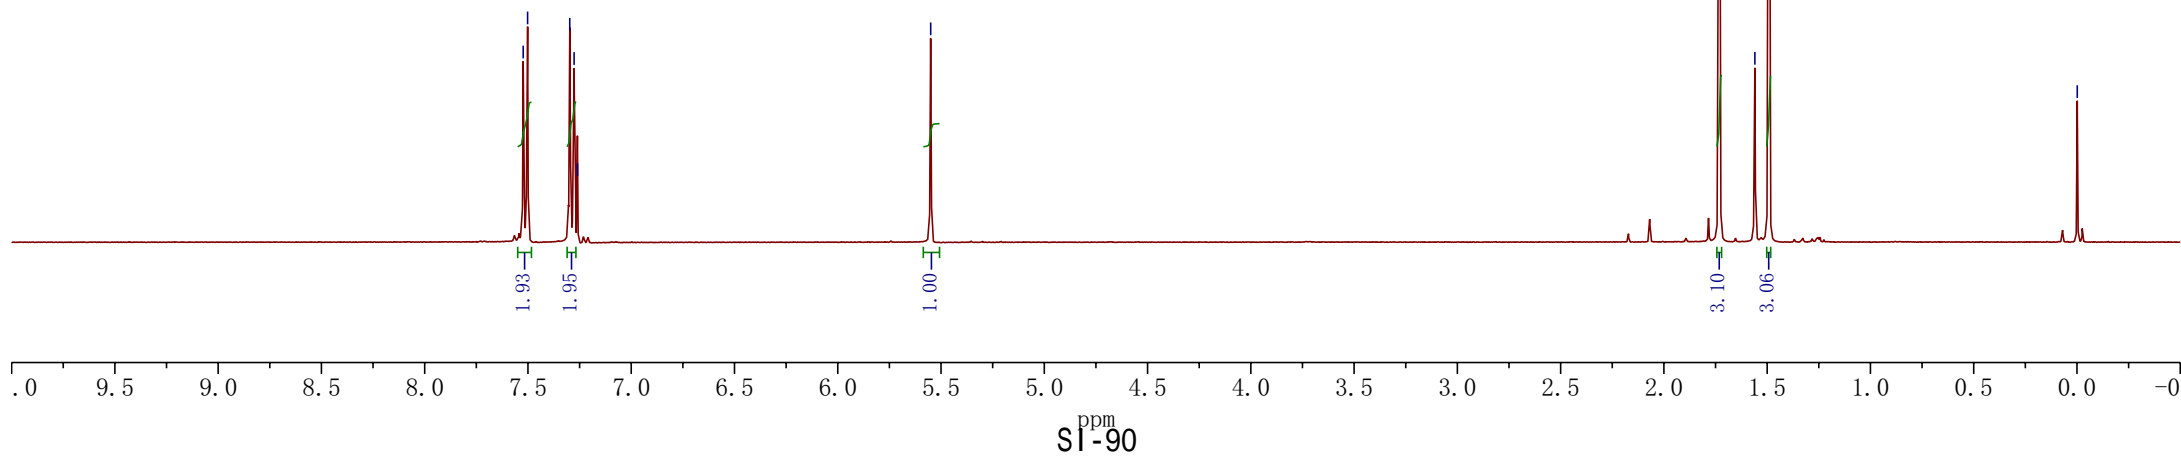

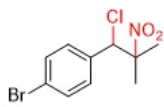

3x

134.51  
131.81  
130.60

123.73

92.03

77.48  
77.16  
76.84

66.20

24.46

20.89

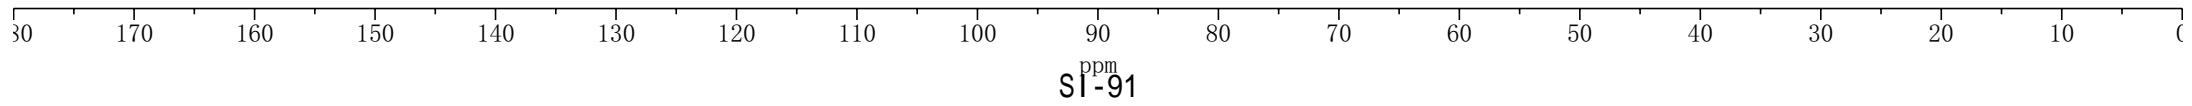

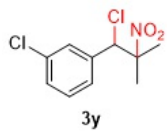

7.433  
7.428  
7.424  
7.375  
7.370  
7.365  
7.356  
7.351  
7.346  
7.334  
7.316  
7.297  
7.293  
7.288  
7.274  
7.260

5.560

1.749

1.510

0.071

0.000

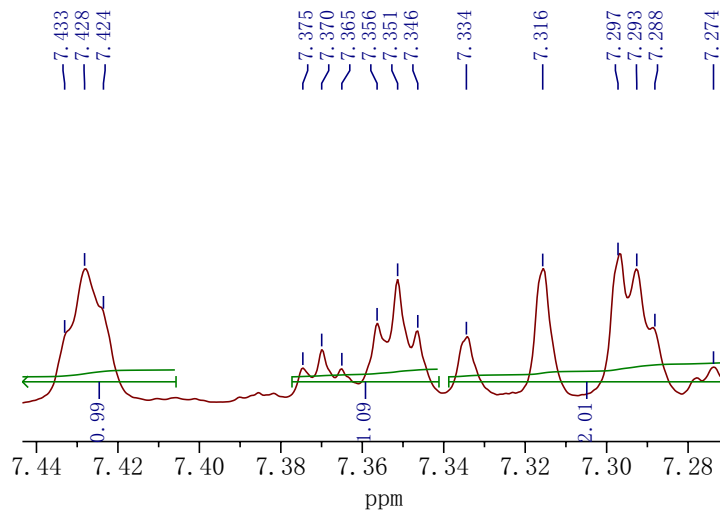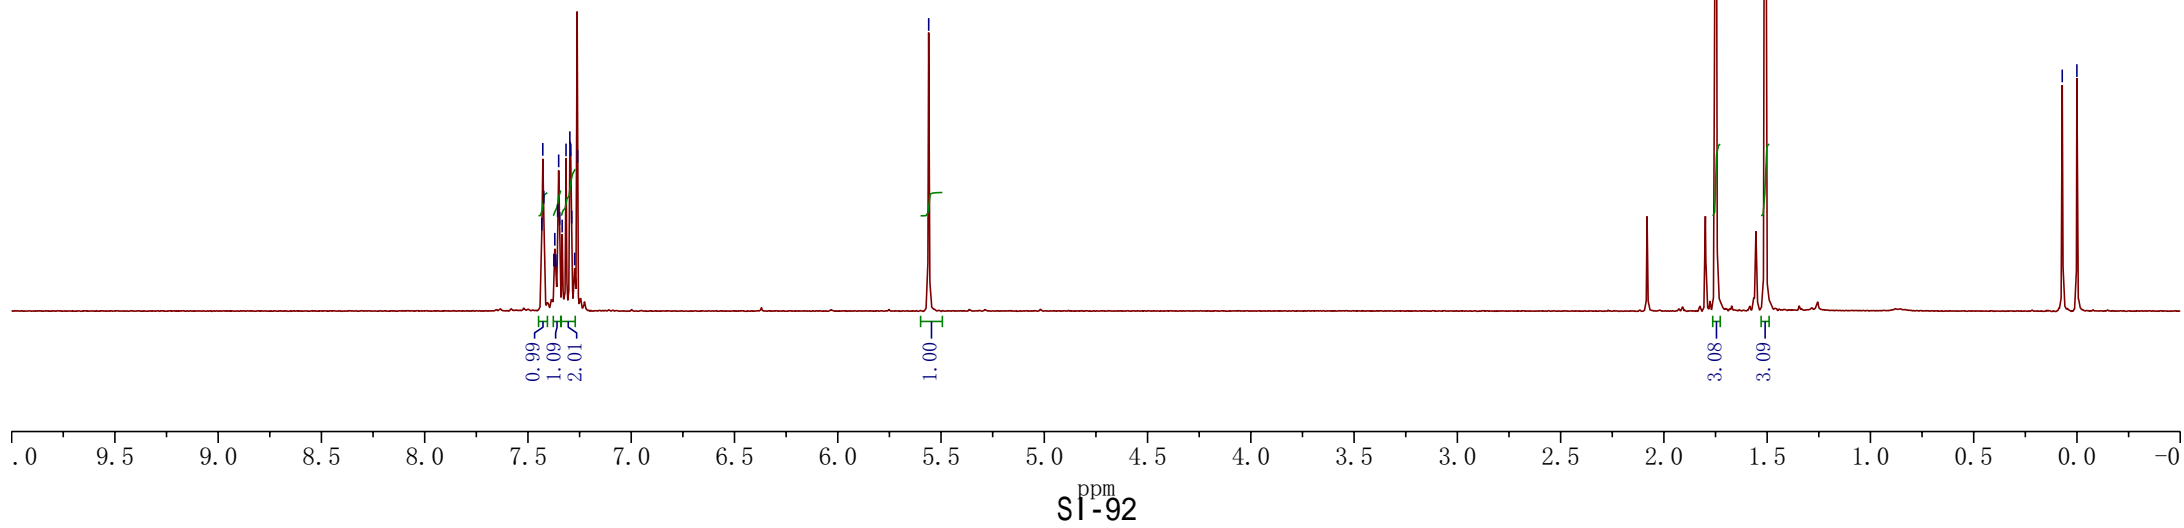

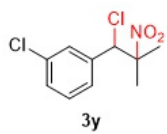

— 137.45  
— 134.65  
— 129.84  
— 129.72  
— 129.14  
— 127.24

— 92.05

— 77.48  
— 77.16  
— 76.84

— 66.03

— 24.62

— 20.86

30 170 160 150 140 130 120 110 100 90 80 70 60 50 40 30 20 10 0

ppm  
SI-93

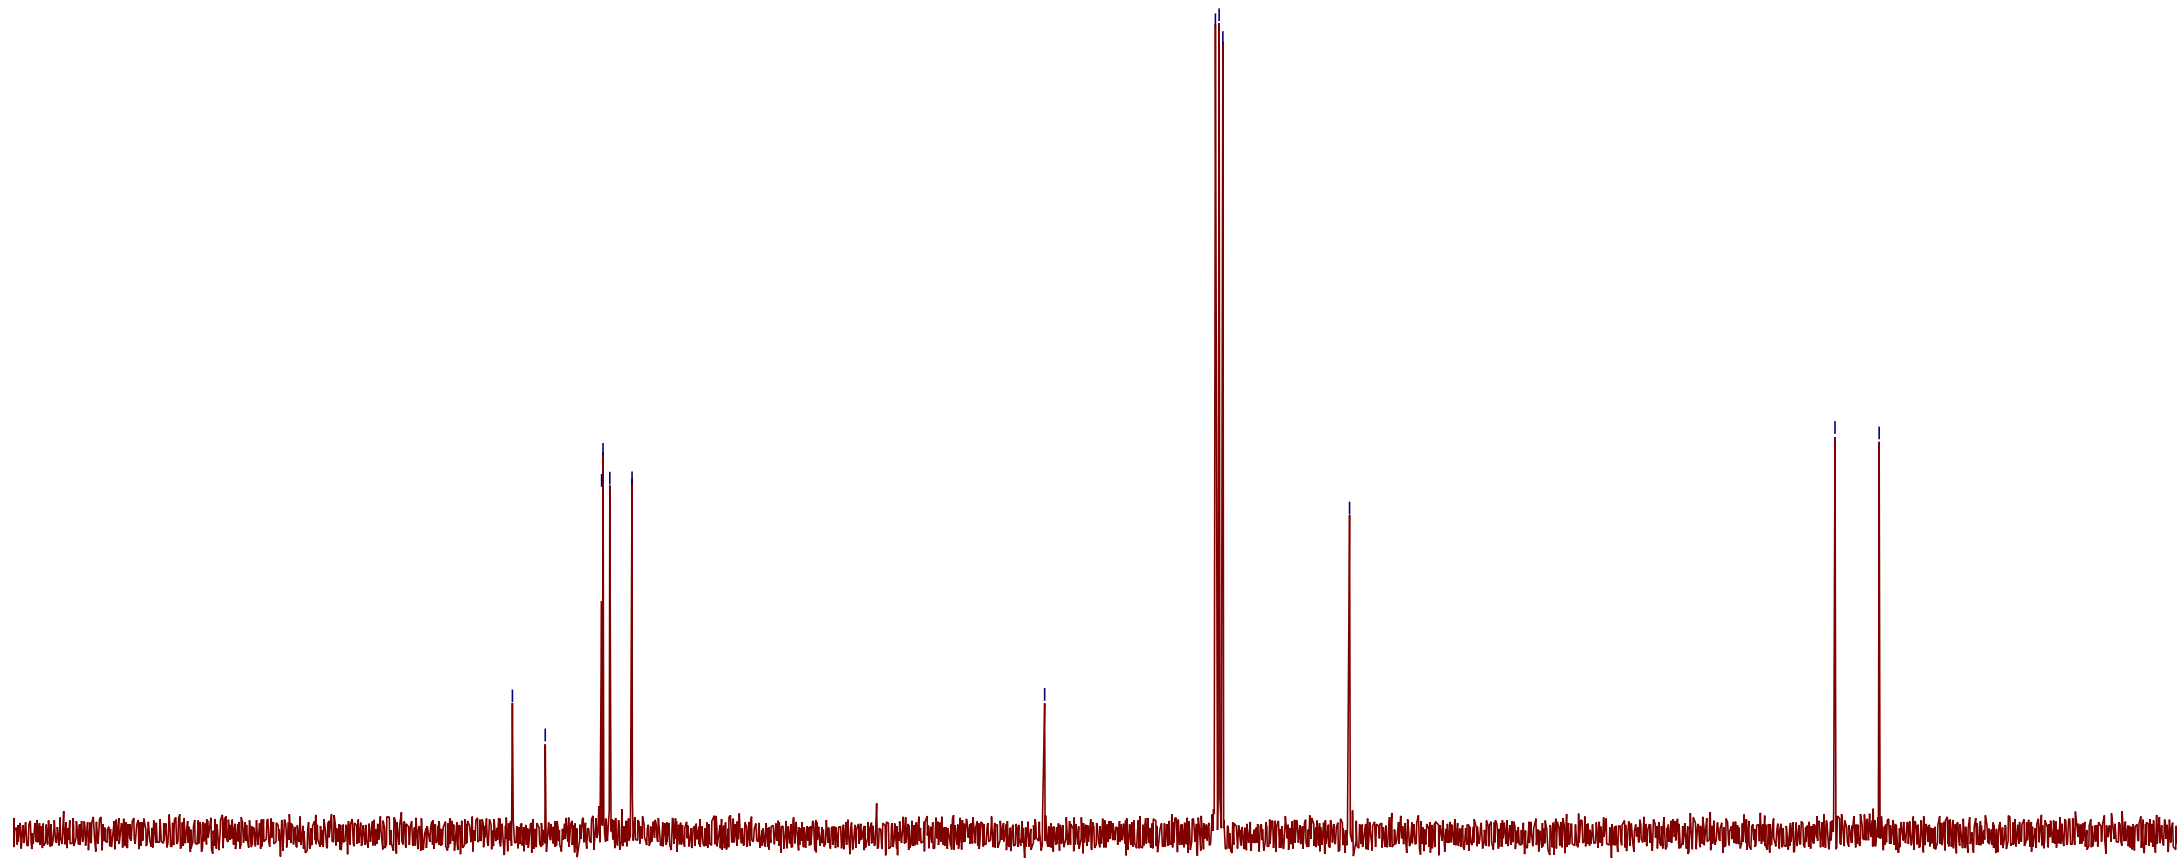

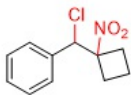

3z

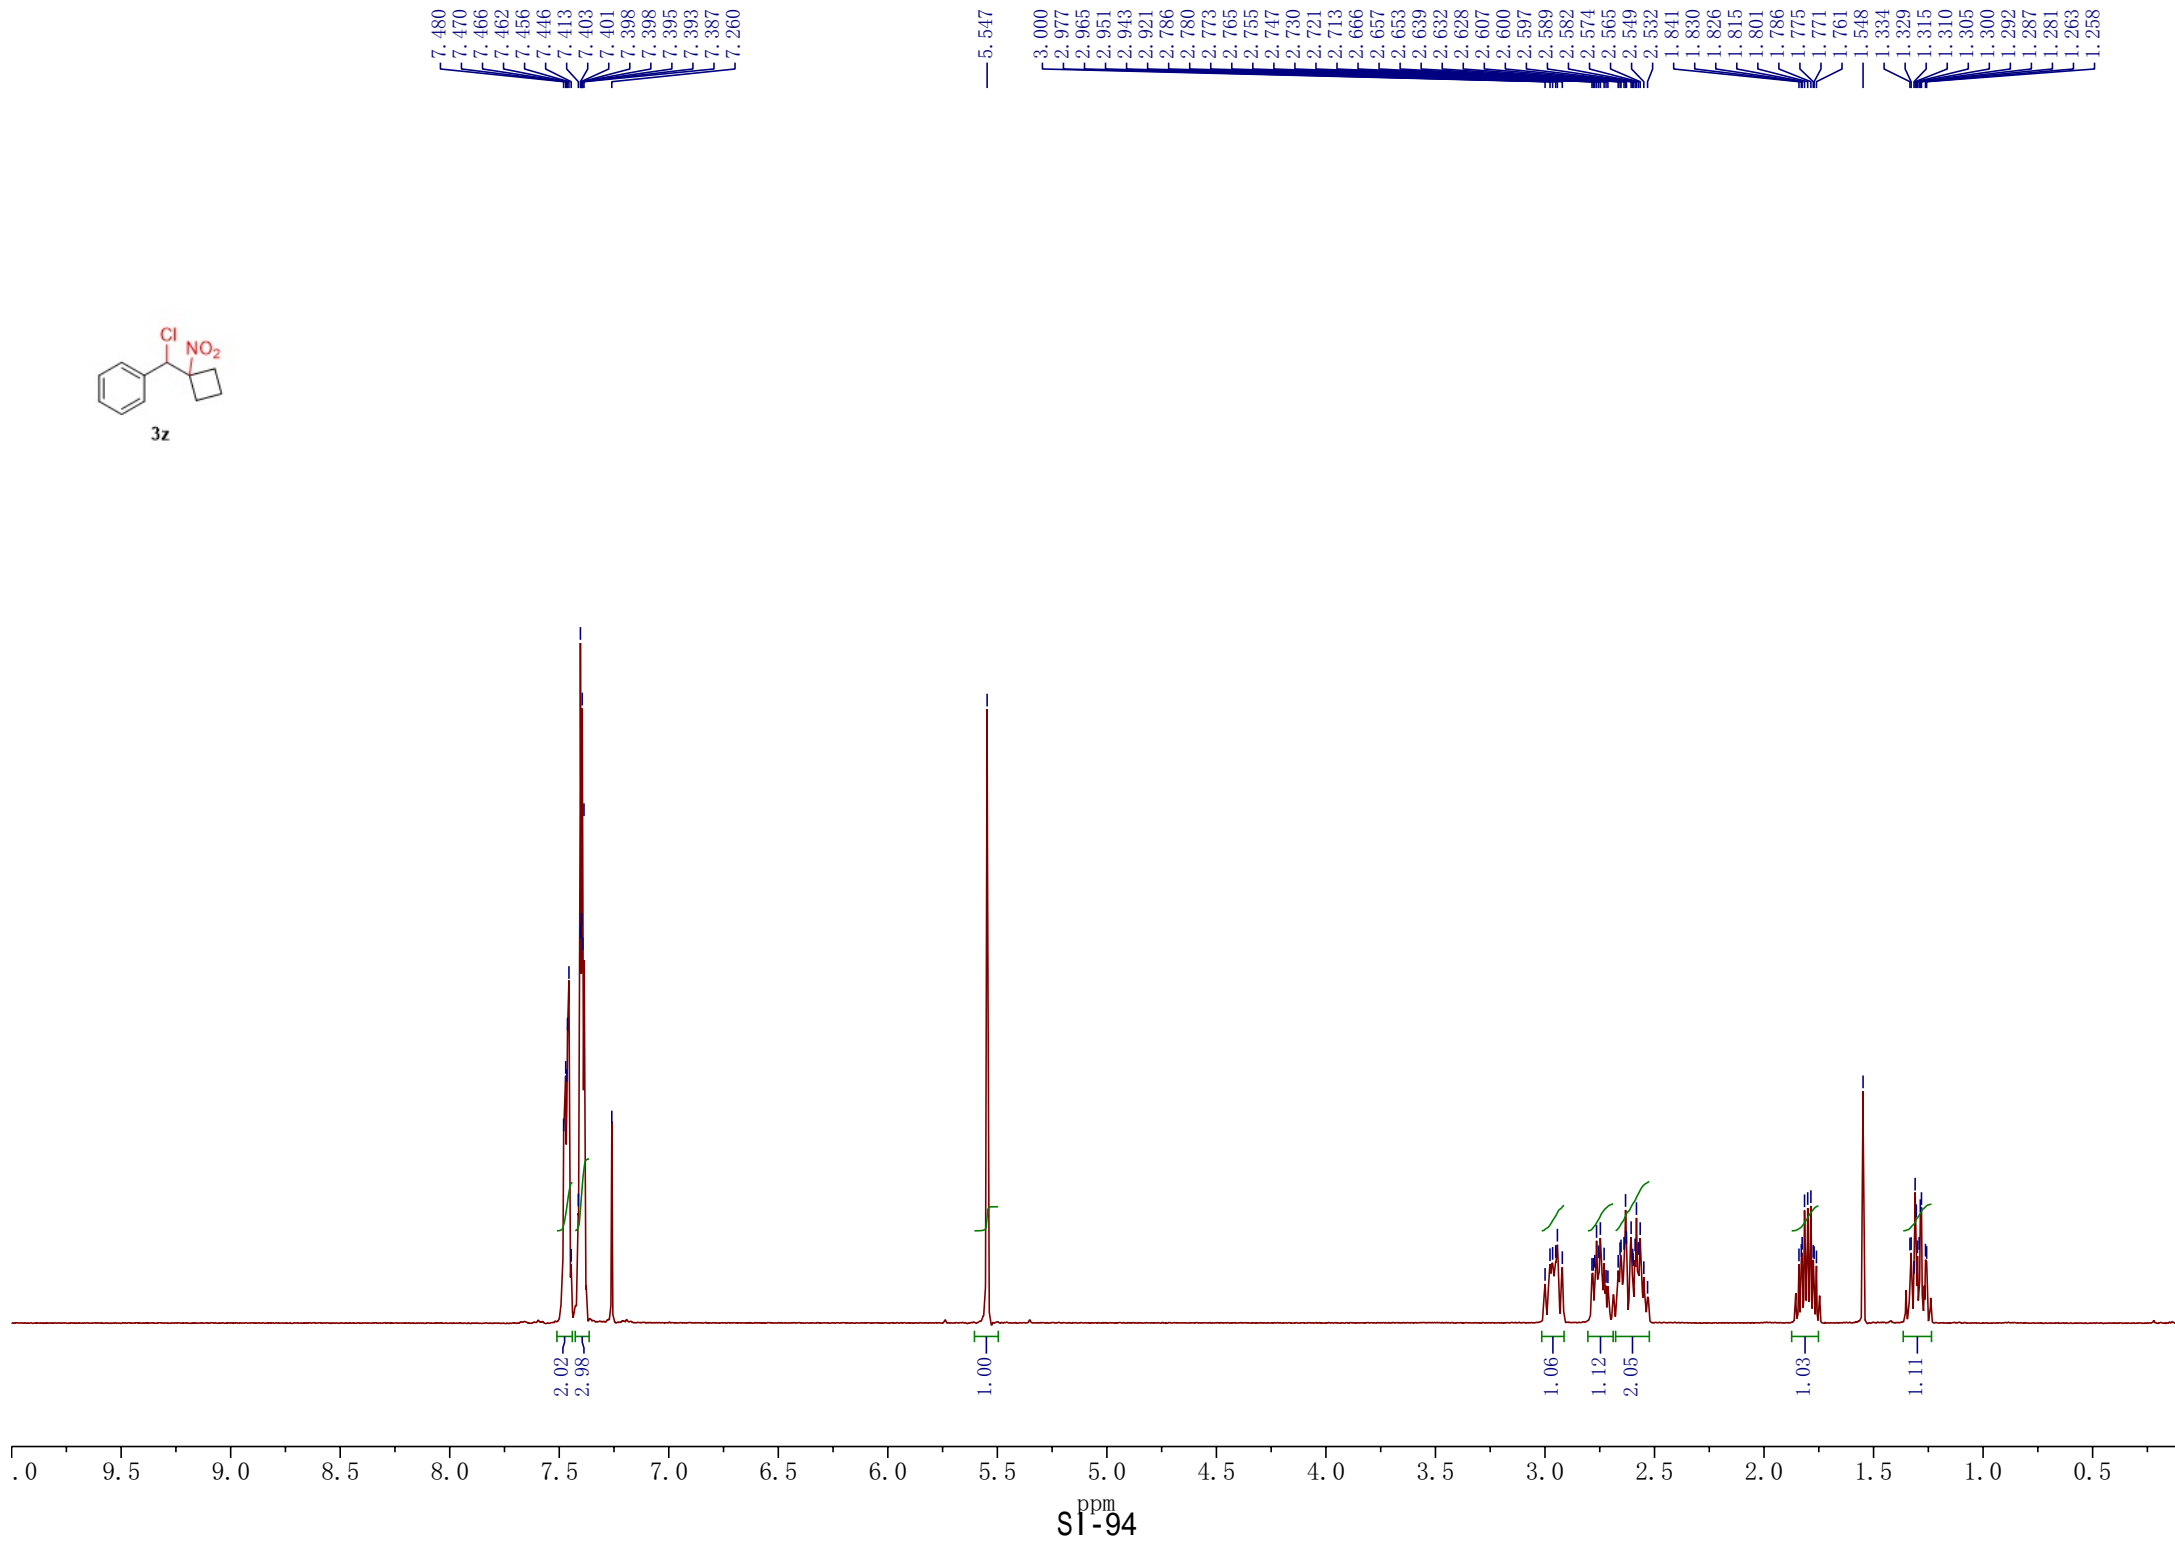

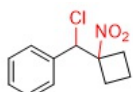

3z

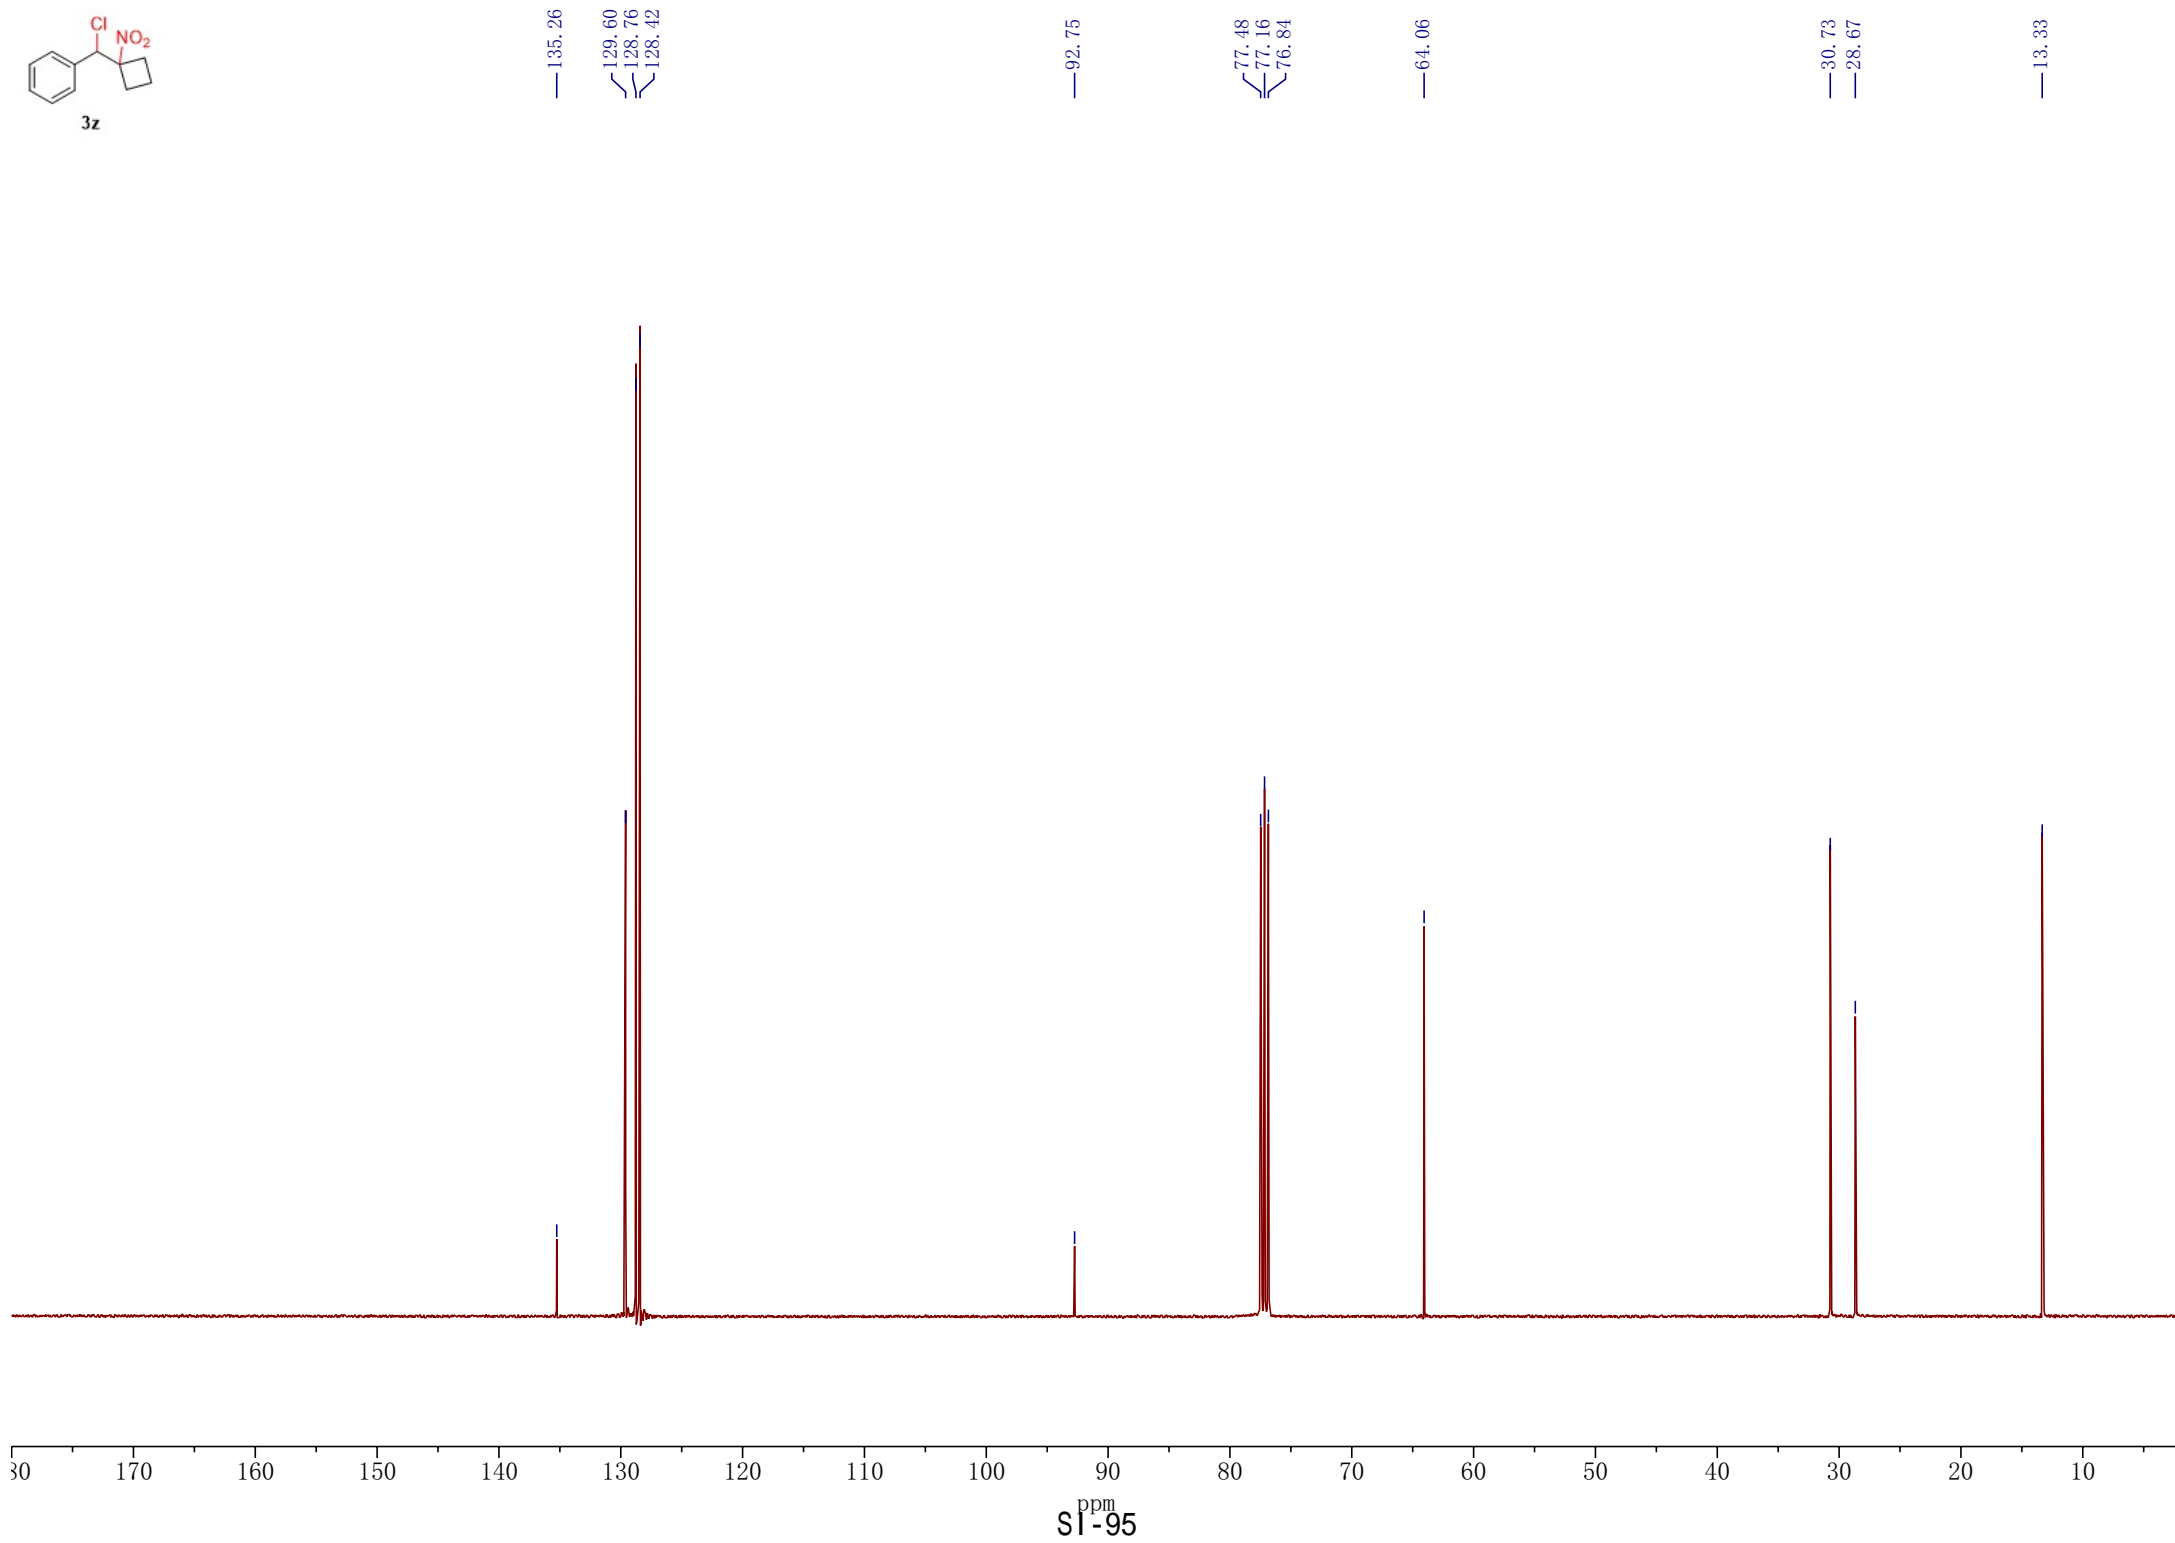

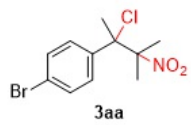

7.488  
7.466  
7.396  
7.374  
7.260

2.160

1.753  
1.642  
1.566

-0.003

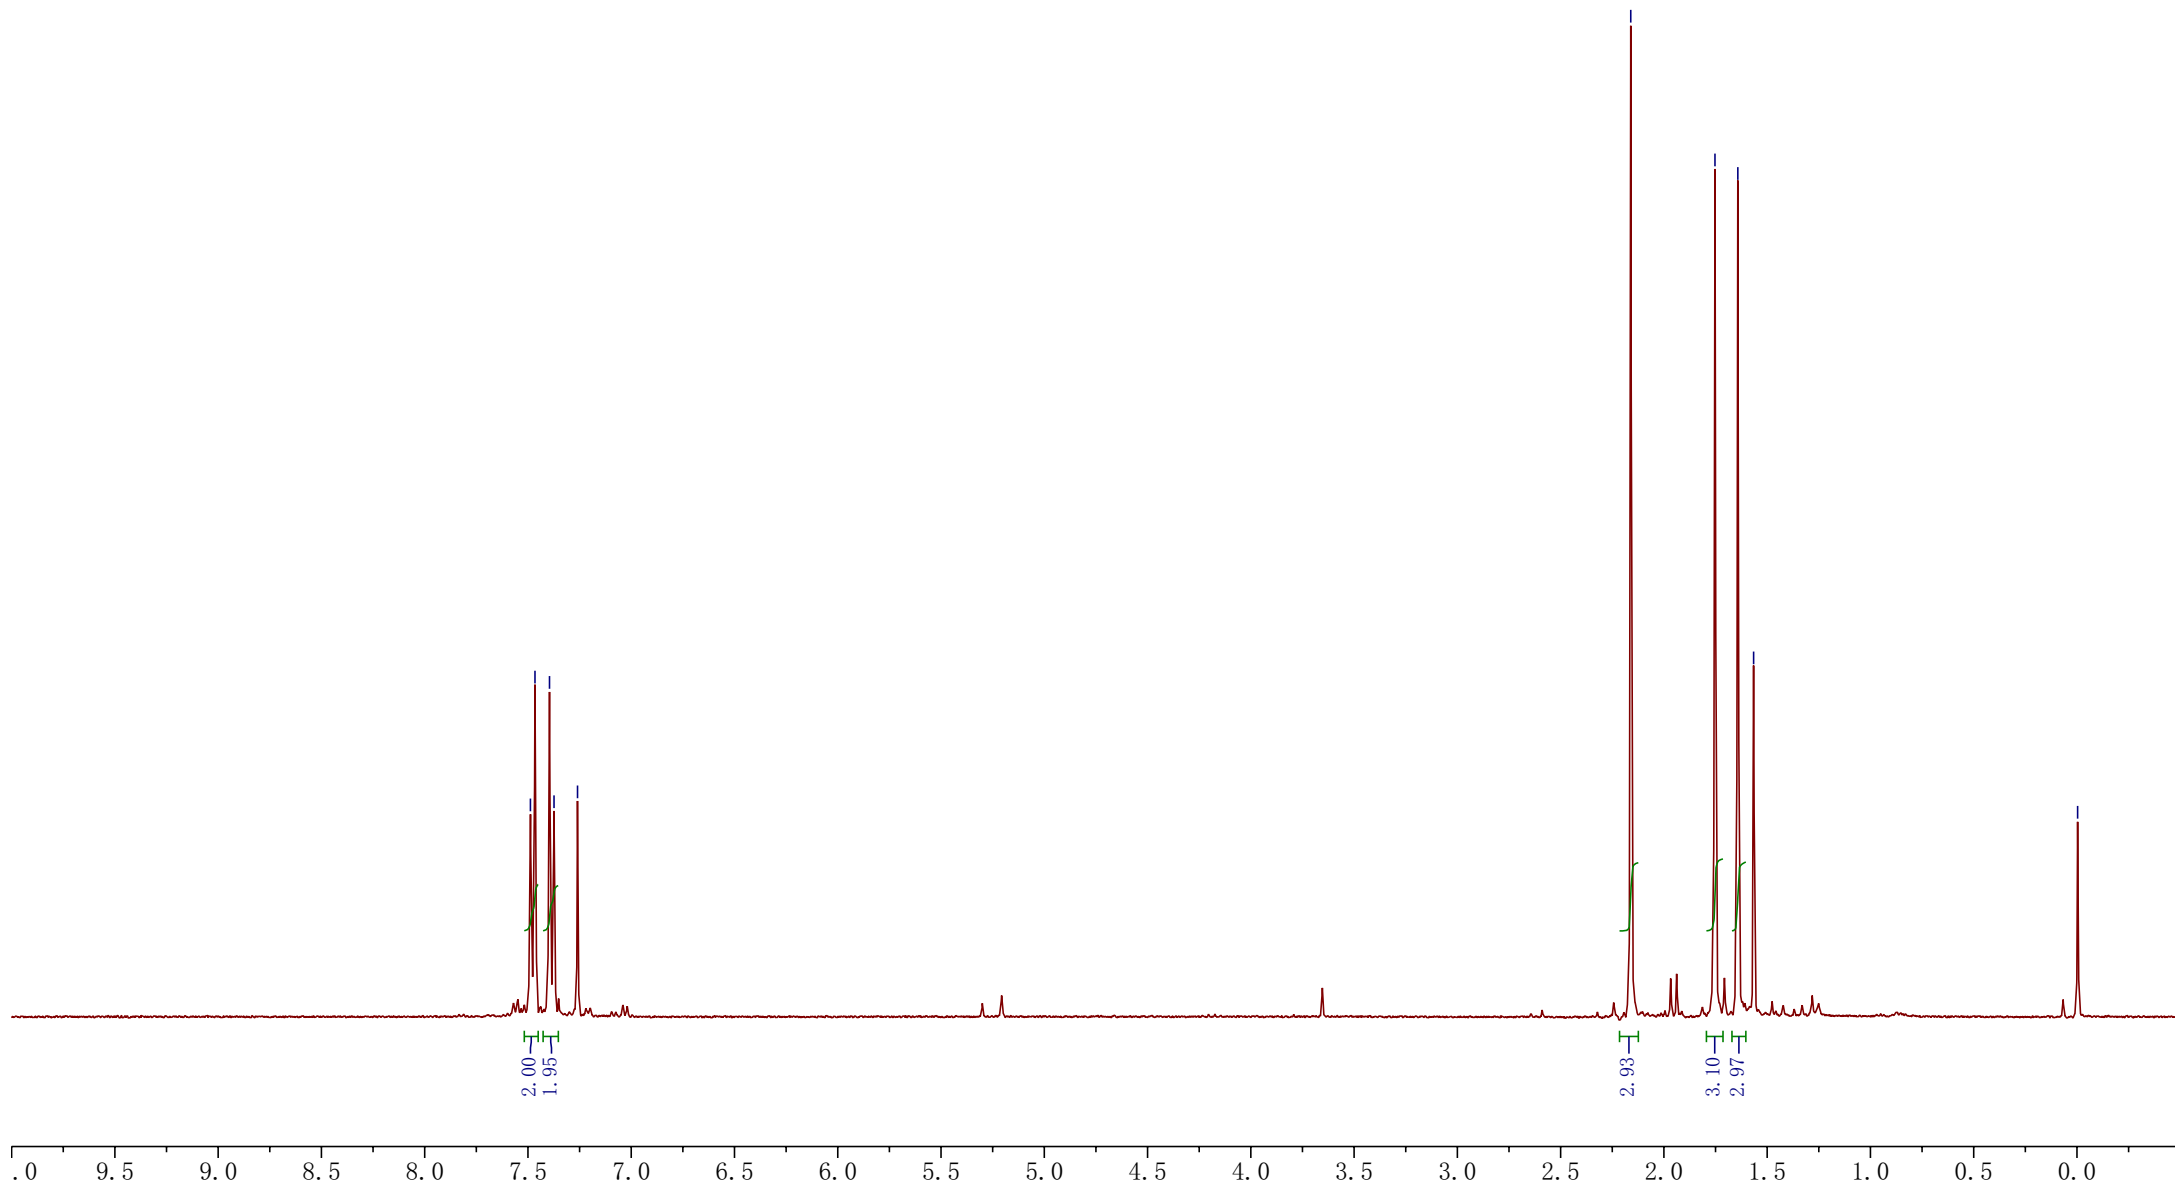

SI-96



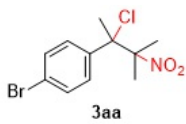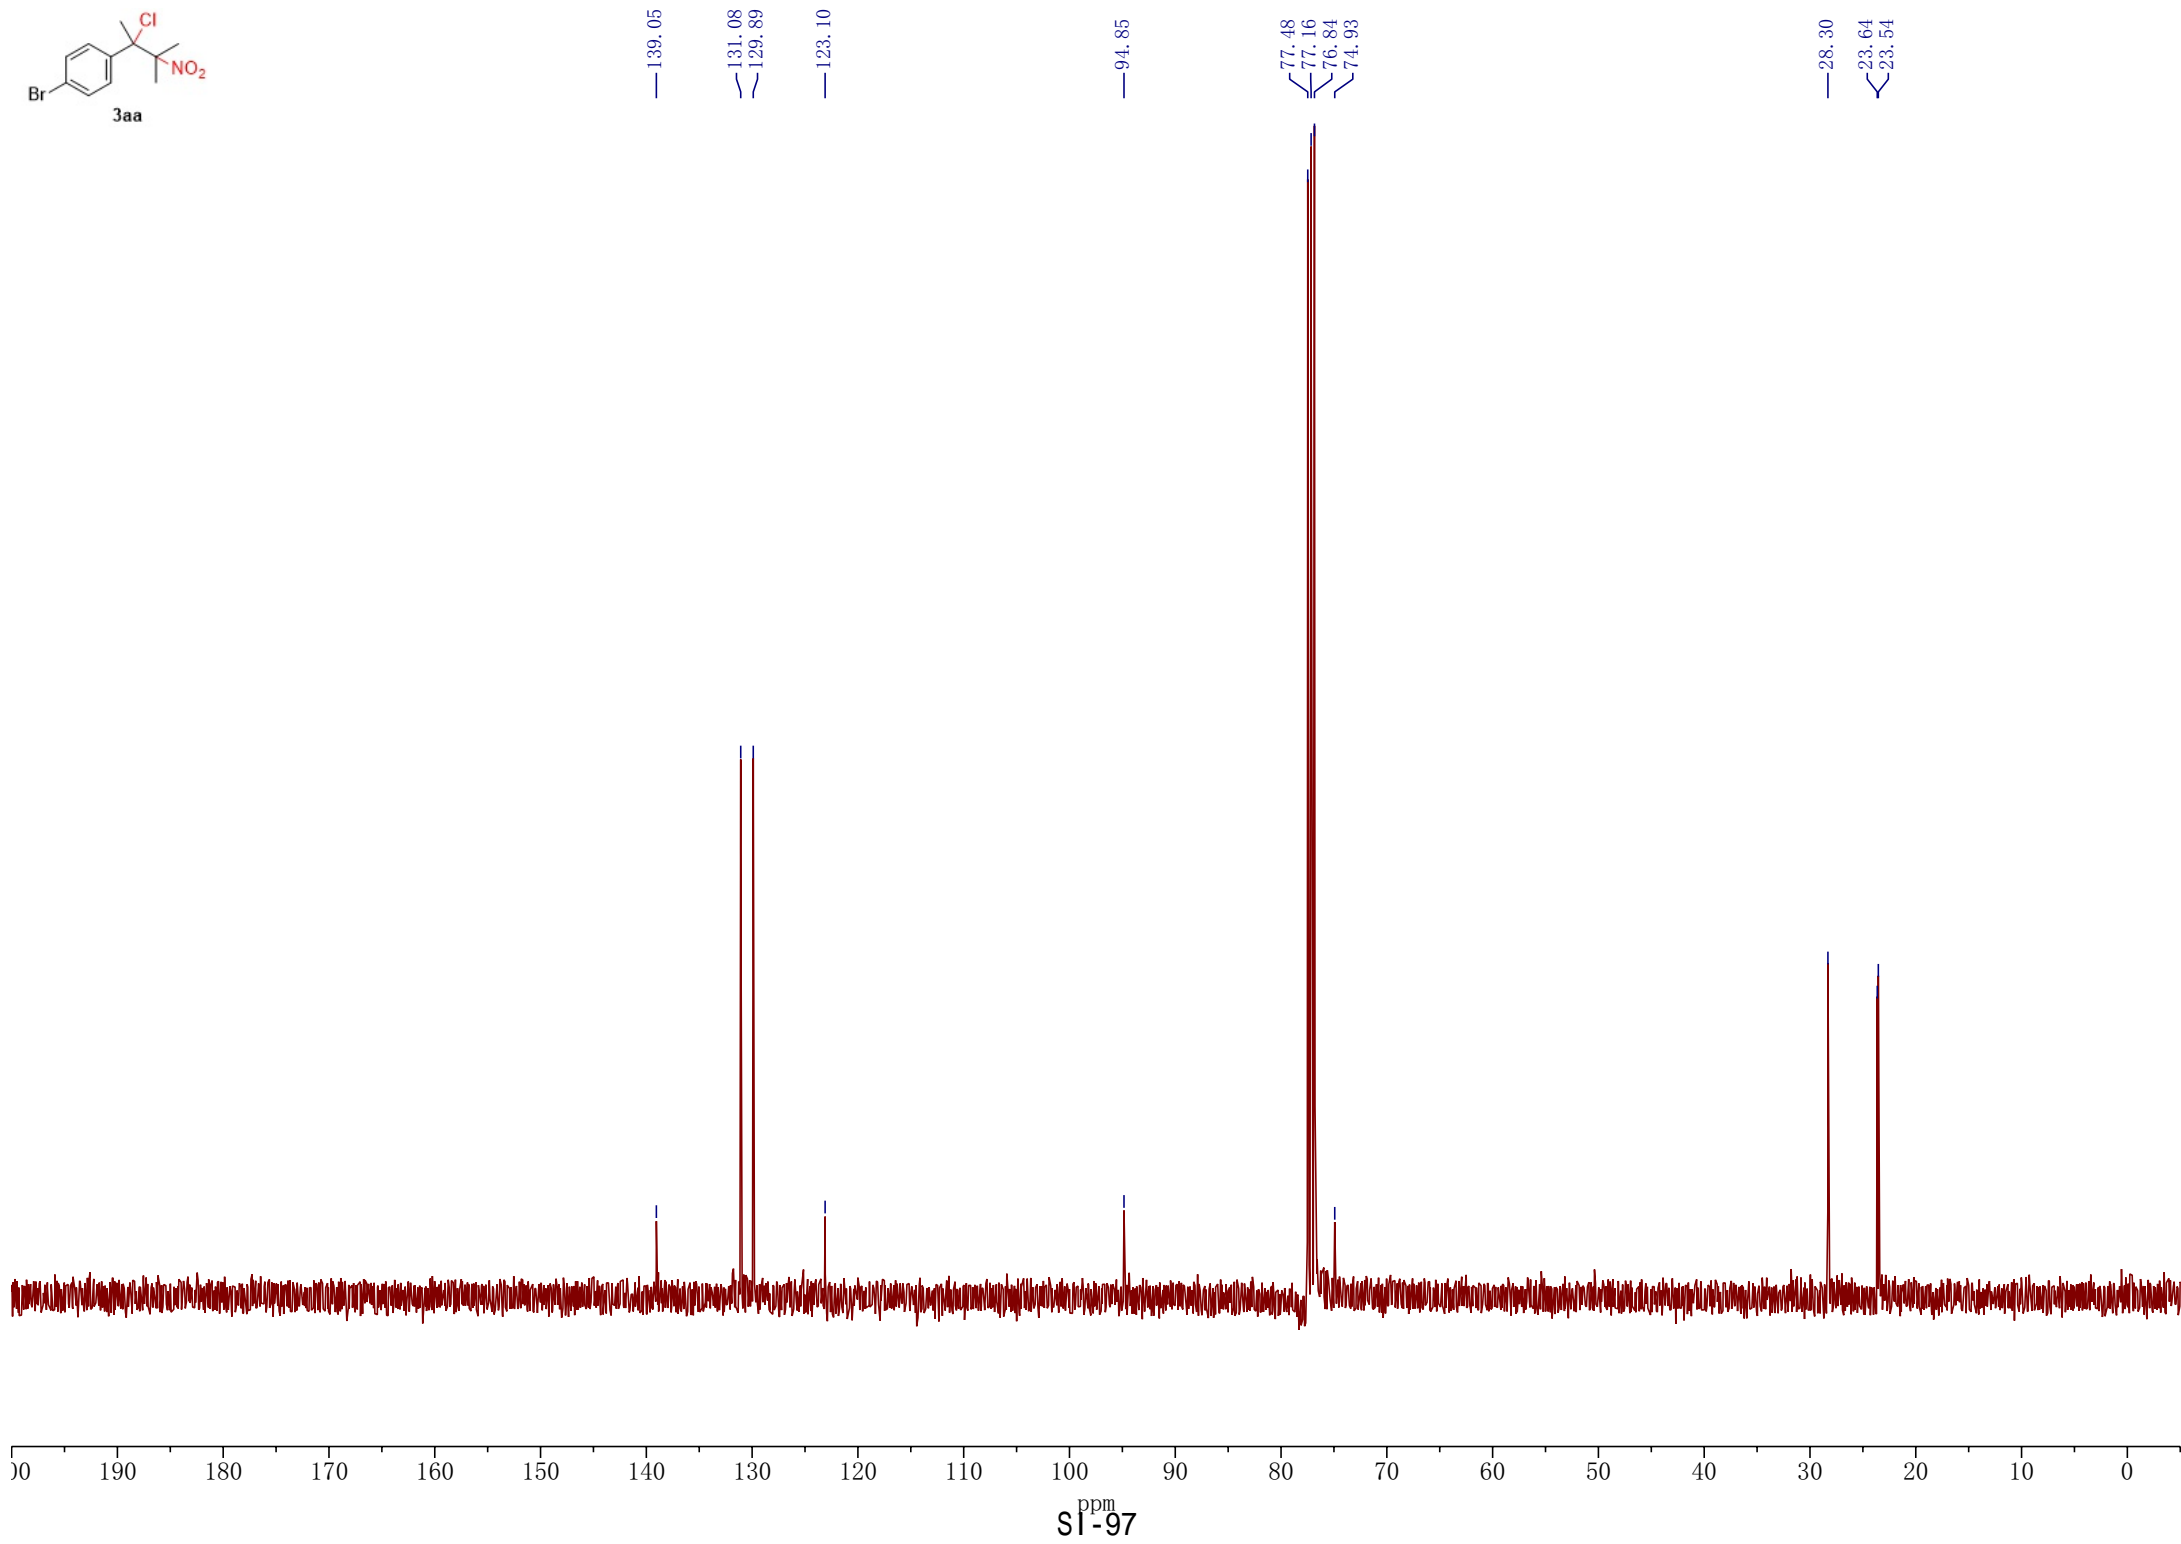

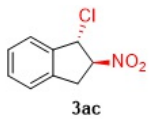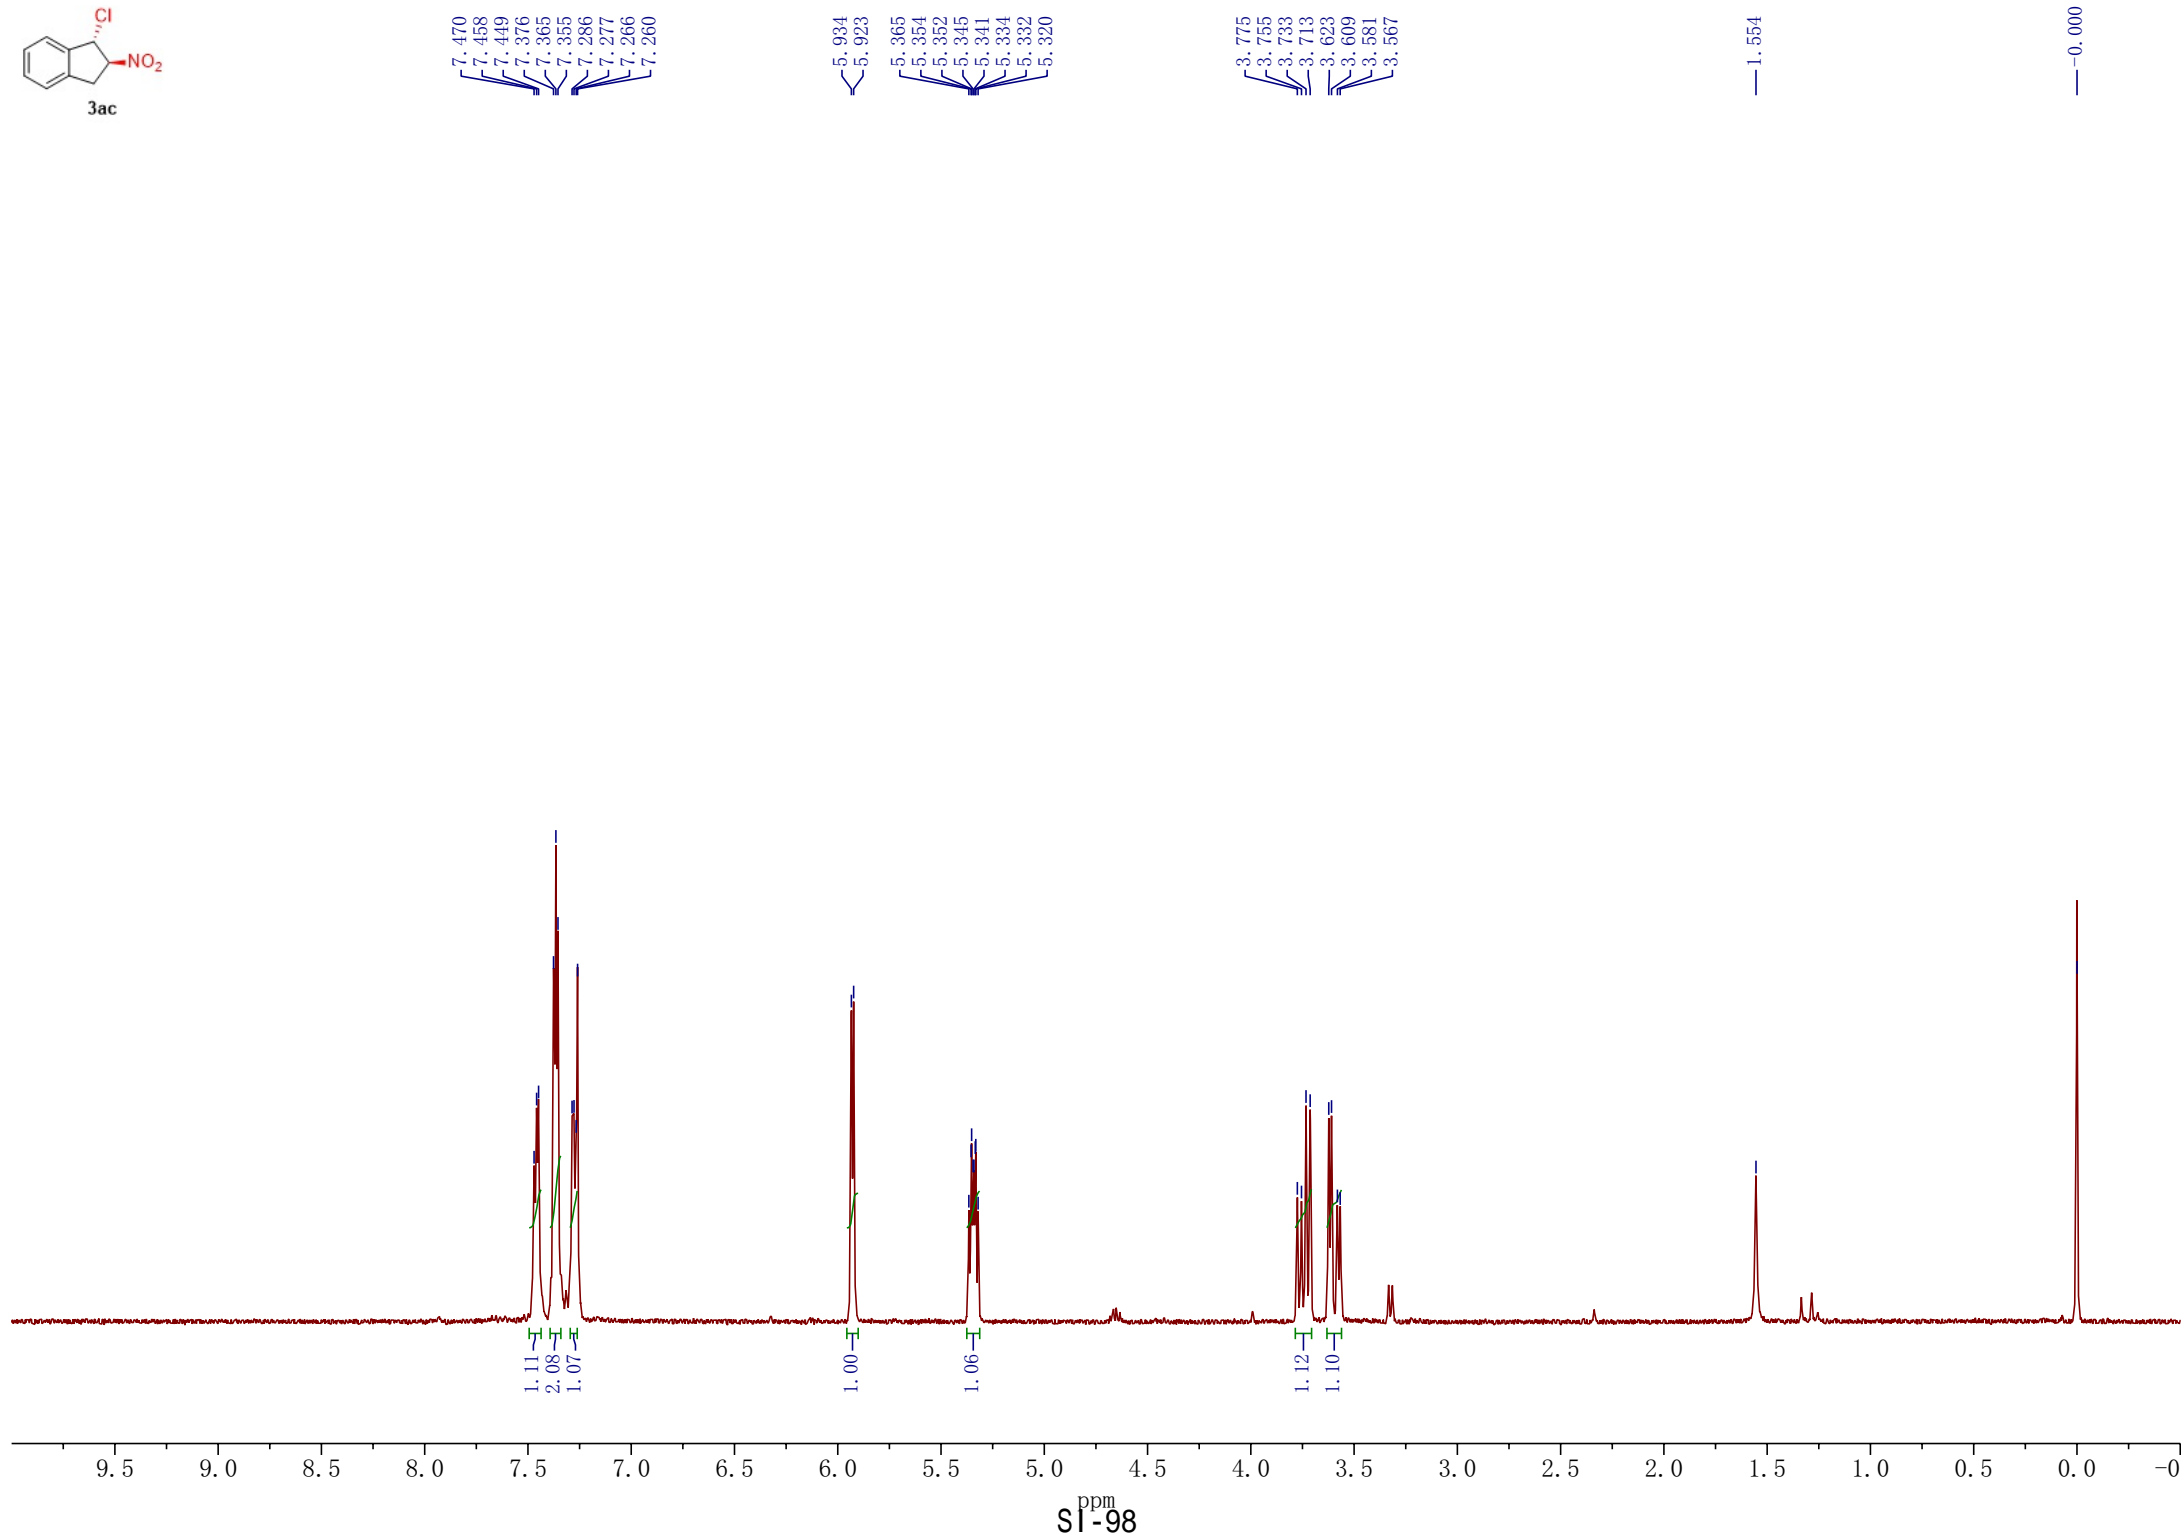

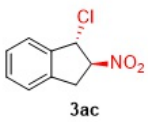

138.86  
137.71

130.27  
128.71  
125.46  
124.88

92.52

77.48  
77.16  
76.84

62.51

36.42

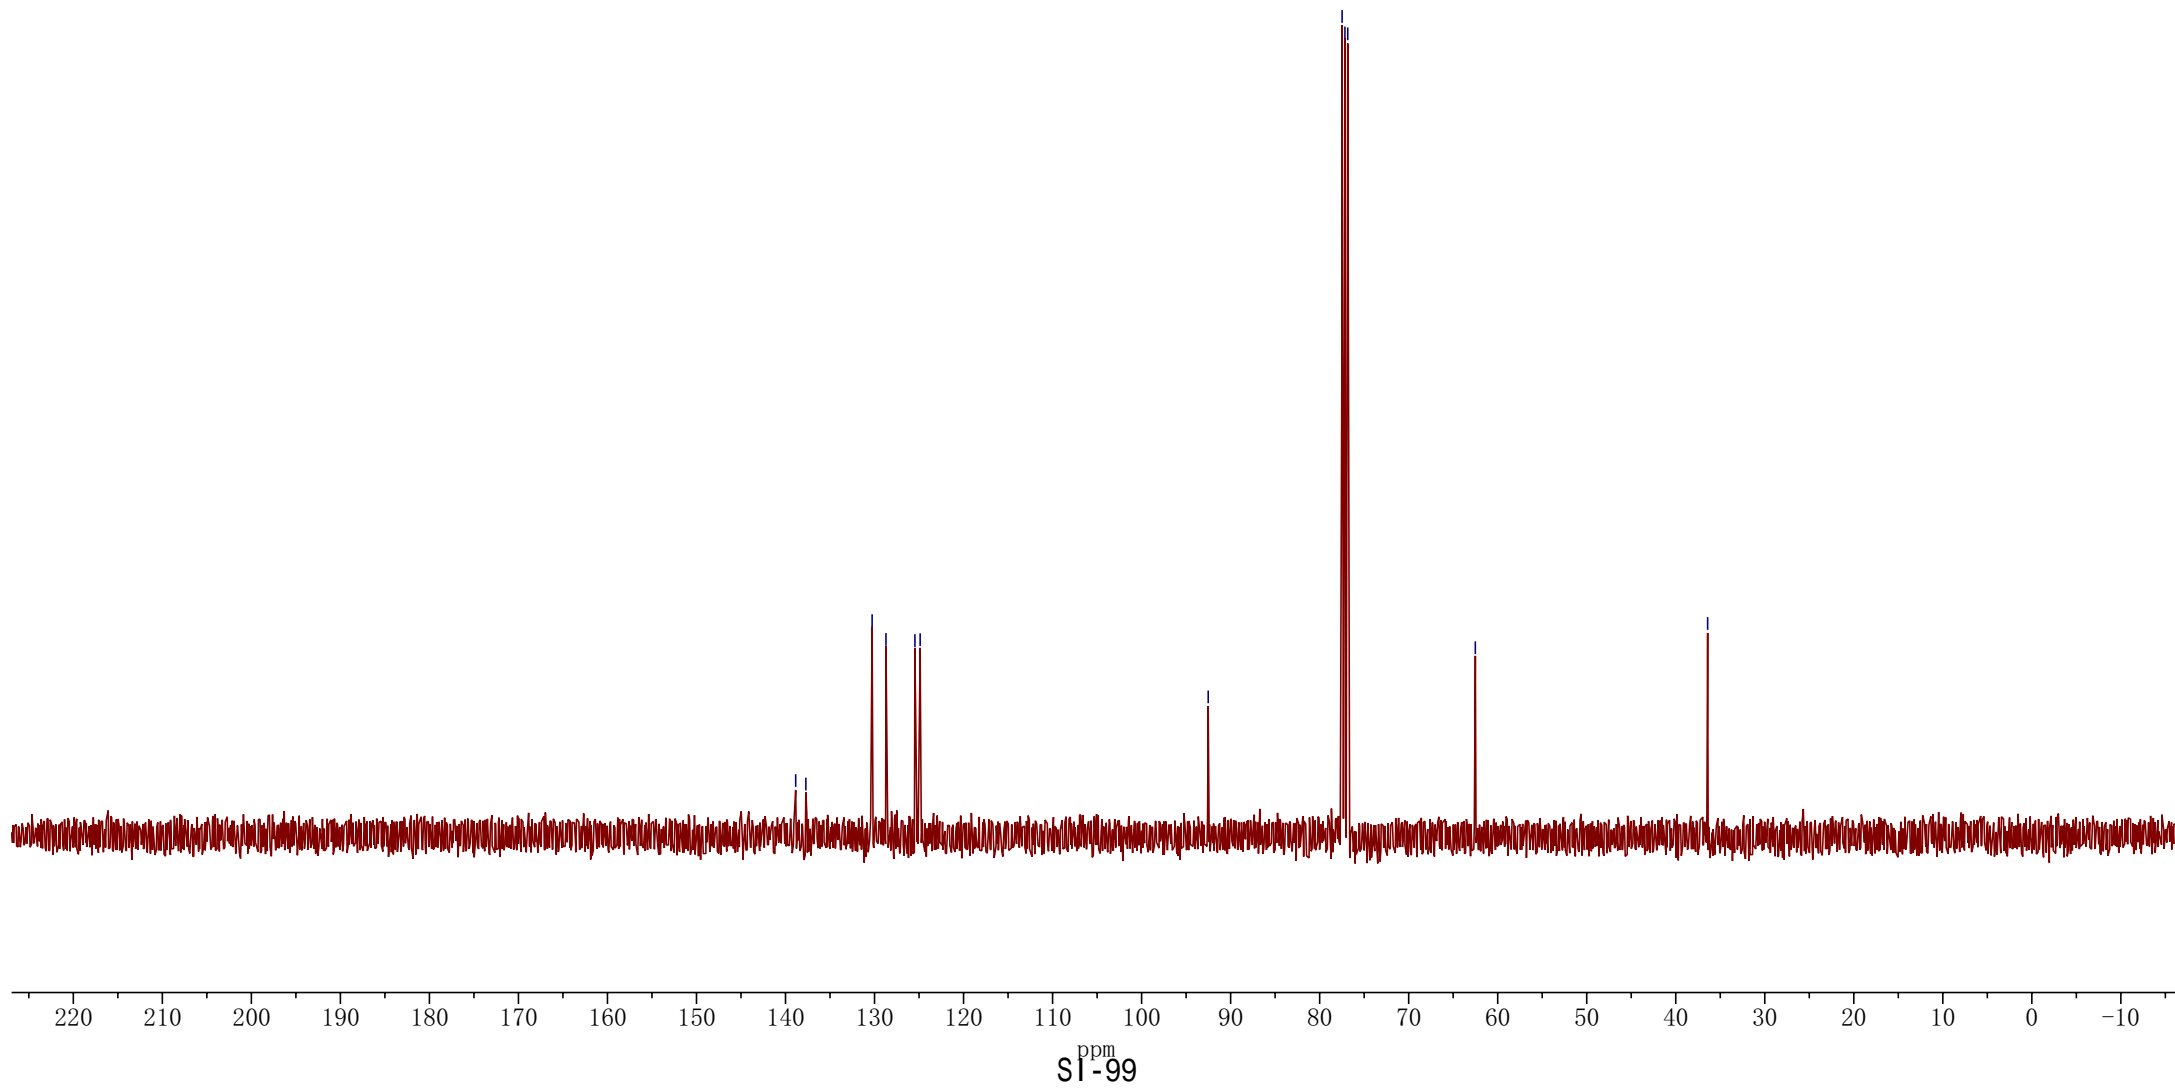

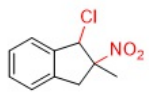

3ad (dr=1 : 0.3) major

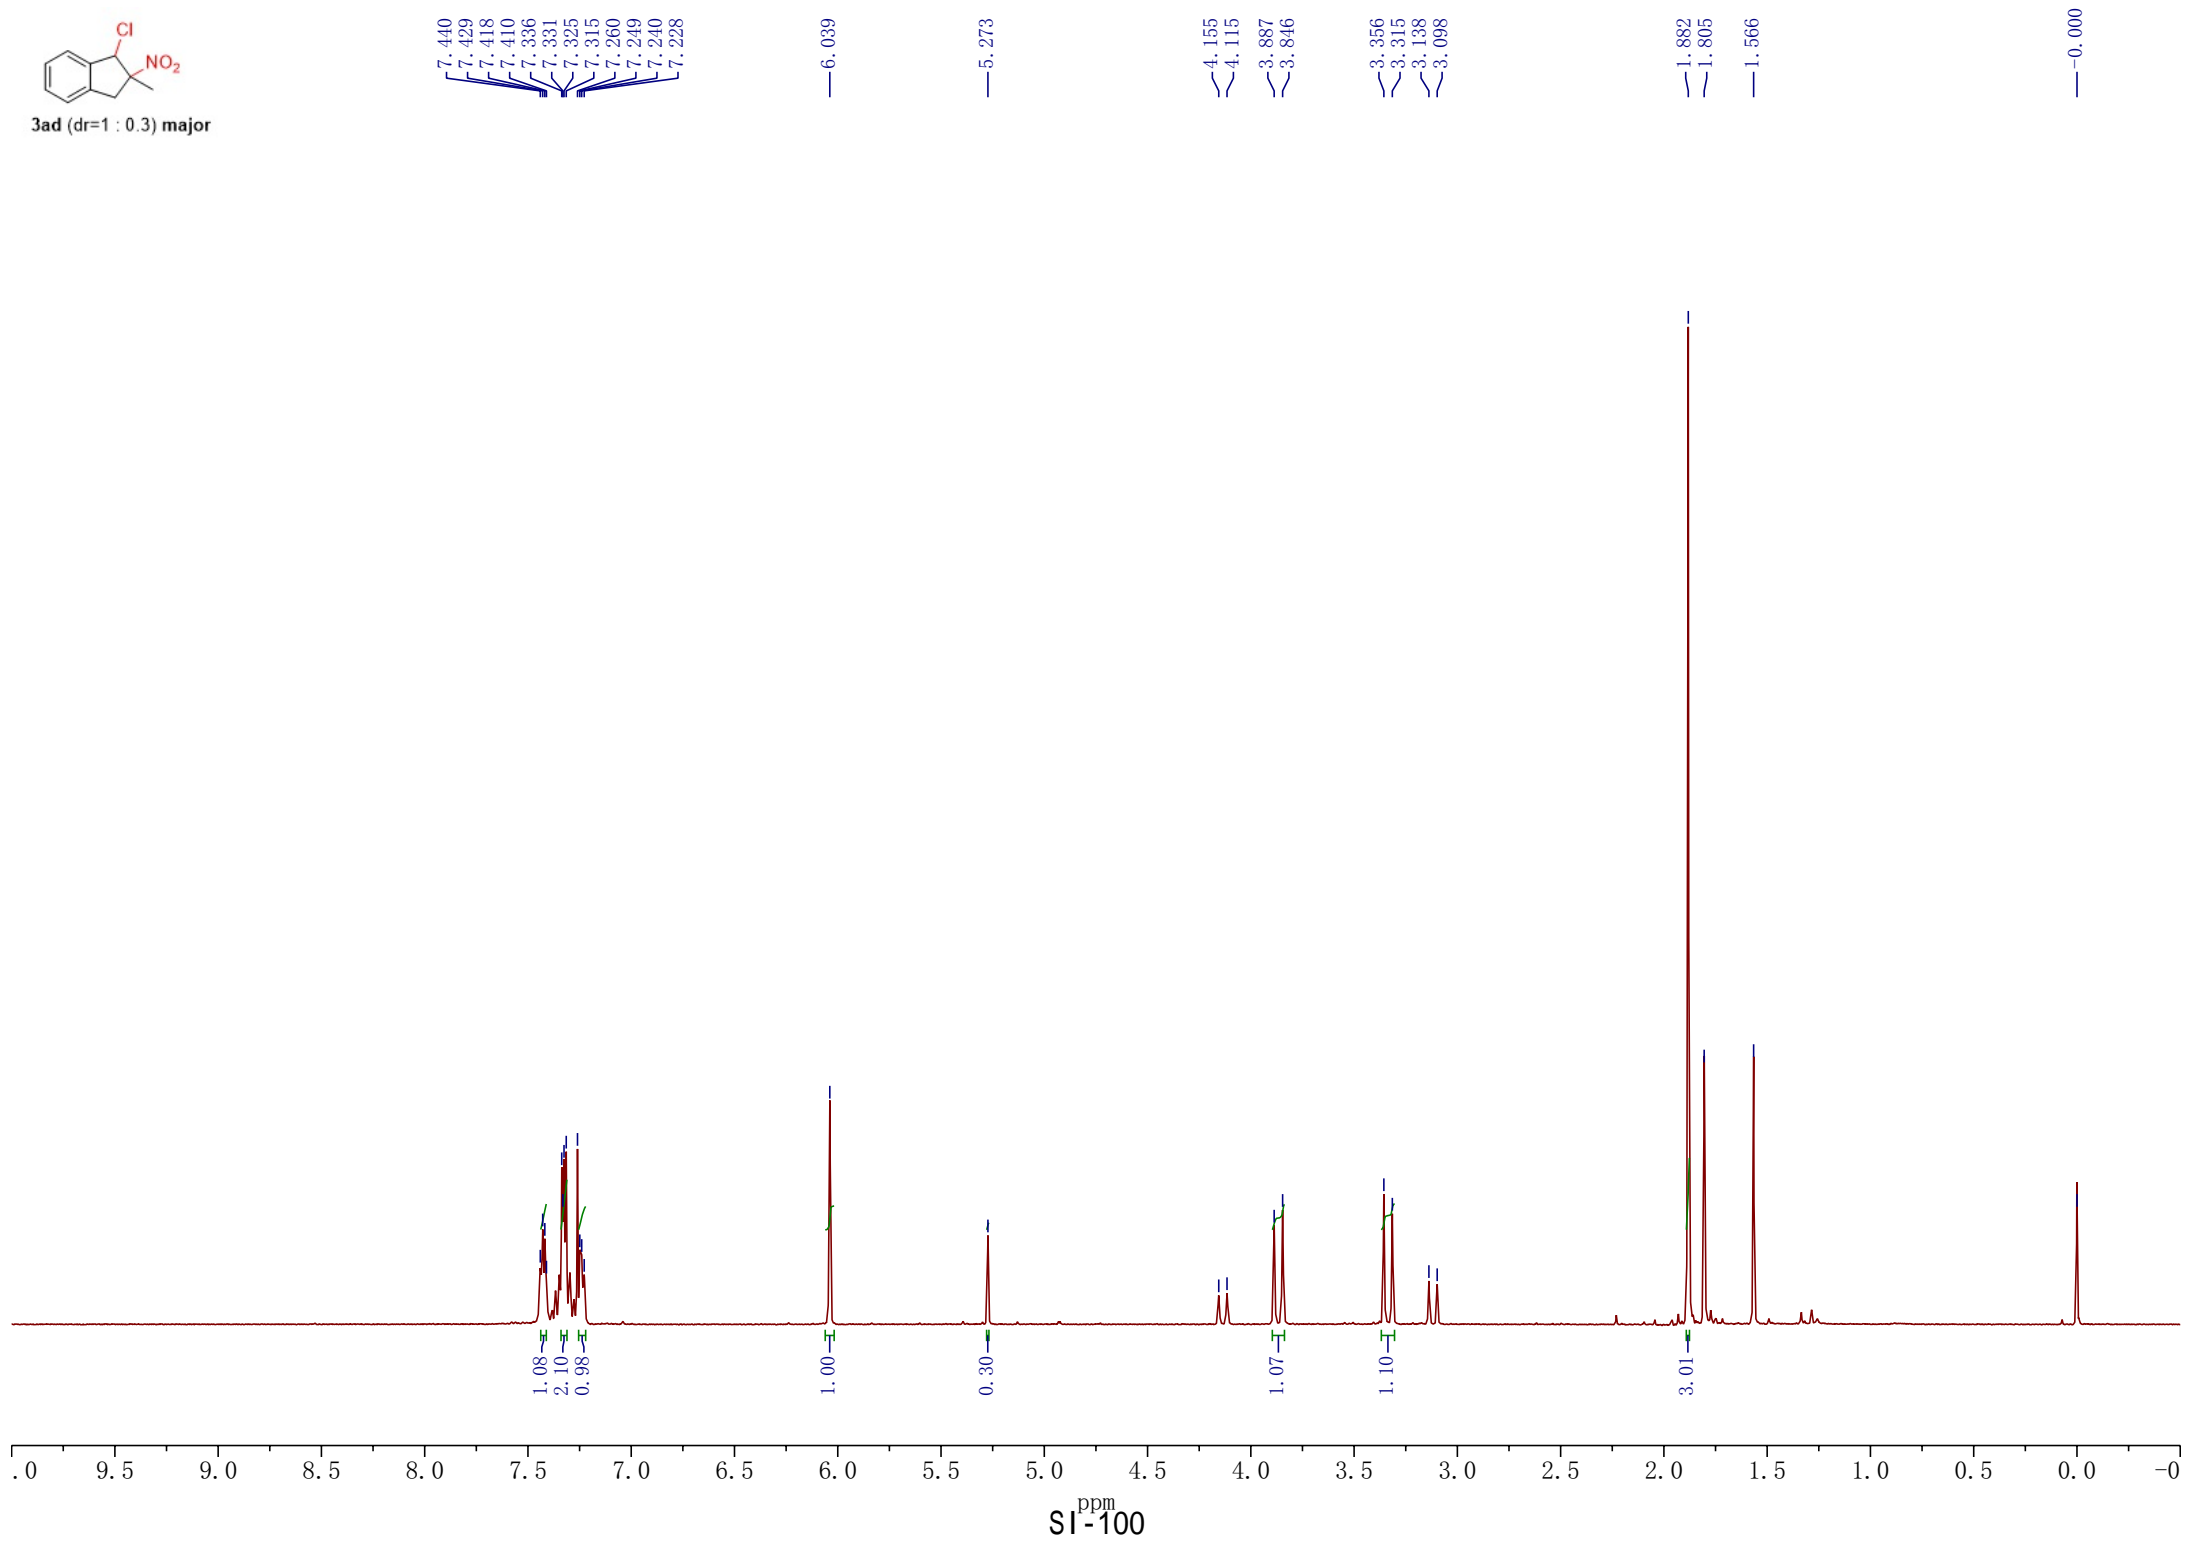

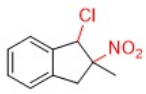

3ad (dr=1 : 0.3) major

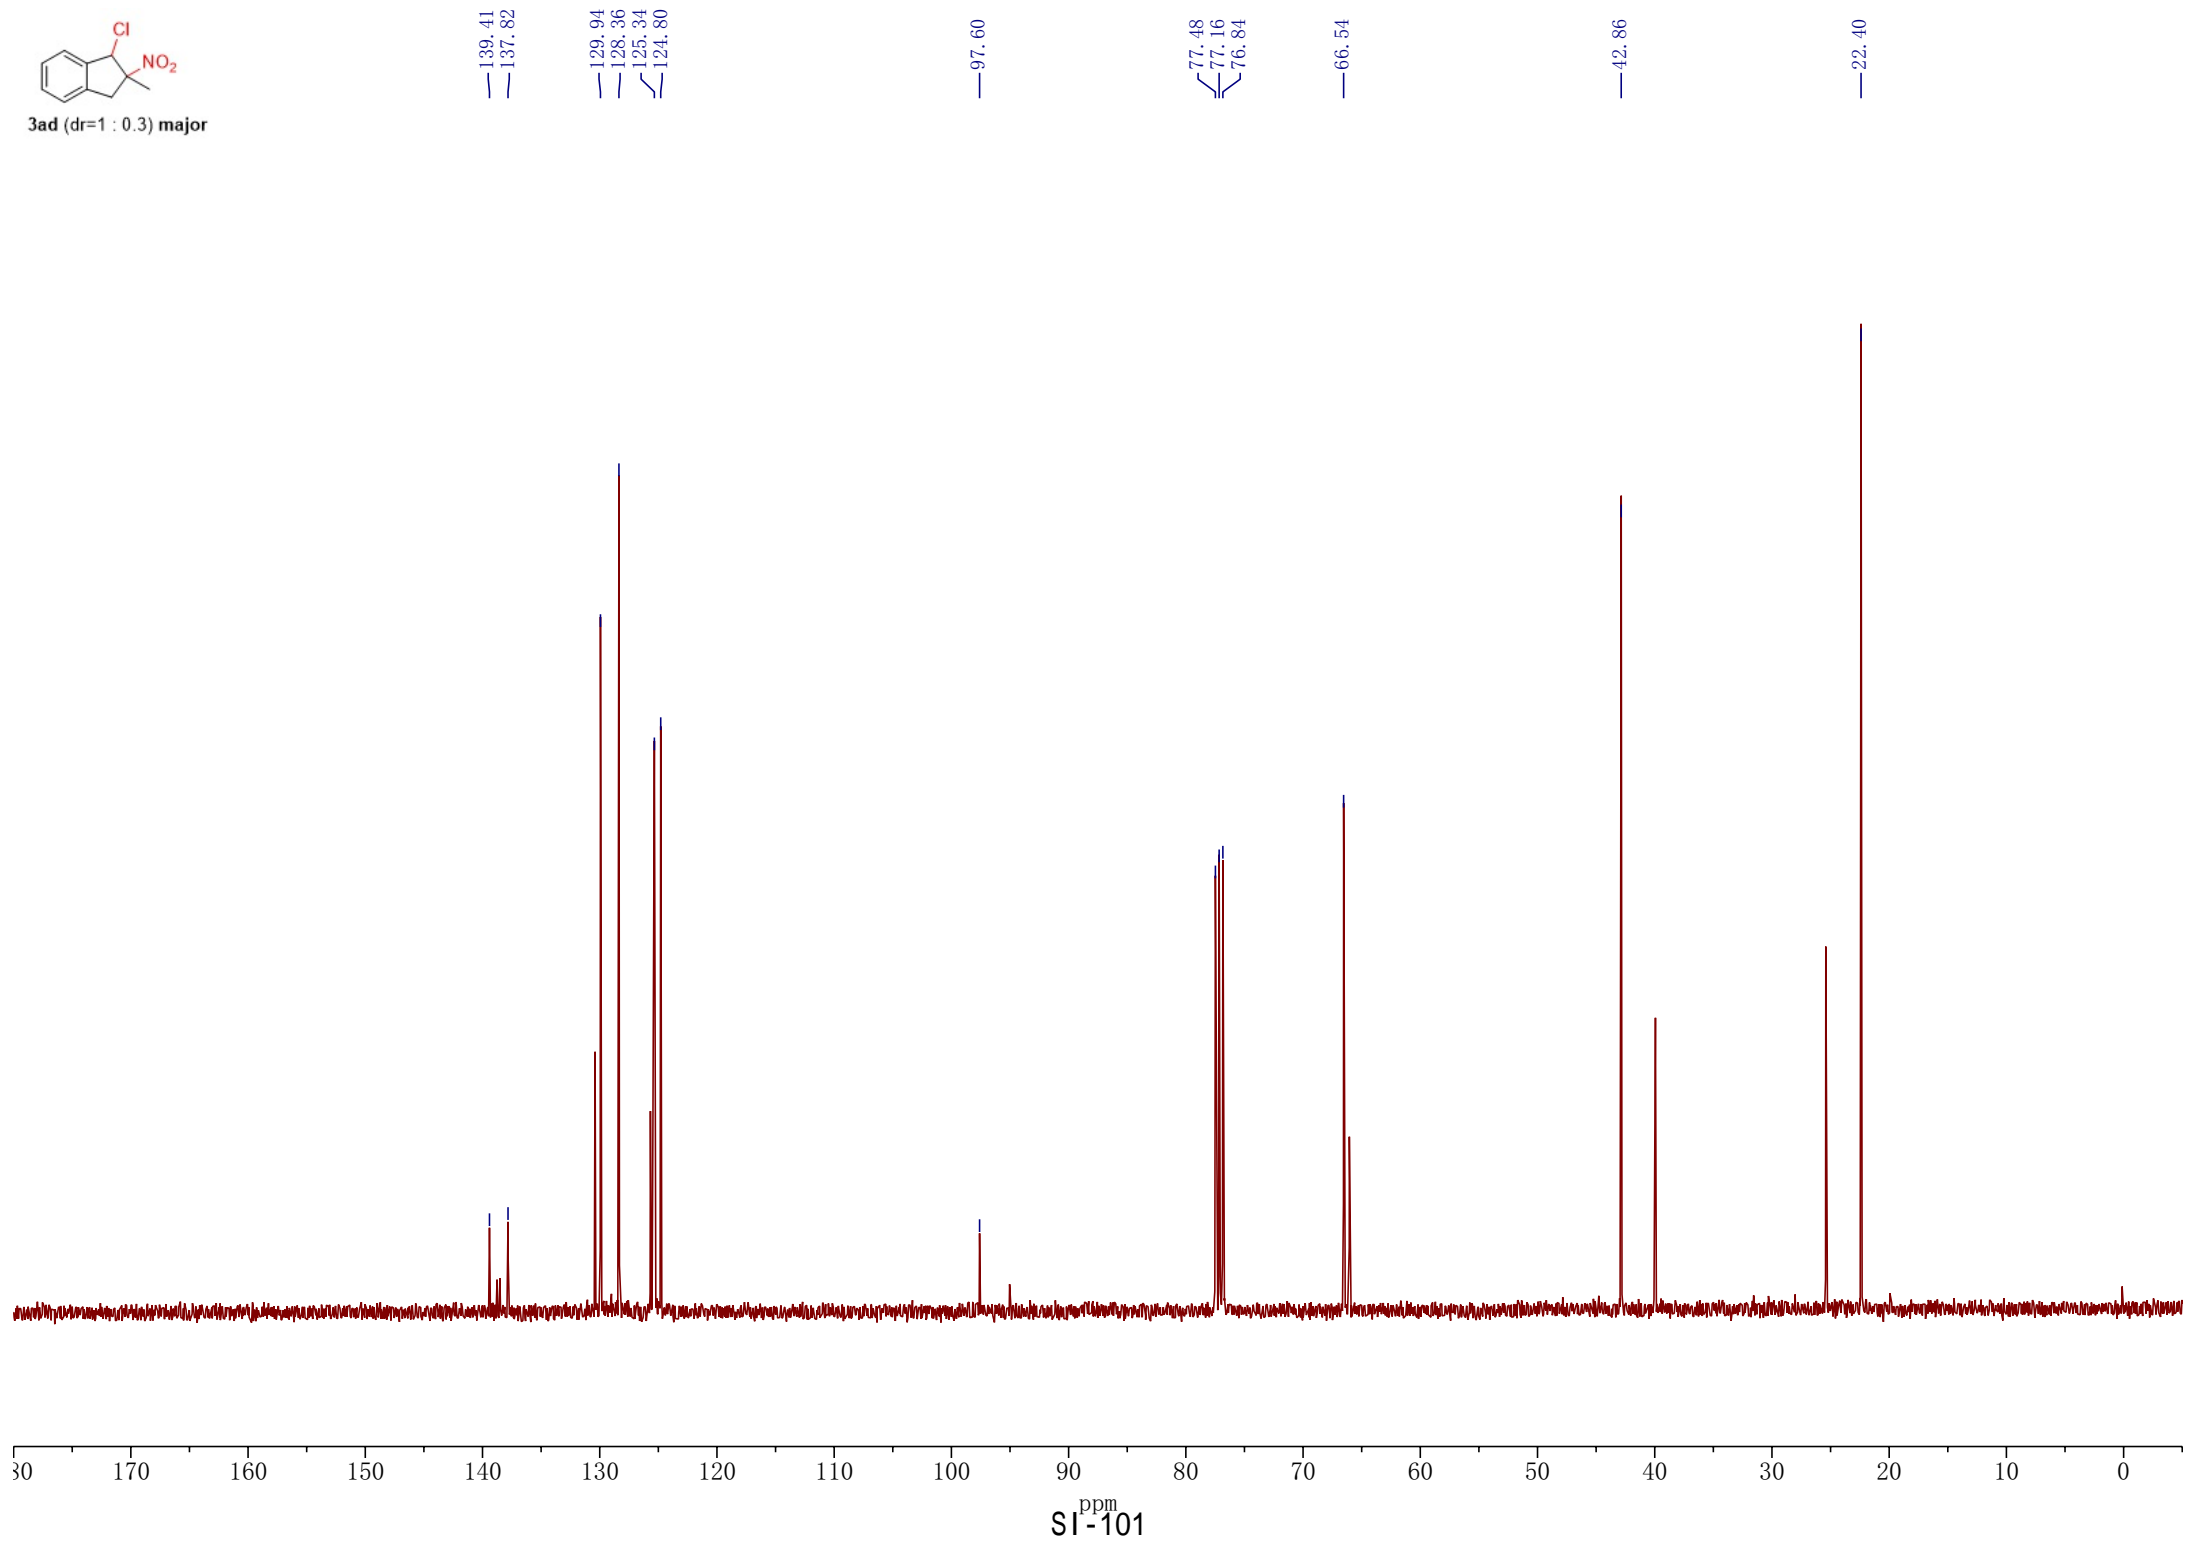

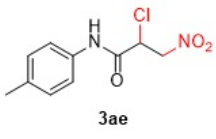

8.240

7.403  
7.382  
7.260  
7.180  
7.160

5.155  
5.145  
5.120  
5.110  
5.066  
5.055  
5.049  
5.039  
4.993  
4.976  
4.957  
4.940

2.337

0.000

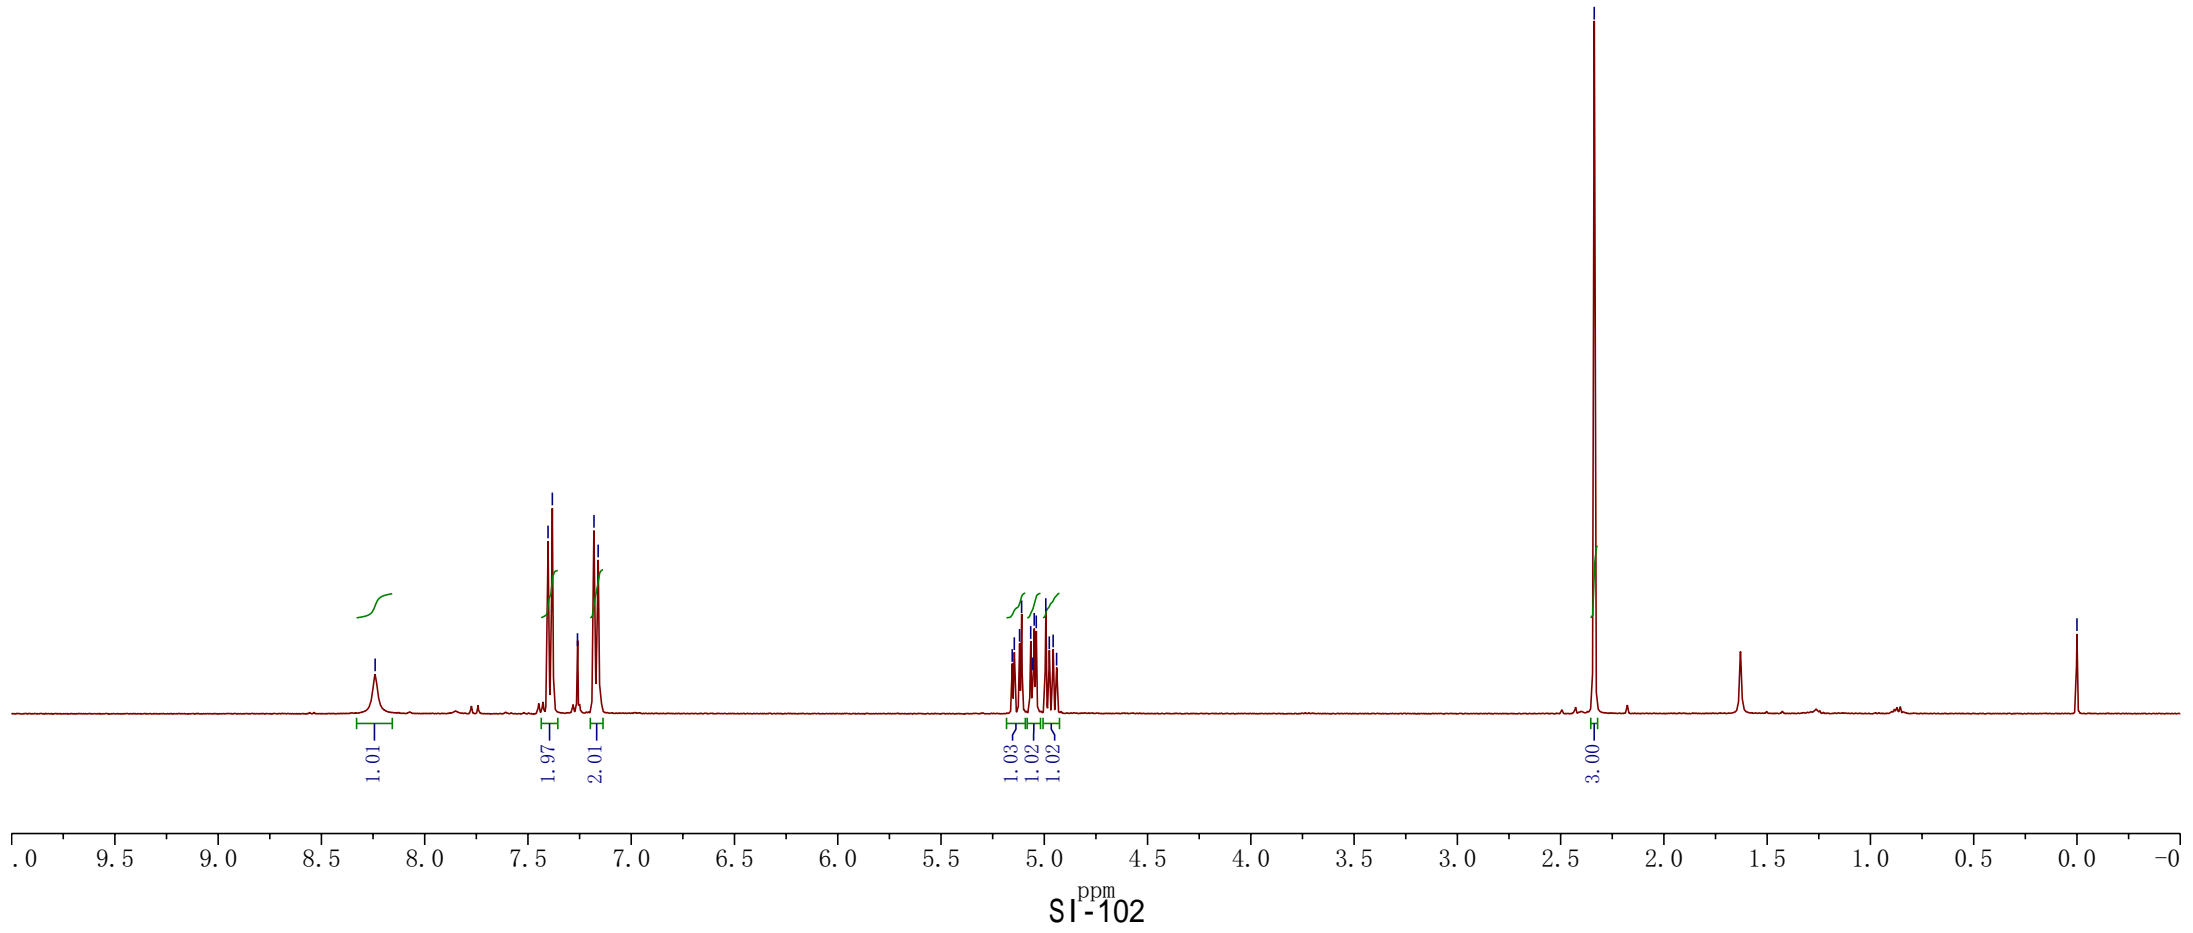



— 162.68

— 135.80  
— 133.76  
— 129.88

— 120.62

77.48  
77.16  
77.11  
76.84

— 54.10

— 21.07

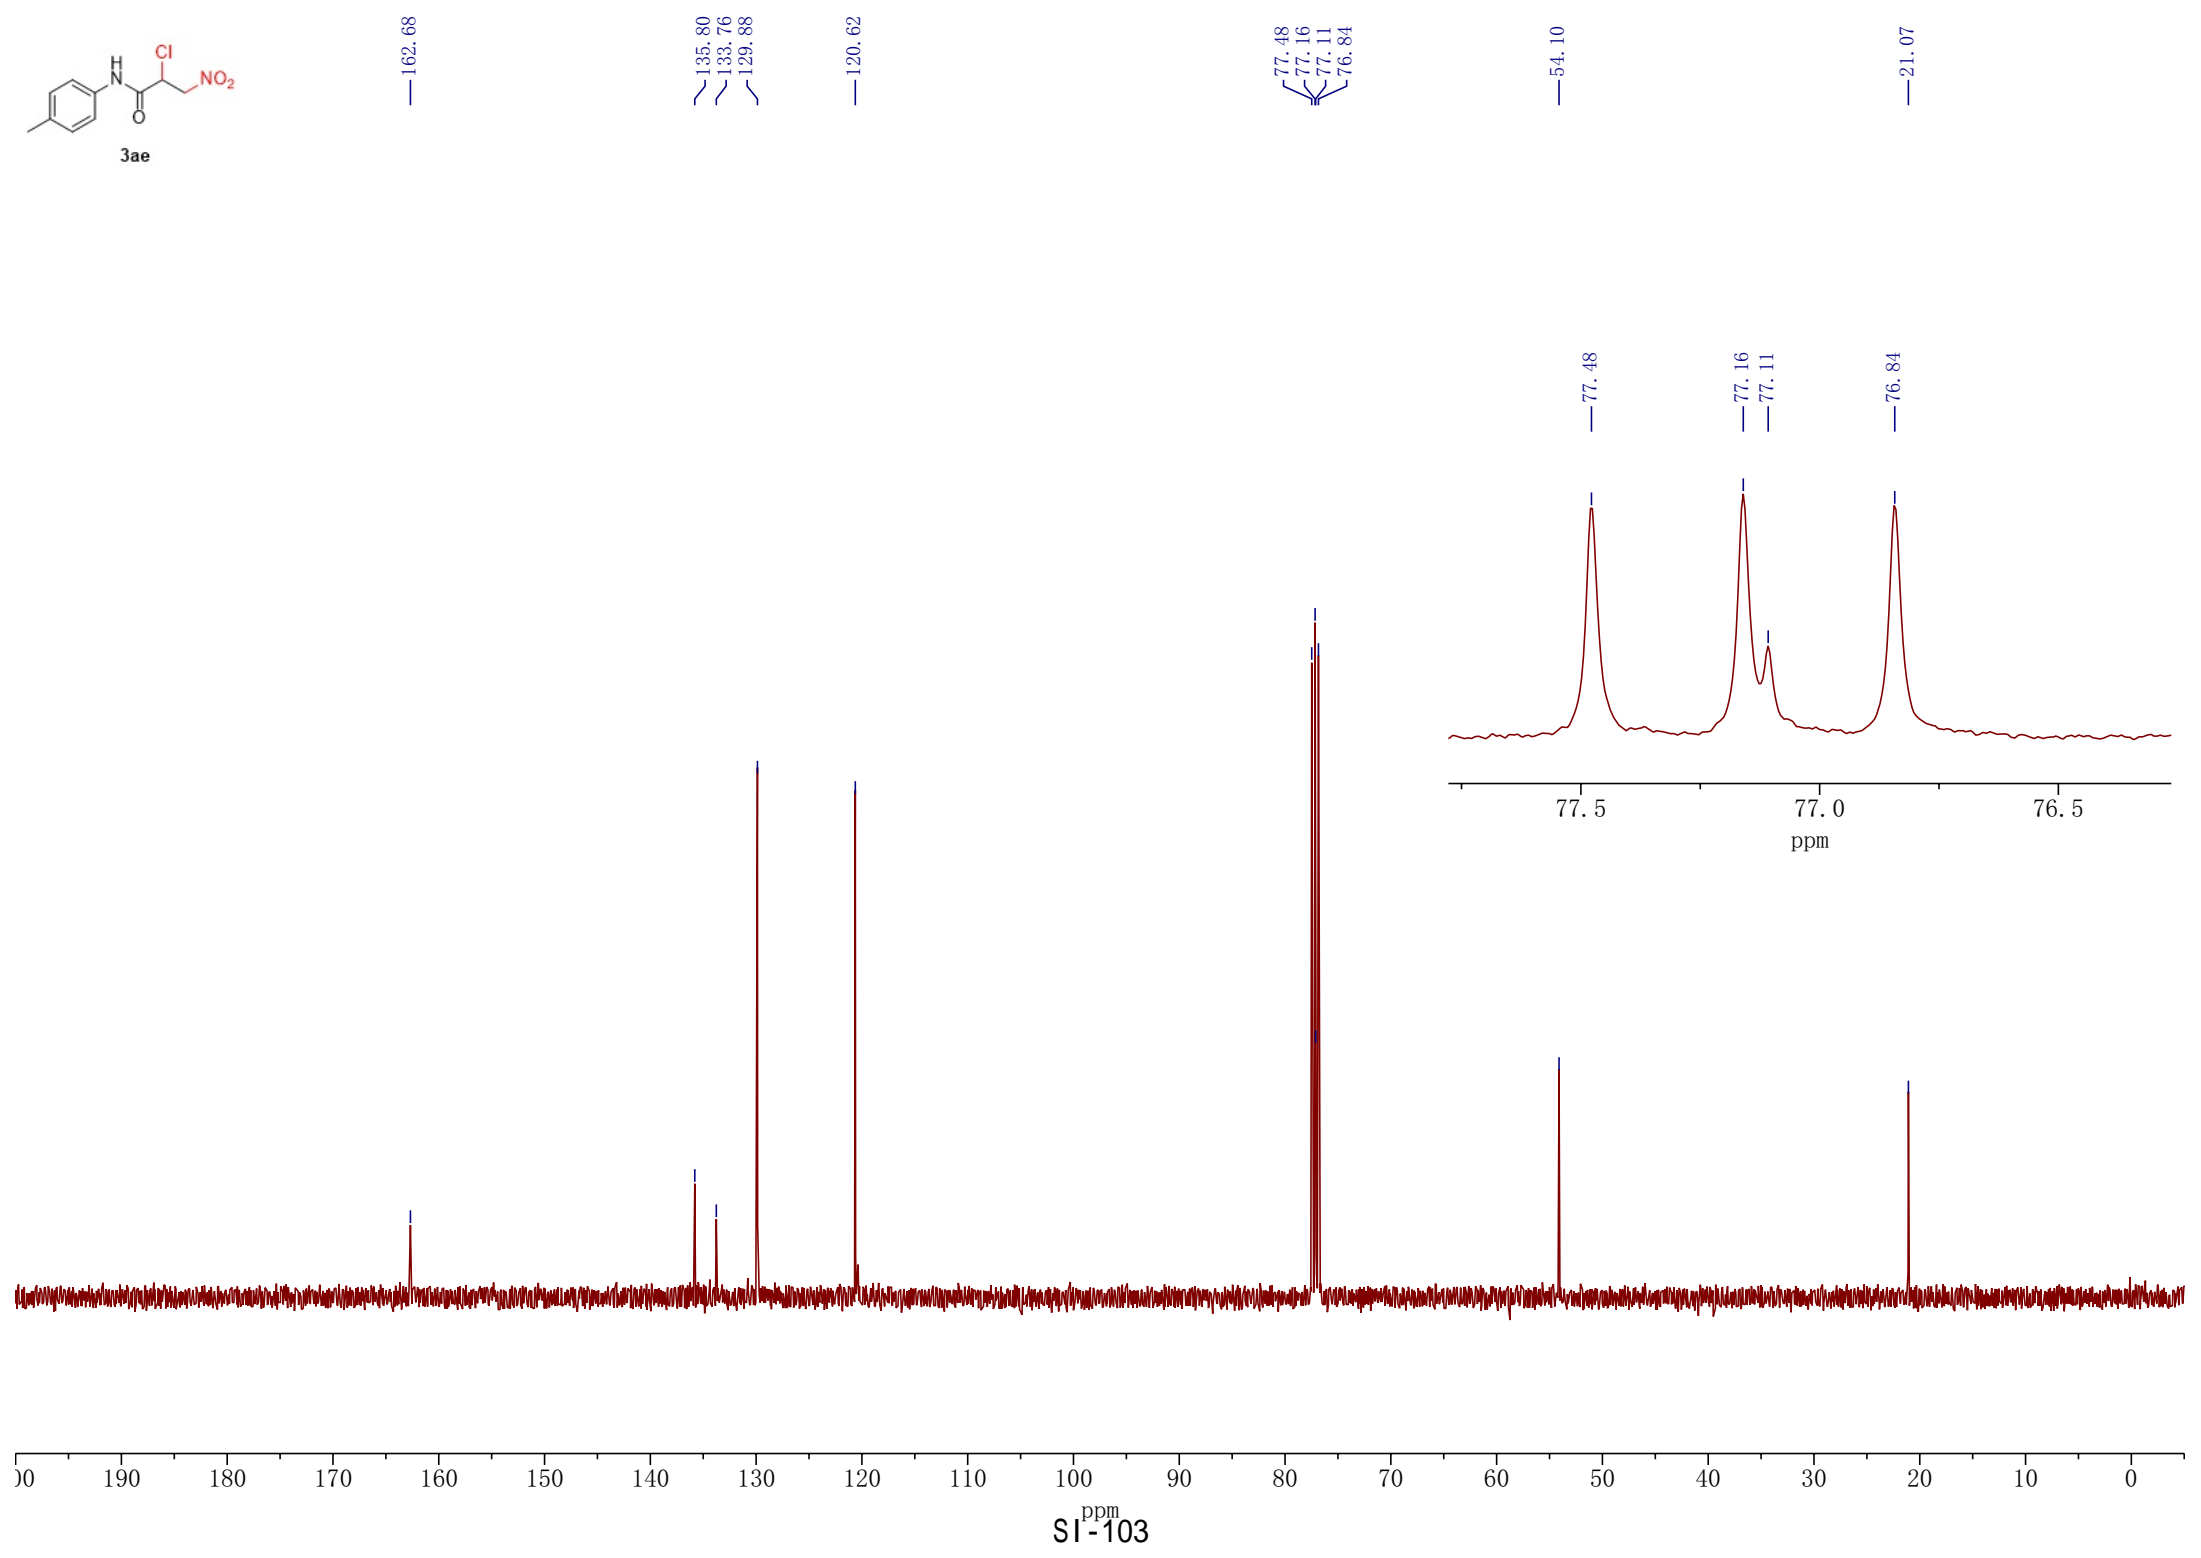

SI-103

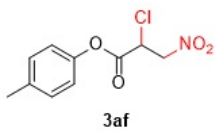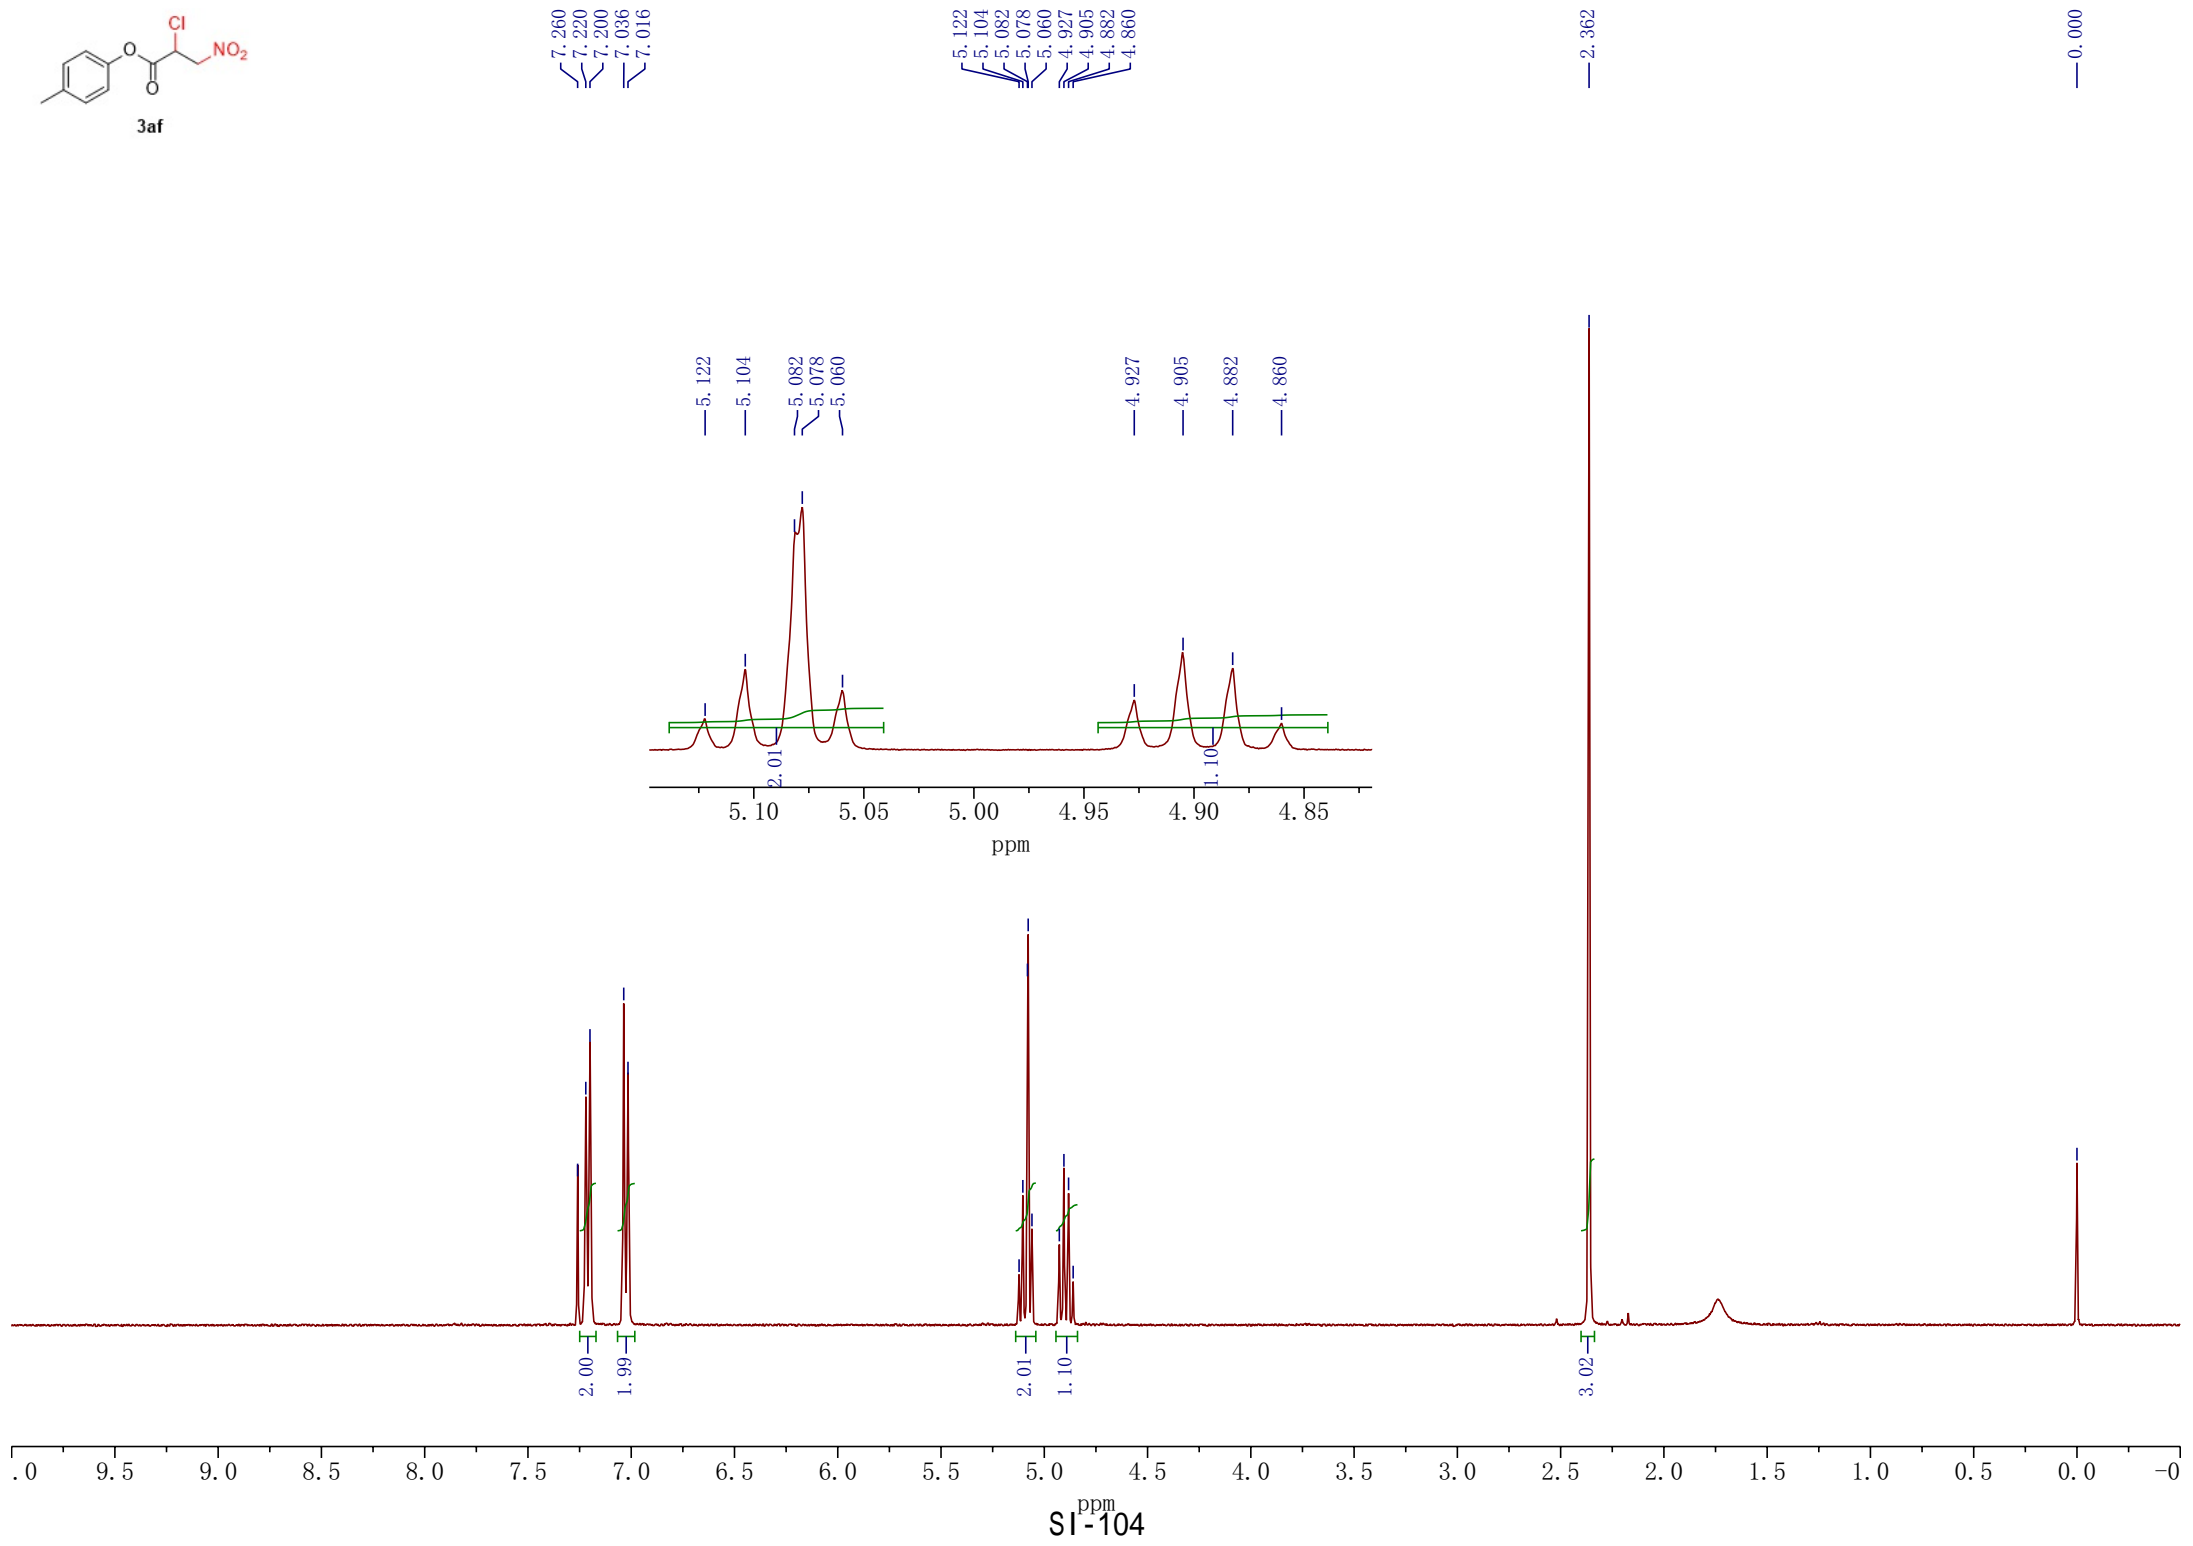





—165.41

—148.01

—136.77

—130.34

—120.66

77.48

77.16

76.84

75.55

—49.78

—21.05

190 180 170 160 150 140 130 120 110 100 90 80 70 60 50 40 30 20 10 0

ppm  
SI-105

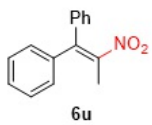

7.398  
7.393  
7.384  
7.382  
7.367  
7.354  
7.350  
7.313  
7.310  
7.307  
7.304  
7.301  
7.297  
7.260  
7.216  
7.211  
7.210  
7.196  
7.192  
7.162  
7.158  
7.154  
7.151  
7.148  
7.145  
7.141  
7.138

7.398  
7.393  
7.384  
7.382  
7.367  
7.354  
7.350  
7.313  
7.310  
7.307  
7.304  
7.301  
7.297  
7.260  
7.216  
7.211  
7.210  
7.196  
7.192  
7.162  
7.158  
7.154  
7.151  
7.148  
7.145  
7.141  
7.138

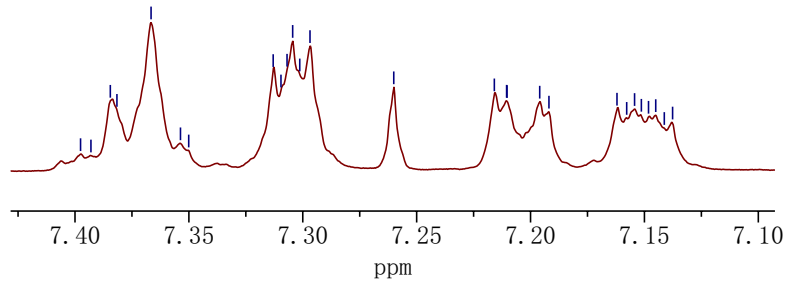

2.347

1.553

0.000

2.94  
2.94  
1.93  
1.97

3.00

SI-106

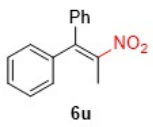

146.46

140.00

138.42

138.30

129.52

128.86

128.71

128.70

128.67

128.26

77.48

77.16

76.84

18.27

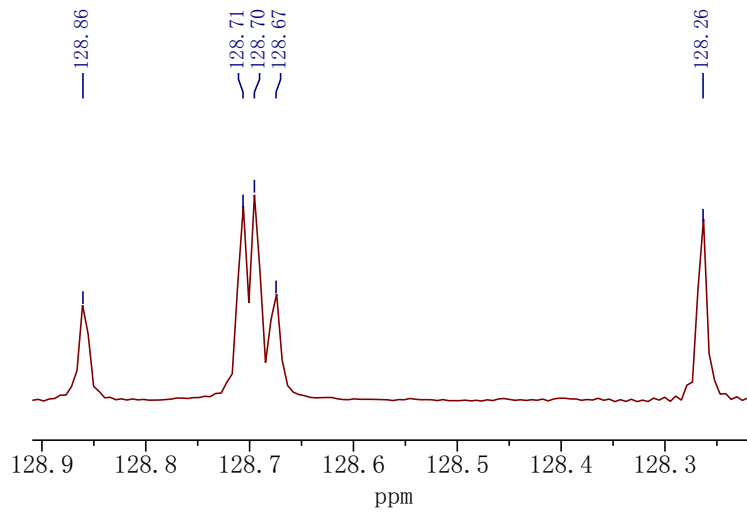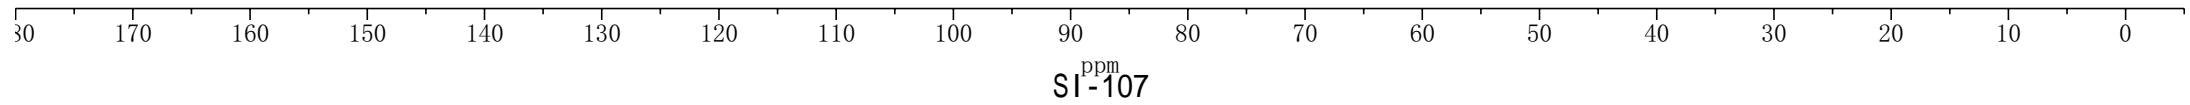

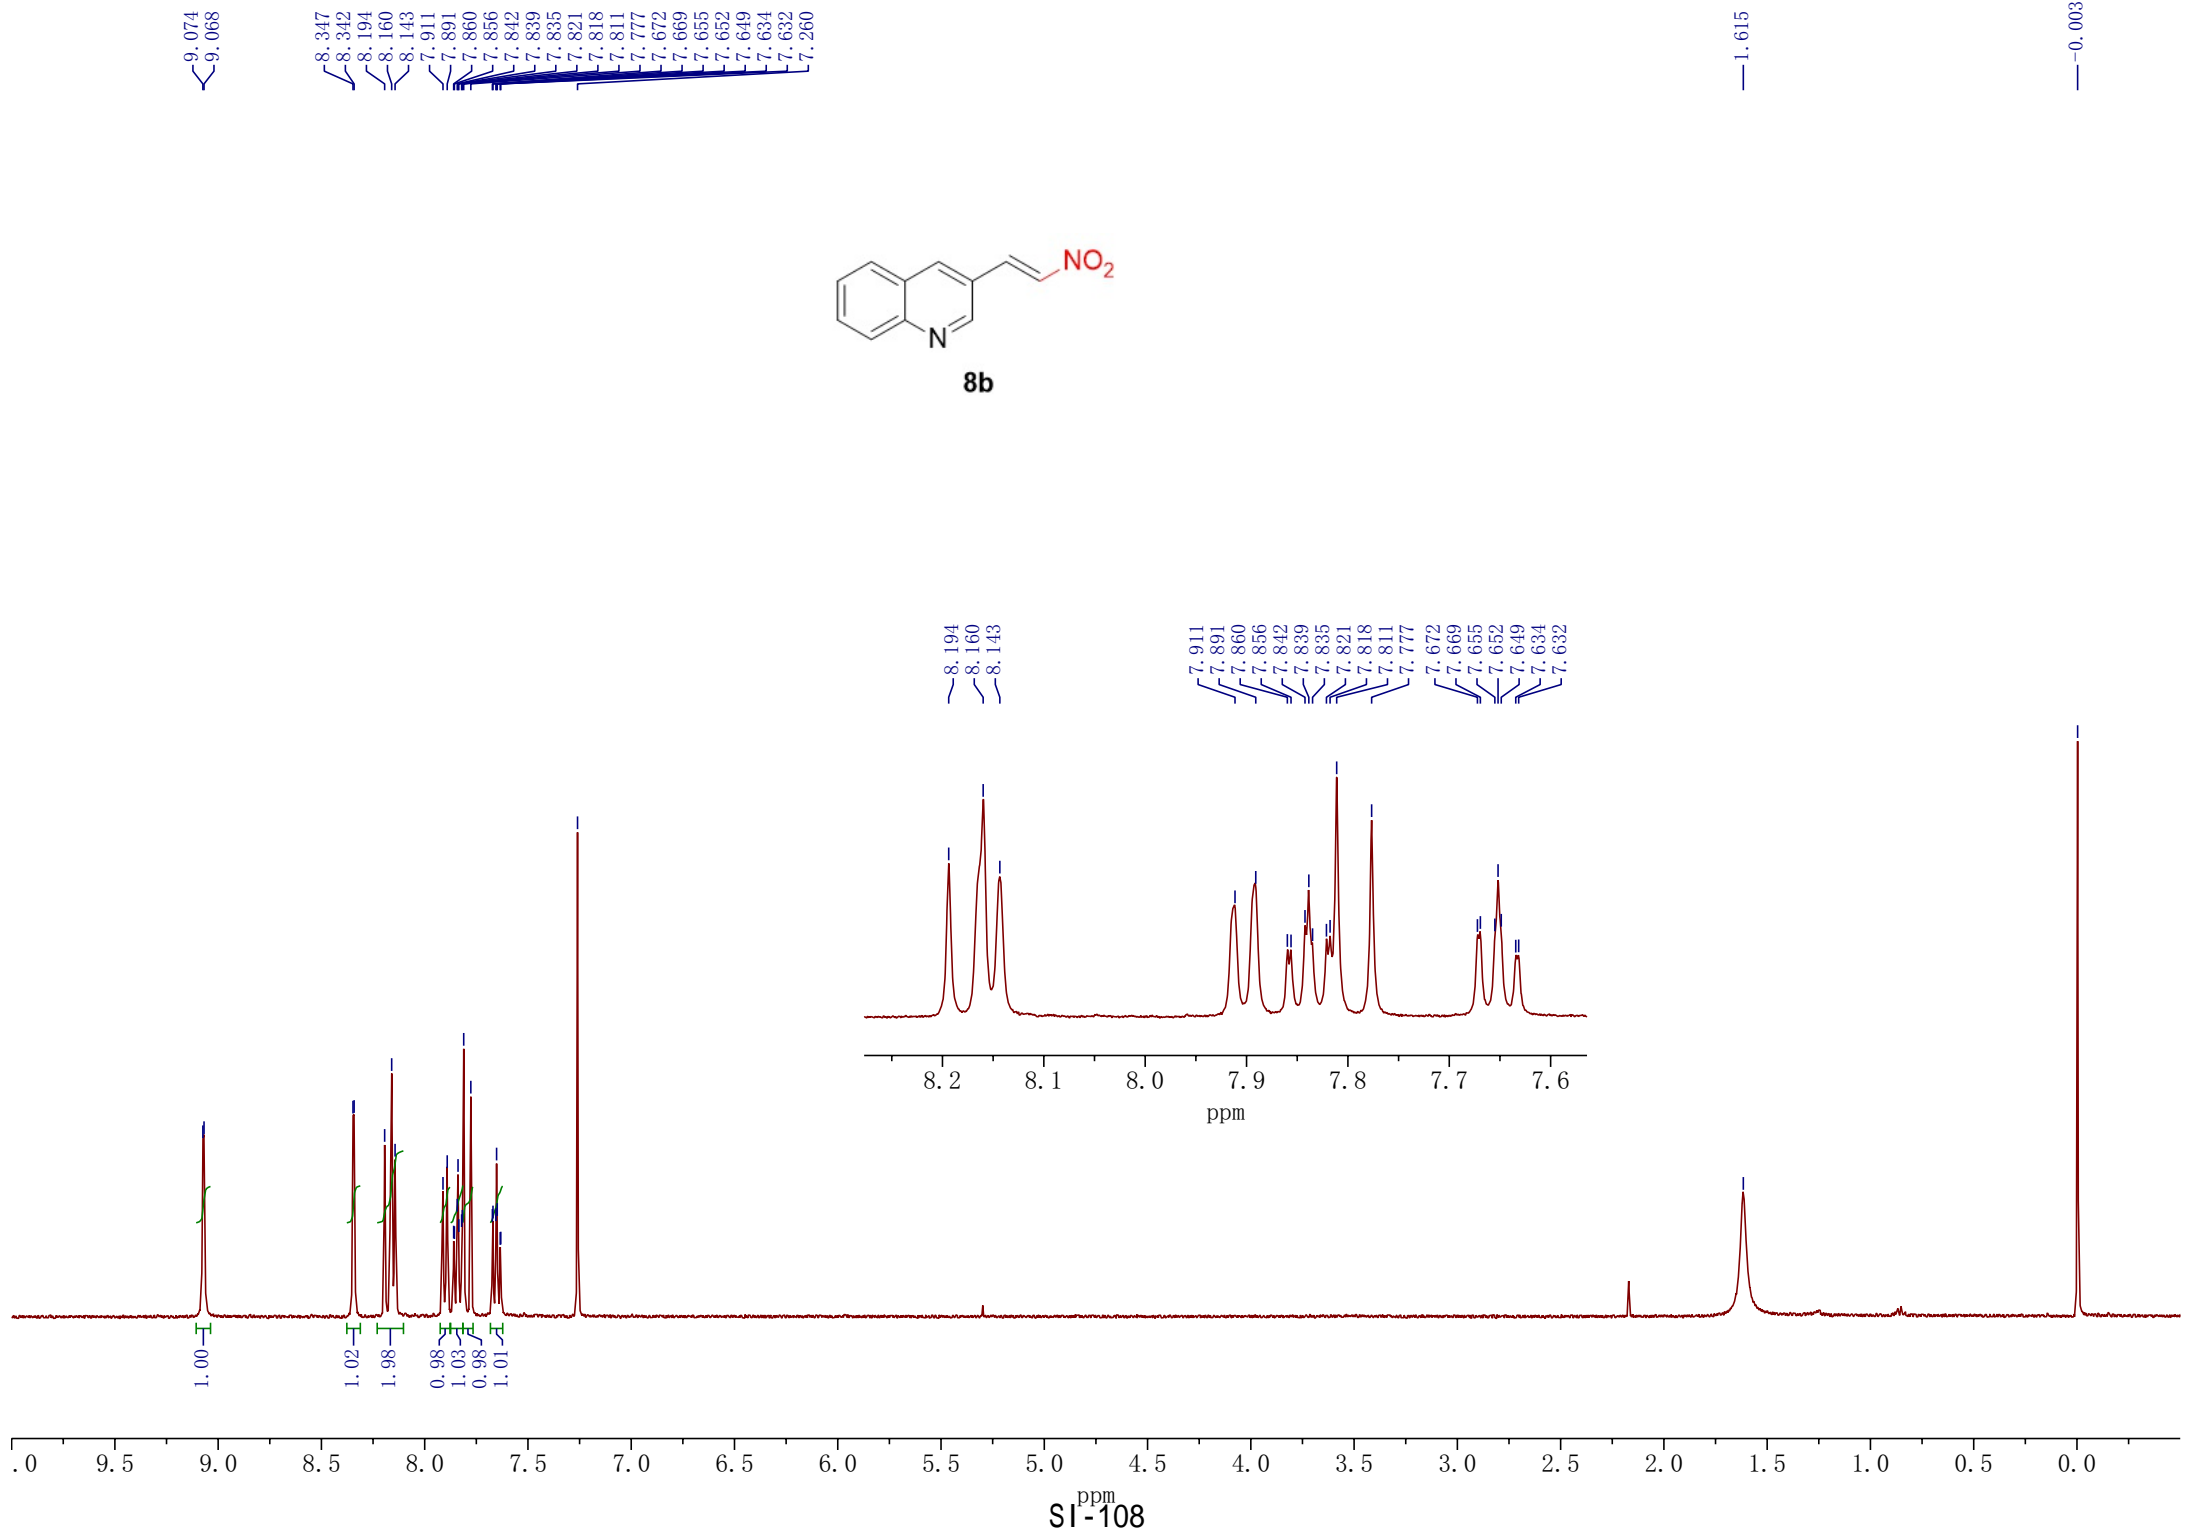

149.38  
148.93  
138.23  
137.59  
135.91  
131.94  
129.80  
128.69  
128.17  
127.53  
123.43

77.48  
77.16  
76.84

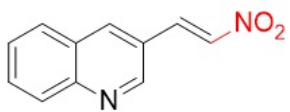

**8b**

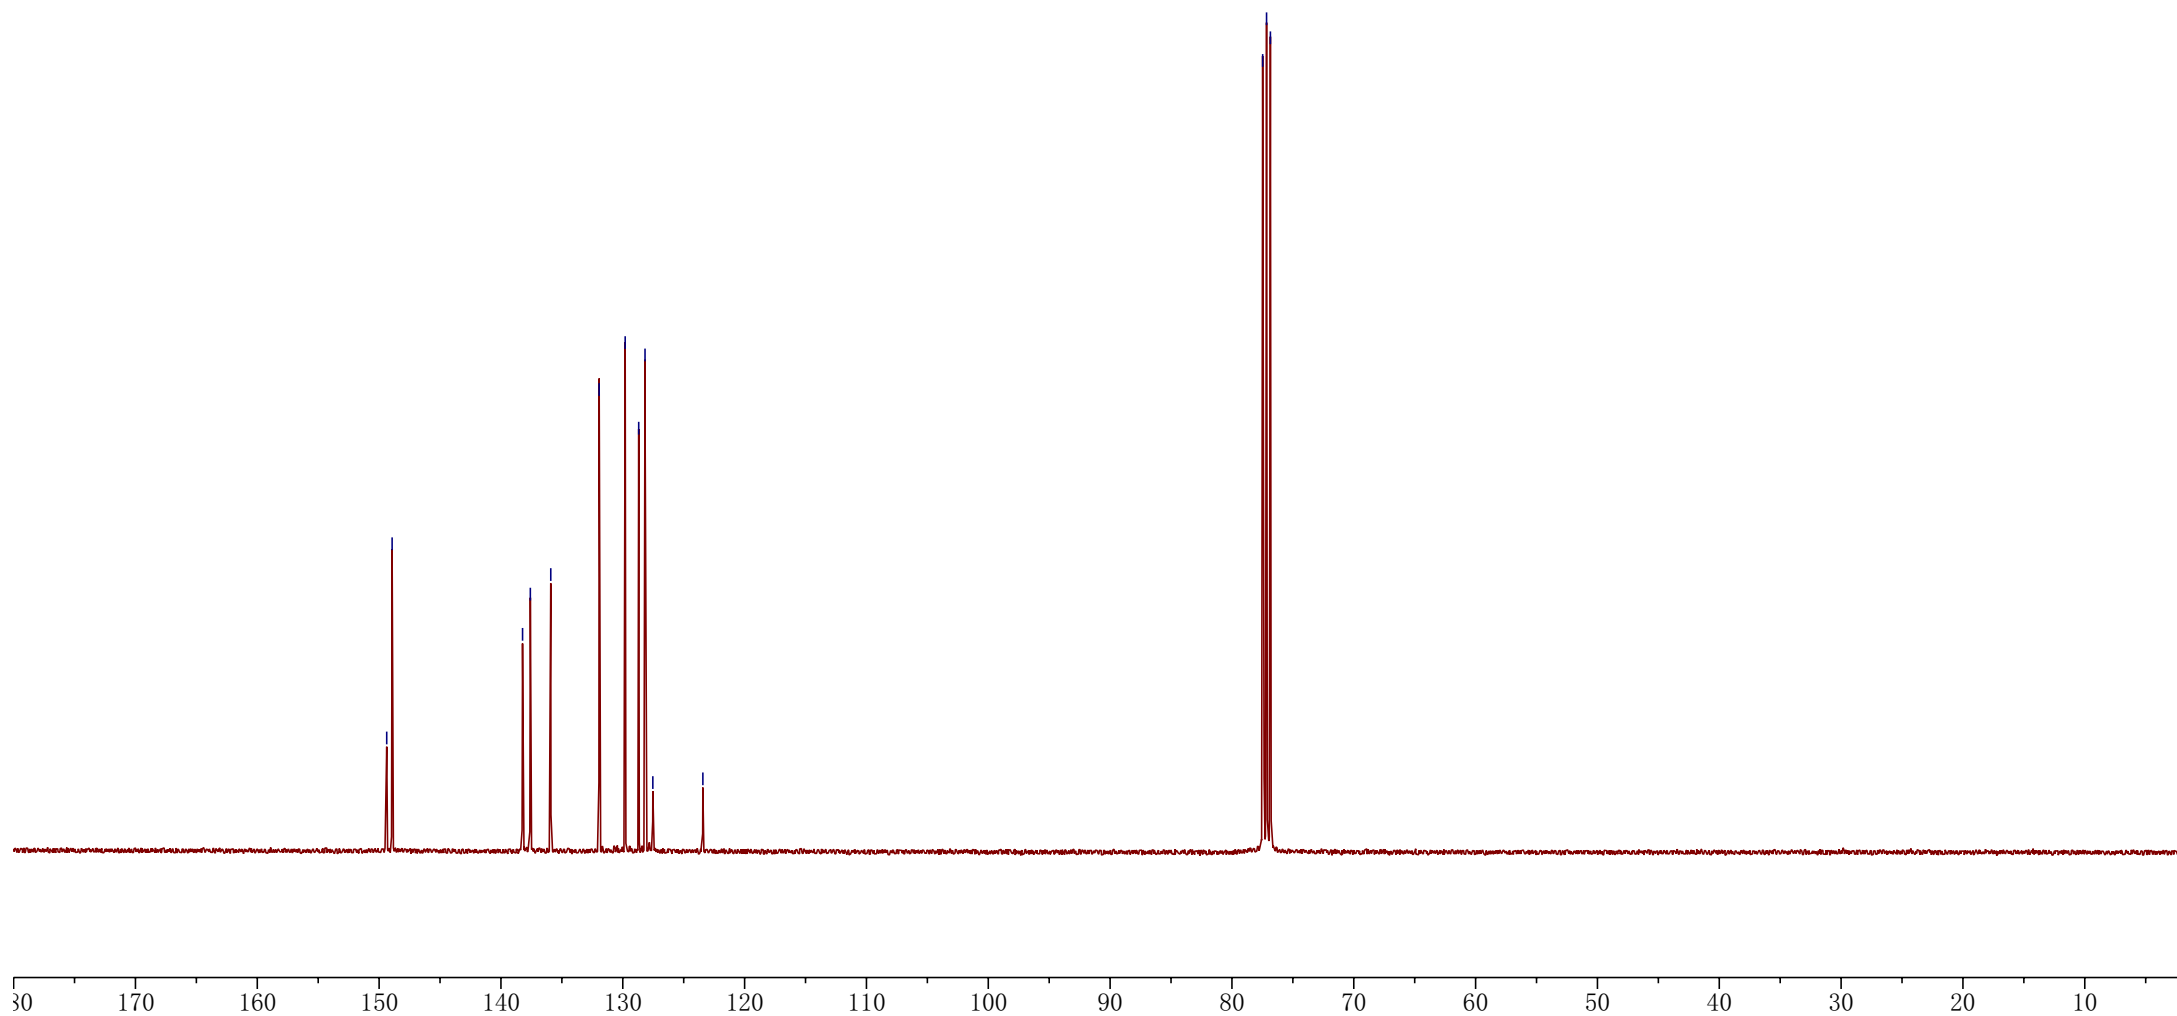

ppm  
SI-109

9.036  
9.026  
8.776  
8.742  
8.509  
8.488  
8.295  
8.274  
7.862  
7.844  
7.803  
7.783  
7.764  
7.693  
7.660  
7.592  
7.582  
7.571  
7.560  
7.260

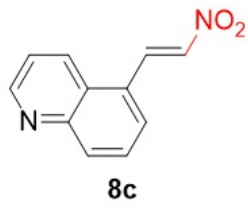

1.693

-0.000

7.862  
7.844  
7.803  
7.783  
7.764  
7.693  
7.660  
7.592  
7.582  
7.571  
7.560

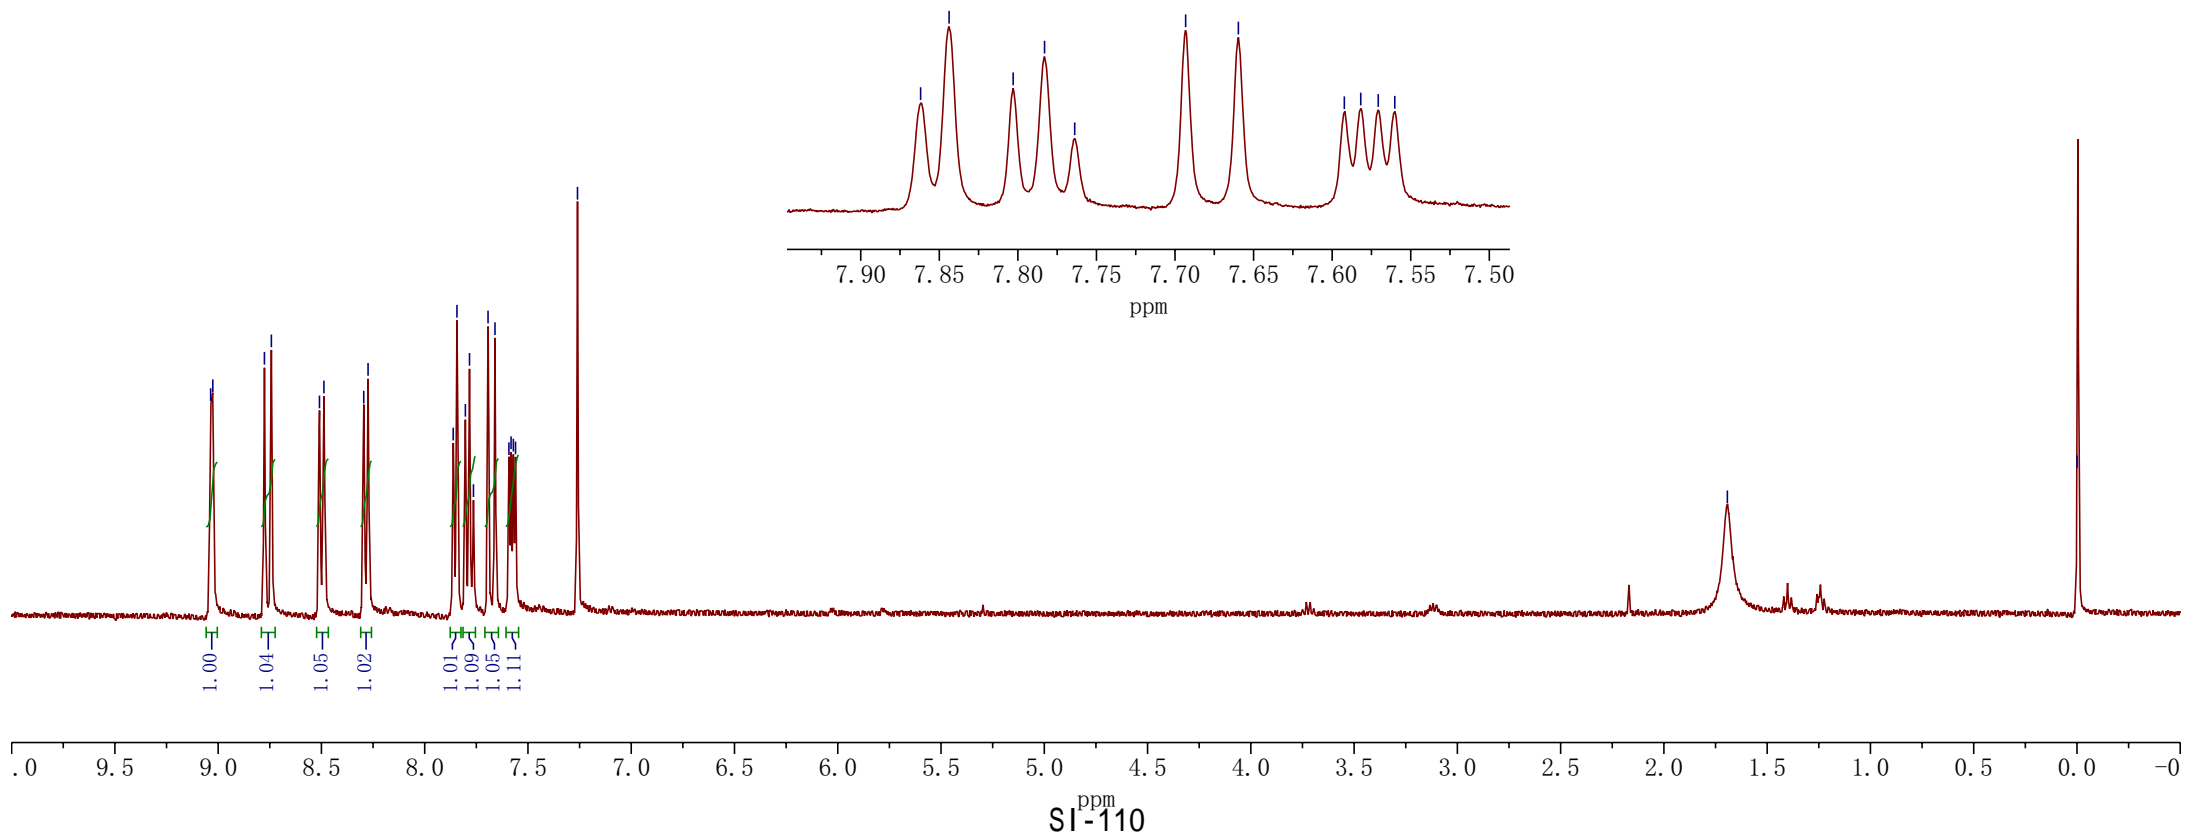

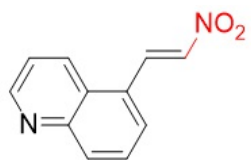

**8c**

— 151.34  
— 148.59

— 139.40  
— 134.56  
— 133.95  
— 131.46  
— 129.18  
— 127.48  
— 127.08  
— 126.81  
— 122.43

— 77.48  
— 77.16  
— 76.84

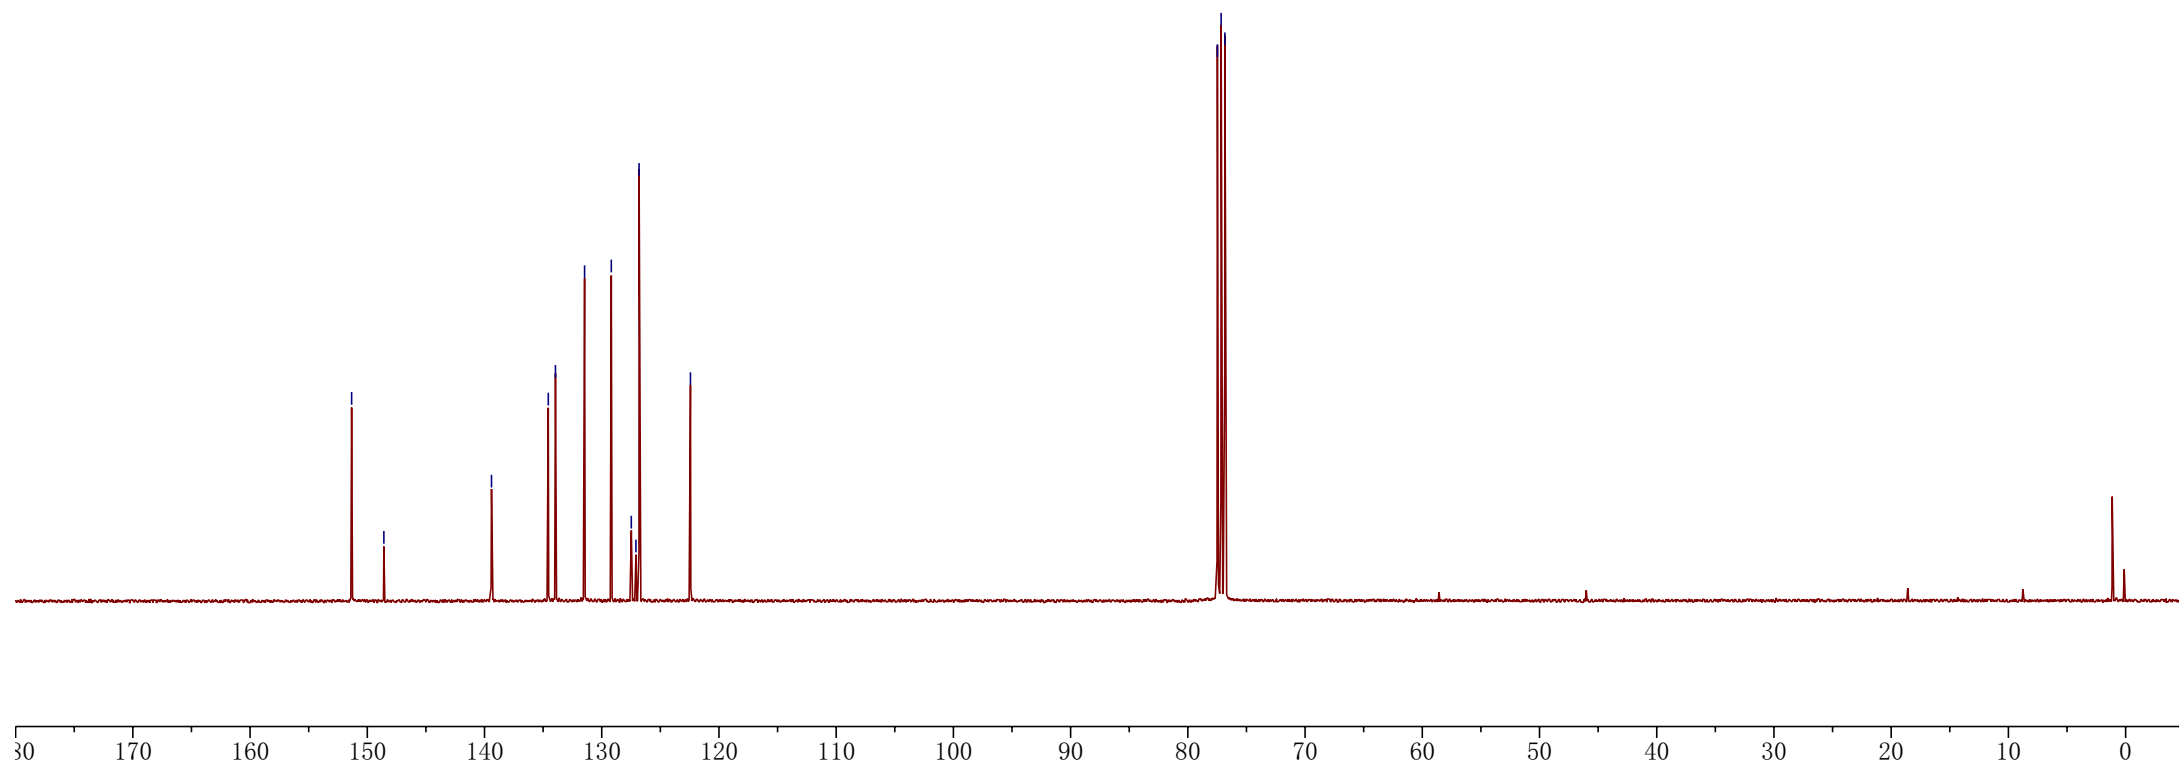

ppm  
SI-111

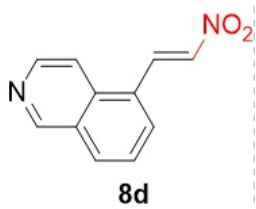

9.344  
8.749  
8.715  
8.706  
8.691  
8.165  
8.144  
8.008  
7.989  
7.941  
7.926  
7.711  
7.703  
7.692  
7.670  
7.260

1.681

0.000

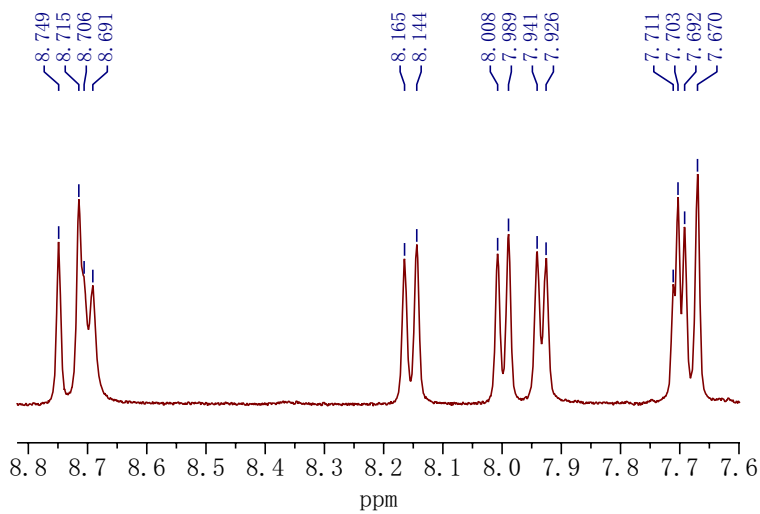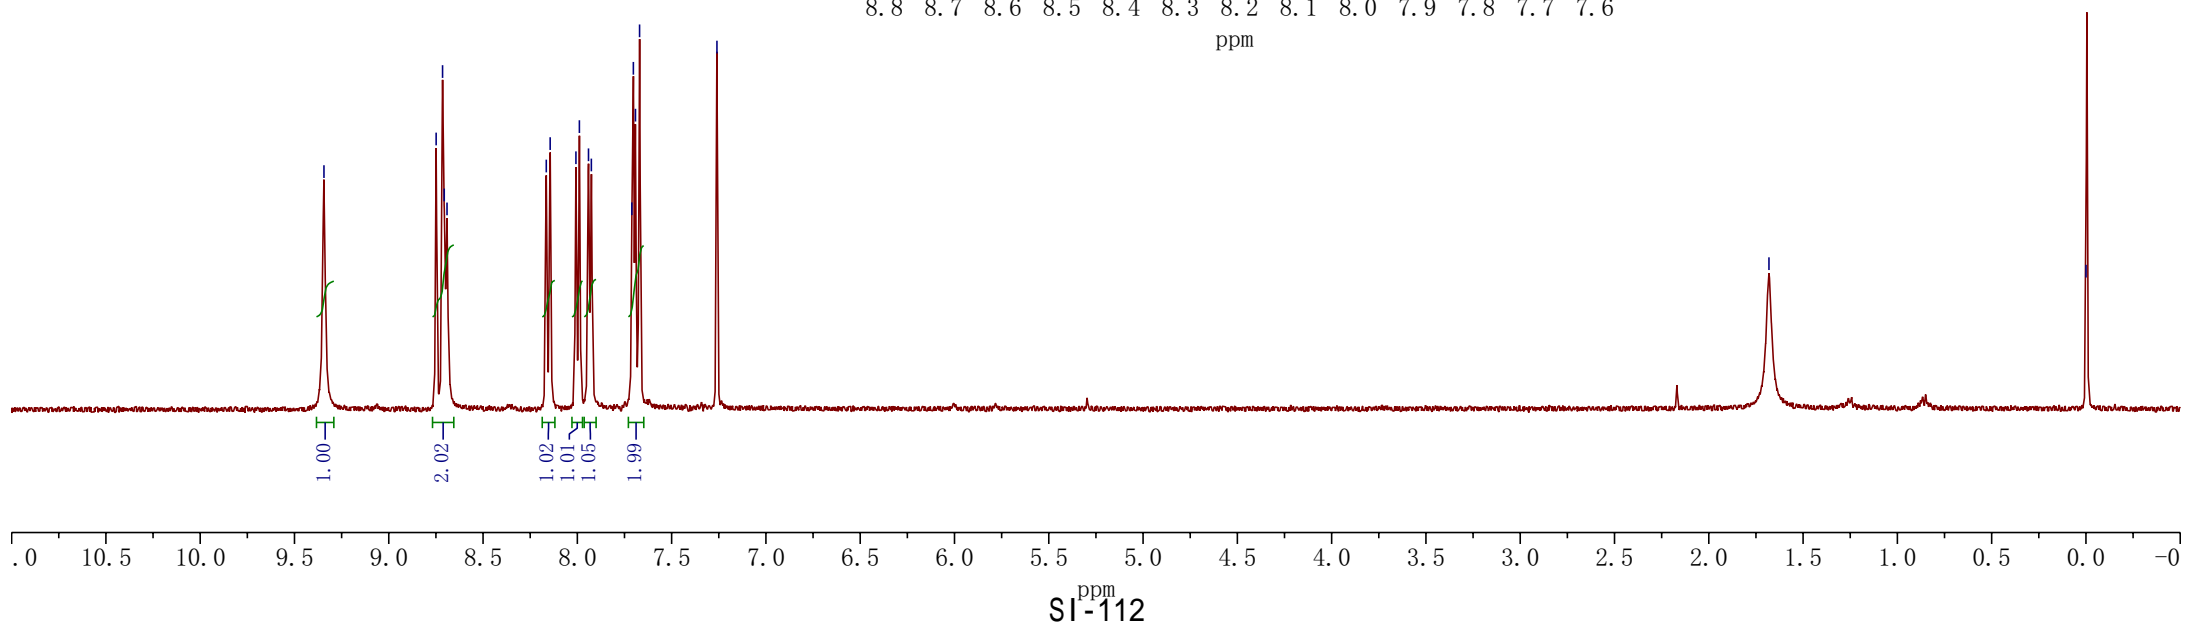



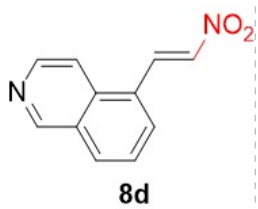

— 153.63  
— 144.87  
— 139.39  
134.46  
134.30  
132.12  
130.34  
127.12  
126.39  
— 116.03

77.48  
77.16  
76.84

200 190 180 170 160 150 140 130 120 110 100 90 80 70 60 50 40 30 20 10

ppm  
SI-113

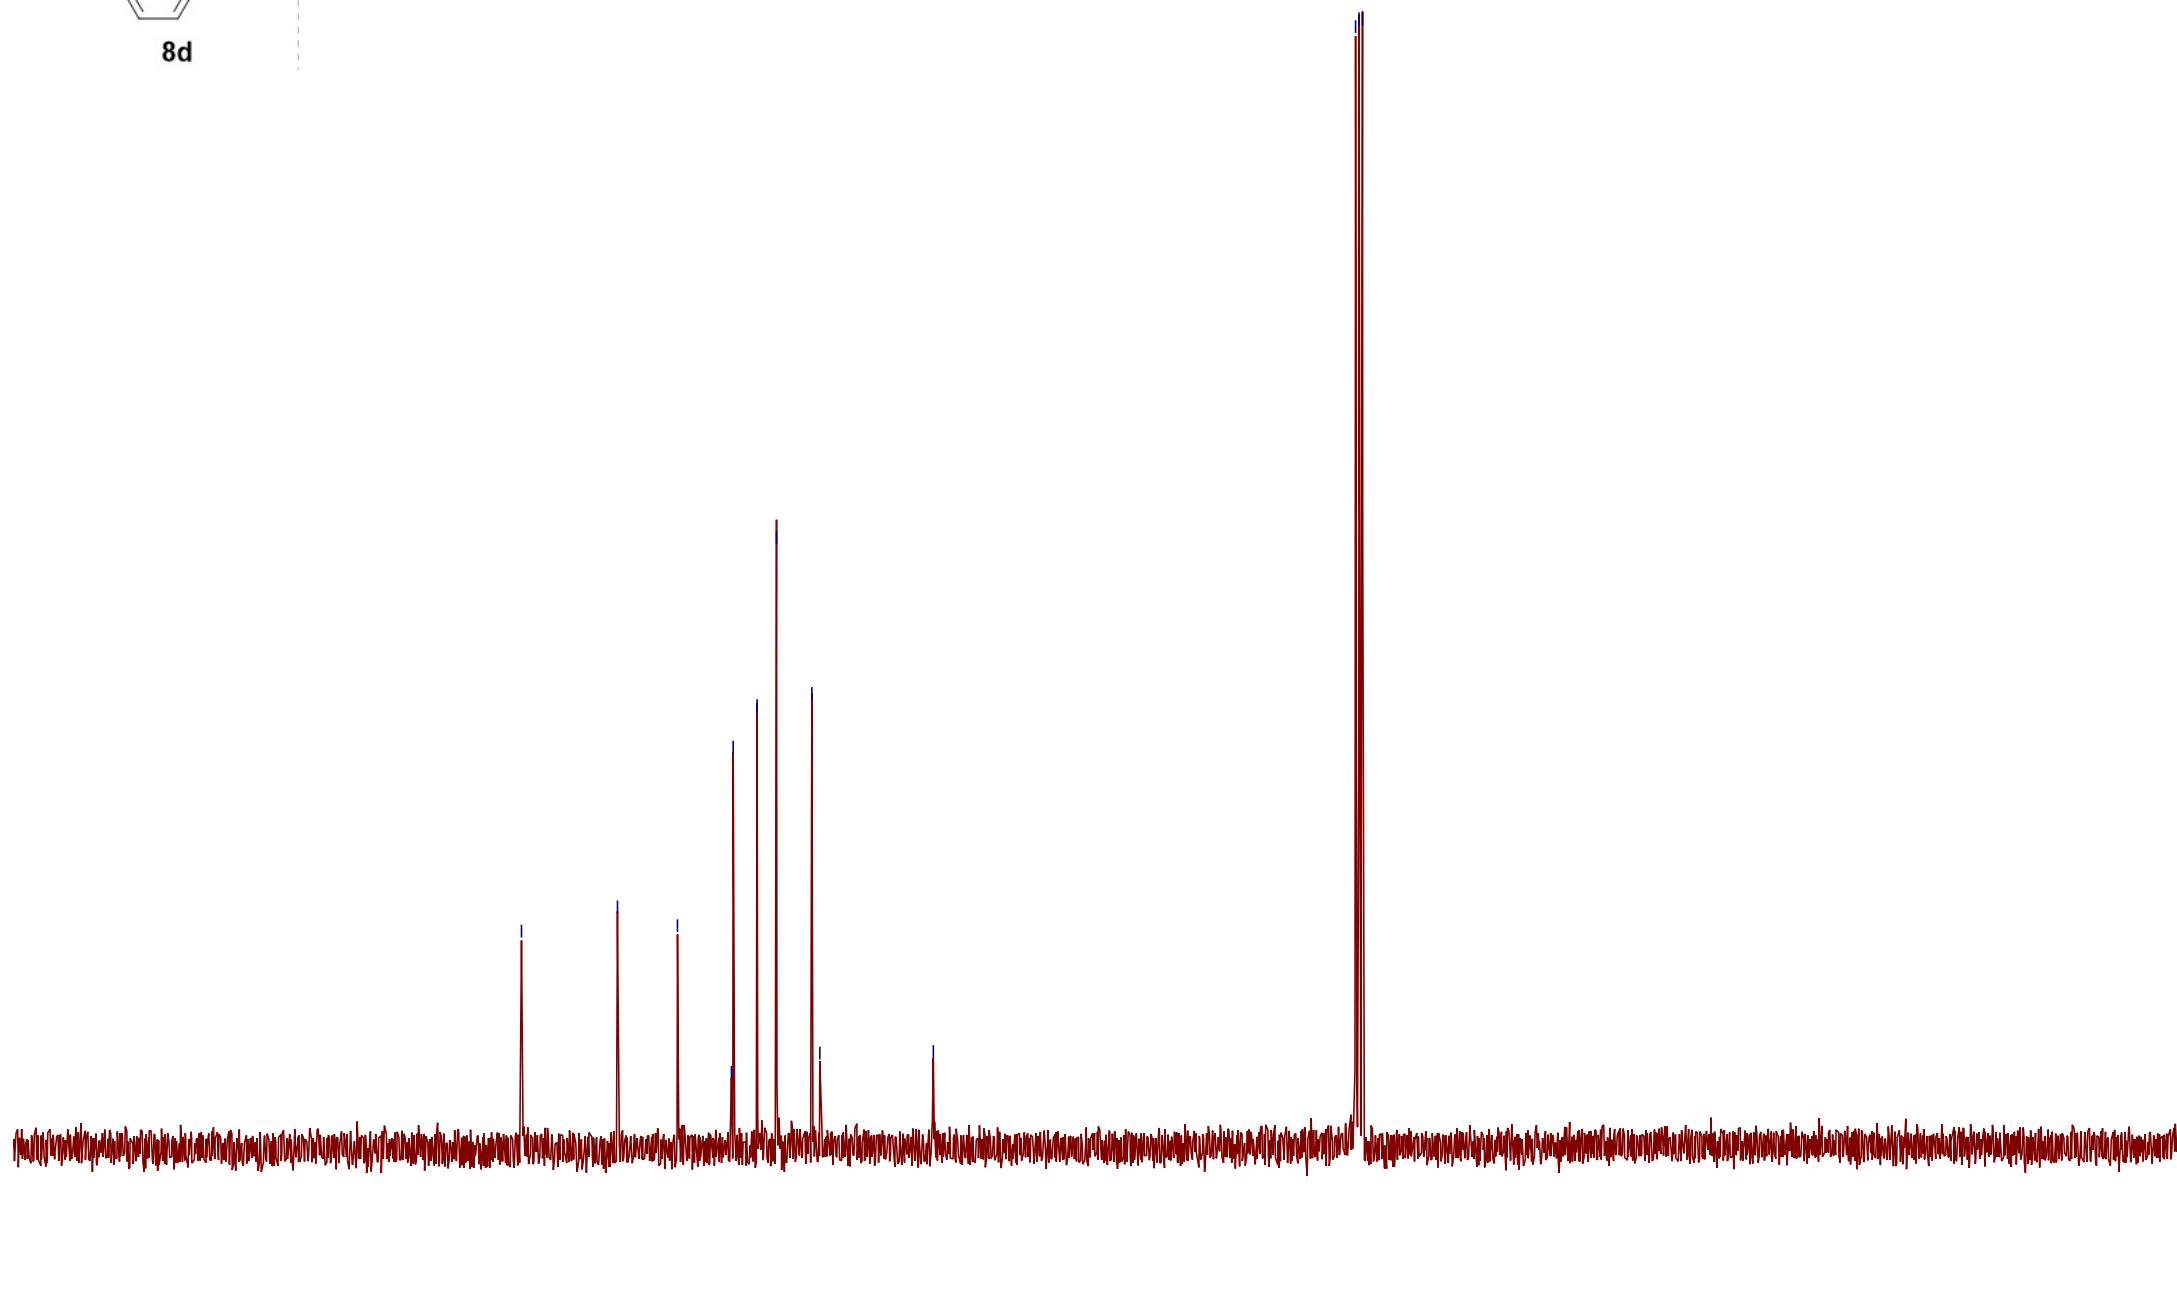

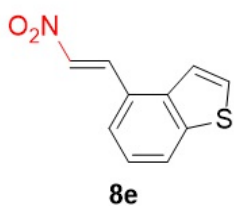

8.545  
8.511

8.037  
8.017  
7.730  
7.695  
7.680  
7.649  
7.642  
7.629  
7.437  
7.418  
7.398  
7.261  
7.260

1.550

-0.000

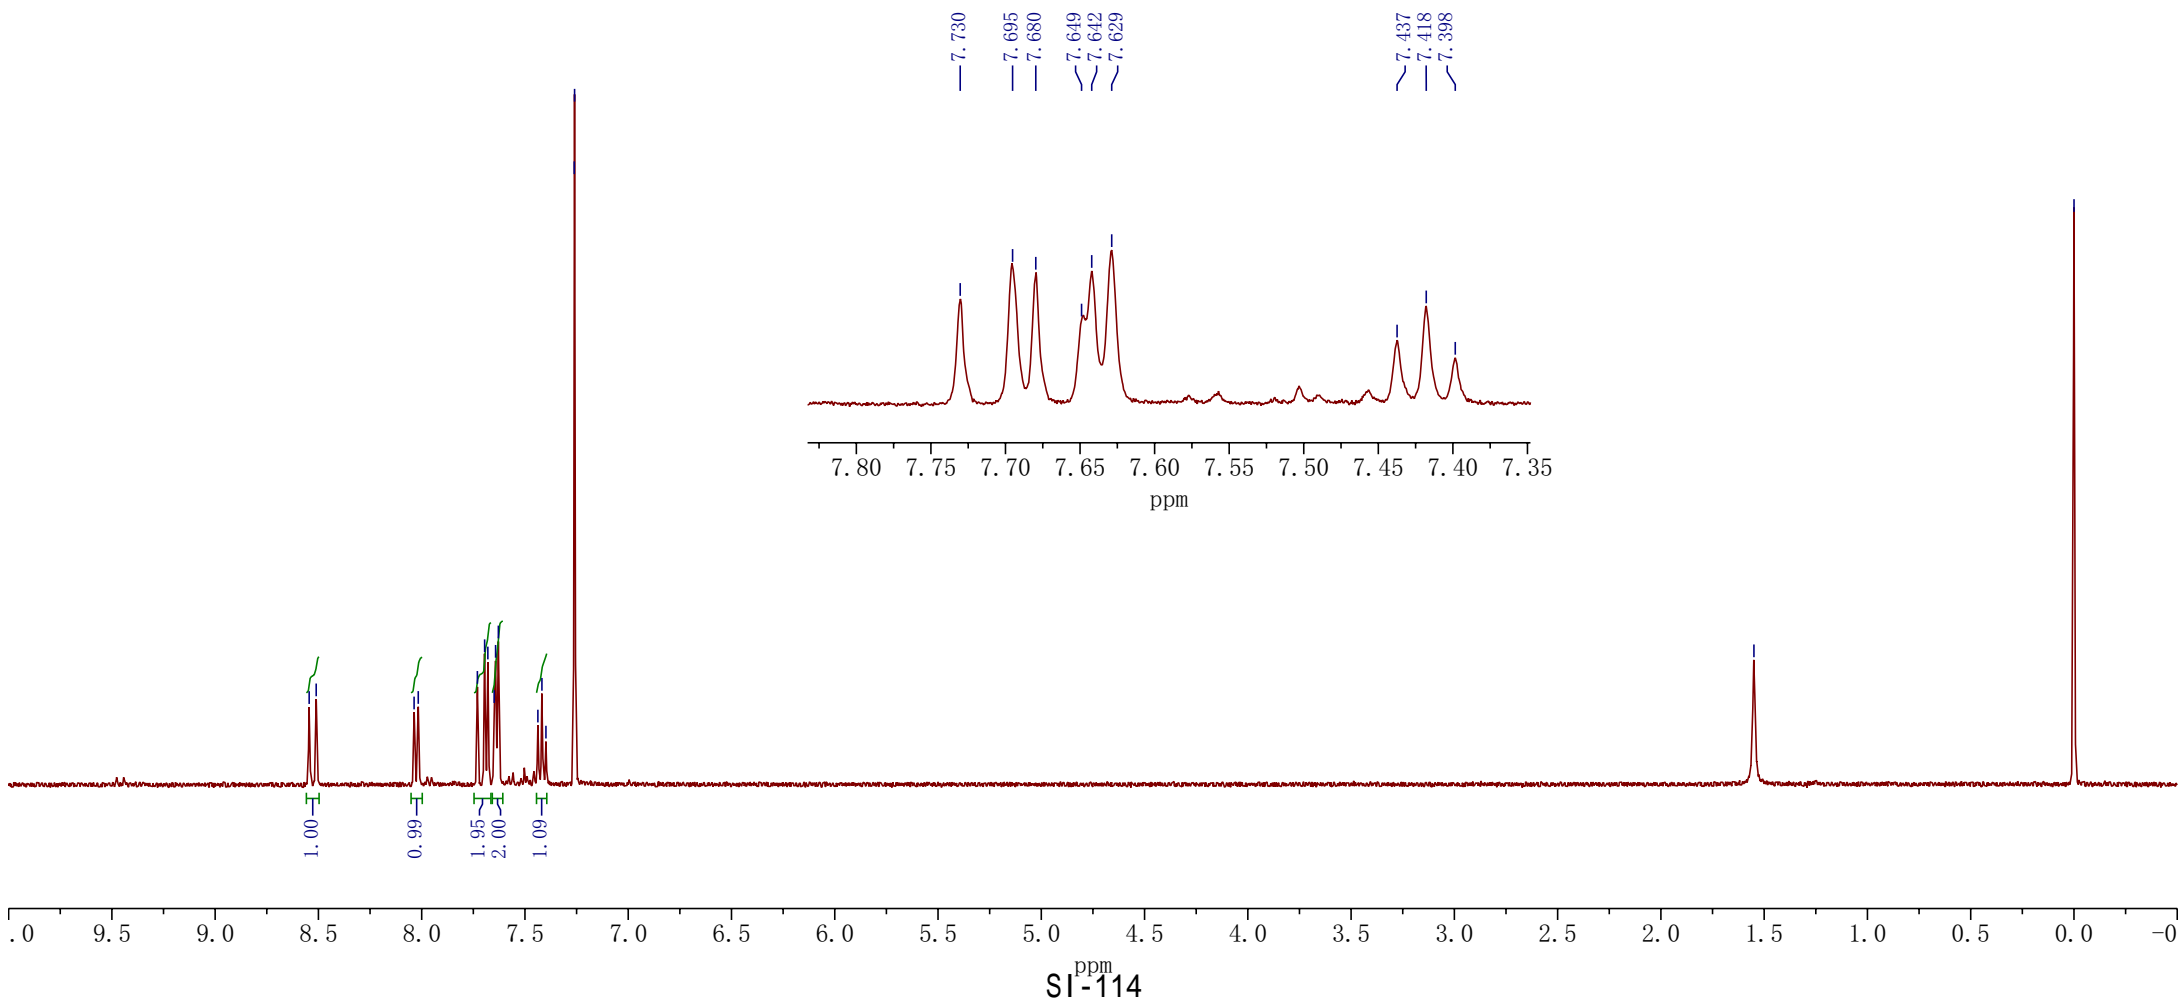

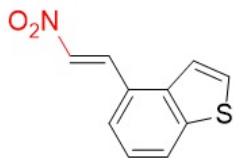

8e

- 141.34
- 139.34
- 137.93
- 136.73
- 129.60
- 126.43
- 125.12
- 124.50
- 124.34
- 121.20

- 77.48
- 77.16
- 76.84

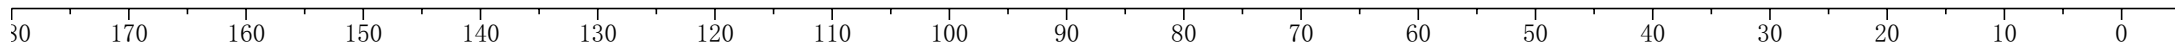

SI-115

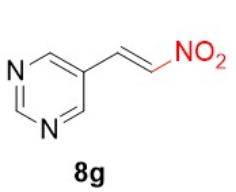

— 9.299

— 8.937

< 7.976

< 7.941

< 7.691

< 7.656

— 7.260

— 1.634

< 1.326

< 1.279

< 1.277

< 1.248

< 1.246

< 0.063

< -0.005

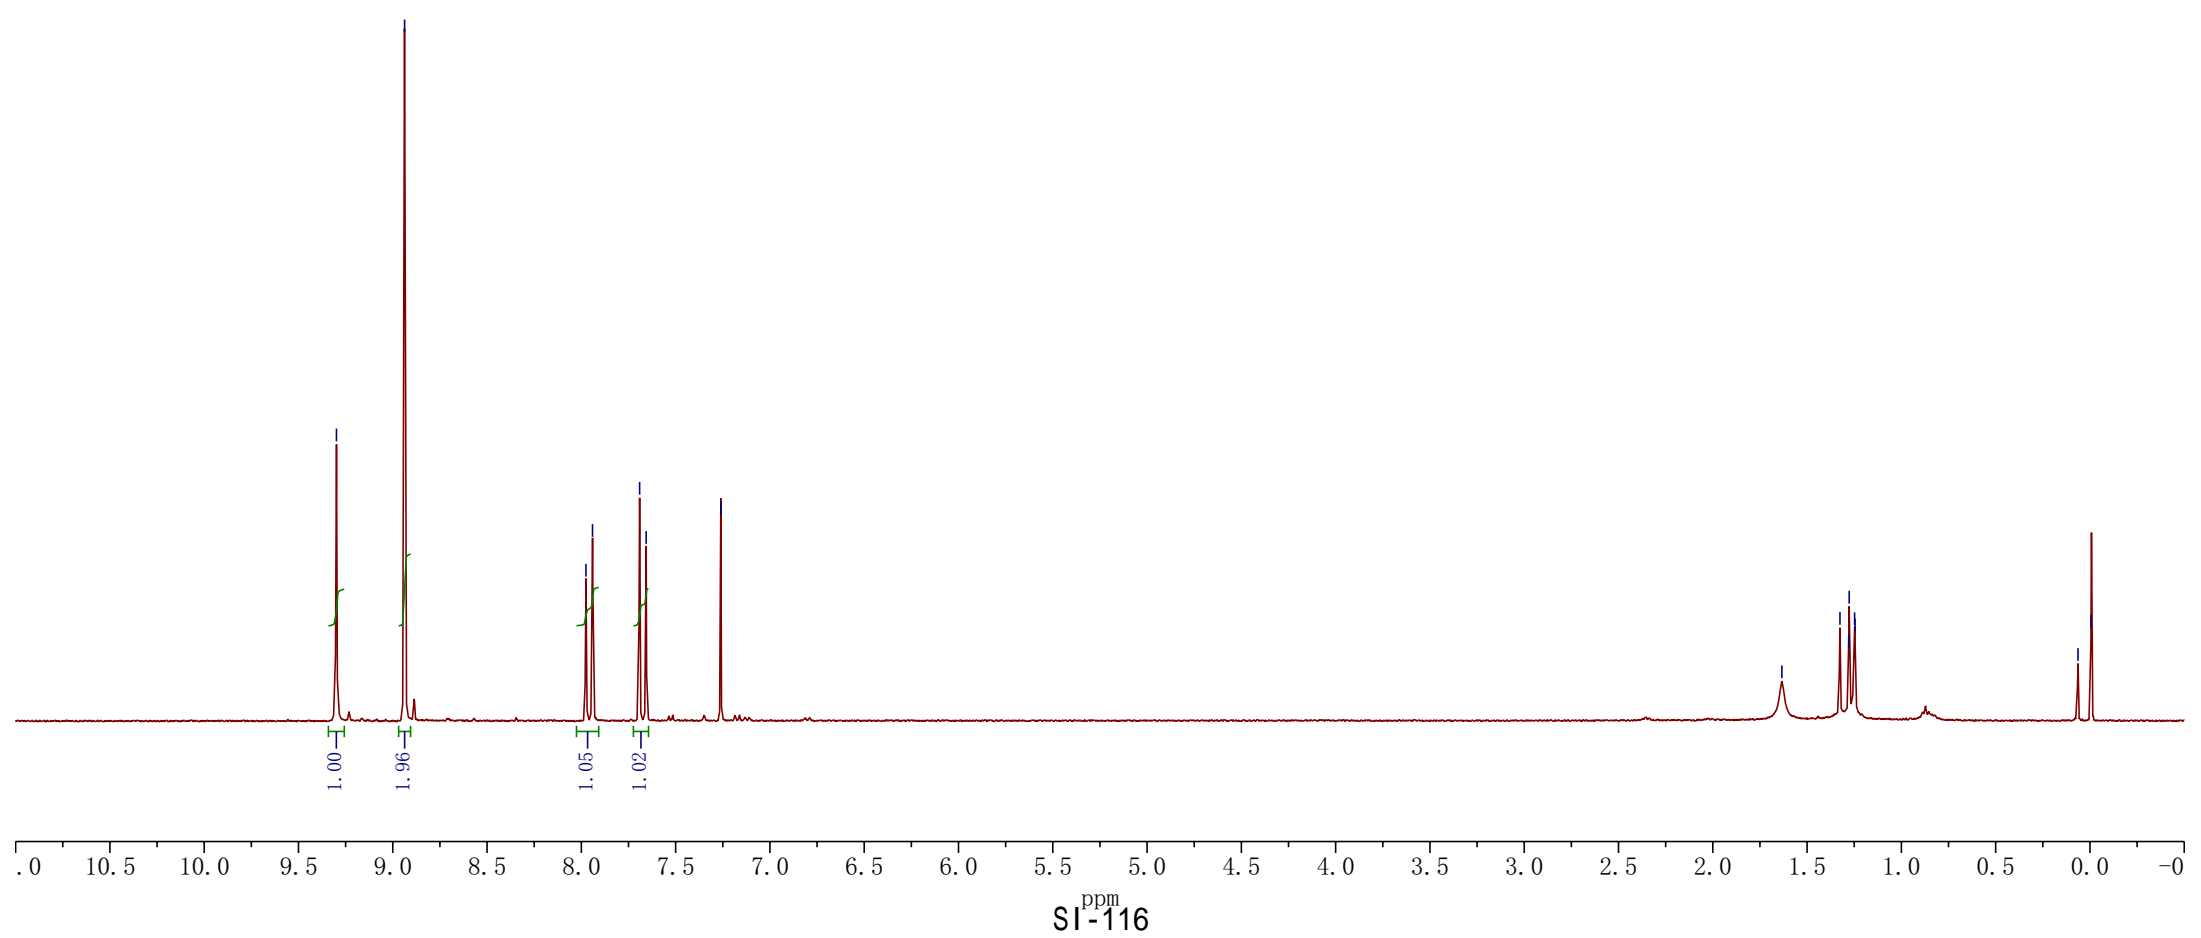

— 160.64

— 156.46

— 139.55

— 131.91

— 124.84

77.48  
77.16  
76.84

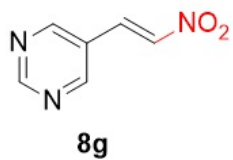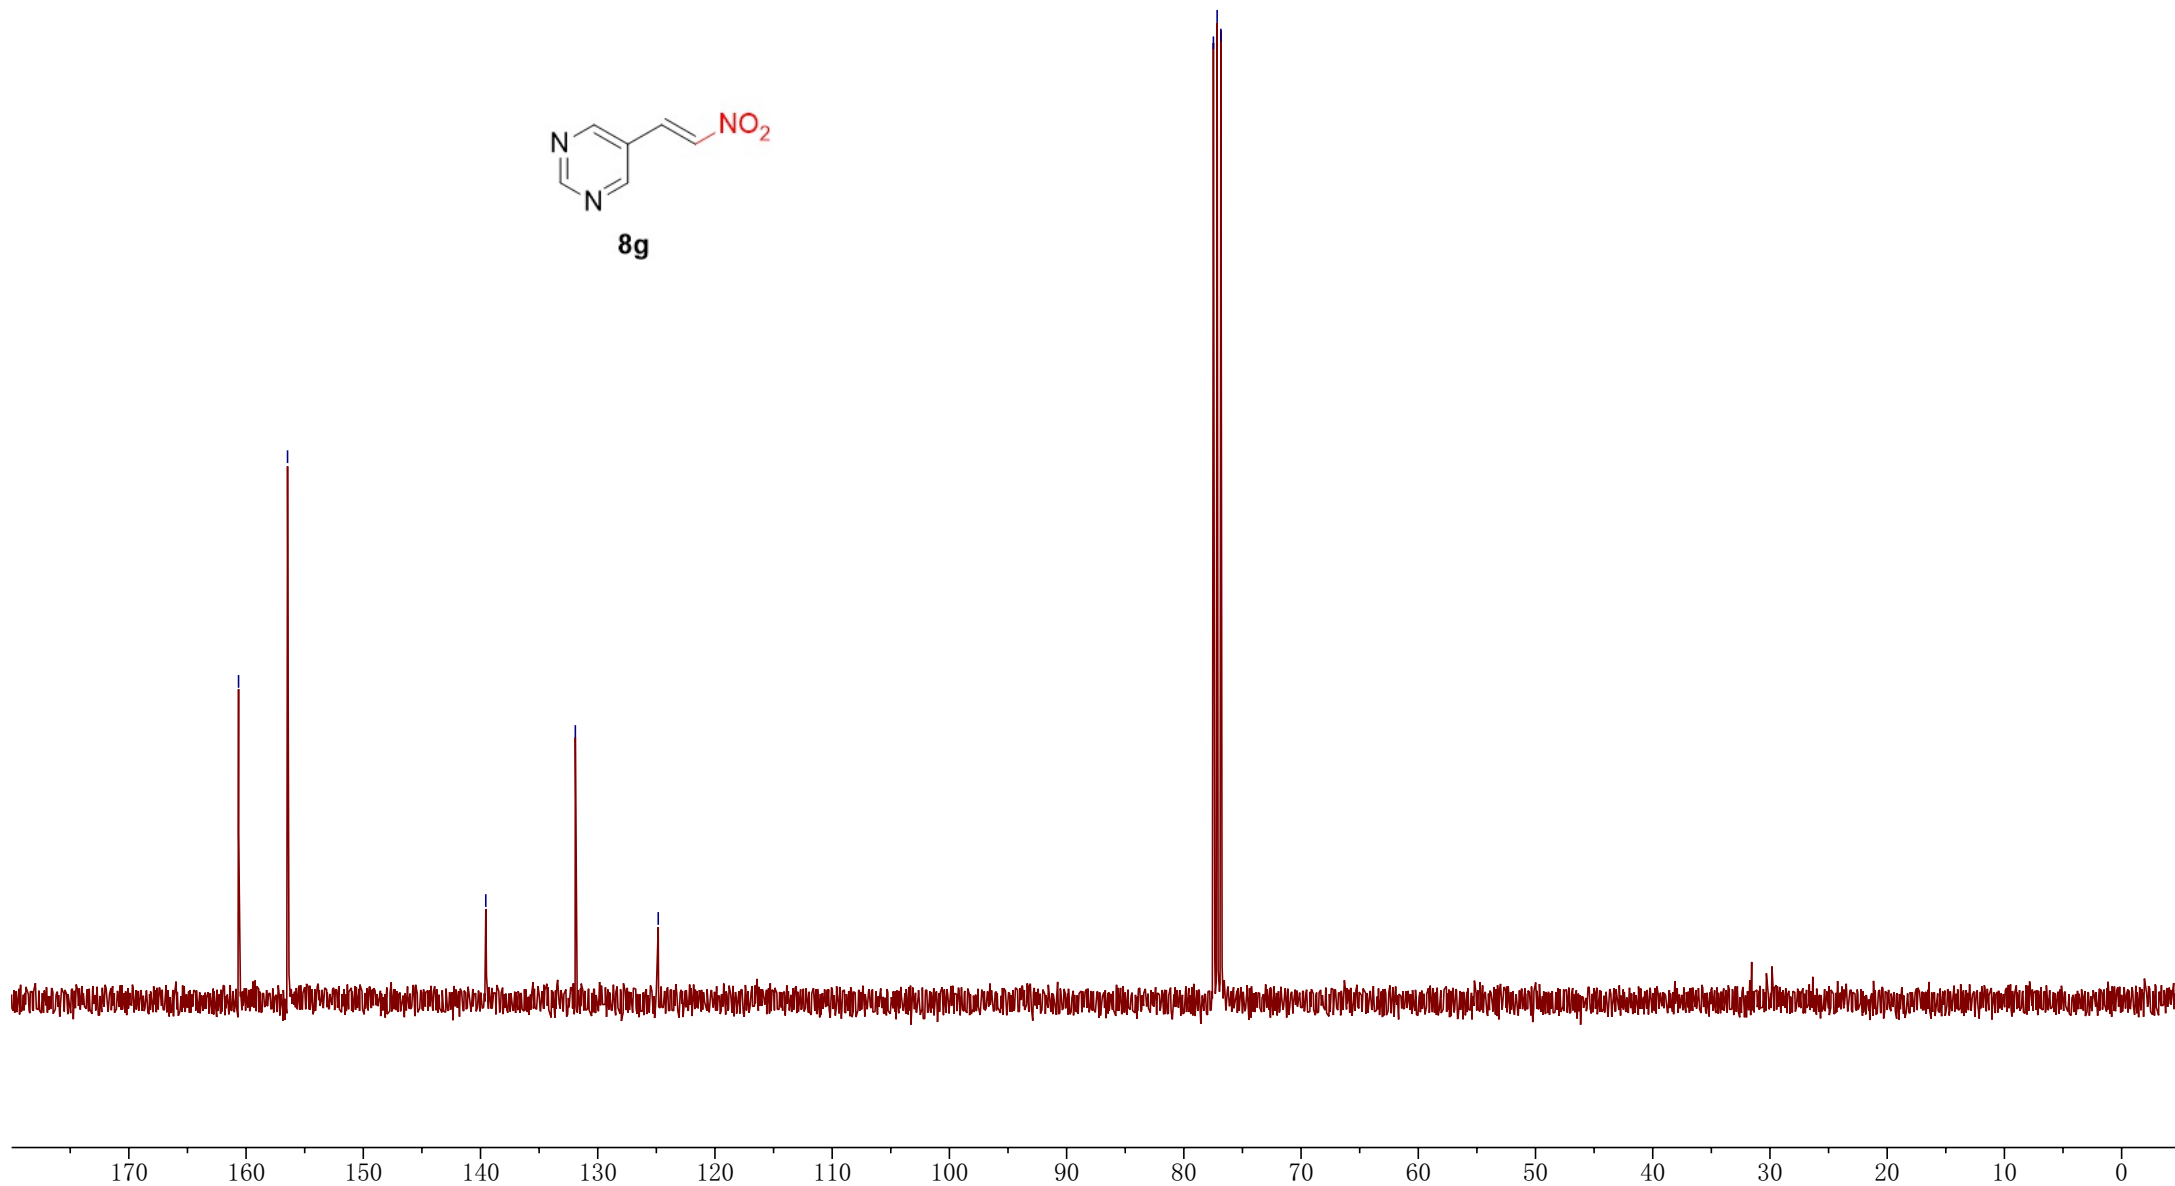

ppm  
SI-117

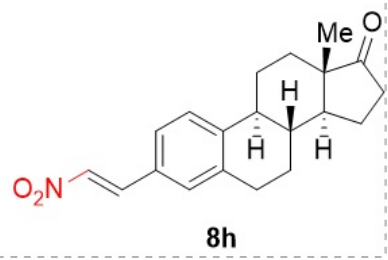

7.974  
7.939  
7.580  
7.546  
7.385  
7.364  
7.346  
7.323  
7.279  
7.260

2.965  
2.954  
2.941  
2.534  
2.509  
2.489  
2.419  
2.360  
2.336  
2.315  
2.305  
2.185  
2.162  
2.116  
2.097  
2.087  
2.081  
2.073  
2.065  
2.046  
2.007  
1.984  
1.977  
1.668  
1.646  
1.638  
1.617  
1.609  
1.592  
1.584  
1.567  
1.553  
1.547  
1.536  
1.527  
1.507  
1.498  
1.475  
1.455  
1.428  
0.922  
0.000

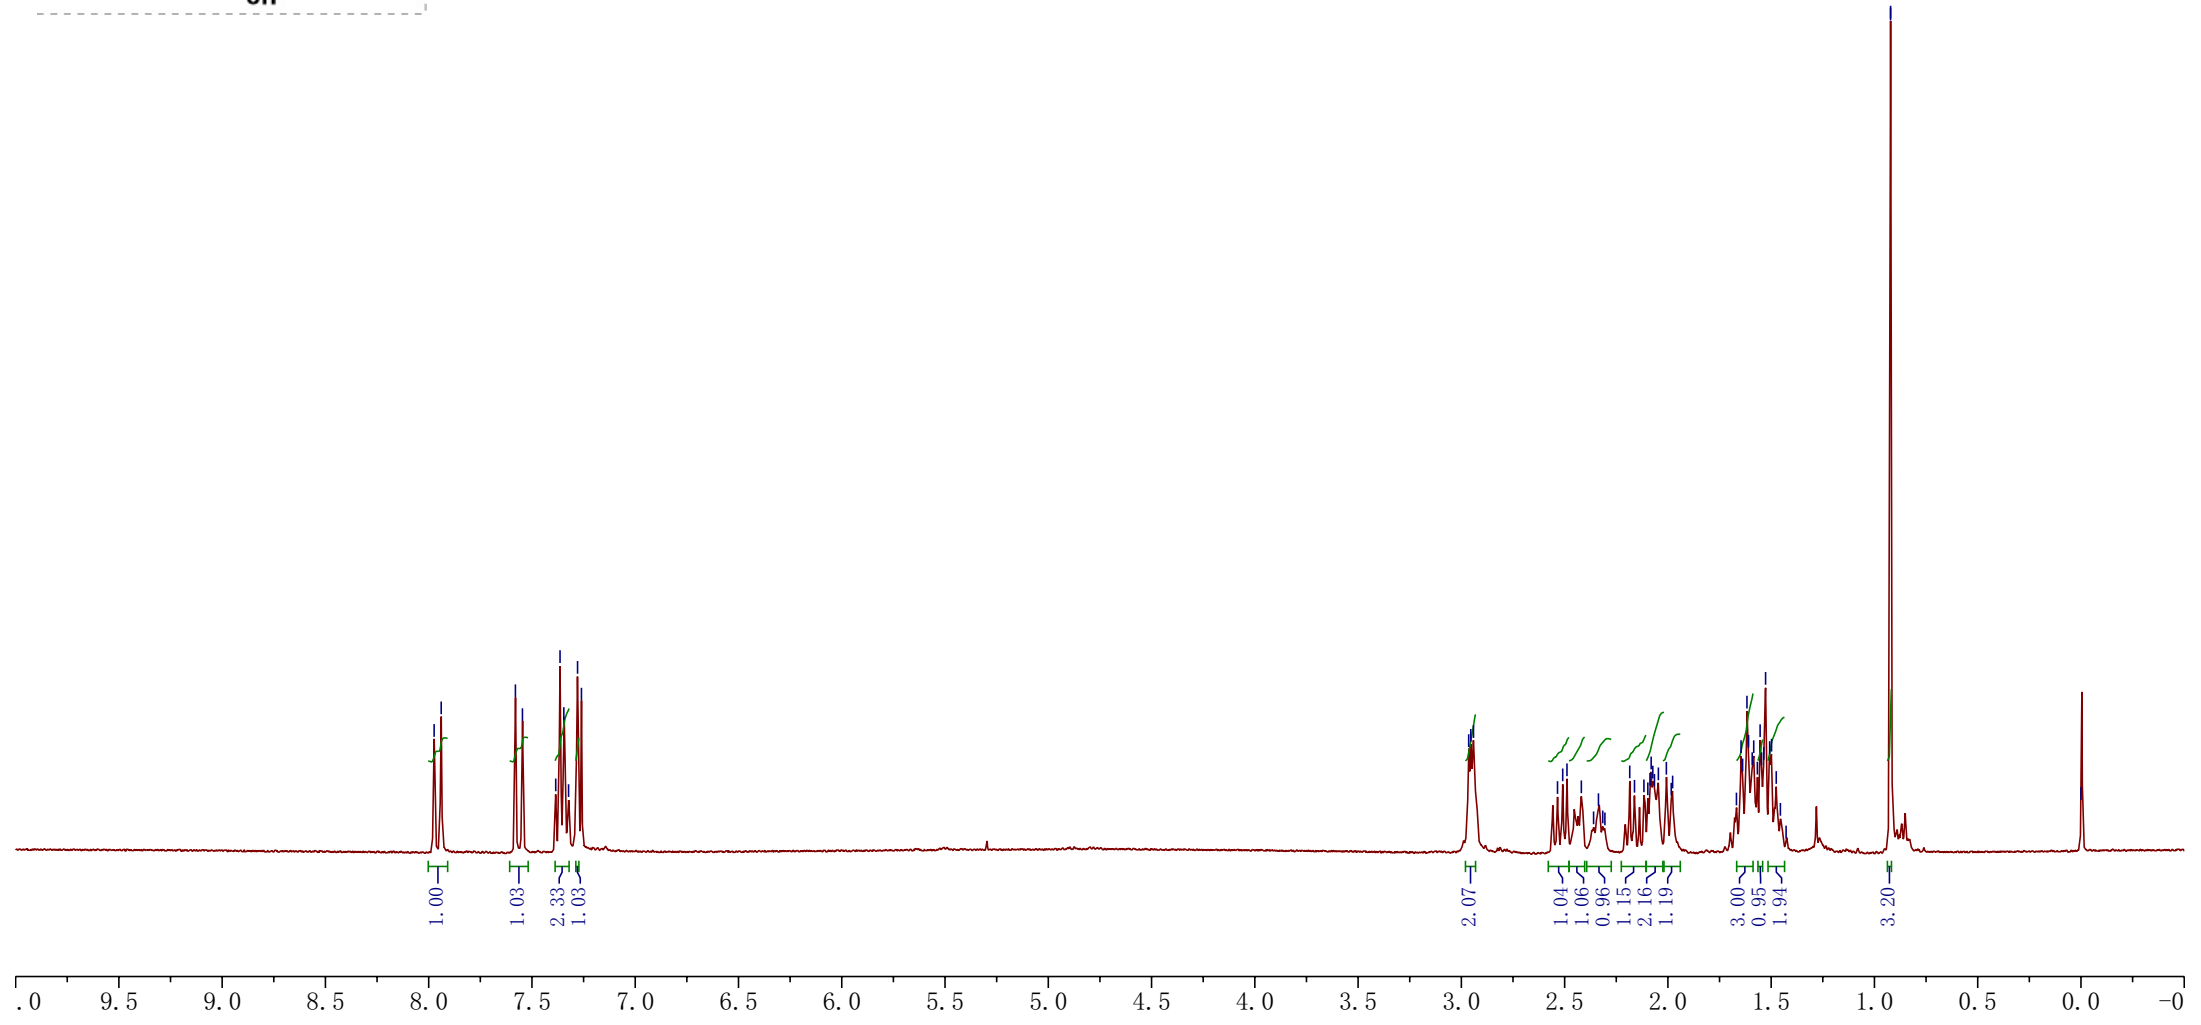

SI-118

— 220.60

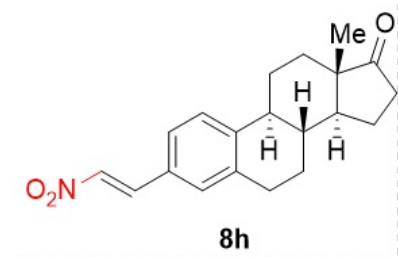

— 144.97

— 139.25  
— 137.98  
— 136.61

— 130.05  
— 127.72  
— 126.65  
— 126.62

— 77.48  
— 77.16  
— 76.84

— 50.61  
— 48.01  
— 44.84

— 37.94  
— 35.93  
— 31.64  
— 29.33  
— 26.31  
— 25.67  
— 21.71

— 13.94

30 220 210 200 190 180 170 160 150 140 130 120 110 100 90 80 70 60 50 40 30 20 10 0

ppm  
SI-119

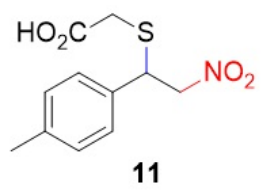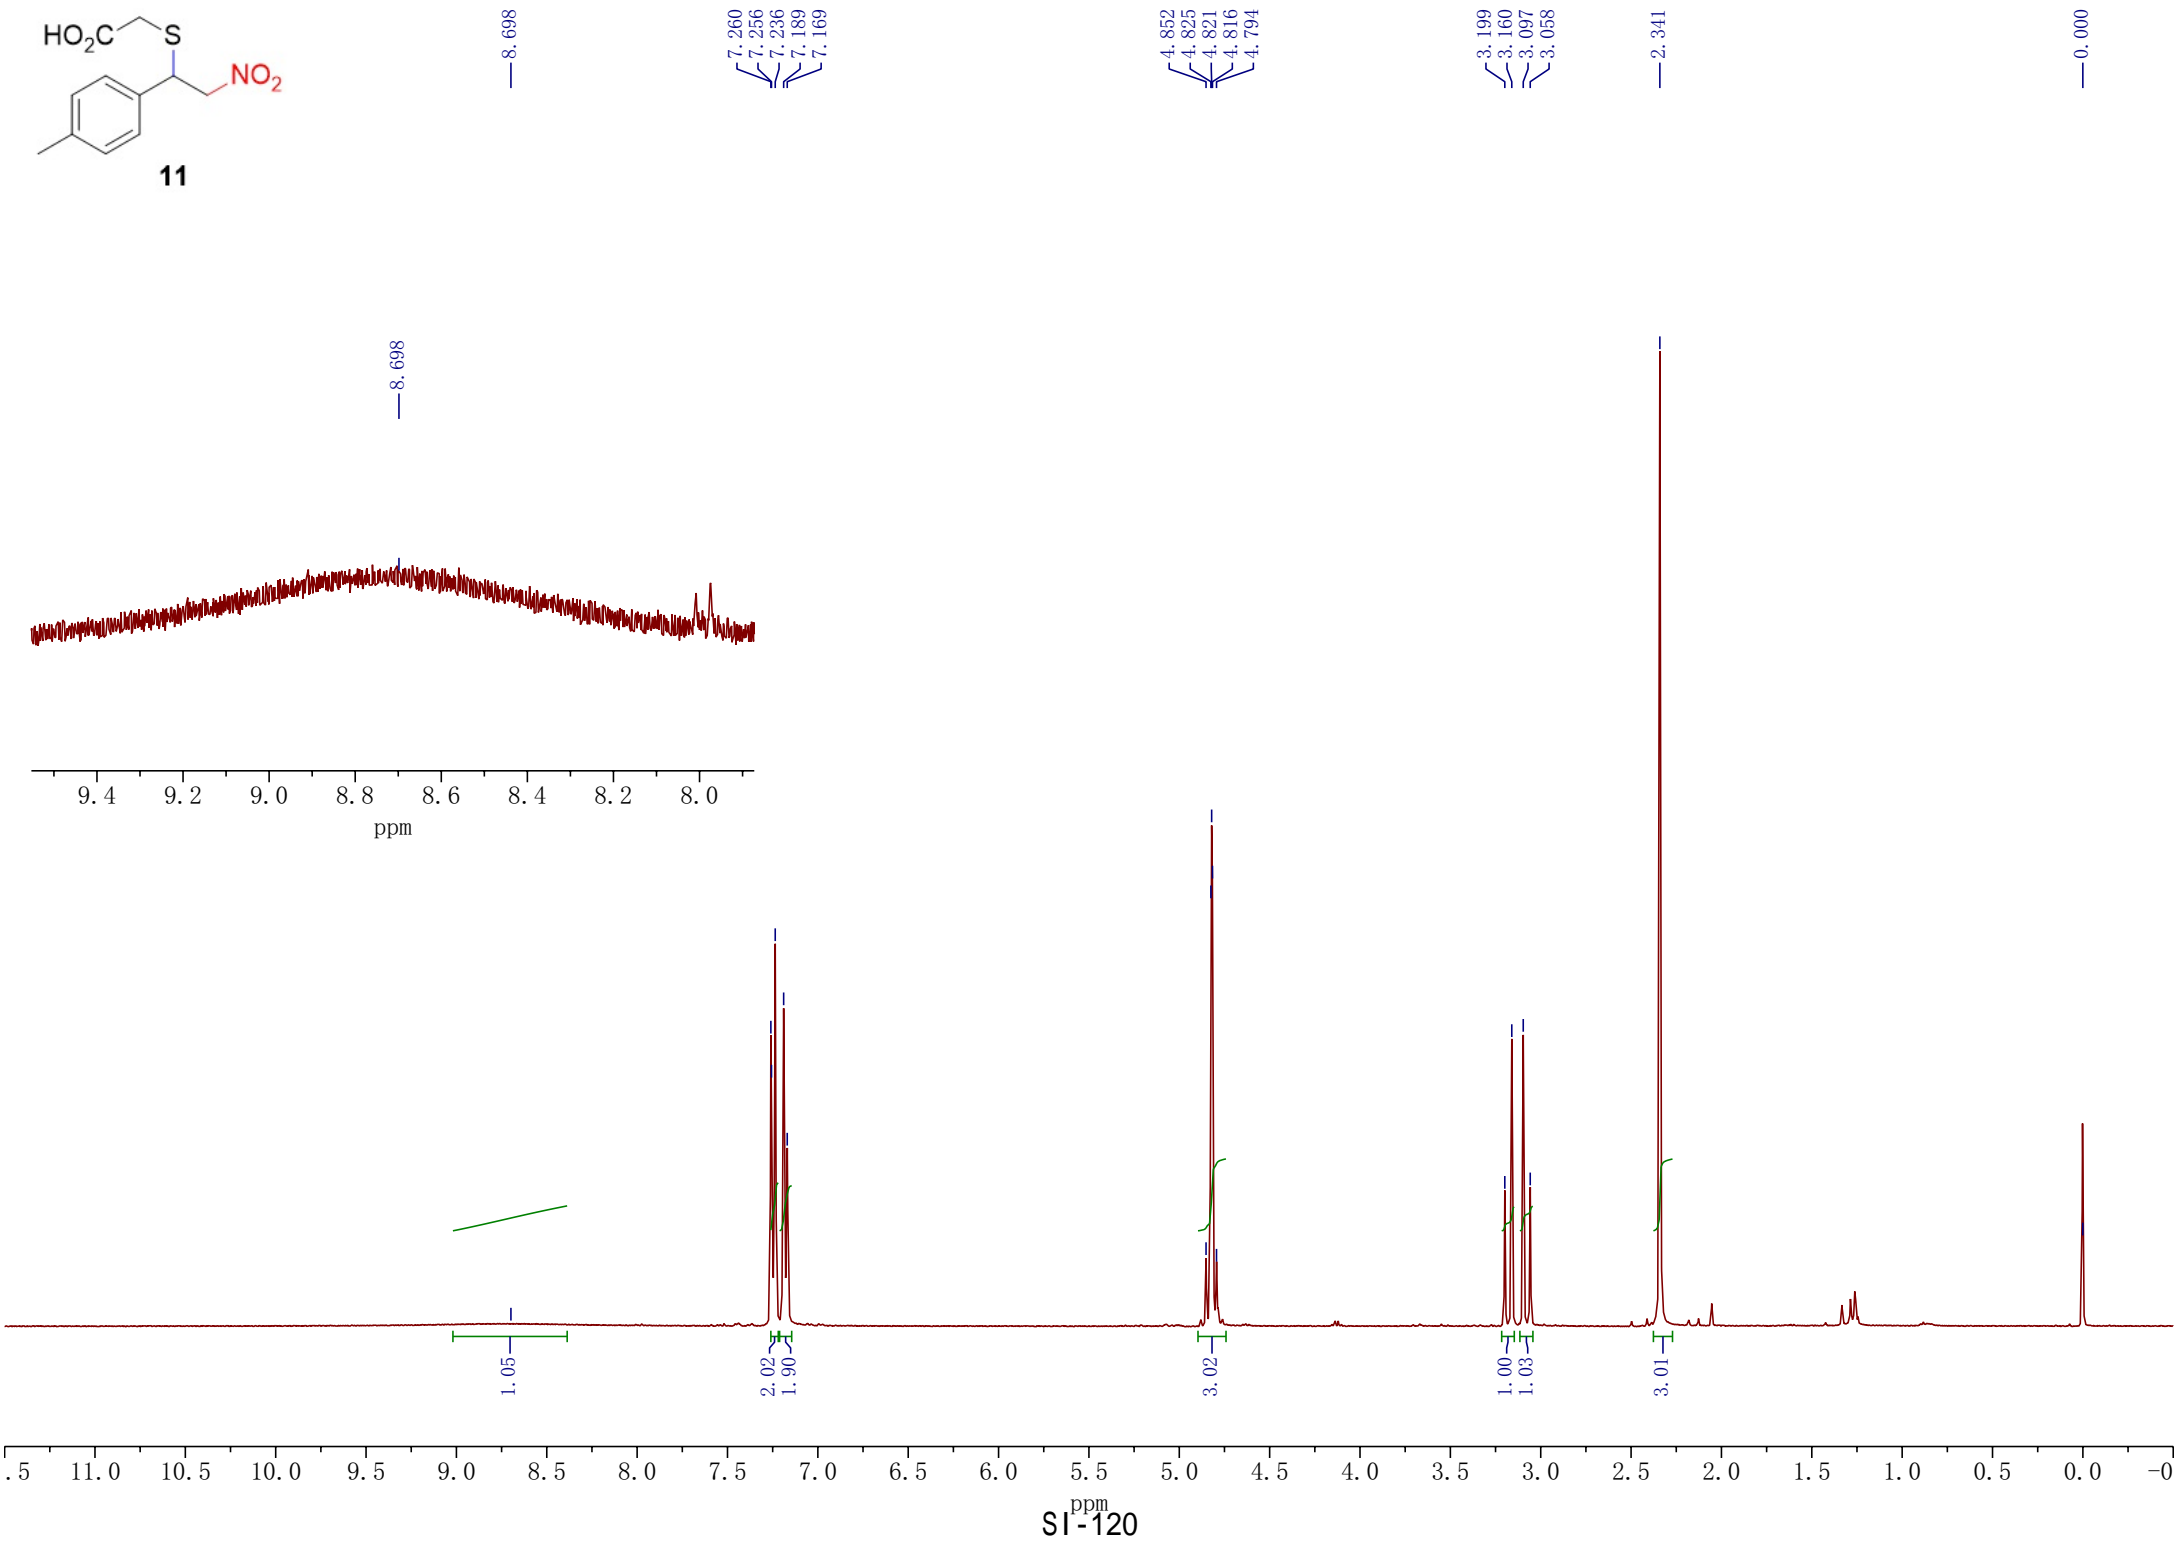



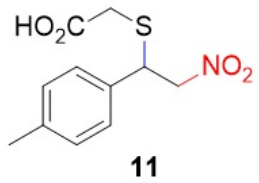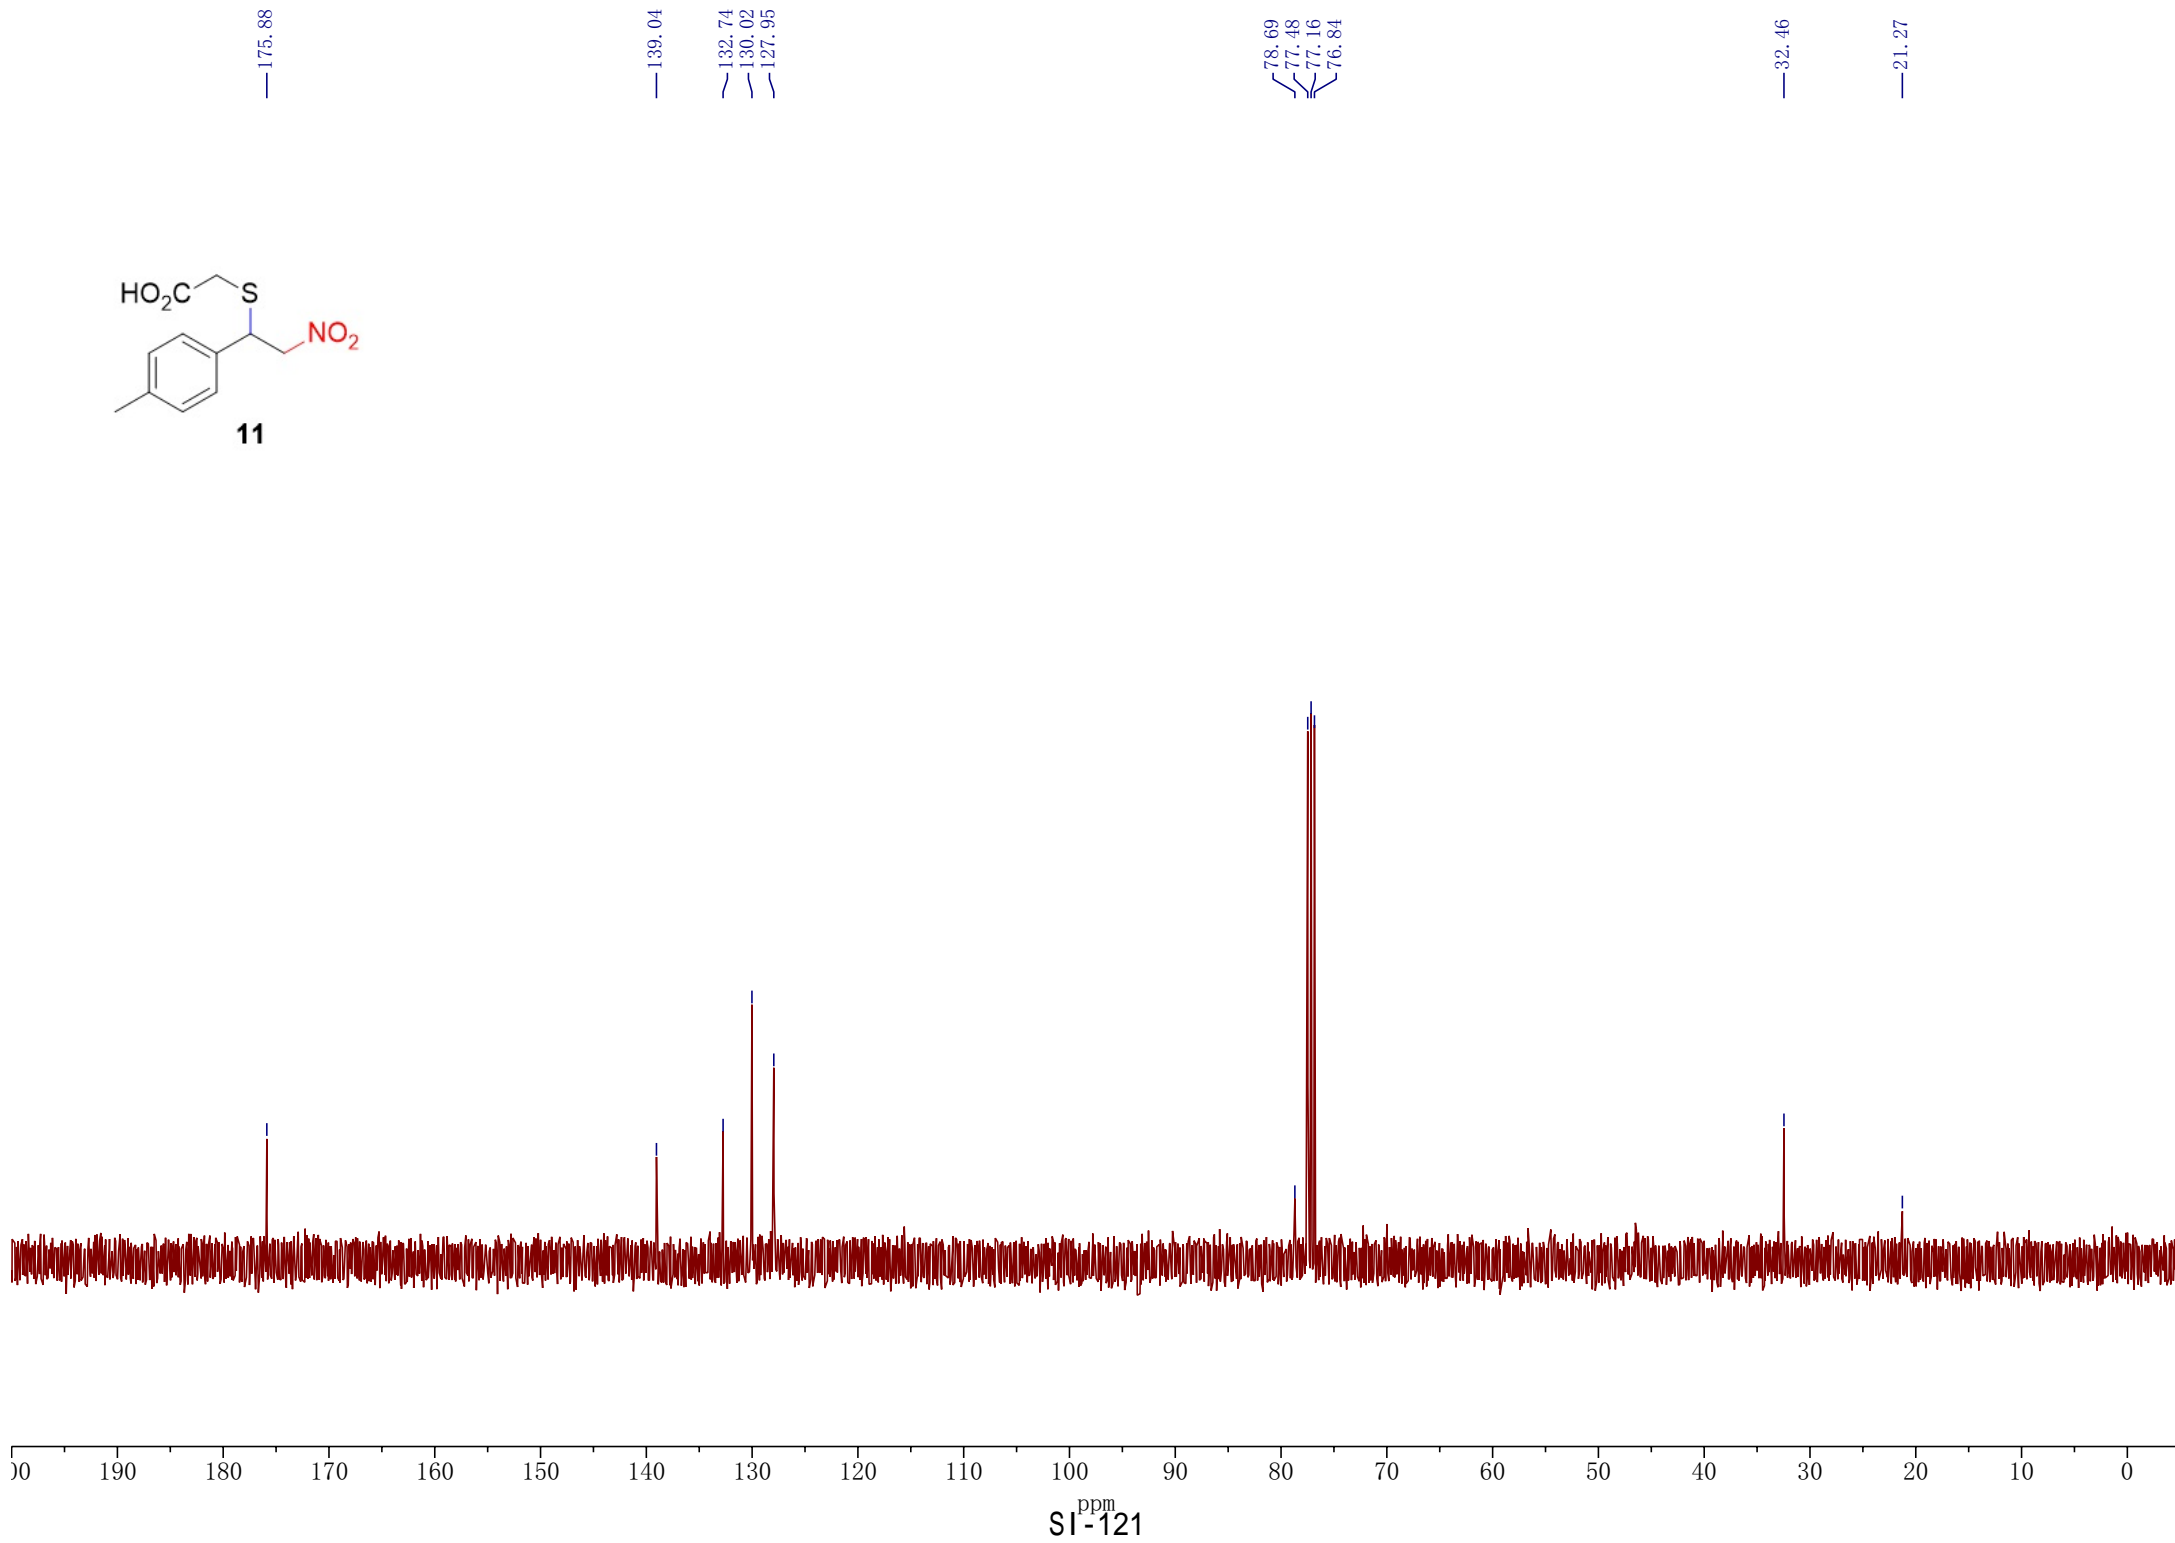

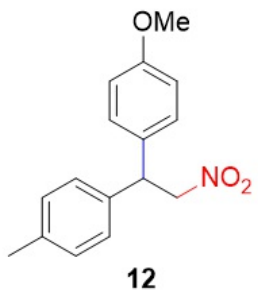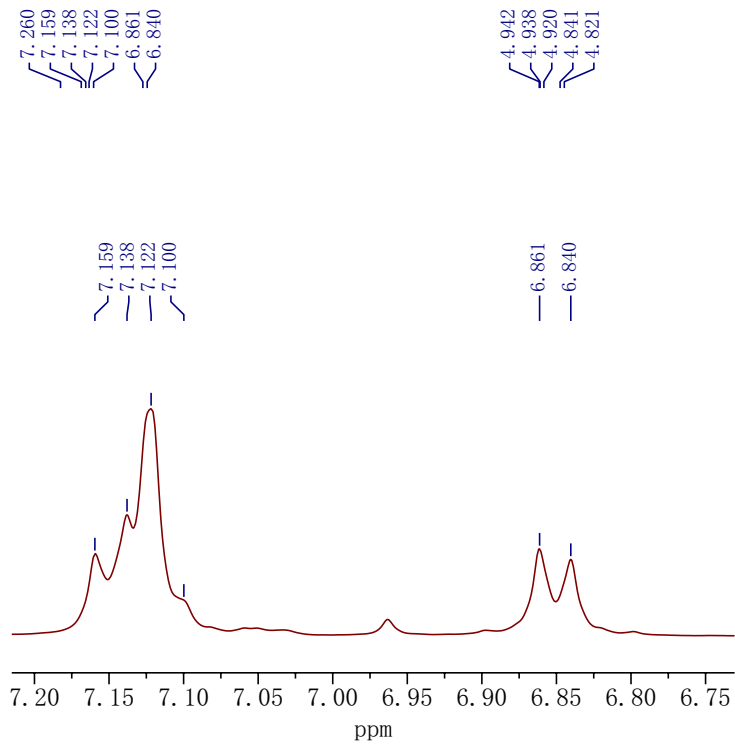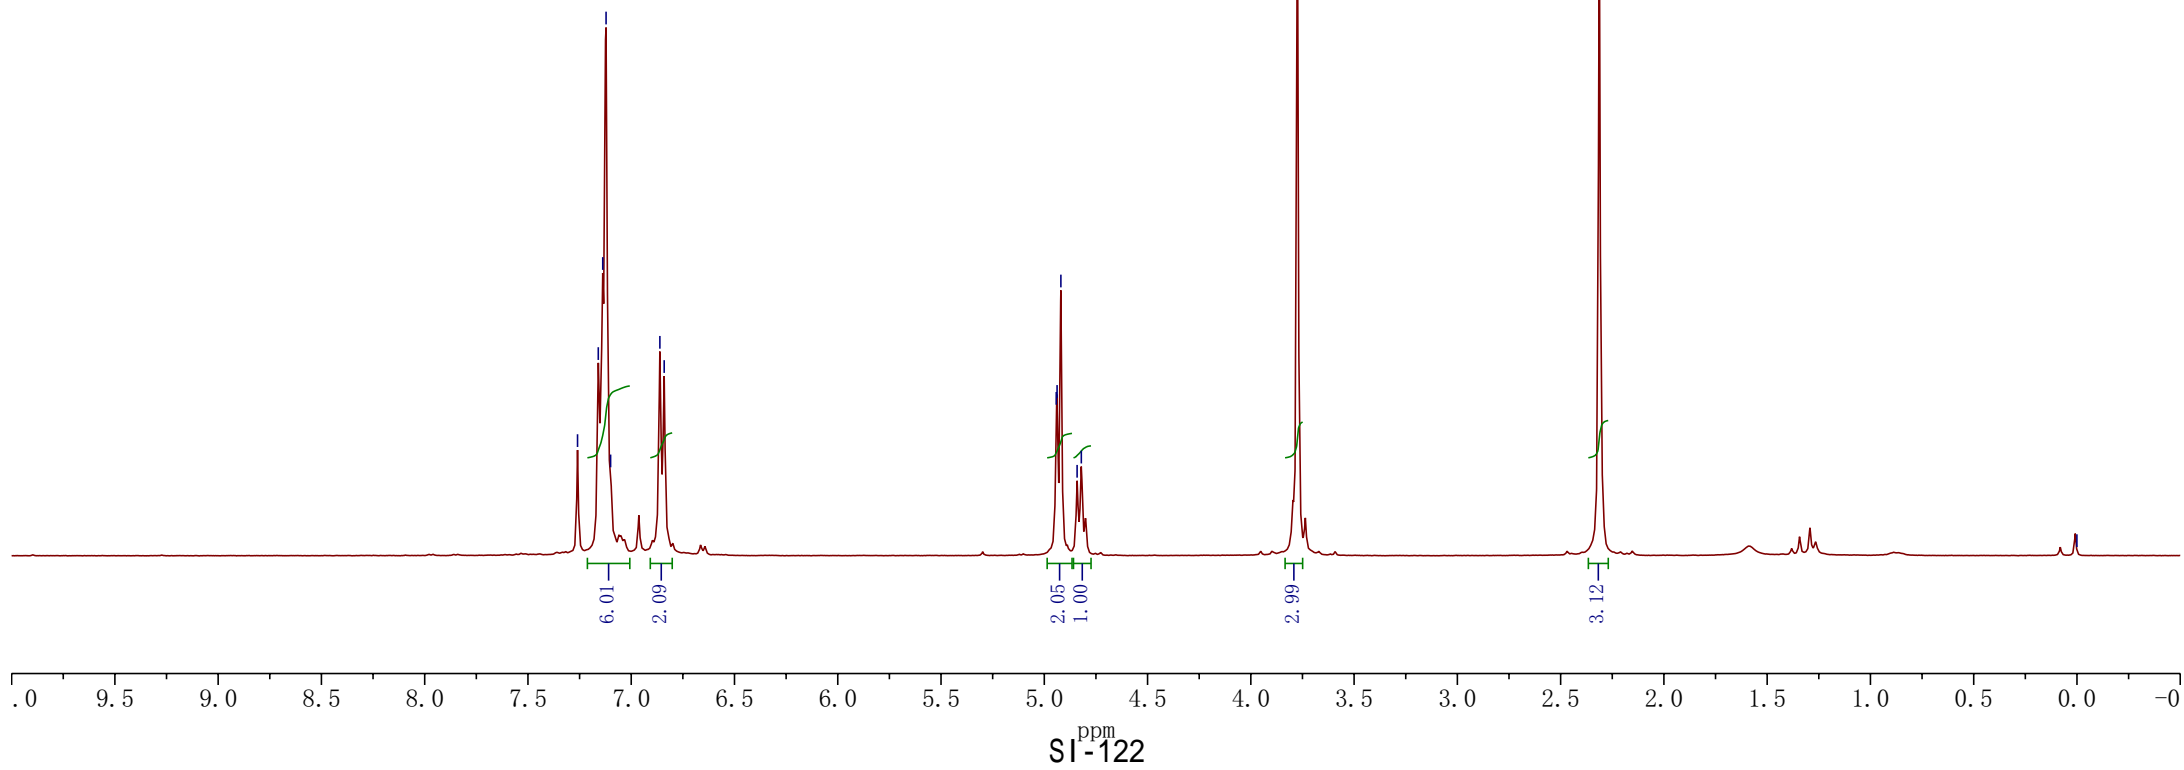

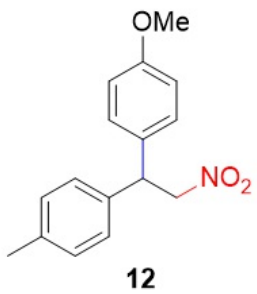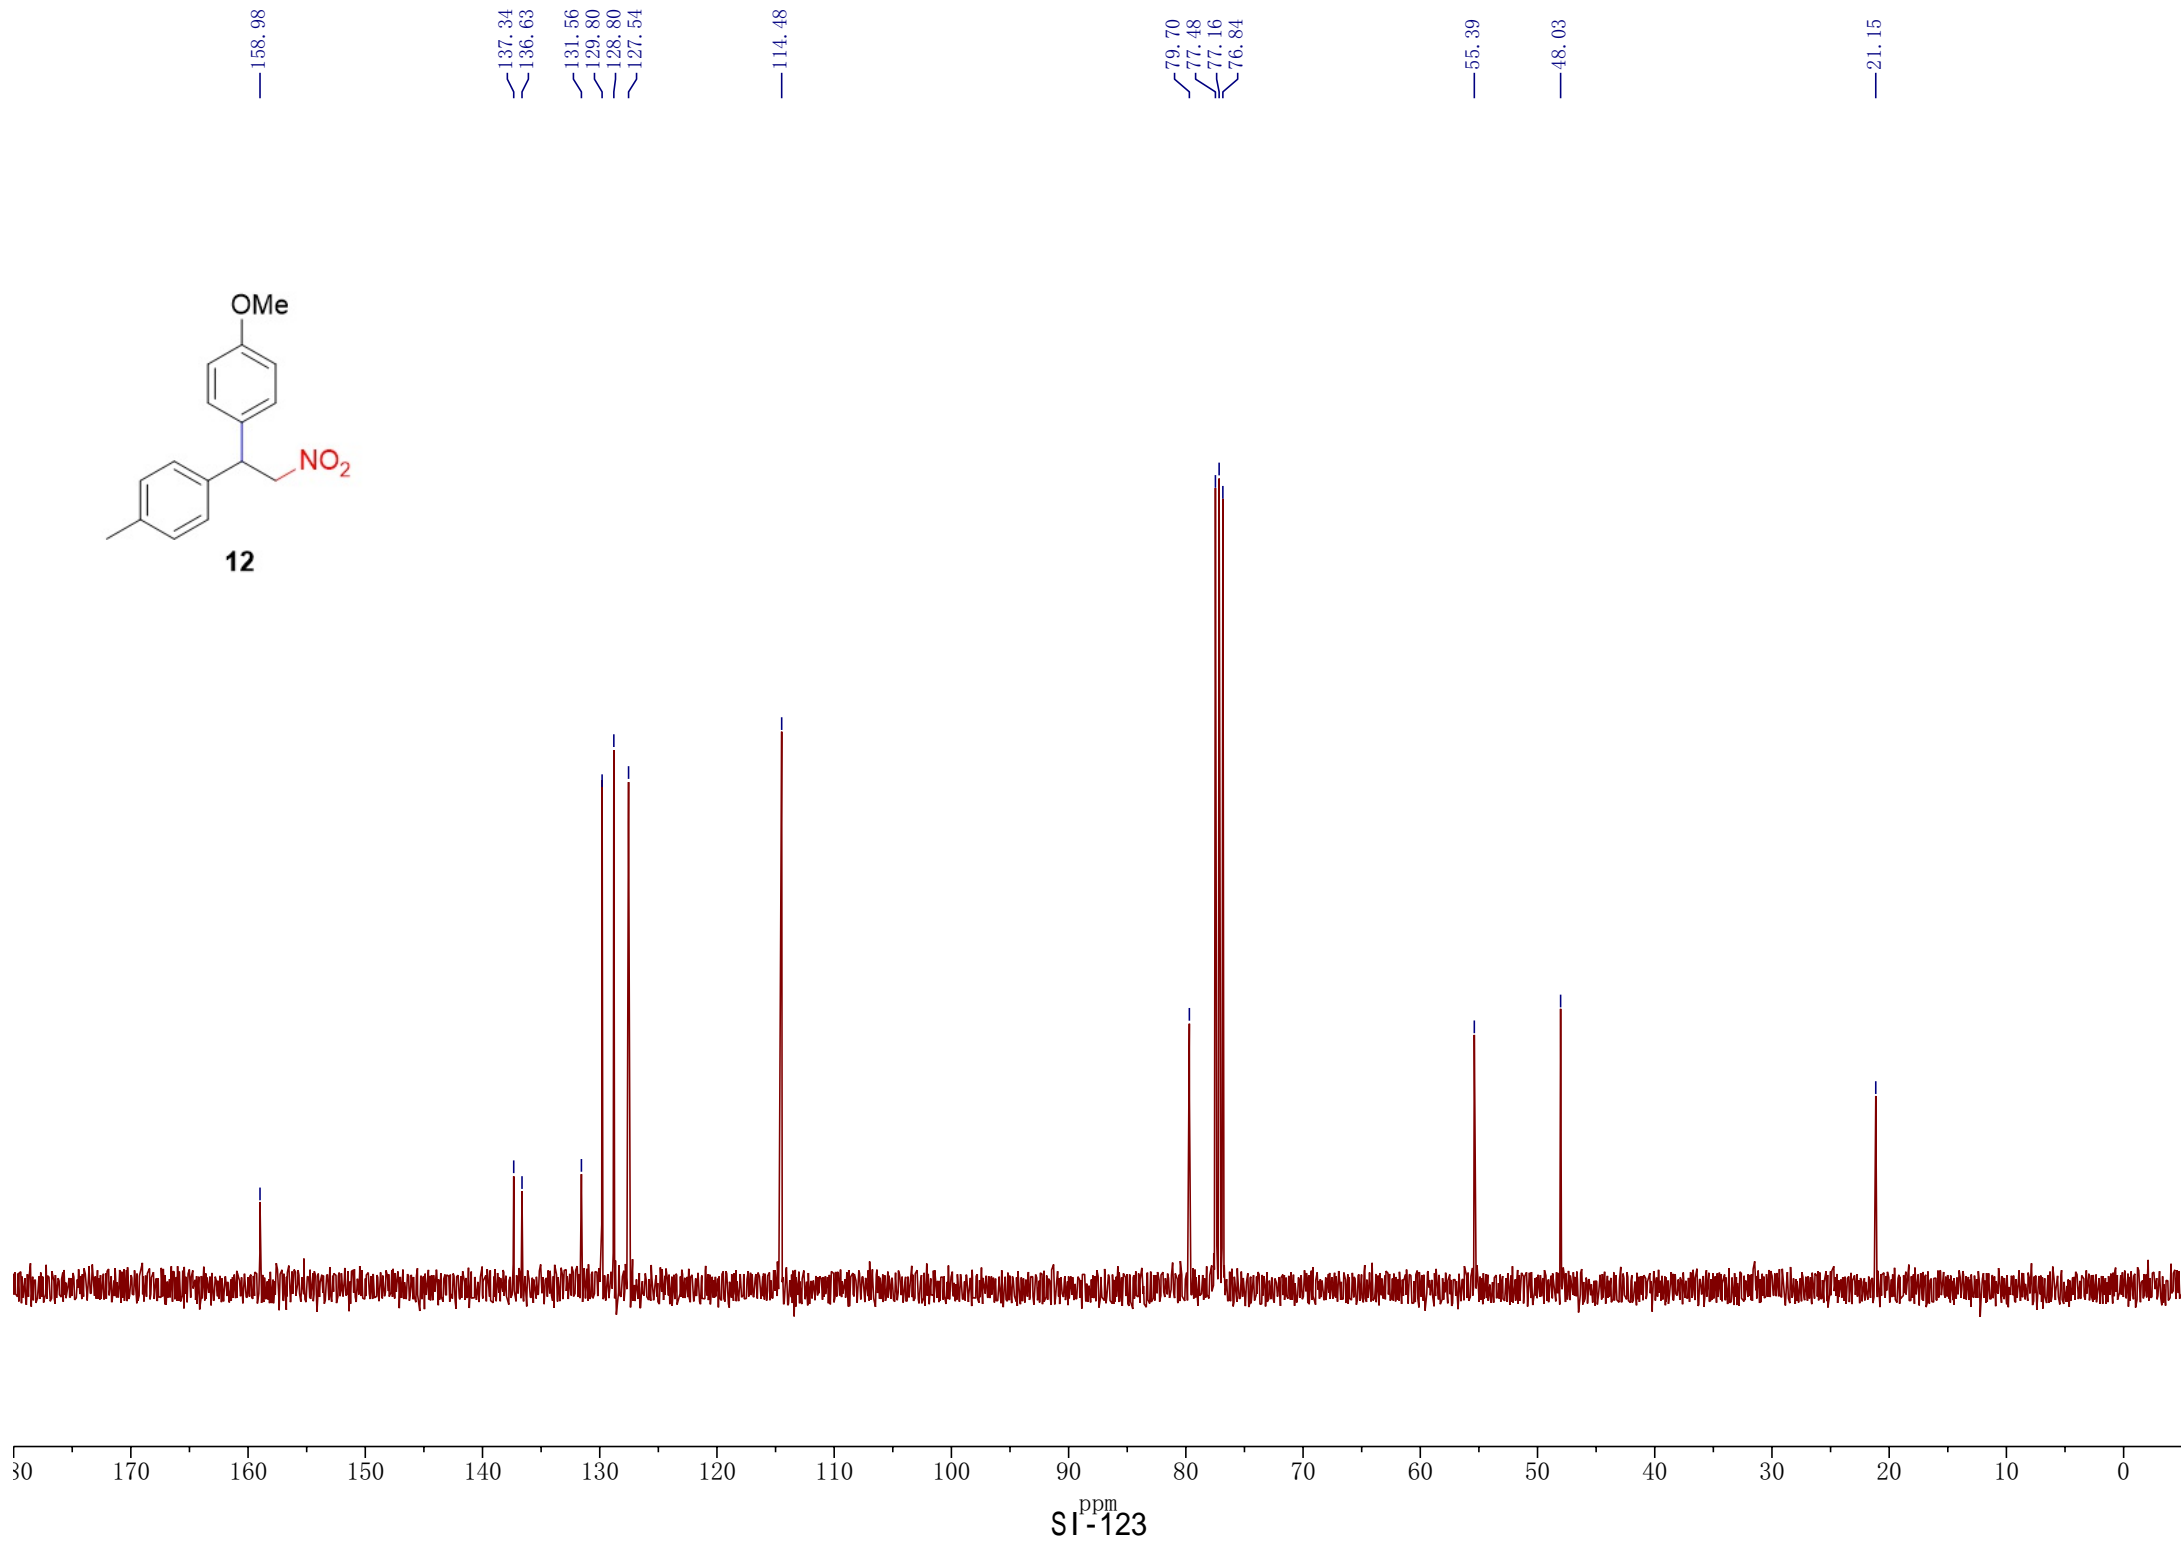

Supplement: d0qo00691b1.pdf [file d0qo00691b1.pdf]
